# Supplementary material for: Comparative transcriptome analyses in contrasting onion (Allium cepa L.) genotypes for drought stress
Source: PLoS One. 2020 Aug 11;15(8):e0237457. doi: 10.1371/journal.pone.0237457 (PMC7418993; doi:10.1371/journal.pone.0237457)
Supplement: S3 File — (XLSX) [file pone.0237457.s005.xlsx]

## Sheet: Summary
	Tool used
	1	Kallisto	Bray NL, Pimentel H, Melsted P, Pachter L. Near-optimal probabilistic RNA-seq quantification. Nat Biotechnol. 2016 May;34(5):525-7. doi: 10.1038/nbt.3519.
	2	DESeq	Anders S, Huber W. Differential expression analysis for sequence count data. Genome Biol. 2010;11(10):R106. doi: 10.1186/gb-2010-11-10-r106.
		Cutoff of Diffrenatial Analysis
		Parameter	Value
		pValue	0.05
		log2FoldChange for Up regulated Transcripts	2
		log2FoldChange for Down regulated Transcripts	-2
		TPM (One Condition)	>=1
		Statistics for Diffrenatial expressed Transcripts
		Parameter	Value
		Up Regulated Transcripts	1189
		Down Regulated Transcripts	1180
		Not Diffretially Regulated/Baseline expressed	257
		Total	2626

## Sheet: Complete Data (DESeq)
Transcript Ids	Transcript Length	Transcript Library	1656C Estimated Read Count (Control)	1656D Estimated Read Count (Drought)	Rounded Count 1656C	Rounded Count 1656D	1656C TPM (Control)	1656D TPM (Drought)	baseMean	baseMean_1656C	baseMean_1656D	foldChange [1656C vs. 1656D]	log2FoldChange [1656C vs. 1656D]	pval [1656C vs. 1656D]	padj [1656C vs. 1656D]
1656D_10000_c0_g1_i1	279	1656C;1656D	5	2	5	2	3.22113	1.368	3.62613	5.40062	1.85164	0.342857	-1.54432	0.534519	1
1656D_10002_c0_g1_i1	324	1656D	0	10	0	10	0	5.40645	4.6291	0	9.2582	-	-	0.0602193	1
1656D_10004_c0_g1_i1	202	1656C	5	0	5	0	5.71003	0	2.70031	5.40062	0	0	-	0.138223	1
1656D_10009_c0_g1_i1	271	1656C;1656D	5	5	5	5	3.3886	3.60075	5.01486	5.40062	4.6291	0.857143	-0.222392	1	1
1656D_10009_c1_g1_i1	218	1656C;1656D	2	2	2	2	1.97579	2.07188	2.00594	2.16025	1.85164	0.857143	-0.222392	1	1
1656D_10010_c0_g1_i1	209	1656C;1656D	3	1	3	1	3.20118	1.12884	2.0831	3.24037	0.92582	0.285714	-1.80735	0.635182	1
1656D_10010_c1_g1_i1	295	1656C;1656D	4	1	4	1	2.34849	0.623902	2.62316	4.32049	0.92582	0.214286	-2.22239	0.452547	1
1656D_10013_c0_g1_i1	309	1656C;1656D	5	9	5	9	2.74523	5.23114	6.8665	5.40062	8.33238	1.54286	0.625604	0.786425	1
1656D_10014_c0_g1_i1	526	1656C;1656D	11	11	11	11	2.47952	2.50707	11.0327	11.8814	10.184	0.857143	-0.222392	0.946597	1
1656D_10018_c0_g1_i1	276	1656C;1656D	4	1	4	1	2.62981	0.697407	2.62316	4.32049	0.92582	0.214286	-2.22239	0.452547	1
1656D_10018_c1_g1_i1	315	1656C;1656D	5	2	5	2	2.66398	1.1312	3.62613	5.40062	1.85164	0.342857	-1.54432	0.534519	1
1656D_10019_c0_g1_i1	280	1656C;1656D	6	2	6	2	3.84534	1.36213	4.16619	6.48074	1.85164	0.285714	-1.80735	0.421356	1
1656D_10020_c0_g1_i1	223	1656C;1656D	4	7	4	7	3.7681	7.00355	5.40062	4.32049	6.48074	1.5	0.584963	0.844754	1
1656D_10021_c0_g1_i1	227	1656C;1656D	2	4	2	4	1.82664	3.86428	2.93176	2.16025	3.70328	1.71429	0.777608	0.88701	1
1656D_10024_c0_g1_i1	235	1656C;1656D	1	3	1	3	0.860367	2.74199	1.92879	1.08012	2.77746	2.57143	1.36257	0.808713	1
1656D_10025_c0_g1_i1	207	1656C;1656D	3	2	3	2	3.25762	2.29773	2.54601	3.24037	1.85164	0.571429	-0.807355	0.902082	1
1656D_10033_c0_g1_i1	318	1656C;1656D	3	8	3	8	1.57719	4.45183	5.32347	3.24037	7.40656	2.28571	1.19265	0.580843	1
1656D_10034_c0_g1_i1	949	1656C;1656D	67	11	67	11	5.71404	0.954811	41.2761	72.3683	10.184	0.140725	-2.82905	0.0222033	0.726803
1656D_10040_c0_g1_i1	211	1656C;1656D	9	1	9	1	9.42469	1.10906	5.32347	9.72111	0.92582	0.0952381	-3.39232	0.12172	1
1656D_10041_c0_g1_i1	250	1656C	7	0	7	0	5.44887	0	3.78043	7.56086	0	0	-	0.0727312	1
1656D_10042_c0_g1_i1	314	1656C;1656D	1	5	1	5	0.534812	2.84429	2.85461	1.08012	4.6291	4.28571	2.09954	0.472704	1
1656D_10042_c1_g1_i1	234	1656C;1656D	1	4	1	4	0.86591	3.68773	2.3917	1.08012	3.70328	3.42857	1.77761	0.612428	1
1656D_10044_c0_g1_i1	285	1656C;1656D	10	4	10	4	6.21972	2.64715	7.25226	10.8012	3.70328	0.342857	-1.54432	0.387358	1
1656D_10045_c0_g1_i1	373	1656C;1656D	2	11	2	11	0.817948	4.72025	6.17213	2.16025	10.184	4.71429	2.23704	0.253151	1
1656D_10046_c0_g1_i1	422	1656D	0	8	0	8	0	2.75185	3.70328	0	7.40656	-	-	0.0931956	1
1656D_10046_c1_g1_i1	323	1656C;1656D	2	1	2	1	1.02534	0.542723	1.54303	2.16025	0.92582	0.428571	-1.22239	0.915332	1
1656D_10047_c0_g1_i1	267	1656C;1656D	4	8	4	8	2.77614	5.88631	5.86353	4.32049	7.40656	1.71429	0.777608	0.739051	1
1656D_10050_c0_g1_i1	379	1656C;1656D	4	7	4	7	1.59664	2.92494	5.40062	4.32049	6.48074	1.5	0.584963	0.844754	1
1656D_10051_c0_g1_i1	592	1656C;1656D	78	66	78	66	14.2062	12.1159	72.6769	84.2496	61.1041	0.725275	-0.463401	0.661974	1
1656D_10052_c0_g1_i1	349	1656C;1656D	4	8	4	8	1.81808	3.84712	5.86353	4.32049	7.40656	1.71429	0.777608	0.739051	1
1656D_10053_c0_g1_i1	226	1656D	0	7	0	7	0	6.81789	3.24037	0	6.48074	-	-	0.119041	1
1656D_10053_c1_g1_i1	253	1656D	0	5	0	5	0	4.04167	2.31455	0	4.6291	-	-	0.210896	1
1656D_10056_c0_g1_i1	432	1656C;1656D	2	15	2	15	0.640444	4.94681	8.02377	2.16025	13.8873	6.42857	2.6845	0.144325	1
1656D_10056_c1_g1_i1	352	1656D	0	3	0	3	0	1.41961	1.38873	0	2.77746	-	-	0.428162	1
1656D_10058_c0_g1_i1	254	1656C;1656D	7.41386	7.53218	7	8	5.61098	6.03789	7.48371	7.56086	7.40656	0.979592	-0.0297473	1	1
1656D_10060_c0_g1_i1	1508	1656C;1656D	108	106	108	106	4.99437	5.01803	107.395	116.653	98.1369	0.84127	-0.249359	0.802796	1
1656D_10062_c0_g1_i1	266	1656C;1656D	12	1	12	1	8.37394	0.740997	6.94365	12.9615	0.92582	0.0714286	-3.80735	0.0666762	1
1656D_10063_c0_g1_i1	225	1656C;1656D	2	5	2	5	1.8531	4.91427	3.39467	2.16025	4.6291	2.14286	1.09954	0.721617	1
1656D_10065_c0_g1_i1	552	1656C;1656D	14	15	14	15	2.89207	3.12574	14.5045	15.1217	13.8873	0.918367	-0.122857	0.985762	1
1656D_10067_c0_g1_i1	423	1656C;1656D	9.12552	18	9	18	3.03725	6.16899	13.1929	9.72111	16.6648	1.71429	0.777608	0.62276	1
1656D_10069_c0_g1_i1	207	1656C;1656D	4	4	4	4	4.3435	4.59546	4.01189	4.32049	3.70328	0.857143	-0.222392	1	1
1656D_10070_c0_g1_i1	247	1656C;1656D	4	6	4	6	3.16075	5.05037	4.93771	4.32049	5.55492	1.28571	0.36257	0.968366	1
1656D_10073_c0_g1_i1	221	1656C;1656D	2	1	2	1	1.92348	1.01621	1.54303	2.16025	0.92582	0.428571	-1.22239	0.915332	1
1656D_10075_c0_g1_i1	298	1656C;1656D	7	3	7	3	4.04592	1.84846	5.16916	7.56086	2.77746	0.367347	-1.44478	0.484262	1
1656D_10076_c0_g1_i1	278	1656C;1656D	2	4	2	4	1.29747	2.74881	2.93176	2.16025	3.70328	1.71429	0.777608	0.88701	1
1656D_10077_c0_g1_i1	1018	1656C;1656D	289	250	289	250	22.3211	19.679	271.805	312.156	231.455	0.741473	-0.431534	0.605262	1
1656D_10081_c0_g1_i1	211	1656C;1656D	1	2	1	2	1.04719	2.21812	1.46588	1.08012	1.85164	1.71429	0.777608	1	1
1656D_10081_c1_g1_i1	219	1656C;1656D	1	1	1	1	0.982097	1.02953	1.00297	1.08012	0.92582	0.857143	-0.222392	1	1
1656D_10082_c0_g1_i1	222	1656C;1656D	6	4	6	4	5.70978	4.03609	5.09201	6.48074	3.70328	0.571429	-0.807355	0.744312	1
1656D_10084_c0_g1_i1	204	1656C;1656D	3	4	3	4	3.36483	4.70892	3.47183	3.24037	3.70328	1.14286	0.192645	1	1
1656D_10085_c0_g1_i1	544	1656C;1656D	12	11	12	11	2.54384	2.35519	11.5728	12.9615	10.184	0.785714	-0.347923	0.869569	1
1656D_10088_c0_g1_i1	357	1656D	0	7	0	7	0	3.23533	3.24037	0	6.48074	-	-	0.119041	1
1656D_10088_c1_g1_i1	204	1656D	0	2	0	2	0	2.35446	0.92582	0	1.85164	-	-	0.653038	1
1656D_10089_c0_g1_i1	753	1656C;1656D	33	22	33	22	3.99506	2.69676	28.0061	35.6441	20.368	0.571429	-0.807355	0.525218	1
1656D_1008_c0_g1_i1	248	1656C	3	0	3	0	2.36042	0	1.62019	3.24037	0	0	-	0.316445	1
1656D_1008_c1_g1_i1	275	1656C	2	0	2	0	1.32197	0	1.08012	2.16025	0	0	-	0.522231	1
1656D_10090_c0_g1_i1	495	1656C;1656D	8	15	8	15	2.01908	3.82651	11.2641	8.64099	13.8873	1.60714	0.684498	0.689928	1
1656D_10091_c0_g1_i1	202	1656C;1656D	1	1	1	1	1.14201	1.19733	1.00297	1.08012	0.92582	0.857143	-0.222392	1	1
1656D_10092_c0_g1_i1	229	1656C	7	0	7	0	6.2926	0	3.78043	7.56086	0	0	-	0.0727312	1
1656D_10094_c0_g1_i1	827	1656D	0	39	0	39	0	4.13786	18.0535	0	36.107	-	-	0.00146157	0.140703
1656D_10094_c1_g1_i1	356	1656D	0	14	0	14	0	6.50034	6.48074	0	12.9615	-	-	0.0288114	0.812388
1656D_10095_c0_g1_i1	293	1656C;1656D	9	7	9	7	5.3437	4.42221	8.10093	9.72111	6.48074	0.666667	-0.584963	0.779495	1
1656D_10097_c0_g1_i1	281	1656C;1656D	8	2	8	2	5.09097	1.35554	5.24631	8.64099	1.85164	0.214286	-2.22239	0.2727	1
1656D_10098_c0_g1_i1	326	1656C;1656D	4	8	4	8	2.01781	4.29031	5.86353	4.32049	7.40656	1.71429	0.777608	0.739051	1
1656D_10099_c0_g1_i1	419	1656C;1656D	9	7	9	7	3.04589	2.43972	8.10093	9.72111	6.48074	0.666667	-0.584963	0.779495	1
1656D_100_c0_g1_i1	213	1656C;1656D	2	7	2	7	2.06569	7.6037	4.32049	2.16025	6.48074	3	1.58496	0.492048	1
1656D_10102_c0_g1_i1	435	1656C;1656D	4	4	4	4	1.26588	1.30318	4.01189	4.32049	3.70328	0.857143	-0.222392	1	1
1656D_10102_c1_g1_i1	207	1656C;1656D	4	2	4	2	4.3435	2.29773	3.08607	4.32049	1.85164	0.428571	-1.22239	0.688967	1
1656D_10104_c0_g1_i1	219	1656C;1656D	1	1	1	1	0.982097	1.02953	1.00297	1.08012	0.92582	0.857143	-0.222392	1	1
1656D_10104_c1_g1_i1	281	1656C;1656D	2	3	2	3	1.27274	2.03331	2.46885	2.16025	2.77746	1.28571	0.36257	1	1
1656D_10105_c0_g1_i1	220	1656C;1656D	2	4	2	4	1.94246	4.08783	2.93176	2.16025	3.70328	1.71429	0.777608	0.88701	1
1656D_10107_c0_g1_i1	299	1656C;1656D	10	6	10	6	5.75742	3.67829	8.17808	10.8012	5.55492	0.514286	-0.959358	0.594796	1
1656D_10107_c1_g1_i1	277	1656C;1656D	4	5	4	5	2.6143	3.46262	4.4748	4.32049	4.6291	1.07143	0.0995357	1	1
1656D_10110_c0_g1_i1	253	1656C;1656D	4	9	4	9	3.04549	7.27501	6.32644	4.32049	8.33238	1.92857	0.947533	0.648739	1
1656D_10111_c0_g1_i1	328	1656C;1656D	7	5	7	5	3.50105	2.65767	6.09498	7.56086	4.6291	0.612245	-0.707819	0.75953	1
1656D_10112_c0_g1_i1	707	1656C;1656D	14	22	14	22	1.87731	2.98482	17.7449	15.1217	20.368	1.34694	0.429684	0.78559	1
1656D_10113_c0_g1_i1	640	1656C;1656D	4	29	4	29	0.635094	4.64178	15.5846	4.32049	26.8488	6.21429	2.63559	0.0831761	1
1656D_10114_c0_g1_i1	653	1656C;1656D	19	14	19	14	2.91291	2.16543	16.7419	20.5223	12.9615	0.631579	-0.662965	0.654218	1
1656D_10115_c0_g1_i1	207	1656D	0	3	0	3	0	3.44659	1.38873	0	2.77746	-	-	0.428162	1
1656D_10115_c1_g1_i1	363	1656C;1656D	3	5	3	5	1.27913	2.24695	3.93474	3.24037	4.6291	1.42857	0.514573	0.935572	1
1656D_10116_c0_g1_i1	629	1656C;1656D	8	11	8	11	1.30926	1.81393	9.4125	8.64099	10.184	1.17857	0.237039	0.954267	1
1656D_10118_c0_g1_i1	974	1656C;1656D	32	22	32	22	2.6298	1.84134	27.466	34.564	20.368	0.589286	-0.762961	0.551236	1
1656D_10119_c0_g1_i1	202	1656C;1656D	1	3	1	3	1.14201	3.59199	1.92879	1.08012	2.77746	2.57143	1.36257	0.808713	1
1656D_10120_c0_g1_i1	286	1656C;1656D	4	4	4	4	2.47228	2.63283	4.01189	4.32049	3.70328	0.857143	-0.222392	1	1
1656D_10121_c0_g2_i1	861	1656C;1656D	173	101	173	101	17.0155	10.0915	140.185	186.861	93.5078	0.500413	-0.998809	0.278595	1
1656D_10122_c0_g1_i1	412	1656C;1656D	11	6	11	6	3.83131	2.15516	8.71814	11.8814	5.55492	0.467532	-1.09686	0.524716	1
1656D_10124_c0_g1_i1	233	1656C;1656D	2	2	2	2	1.74487	1.86003	2.00594	2.16025	1.85164	0.857143	-0.222392	1	1
1656D_10124_c1_g1_i1	213	1656D	0	1	0	1	0	1.08624	0.46291	0	0.92582	-	-	1	1
1656D_10125_c0_g1_i1	433	1656C;1656D	22	4	22	4	7.01472	1.31416	13.733	23.7627	3.70328	0.155844	-2.68182	0.0828766	1
1656D_10126_c0_g1_i1	267	1656C;1656D	6	2	6	2	4.16421	1.47158	4.16619	6.48074	1.85164	0.285714	-1.80735	0.421356	1
1656D_1012_c0_g1_i1	212	1656C;1656D	6	5	6	5	6.23112	5.48761	5.55492	6.48074	4.6291	0.714286	-0.485427	0.884459	1
1656D_10130_c0_g1_i1	228	1656D	0	5	0	5	0	4.79911	2.31455	0	4.6291	-	-	0.210896	1
1656D_10132_c1_g1_i1	318	1656C;1656D	1	2	1	2	0.525729	1.11296	1.46588	1.08012	1.85164	1.71429	0.777608	1	1
1656D_10133_c0_g1_i1	350	1656C;1656D	2	27	2	27	0.904439	12.9203	13.5787	2.16025	24.9971	11.5714	3.5325	0.0372168	0.920048
1656D_10137_c0_g1_i1	479	1656C;1656D	10	7	10	7	2.67499	1.89909	8.64099	10.8012	6.48074	0.6	-0.736966	0.693133	1
1656D_10137_c0_g2_i1	253	1656D	0	4	0	4	0	3.23334	1.85164	0	3.70328	-	-	0.295121	1
1656D_10138_c0_g1_i1	1905	1656C;1656D	68	65	68	65	2.3731	2.32594	66.8134	73.4484	60.1783	0.819328	-0.287487	0.795895	1
1656D_10139_c0_g1_i1	226	1656C;1656D	2	7	2	7	1.83748	6.81789	4.32049	2.16025	6.48074	3	1.58496	0.492048	1
1656D_10140_c0_g1_i1	231	1656D	0	7	0	7	0	6.58596	3.24037	0	6.48074	-	-	0.119041	1
1656D_10141_c0_g1_i1	241	1656C;1656D	2	6	2	6	1.64769	5.27202	3.85758	2.16025	5.55492	2.57143	1.36257	0.59295	1
1656D_10142_c0_g1_i1	322	1656C;1656D	8	5	8	5	4.12078	2.72692	6.63504	8.64099	4.6291	0.535714	-0.900464	0.654634	1
1656D_10143_c0_g1_i1	247	1656C;1656D	8	15	8	15	6.3215	12.6259	11.2641	8.64099	13.8873	1.60714	0.684498	0.689928	1
1656D_10144_c0_g1_i1	255	1656D	0	5	0	5	0	3.98537	2.31455	0	4.6291	-	-	0.210896	1
1656D_10148_c0_g1_i1	208	1656C;1656D	1	4	1	4	1.07869	4.55213	2.3917	1.08012	3.70328	3.42857	1.77761	0.612428	1
1656D_10149_c0_g1_i1	357	1656C;1656D	5	10	5	10	2.19089	4.6219	7.32941	5.40062	9.2582	1.71429	0.777608	0.702285	1
1656D_10152_c0_g1_i1	402	1656C;1656D	7	8	7	8	2.53943	3.01336	7.48371	7.56086	7.40656	0.979592	-0.0297473	1	1
1656D_10153_c0_g1_i1	280	1656C;1656D	5	2	5	2	3.20445	1.36213	3.62613	5.40062	1.85164	0.342857	-1.54432	0.534519	1
1656D_10155_c0_g1_i1	816	1656C;1656D	390	378	390	378	41.6119	40.9261	385.604	421.248	349.96	0.830769	-0.26748	0.741235	1
1656D_10156_c0_g1_i1	208	1656C;1656D	4	5	4	5	4.31477	5.69017	4.4748	4.32049	4.6291	1.07143	0.0995357	1	1
1656D_10158_c0_g1_i1	404	1656C;1656D	4	10	4	10	1.43905	3.73093	6.78935	4.32049	9.2582	2.14286	1.09954	0.571456	1
1656D_10159_c0_g1_i1	282	1656C;1656D	7	4	7	4	4.42346	2.69603	5.63207	7.56086	3.70328	0.489796	-1.02975	0.626625	1
1656D_10162_c0_g1_i1	628	1656C;1656D	157	163	157	163	25.7637	26.9529	160.244	169.579	150.909	0.8899	-0.168285	0.856892	1
1656D_10163_c0_g1_i1	258	1656C;1656D	7	9	7	9	5.16049	7.01498	7.94662	7.56086	8.33238	1.10204	0.140178	1	1
1656D_10164_c0_g1_i1	221	1656C;1656D	1	3	1	3	0.961738	3.04862	1.92879	1.08012	2.77746	2.57143	1.36257	0.808713	1
1656D_10165_c0_g1_i1	322	1656C;1656D	10	11	10	11	5.15097	5.99922	10.4926	10.8012	10.184	0.942857	-0.0848889	1	1
1656D_10166_c1_g1_i1	258	1656C;1656D	4	6	4	6	2.94885	4.67665	4.93771	4.32049	5.55492	1.28571	0.36257	0.968366	1
1656D_10167_c0_g2_i1	204	1656C;1656D	4.44336	5.27303	4	5	4.98371	6.20758	4.4748	4.32049	4.6291	1.07143	0.0995357	1	1
1656D_10168_c0_g1_i1	471	1656C;1656D	24	11	24	11	6.63138	3.08233	18.0535	25.923	10.184	0.392857	-1.34792	0.329905	1
1656D_10169_c0_g1_i1	282	1656C	8	0	8	0	5.05538	0	4.32049	8.64099	0	0	-	0.0552302	1
1656D_1016_c0_g1_i1	264	1656C;1656D	2	4	2	4	1.41284	2.99853	2.93176	2.16025	3.70328	1.71429	0.777608	0.88701	1
1656D_10170_c0_g1_i1	247	1656C	11	0	11	0	8.69207	0	5.94068	11.8814	0	0	-	0.0269418	0.789742
1656D_10171_c0_g2_i1	297	1656C;1656D	11	7	11	7	6.38837	4.32399	9.18105	11.8814	6.48074	0.545455	-0.874469	0.617563	1
1656D_10173_c0_g1_i1	224	1656C;1656D	4	3	4	3	3.73264	2.96813	3.54898	4.32049	2.77746	0.642857	-0.63743	0.894145	1
1656D_10174_c0_g1_i1	797	1656C;1656D	84.5543	656.224	85	656	9.35667	73.6379	349.574	91.8105	607.338	6.61513	2.72577	0.00159535	0.151402
1656D_10174_c0_g2_i1	732	1656C;1656D	3.44567	23.7765	3	24	0.436451	3.04848	12.73	3.24037	22.2197	6.85714	2.77761	0.0861236	1
1656D_10175_c0_g1_i1	538	1656C;1656D	8	6	8	6	1.7301	1.31149	7.09795	8.64099	5.55492	0.642857	-0.63743	0.770856	1
1656D_10177_c0_g1_i1	212	1656C	10	0	10	0	10.3852	0	5.40062	10.8012	0	0	-	0.0336981	0.861749
1656D_10178_c0_g1_i1	648	1656C;1656D	79	7	79	7	12.2733	1.09696	45.9052	85.3298	6.48074	0.0759494	-3.71882	0.00376862	0.267584
1656D_10179_c0_g1_i1	324	1656C;1656D	2	8	2	8	1.02038	4.32516	4.7834	2.16025	7.40656	3.42857	1.77761	0.412	1
1656D_10181_c0_g1_i1	276	1656C;1656D	2	11	2	11	1.31491	7.67148	6.17213	2.16025	10.184	4.71429	2.23704	0.253151	1
1656D_10182_c0_g1_i1	304	1656C;1656D	1	2	1	2	0.561583	1.19608	1.46588	1.08012	1.85164	1.71429	0.777608	1	1
1656D_10182_c1_g1_i1	291	1656C;1656D	2	6	2	6	1.19994	3.83277	3.85758	2.16025	5.55492	2.57143	1.36257	0.59295	1
1656D_10183_c0_g1_i1	214	1656C;1656D	1	6	1	6	1.02244	6.46111	3.31752	1.08012	5.55492	5.14286	2.36257	0.372187	1
1656D_10184_c0_g1_i1	358	1656C;1656D	3	9	3	9	1.30905	4.14028	5.78638	3.24037	8.33238	2.57143	1.36257	0.500783	1
1656D_10185_c0_g1_i1	288	1656C;1656D	4	8	4	8	2.44301	5.20202	5.86353	4.32049	7.40656	1.71429	0.777608	0.739051	1
1656D_10186_c0_g1_i1	663	1656C;1656D	18	11	18	11	2.68906	1.65851	14.8131	19.4422	10.184	0.52381	-0.932886	0.52809	1
1656D_10188_c0_g1_i1	659	1656C;1656D	57	107	57	107	8.60294	16.2951	80.3149	61.567	99.0628	1.60902	0.686185	0.504894	1
1656D_10189_c0_g1_i1	248	1656C;1656D	7	3	7	3	5.50765	2.50395	5.16916	7.56086	2.77746	0.367347	-1.44478	0.484262	1
1656D_1018_c0_g1_i1	211	1656C;1656D	4	2	4	2	4.18875	2.21812	3.08607	4.32049	1.85164	0.428571	-1.22239	0.688967	1
1656D_10190_c0_g1_i1	399	1656C;1656D	4	6	4	6	1.46935	2.29027	4.93771	4.32049	5.55492	1.28571	0.36257	0.968366	1
1656D_10191_c0_g1_i1	649	1656C;1656D	9	31	9	31	1.39438	4.84494	19.2108	9.72111	28.7004	2.95238	1.56188	0.257674	1
1656D_10192_c0_g1_i1	226	1656C;1656D	5	8	5	8	4.59369	7.79188	6.40359	5.40062	7.40656	1.37143	0.455679	0.882513	1
1656D_10193_c0_g1_i1	206	1656C;1656D	8	6	8	6	8.76829	6.96405	7.09795	8.64099	5.55492	0.642857	-0.63743	0.770856	1
1656D_10194_c0_g1_i1	491	1656C;1656D	13	8	13	8	3.32972	2.07266	10.7241	14.0416	7.40656	0.527473	-0.922832	0.573516	1
1656D_10194_c1_g1_i1	282	1656C;1656D	2	1	2	1	1.26384	0.674007	1.54303	2.16025	0.92582	0.428571	-1.22239	0.915332	1
1656D_10195_c0_g1_i1	218	1656C;1656D	4	2	4	2	3.95158	2.07188	3.08607	4.32049	1.85164	0.428571	-1.22239	0.688967	1
1656D_10196_c0_g1_i1	244	1656C;1656D	9	3	9	3	7.27411	2.57572	6.24929	9.72111	2.77746	0.285714	-1.80735	0.335959	1
1656D_10198_c0_g1_i1	207	1656C;1656D	3	5	3	5	3.25762	5.74432	3.93474	3.24037	4.6291	1.42857	0.514573	0.935572	1
1656D_10199_c0_g1_i1	225	1656D	0	6	0	6	0	5.89713	2.77746	0	5.55492	-	-	0.155871	1
1656D_1019_c0_g1_i1	202	1656C;1656D	3	4	3	4	3.42602	4.78932	3.47183	3.24037	3.70328	1.14286	0.192645	1	1
1656D_10200_c0_g1_i1	705	1656C;1656D	304	189	304	189	40.955	25.7599	251.669	328.358	174.98	0.532895	-0.908078	0.281222	1
1656D_10203_c0_g1_i1	954	1656C;1656D	18	25	18	25	1.52361	2.15396	21.2939	19.4422	23.1455	1.19048	0.251539	0.882375	1
1656D_10204_c0_g1_i1	378	1656C;1656D	4	7	4	7	1.60305	2.9371	5.40062	4.32049	6.48074	1.5	0.584963	0.844754	1
1656D_10206_c0_g1_i1	283	1656C;1656D	5	2	5	2	3.14306	1.34057	3.62613	5.40062	1.85164	0.342857	-1.54432	0.534519	1
1656D_10207_c0_g1_i1	273	1656C;1656D	8	1	8	1	5.35824	0.71128	4.7834	8.64099	0.92582	0.107143	-3.22239	0.152555	1
1656D_10210_c0_g1_i1	304	1656C;1656D	2	7	2	7	1.12317	4.18627	4.32049	2.16025	6.48074	3	1.58496	0.492048	1
1656D_10211_c0_g1_i1	212	1656C;1656D	3	3	3	3	3.11556	3.29257	3.00892	3.24037	2.77746	0.857143	-0.222392	1	1
1656D_10216_c0_g1_i1	767	1656C;1656D	15	18	15	18	1.76337	2.14367	16.4333	16.2019	16.6648	1.02857	0.040642	1	1
1656D_10217_c0_g1_i1	241	1656C	3	0	3	0	2.47153	0	1.62019	3.24037	0	0	-	0.316445	1
1656D_10217_c1_g1_i1	310	1656C;1656D	7	1	7	1	3.82142	0.578304	4.24334	7.56086	0.92582	0.122449	-3.02975	0.193965	1
1656D_10218_c0_g1_i1	214	1656C;1656D	1	1	1	1	1.02244	1.07685	1.00297	1.08012	0.92582	0.857143	-0.222392	1	1
1656D_10218_c1_g1_i1	214	1656C;1656D	1	1	1	1	1.02244	1.07685	1.00297	1.08012	0.92582	0.857143	-0.222392	1	1
1656D_1021_c0_g1_i1	225	1656D	0	8	0	8	0	7.86284	3.70328	0	7.40656	-	-	0.0931956	1
1656D_10221_c0_g1_i1	262	1656C;1656D	3	4	3	4	2.15129	3.04338	3.47183	3.24037	3.70328	1.14286	0.192645	1	1
1656D_10222_c0_g1_i1	308	1656C;1656D	2	4	2	4	1.10276	2.33718	2.93176	2.16025	3.70328	1.71429	0.777608	0.88701	1
1656D_10223_c0_g1_i1	221	1656C	7	0	7	0	6.73216	0	3.78043	7.56086	0	0	-	0.0727312	1
1656D_10224_c0_g1_i1	610	1656C;1656D	7	12	7	12	1.20935	2.0882	9.33535	7.56086	11.1098	1.46939	0.555215	0.780827	1
1656D_10224_c1_g1_i1	255	1656D	0	2	0	2	0	1.59415	0.92582	0	1.85164	-	-	0.653038	1
1656D_10225_c0_g1_i1	434	1656C	26	0	26	0	8.25388	0	14.0416	28.0832	0	0	-	0.00236539	0.195881
1656D_10226_c0_g1_i1	311	1656C;1656D	6	7	6	7	3.26017	4.02717	6.48074	6.48074	6.48074	1	0	1	1
1656D_10229_c0_g1_i1	225	1656C;1656D	3	5	3	5	2.77965	4.91427	3.93474	3.24037	4.6291	1.42857	0.514573	0.935572	1
1656D_10230_c0_g1_i1	336	1656C	10	0	10	0	4.82199	0	5.40062	10.8012	0	0	-	0.0336981	0.861749
1656D_10232_c0_g1_i1	210	1656D	0	3	0	3	0	3.35608	1.38873	0	2.77746	-	-	0.428162	1
1656D_10233_c0_g1_i1	1287	1656C;1656D	17	32	17	32	0.959864	1.84691	23.9942	18.3621	29.6262	1.61345	0.690145	0.606814	1
1656D_10233_c1_g1_i1	202	1656C;1656D	2	2	2	2	2.28401	2.39466	2.00594	2.16025	1.85164	0.857143	-0.222392	1	1
1656D_10234_c0_g1_i1	206	1656C;1656D	3	1	3	1	3.28811	1.16068	2.0831	3.24037	0.92582	0.285714	-1.80735	0.635182	1
1656D_10235_c0_g1_i1	212	1656C	2	0	2	0	2.07704	0	1.08012	2.16025	0	0	-	0.522231	1
1656D_10235_c1_g1_i1	374	1656C;1656D	4	5	4	5	1.62772	2.13696	4.4748	4.32049	4.6291	1.07143	0.0995357	1	1
1656D_10236_c0_g1_i1	204	1656C;1656D	2	5	2	5	2.24322	5.88615	3.39467	2.16025	4.6291	2.14286	1.09954	0.721617	1
1656D_10237_c0_g1_i1	258	1656C;1656D	5	2	5	2	3.68606	1.55888	3.62613	5.40062	1.85164	0.342857	-1.54432	0.534519	1
1656D_10237_c1_g1_i1	285	1656C;1656D	6	2	6	2	3.73183	1.32358	4.16619	6.48074	1.85164	0.285714	-1.80735	0.421356	1
1656D_10238_c0_g1_i1	238	1656D	0	5	0	5	0	4.48852	2.31455	0	4.6291	-	-	0.210896	1
1656D_1023_c0_g1_i1	235	1656C;1656D	5	2	5	2	4.30184	1.828	3.62613	5.40062	1.85164	0.342857	-1.54432	0.534519	1
1656D_10241_c0_g1_i1	203	1656C;1656D	2	2	2	2	2.26112	2.37485	2.00594	2.16025	1.85164	0.857143	-0.222392	1	1
1656D_10242_c0_g1_i1	210	1656C;1656D	2	5	2	5	2.11815	5.59346	3.39467	2.16025	4.6291	2.14286	1.09954	0.721617	1
1656D_10246_c0_g1_i1	256	1656C;1656D	3	4	3	4	2.2372	3.16554	3.47183	3.24037	3.70328	1.14286	0.192645	1	1
1656D_10248_c0_g1_i1	204	1656D	0	7	0	7	0	8.24062	3.24037	0	6.48074	-	-	0.119041	1
1656D_10248_c1_g1_i1	217	1656D	0	4	0	4	0	4.17958	1.85164	0	3.70328	-	-	0.295121	1
1656D_1024_c0_g1_i1	245	1656C;1656D	3	6	3	6	2.40599	5.11451	4.39765	3.24037	5.55492	1.71429	0.777608	0.793982	1
1656D_10251_c0_g1_i1	202	1656C;1656D	4	1	4	1	4.56803	1.19733	2.62316	4.32049	0.92582	0.214286	-2.22239	0.452547	1
1656D_10252_c0_g1_i1	245	1656D	0	4	0	4	0	3.40968	1.85164	0	3.70328	-	-	0.295121	1
1656D_10252_c1_g1_i1	201	1656C;1656D	6	3	6	3	6.92213	3.63889	4.6291	6.48074	2.77746	0.428571	-1.22239	0.58886	1
1656D_10253_c0_g1_i1	720	1656C;1656D	36	25	36	25	4.68375	3.29239	31.015	38.8844	23.1455	0.595238	-0.748461	0.548252	1
1656D_10253_c1_g1_i1	355	1656C;1656D	9	2	9	2	3.97641	0.933639	5.78638	9.72111	1.85164	0.190476	-2.39232	0.223188	1
1656D_10255_c0_g1_i1	205	1656C;1656D	6	3	6	3	6.65645	3.50268	4.6291	6.48074	2.77746	0.428571	-1.22239	0.58886	1
1656D_10256_c0_g1_i1	391	1656C;1656D	2	6	2	6	0.758475	2.37446	3.85758	2.16025	5.55492	2.57143	1.36257	0.59295	1
1656D_10257_c0_g1_i1	400	1656C;1656D	5	6	5	6	1.82879	2.28062	5.47777	5.40062	5.55492	1.02857	0.040642	1	1
1656D_10258_c0_g1_i1	228	1656C	2	0	2	0	1.8119	0	1.08012	2.16025	0	0	-	0.522231	1
1656D_10258_c1_g1_i1	253	1656C;1656D	3	4	3	4	2.28412	3.23334	3.47183	3.24037	3.70328	1.14286	0.192645	1	1
1656D_10259_c0_g1_i1	260	1656C;1656D	2	4	2	4	1.45308	3.07982	2.93176	2.16025	3.70328	1.71429	0.777608	0.88701	1
1656D_10261_c0_g1_i1	237	1656C;1656D	7	2	7	2	5.94901	1.80813	4.70625	7.56086	1.85164	0.244898	-2.02975	0.336922	1
1656D_10264_c0_g1_i1	238	1656D	0	4	0	4	0	3.59081	1.85164	0	3.70328	-	-	0.295121	1
1656D_10266_c0_g1_i1	265	1656C;1656D	3	10	3	10	2.10452	7.45066	6.24929	3.24037	9.2582	2.85714	1.51457	0.434072	1
1656D_10268_c0_g1_i1	534	1656C;1656D	8	4	8	4	1.75355	0.885836	6.17213	8.64099	3.70328	0.428571	-1.22239	0.530668	1
1656D_10269_c0_g1_i1	613	1656C;1656D	4	7	4	7	0.684979	1.20765	5.40062	4.32049	6.48074	1.5	0.584963	0.844754	1
1656D_10269_c1_g1_i1	245	1656C	2	0	2	0	1.60399	0	1.08012	2.16025	0	0	-	0.522231	1
1656D_10271_c0_g1_i1	234	1656C;1656D	4	4	4	4	3.46364	3.68773	4.01189	4.32049	3.70328	0.857143	-0.222392	1	1
1656D_10272_c0_g1_i1	232	1656C;1656D	3	5	3	5	2.63504	4.67165	3.93474	3.24037	4.6291	1.42857	0.514573	0.935572	1
1656D_10273_c0_g1_i1	239	1656C;1656D	5	5	5	5	4.18208	4.4571	5.01486	5.40062	4.6291	0.857143	-0.222392	1	1
1656D_10274_c0_g1_i1	480	1656C;1656D	6	5	6	5	1.5993	1.35077	5.55492	6.48074	4.6291	0.714286	-0.485427	0.884459	1
1656D_10275_c0_g1_i1	234	1656C;1656D	1	16	1	16	0.86591	14.7509	7.94662	1.08012	14.8131	13.7143	3.77761	0.0646956	1
1656D_10276_c0_g1_i1	1155	1656C;1656D	92	111	92	111	5.98437	7.37148	101.069	99.3714	102.766	1.03416	0.0484615	0.971676	1
1656D_10279_c0_g1_i1	235	1656C;1656D	3	3	3	3	2.5811	2.74199	3.00892	3.24037	2.77746	0.857143	-0.222392	1	1
1656D_10280_c0_g1_i1	211	1656C;1656D	2	1	2	1	2.09438	1.10906	1.54303	2.16025	0.92582	0.428571	-1.22239	0.915332	1
1656D_10280_c1_g1_i1	347	1656C	6	0	6	0	2.754	0	3.24037	6.48074	0	0	-	0.0984225	1
1656D_10282_c0_g1_i1	441	1656D	0	10	0	10	0	3.17244	4.6291	0	9.2582	-	-	0.0602193	1
1656D_10282_c1_g1_i1	238	1656C;1656D	1	3	1	3	0.8434	2.69311	1.92879	1.08012	2.77746	2.57143	1.36257	0.808713	1
1656D_10283_c0_g1_i1	377	1656C;1656D	16	7	16	7	6.43306	2.95009	11.8814	17.282	6.48074	0.375	-1.41504	0.357286	1
1656D_10284_c0_g1_i1	726	1656C;1656D	17	19	17	19	2.18227	2.4687	17.9763	18.3621	17.5906	0.957983	-0.0619277	1	1
1656D_10285_c0_g1_i1	1889	1656C;1656D	84	98	84	98	2.96076	3.54165	90.7304	90.7304	90.7304	1	0	1	1
1656D_10286_c0_g1_i1	328	1656C;1656D	6	5	6	5	3.0009	2.65767	5.55492	6.48074	4.6291	0.714286	-0.485427	0.884459	1
1656D_10287_c0_g1_i1	317	1656C;1656D	8	1	8	1	4.22293	0.559198	4.7834	8.64099	0.92582	0.107143	-3.22239	0.152555	1
1656D_10288_c0_g1_i1	217	1656C;1656D	3	3	3	3	2.98471	3.13468	3.00892	3.24037	2.77746	0.857143	-0.222392	1	1
1656D_10290_c0_g1_i1	222	1656D	0	5	0	5	0	5.04511	2.31455	0	4.6291	-	-	0.210896	1
1656D_10291_c0_g1_i1	211	1656C	7	0	7	0	7.33032	0	3.78043	7.56086	0	0	-	0.0727312	1
1656D_10294_c0_g1_i1	243	1656C;1656D	1	7	1	7	0.813578	6.06239	3.78043	1.08012	6.48074	6	2.58496	0.298202	1
1656D_10296_c0_g1_i1	243	1656D	0	6	0	6	0	5.19634	2.77746	0	5.55492	-	-	0.155871	1
1656D_10296_c1_g1_i1	297	1656C;1656D	3	10	3	10	1.74228	6.17713	6.24929	3.24037	9.2582	2.85714	1.51457	0.434072	1
1656D_10297_c0_g1_i1	412	1656C;1656D	11	13	11	13	3.83131	4.66952	11.9585	11.8814	12.0357	1.01299	0.0186157	1	1
1656D_10299_c0_g2_i1	577	1656C;1656D	9	9	9	9	1.71591	1.72989	9.02675	9.72111	8.33238	0.857143	-0.222392	0.964681	1
1656D_10299_c1_g1_i1	249	1656C;1656D	1	3	1	3	0.783052	2.48927	1.92879	1.08012	2.77746	2.57143	1.36257	0.808713	1
1656D_10300_c0_g1_i1	443	1656C;1656D	18	12	18	12	5.51858	3.77727	15.276	19.4422	11.1098	0.571429	-0.807355	0.586938	1
1656D_10302_c0_g1_i1	415	1656C;1656D	12	12	12	12	4.12768	4.25388	12.0357	12.9615	11.1098	0.857143	-0.222392	0.939384	1
1656D_10305_c0_g1_i1	211	1656C;1656D	6	4	6	4	6.28313	4.43623	5.09201	6.48074	3.70328	0.571429	-0.807355	0.744312	1
1656D_10308_c0_g1_i1	232	1656C;1656D	3	5	3	5	2.63504	4.67165	3.93474	3.24037	4.6291	1.42857	0.514573	0.935572	1
1656D_10309_c0_g1_i1	204	1656C;1656D	4	4	4	4	4.48643	4.70892	4.01189	4.32049	3.70328	0.857143	-0.222392	1	1
1656D_10311_c0_g1_i1	217	1656C;1656D	5	1	5	1	4.97452	1.04489	3.16322	5.40062	0.92582	0.171429	-2.54432	0.332471	1
1656D_10316_c0_g1_i1	284	1656C;1656D	5	7	5	7	3.12608	4.65615	5.94068	5.40062	6.48074	1.2	0.263034	0.9921	1
1656D_10318_c0_g1_i1	386	1656C;1656D	4.35969	5	4	5	1.69054	2.02274	4.4748	4.32049	4.6291	1.07143	0.0995357	1	1
1656D_10319_c0_g1_i1	1266	1656C;1656D	44	11	44	11	2.53764	0.648378	28.8547	47.5254	10.184	0.214286	-2.22239	0.0830925	1
1656D_10321_c0_g1_i1	310	1656C;1656D	4	8	4	8	2.18367	4.62643	5.86353	4.32049	7.40656	1.71429	0.777608	0.739051	1
1656D_10323_c0_g1_i1	252	1656C;1656D	3	2	3	2	2.29896	1.62674	2.54601	3.24037	1.85164	0.571429	-0.807355	0.902082	1
1656D_10324_c0_g1_i1	289	1656C;1656D	5	6	5	6	3.03555	3.87876	5.47777	5.40062	5.55492	1.02857	0.040642	1	1
1656D_10325_c0_g1_i1	759	1656C;1656D	27	26	27	26	3.22718	3.14731	26.6173	29.1633	24.0713	0.825397	-0.27684	0.851427	1
1656D_10325_c1_g1_i1	686	1656C;1656D	21	11	21	11	2.96102	1.56811	16.4333	22.6826	10.184	0.44898	-1.15528	0.415814	1
1656D_10326_c0_g1_i1	373	1656C;1656D	1	3	1	3	0.408974	1.28734	1.92879	1.08012	2.77746	2.57143	1.36257	0.808713	1
1656D_10326_c1_g1_i1	565	1656D	0	8	0	8	0	1.59735	3.70328	0	7.40656	-	-	0.0931956	1
1656D_10327_c0_g1_i1	287	1656C;1656D	3	4	3	4	1.84505	2.61402	3.47183	3.24037	3.70328	1.14286	0.192645	1	1
1656D_10328_c0_g1_i1	213	1656C;1656D	2	6	2	6	2.06569	6.51746	3.85758	2.16025	5.55492	2.57143	1.36257	0.59295	1
1656D_10330_c0_g1_i1	300	1656C;1656D	4	5	4	5	2.28806	3.05138	4.4748	4.32049	4.6291	1.07143	0.0995357	1	1
1656D_10333_c0_g1_i1	246	1656C	7	0	7	0	5.57499	0	3.78043	7.56086	0	0	-	0.0727312	1
1656D_10334_c1_g1_i1	228	1656C;1656D	5	1	5	1	4.52975	0.959823	3.16322	5.40062	0.92582	0.171429	-2.54432	0.332471	1
1656D_10337_c0_g1_i1	589	1656C;1656D	17	5	17	5	3.12489	0.925887	11.4956	18.3621	4.6291	0.252101	-1.98793	0.203106	1
1656D_10338_c0_g1_i1	215	1656C	2	0	2	0	2.0239	0	1.08012	2.16025	0	0	-	0.522231	1
1656D_10338_c1_g1_i1	285	1656C;1656D	4	6	4	6	2.48789	3.97073	4.93771	4.32049	5.55492	1.28571	0.36257	0.968366	1
1656D_10339_c0_g1_i1	247	1656C	4	0	4	0	3.16075	0	2.16025	4.32049	0	0	-	0.204074	1
1656D_10339_c1_g1_i1	299	1656C;1656D	2	5	2	5	1.15148	3.06524	3.39467	2.16025	4.6291	2.14286	1.09954	0.721617	1
1656D_10341_c0_g1_i1	669	1656C;1656D	17	6	17	6	2.50073	0.891769	11.9585	18.3621	5.55492	0.302521	-1.72489	0.26121	1
1656D_10342_c1_g1_i1	369	1656C;1656D	4	2	4	2	1.66127	0.874531	3.08607	4.32049	1.85164	0.428571	-1.22239	0.688967	1
1656D_10343_c0_g1_i1	291	1656C;1656D	4	13	4	13	2.39988	8.30434	8.17808	4.32049	12.0357	2.78571	1.47805	0.398613	1
1656D_10344_c0_g1_i1	218	1656C;1656D	2	3	2	3	1.97579	3.10781	2.46885	2.16025	2.77746	1.28571	0.36257	1	1
1656D_10346_c0_g1_i1	230	1656D	0	6	0	6	0	5.69227	2.77746	0	5.55492	-	-	0.155871	1
1656D_10347_c0_g1_i1	206	1656C;1656D	5	3	5	3	5.48018	3.48203	4.08904	5.40062	2.77746	0.514286	-0.959358	0.722412	1
1656D_10347_c1_g1_i1	237	1656C	2	0	2	0	1.69972	0	1.08012	2.16025	0	0	-	0.522231	1
1656D_10348_c0_g1_i1	270	1656D	0	2	0	2	0	1.44461	0.92582	0	1.85164	-	-	0.653038	1
1656D_10348_c1_g1_i1	213	1656D	0	3	0	3	0	3.25873	1.38873	0	2.77746	-	-	0.428162	1
1656D_10349_c0_g1_i1	439	1656C;1656D	6	9	6	9	1.86927	2.87972	7.40656	6.48074	8.33238	1.28571	0.36257	0.911785	1
1656D_1034_c0_g1_i1	202	1656D	0	3	0	3	0	3.59199	1.38873	0	2.77746	-	-	0.428162	1
1656D_10351_c0_g1_i1	264	1656C;1656D	7	2	7	2	4.94494	1.49927	4.70625	7.56086	1.85164	0.244898	-2.02975	0.336922	1
1656D_10352_c0_g1_i1	256	1656C;1656D	2	5	2	5	1.49147	3.95693	3.39467	2.16025	4.6291	2.14286	1.09954	0.721617	1
1656D_10352_c1_g1_i1	205	1656D	0	4	0	4	0	4.67024	1.85164	0	3.70328	-	-	0.295121	1
1656D_10354_c0_g1_i1	727	1656C;1656D	321	420	321	420	41.117	54.4496	367.782	346.72	388.844	1.1215	0.165424	0.840453	1
1656D_10355_c0_g1_i1	203	1656C;1656D	2	7	2	7	2.26112	8.31198	4.32049	2.16025	6.48074	3	1.58496	0.492048	1
1656D_10357_c0_g1_i1	310	1656C	5	0	5	0	2.72959	0	2.70031	5.40062	0	0	-	0.138223	1
1656D_10358_c0_g1_i1	275	1656C;1656D	3	5	3	5	1.98296	3.51184	3.93474	3.24037	4.6291	1.42857	0.514573	0.935572	1
1656D_1035_c0_g1_i1	537	1656C;1656D	67	44	67	44	14.5333	9.64889	56.5522	72.3683	40.7361	0.5629	-0.82905	0.451077	1
1656D_10360_c0_g1_i1	247	1656C;1656D	2	5	2	5	1.58038	4.20865	3.39467	2.16025	4.6291	2.14286	1.09954	0.721617	1
1656D_10363_c0_g1_i1	651	1656C;1656D	15	5	15	5	2.31175	0.777423	10.4155	16.2019	4.6291	0.285714	-1.80735	0.257642	1
1656D_10364_c0_g1_i1	385	1656C;1656D	2	7	2	7	0.778632	2.84584	4.32049	2.16025	6.48074	3	1.58496	0.492048	1
1656D_10364_c1_g1_i1	351	1656C;1656D	2	7	2	7	0.900016	3.33161	4.32049	2.16025	6.48074	3	1.58496	0.492048	1
1656D_10365_c0_g1_i1	229	1656C;1656D	1	6	1	6	0.898942	5.72326	3.31752	1.08012	5.55492	5.14286	2.36257	0.372187	1
1656D_10366_c0_g1_i1	951	1656C;1656D	220	176	220	176	18.706	15.2315	200.286	237.627	162.944	0.685714	-0.544321	0.531023	1
1656D_10367_c0_g1_i1	398	1656C;1656D	4	5	4	5	1.47608	1.91735	4.4748	4.32049	4.6291	1.07143	0.0995357	1	1
1656D_10367_c1_g1_i1	222	1656C;1656D	1	2	1	2	0.951629	2.01804	1.46588	1.08012	1.85164	1.71429	0.777608	1	1
1656D_10368_c0_g1_i1	203	1656C;1656D	1	7	1	7	1.13056	8.31198	3.78043	1.08012	6.48074	6	2.58496	0.298202	1
1656D_10369_c0_g1_i1	289	1656C;1656D	2	7	2	7	1.21422	4.52522	4.32049	2.16025	6.48074	3	1.58496	0.492048	1
1656D_10372_c0_g1_i1	346	1656C;1656D	4	14	4	14	1.84209	6.82452	8.64099	4.32049	12.9615	3	1.58496	0.355727	1
1656D_10373_c0_g2_i1	621	1656C;1656D	27	11	27	11	4.51904	1.85506	19.6737	29.1633	10.184	0.349206	-1.51785	0.263674	1
1656D_10375_c0_g1_i1	223	1656C;1656D	2	4	2	4	1.88405	4.00203	2.93176	2.16025	3.70328	1.71429	0.777608	0.88701	1
1656D_10376_c0_g1_i1	308	1656C;1656D	7	6	7	6	3.85968	3.50577	6.55789	7.56086	5.55492	0.734694	-0.444785	0.881029	1
1656D_1037_c0_g1_i1	210	1656C	6	0	6	0	6.35444	0	3.24037	6.48074	0	0	-	0.0984225	1
1656D_10380_c0_g1_i1	217	1656D	0	7	0	7	0	7.31426	3.24037	0	6.48074	-	-	0.119041	1
1656D_10381_c0_g1_i1	955	1656C;1656D	66	41	66	41	5.57821	3.52727	54.6234	71.2881	37.9586	0.532468	-0.909235	0.411215	1
1656D_10382_c0_g1_i1	207	1656C;1656D	4	3	4	3	4.3435	3.44659	3.54898	4.32049	2.77746	0.642857	-0.63743	0.894145	1
1656D_10383_c0_g1_i1	325	1656C;1656D	5	7	5	7	2.53592	3.77005	5.94068	5.40062	6.48074	1.2	0.263034	0.9921	1
1656D_10384_c0_g1_i1	1634	1656C;1656D	50	89.6717	50	90	2.09595	3.8504	68.665	54.0062	83.3238	1.54286	0.625604	0.557128	1
1656D_10384_c0_g2_i1	626	1656D	0	10.3283	0	10	0	1.71742	4.6291	0	9.2582	-	-	0.0602193	1
1656D_10385_c0_g1_i1	326	1656C;1656D	3	2	3	2	1.51336	1.07258	2.54601	3.24037	1.85164	0.571429	-0.807355	0.902082	1
1656D_10385_c1_g1_i1	467	1656C;1656D	6	7	6	7	1.68212	1.99254	6.48074	6.48074	6.48074	1	0	1	1
1656D_10387_c0_g1_i1	432	1656C;1656D	6	13	6	13	1.92133	4.28724	9.2582	6.48074	12.0357	1.85714	0.893085	0.613009	1
1656D_10389_c0_g1_i1	326	1656C;1656D	7	8	7	8	3.53117	4.29031	7.48371	7.56086	7.40656	0.979592	-0.0297473	1	1
1656D_10390_c0_g1_i1	363	1656C;1656D	6	4	6	4	2.55826	1.79756	5.09201	6.48074	3.70328	0.571429	-0.807355	0.744312	1
1656D_10391_c0_g1_i1	211	1656C	1	0.211871	1	0	1.04719	0.234978	0.540062	1.08012	0	0	-	0.940866	1
1656D_10391_c0_g2_i1	273	1656D	0	2.78813	0	3	0	1.98314	1.38873	0	2.77746	-	-	0.428162	1
1656D_10391_c1_g1_i1	448	1656C;1656D	12	10	12	10	3.61034	3.07732	11.1098	12.9615	9.2582	0.714286	-0.485427	0.79567	1
1656D_10392_c0_g2_i1	316	1656C;1656D	4	8	4	8	2.12213	4.50109	5.86353	4.32049	7.40656	1.71429	0.777608	0.739051	1
1656D_10392_c1_g1_i1	236	1656D	0	3	0	3	0	2.73222	1.38873	0	2.77746	-	-	0.428162	1
1656D_10394_c0_g1_i1	304	1656C;1656D	1	7	1	7	0.561583	4.18627	3.78043	1.08012	6.48074	6	2.58496	0.298202	1
1656D_10395_c0_g1_i1	416	1656C;1656D	5	8	5	8	1.71465	2.82447	6.40359	5.40062	7.40656	1.37143	0.455679	0.882513	1
1656D_10395_c1_g1_i1	470	1656C;1656D	7	5	7	5	1.94093	1.4065	6.09498	7.56086	4.6291	0.612245	-0.707819	0.75953	1
1656D_10396_c0_g1_i1	431	1656C;1656D	8	20	8	20	2.57285	6.6209	13.5787	8.64099	18.5164	2.14286	1.09954	0.46772	1
1656D_10396_c1_g1_i1	435	1656C;1656D	10	7	10	7	3.1647	2.28056	8.64099	10.8012	6.48074	0.6	-0.736966	0.693133	1
1656D_10397_c0_g1_i1	285	1656C;1656D	9	2	9	2	5.59775	1.32358	5.78638	9.72111	1.85164	0.190476	-2.39232	0.223188	1
1656D_10398_c0_g1_i1	297	1656C;1656D	2	4	2	4	1.16152	2.47085	2.93176	2.16025	3.70328	1.71429	0.777608	0.88701	1
1656D_1039_c0_g1_i1	219	1656C;1656D	3	3	3	3	2.94629	3.08859	3.00892	3.24037	2.77746	0.857143	-0.222392	1	1
1656D_10400_c0_g1_i1	242	1656C;1656D	5	4	5	4	4.09594	3.48886	4.55195	5.40062	3.70328	0.685714	-0.544321	0.888737	1
1656D_10401_c0_g1_i1	271	1656C;1656D	5	5	5	5	3.3886	3.60075	5.01486	5.40062	4.6291	0.857143	-0.222392	1	1
1656D_10402_c0_g1_i1	244	1656C;1656D	2	3	2	3	1.61647	2.57572	2.46885	2.16025	2.77746	1.28571	0.36257	1	1
1656D_10404_c0_g1_i1	262	1656C;1656D	3	6	3	6	2.15129	4.56507	4.39765	3.24037	5.55492	1.71429	0.777608	0.793982	1
1656D_10405_c0_g1_i1	232	1656C;1656D	3	6	3	6	2.63504	5.60598	4.39765	3.24037	5.55492	1.71429	0.777608	0.793982	1
1656D_10406_c0_g1_i1	266	1656C;1656D	6	5	6	5	4.18697	3.70498	5.55492	6.48074	4.6291	0.714286	-0.485427	0.884459	1
1656D_10408_c0_g1_i1	402	1656C;1656D	4	8	4	8	1.4511	3.01336	5.86353	4.32049	7.40656	1.71429	0.777608	0.739051	1
1656D_10409_c0_g1_i1	569	1656C;1656D	1	29	1	29	0.195566	5.71544	13.9645	1.08012	26.8488	24.8571	4.63559	0.0139711	0.589041
1656D_10410_c0_g1_i1	1074	1656C;1656D	2	75	2	75	0.143482	5.488	35.7984	2.16025	69.4365	32.1429	5.00643	0.00107438	0.116096
1656D_10411_c0_g1_i1	292	1656C;1656D	7	7	7	7	4.17827	4.44983	7.0208	7.56086	6.48074	0.857143	-0.222392	0.990747	1
1656D_10412_c0_g1_i1	1853	1656C;1656D	2555	2975	2555	2975	92.1264	109.973	2757.02	2759.72	2754.31	0.998043	-0.00282604	0.997667	1
1656D_10412_c1_g1_i1	602	1656C;1656D	10	12	10	12	1.76811	2.13829	10.9555	10.8012	11.1098	1.02857	0.040642	1	1
1656D_10413_c0_g1_i1	828	1656C;1656D	28	38	28	38	2.92129	4.02442	32.7123	30.2435	35.1812	1.16327	0.21818	0.880491	1
1656D_10414_c0_g1_i1	260	1656D	0	2	0	2	0	1.53991	0.92582	0	1.85164	-	-	0.653038	1
1656D_10414_c1_g1_i1	213	1656D	0	2	0	2	0	2.17249	0.92582	0	1.85164	-	-	0.653038	1
1656D_10415_c0_g1_i1	399	1656C;1656D	12	1	12	1	4.40804	0.381712	6.94365	12.9615	0.92582	0.0714286	-3.80735	0.0666762	1
1656D_10416_c0_g1_i1	1732	1656C;1656D	1519	1031	1519	1031	59.3569	41.2847	1297.61	1640.71	954.521	0.581774	-0.78147	0.322023	1
1656D_10418_c0_g1_i1	375	1656C;1656D	2	11	2	11	0.810344	4.67908	6.17213	2.16025	10.184	4.71429	2.23704	0.253151	1
1656D_10419_c0_g1_i1	516	1656D	0	7	0	7	0	1.65177	3.24037	0	6.48074	-	-	0.119041	1
1656D_10419_c1_g1_i1	253	1656C;1656D	1	4	1	4	0.761372	3.23334	2.3917	1.08012	3.70328	3.42857	1.77761	0.612428	1
1656D_10420_c0_g1_i1	1043	1656C;1656D	55	747	55	747	4.10752	56.8775	375.497	59.4068	691.588	11.6416	3.54121	7.28366e-05	0.0163369
1656D_10424_c0_g1_i1	235	1656C;1656D	3	4	3	4	2.5811	3.65599	3.47183	3.24037	3.70328	1.14286	0.192645	1	1
1656D_10425_c0_g1_i1	323	1656C;1656D	9	1	9	1	4.61403	0.542723	5.32347	9.72111	0.92582	0.0952381	-3.39232	0.12172	1
1656D_10425_c1_g1_i1	497	1656C;1656D	5	6	5	6	1.25284	1.51809	5.47777	5.40062	5.55492	1.02857	0.040642	1	1
1656D_10426_c0_g1_i1	226	1656C;1656D	2	1	2	1	1.83748	0.973985	1.54303	2.16025	0.92582	0.428571	-1.22239	0.915332	1
1656D_10426_c1_g1_i1	239	1656C;1656D	3	1	3	1	2.50925	0.891419	2.0831	3.24037	0.92582	0.285714	-1.80735	0.635182	1
1656D_10427_c0_g1_i1	636	1656C;1656D	7	5	7	5	1.12406	0.808721	6.09498	7.56086	4.6291	0.612245	-0.707819	0.75953	1
1656D_10427_c1_g1_i1	307	1656C;1656D	4	3	4	3	2.21718	1.76018	3.54898	4.32049	2.77746	0.642857	-0.63743	0.894145	1
1656D_10428_c0_g1_i1	208	1656C;1656D	3	2	3	2	3.23608	2.27607	2.54601	3.24037	1.85164	0.571429	-0.807355	0.902082	1
1656D_10428_c1_g1_i1	251	1656D	0	3	0	3	0	2.45703	1.38873	0	2.77746	-	-	0.428162	1
1656D_10429_c0_g1_i1	255	1656C;1656D	1	6	1	6	0.751318	4.78245	3.31752	1.08012	5.55492	5.14286	2.36257	0.372187	1
1656D_10430_c0_g1_i1	263	1656C;1656D	4	3	4	3	2.84806	2.26605	3.54898	4.32049	2.77746	0.642857	-0.63743	0.894145	1
1656D_10431_c0_g1_i1	602	1656C;1656D	11	6	11	6	1.94492	1.06914	8.71814	11.8814	5.55492	0.467532	-1.09686	0.524716	1
1656D_10431_c1_g1_i1	335	1656C;1656D	2	3	2	3	0.967501	1.53868	2.46885	2.16025	2.77746	1.28571	0.36257	1	1
1656D_10432_c0_g1_i1	932	1656C;1656D	141	216	141	216	12.3419	19.2368	176.137	152.297	199.977	1.31307	0.392944	0.659507	1
1656D_10433_c0_g1_i1	277	1656D	0	16.1059	0	16	0	11.1537	7.40656	0	14.8131	-	-	0.0209804	0.717393
1656D_10434_c0_g1_i1	405	1656C;1656D	14	2	14	2	5.01439	0.742114	8.48668	15.1217	1.85164	0.122449	-3.02975	0.0938925	1
1656D_10435_c0_g1_i1	215	1656D	0	5	0	5	0	5.34126	2.31455	0	4.6291	-	-	0.210896	1
1656D_10435_c1_g1_i1	296	1656C;1656D	1	8	1	8	0.583975	4.97099	4.24334	1.08012	7.40656	6.85714	2.77761	0.242454	1
1656D_10436_c0_g1_i1	986	1656C;1656D	18	27	18	27	1.45388	2.22148	22.2197	19.4422	24.9971	1.28571	0.36257	0.80927	1
1656D_10436_c1_g1_i1	868	1656C;1656D	27	19	27	19	2.62361	1.87585	23.377	29.1633	17.5906	0.603175	-0.729352	0.585051	1
1656D_10437_c0_g1_i1	239	1656C;1656D	2	4	2	4	1.67283	3.56568	2.93176	2.16025	3.70328	1.71429	0.777608	0.88701	1
1656D_10439_c0_g1_i1	1063	1656C;1656D	699.363	3042.3	699	3042	50.8841	225.737	1785.68	755.006	2816.34	3.73023	1.89926	0.0211232	0.717393
1656D_10439_c0_g2_i1	773	1656C;1656D	92.637	107.704	93	108	10.7559	12.6725	100.22	100.451	99.9886	0.995392	-0.00666373	1	1
1656D_10440_c0_g1_i1	712	1656C;1656D	258	500	258	500	34.1937	67.0619	370.791	278.672	462.91	1.66113	0.732165	0.365972	1
1656D_10441_c1_g1_i1	239	1656C;1656D	9	1	9	1	7.52774	0.891419	5.32347	9.72111	0.92582	0.0952381	-3.39232	0.12172	1
1656D_10442_c0_g1_i1	255	1656C;1656D	2	8	2	8	1.50264	6.37659	4.7834	2.16025	7.40656	3.42857	1.77761	0.412	1
1656D_10446_c0_g1_i1	278	1656C;1656D	1	8	1	8	0.648736	5.49761	4.24334	1.08012	7.40656	6.85714	2.77761	0.242454	1
1656D_10446_c1_g1_i1	249	1656C;1656D	1	2	1	2	0.783052	1.65951	1.46588	1.08012	1.85164	1.71429	0.777608	1	1
1656D_10447_c0_g1_i1	2881	1656C;1656D	164	202	164	202	3.57006	4.51733	182.078	177.14	187.016	1.05575	0.0782671	0.935504	1
1656D_10448_c0_g1_i1	371	1656C;1656D	9	3	9	3	3.70836	1.29911	6.24929	9.72111	2.77746	0.285714	-1.80735	0.335959	1
1656D_10449_c0_g1_i1	302	1656C;1656D	8	2	8	2	4.53405	1.20898	5.24631	8.64099	1.85164	0.214286	-2.22239	0.2727	1
1656D_1044_c0_g1_i1	205	1656D	0	4	0	4	0	4.67024	1.85164	0	3.70328	-	-	0.295121	1
1656D_10451_c0_g1_i1	441	1656C;1656D	5	8	5	8	1.54505	2.53795	6.40359	5.40062	7.40656	1.37143	0.455679	0.882513	1
1656D_10452_c0_g1_i1	226	1656C;1656D	5	4	5	4	4.59369	3.89594	4.55195	5.40062	3.70328	0.685714	-0.544321	0.888737	1
1656D_10453_c0_g1_i1	805	1656C;1656D	58	64	58	64	6.31914	7.07264	60.9498	62.6472	59.2525	0.945813	-0.0803734	0.956659	1
1656D_10454_c0_g1_i1	356	1656C;1656D	38	28	38	28	16.7278	13.0007	33.4838	41.0447	25.923	0.631579	-0.662965	0.590991	1
1656D_10455_c0_g1_i1	321	1656C;1656D	4	4	4	4	2.07281	2.1913	4.01189	4.32049	3.70328	0.857143	-0.222392	1	1
1656D_10456_c0_g1_i1	246	1656C;1656D	5	3	5	3	3.98213	2.53496	4.08904	5.40062	2.77746	0.514286	-0.959358	0.722412	1
1656D_10457_c0_g1_i1	270	1656C;1656D	4	5	4	5	2.72704	3.61152	4.4748	4.32049	4.6291	1.07143	0.0995357	1	1
1656D_10458_c0_g1_i1	265	1656C;1656D	4	6	4	6	2.80603	4.4704	4.93771	4.32049	5.55492	1.28571	0.36257	0.968366	1
1656D_10459_c0_g1_i1	220	1656C	24	0	24	0	23.3095	0	12.9615	25.923	0	0	-	0.00308863	0.237395
1656D_1045_c0_g1_i1	211	1656D	0	6	0	6	0	6.65435	2.77746	0	5.55492	-	-	0.155871	1
1656D_10461_c0_g1_i1	1414	1656C;1656D	30	56	30	56	1.50302	2.87053	42.1248	32.4037	51.8459	1.6	0.678072	0.564926	1
1656D_10465_c0_g1_i1	400	1656C;1656D	1	28	1	28	0.365758	10.6429	13.5015	1.08012	25.923	24	4.58496	0.0154896	0.61638
1656D_10466_c0_g1_i1	576	1656C;1656D	32	12.0277	32	12	6.11919	2.31952	22.8369	34.564	11.1098	0.321429	-1.63743	0.214064	1
1656D_10467_c0_g1_i1	270	1656C;1656D	2	2	2	2	1.36352	1.44461	2.00594	2.16025	1.85164	0.857143	-0.222392	1	1
1656D_10467_c1_g1_i1	225	1656C;1656D	4	1	4	1	3.7062	0.982855	2.62316	4.32049	0.92582	0.214286	-2.22239	0.452547	1
1656D_10468_c0_g1_i1	497	1656C;1656D	19	7	19	7	4.76081	1.7711	13.5015	20.5223	6.48074	0.315789	-1.66297	0.263127	1
1656D_10469_c0_g1_i1	1176	1656C;1656D	28	40	28	40	1.77831	2.59422	33.6381	30.2435	37.0328	1.22449	0.292181	0.82875	1
1656D_10469_c1_g1_i1	867	1656C;1656D	21	14	21	14	2.04411	1.38455	17.822	22.6826	12.9615	0.571429	-0.807355	0.570264	1
1656D_1046_c0_g1_i1	235	1656C	9	0	9	0	7.74331	0	4.86056	9.72111	0	0	-	0.0428041	0.945471
1656D_10470_c0_g1_i1	232	1656C;1656D	4	6	4	6	3.51339	5.60598	4.93771	4.32049	5.55492	1.28571	0.36257	0.968366	1
1656D_10472_c0_g1_i1	1747	1656C;1656D	2205	1745	2205	1745	85.2781	69.1619	1998.61	2381.67	1615.56	0.678328	-0.559944	0.487393	1
1656D_10473_c0_g1_i1	285	1656C;1656D	6	4	6	4	3.73183	2.64715	5.09201	6.48074	3.70328	0.571429	-0.807355	0.744312	1
1656D_10474_c0_g2_i1	528	1656C;1656D	36	165	36	165	8.058	37.3328	95.8224	38.8844	152.76	3.92857	1.974	0.052119	1
1656D_10475_c0_g1_i1	876	1656C;1656D	390	317	390	317	37.3821	30.878	357.367	421.248	293.485	0.696703	-0.521384	0.520438	1
1656D_10476_c0_g1_i1	249	1656C;1656D	6	9	6	9	4.69831	7.46781	7.40656	6.48074	8.33238	1.28571	0.36257	0.911785	1
1656D_10478_c0_g1_i1	260	1656C;1656D	5	4	5	4	3.63271	3.07982	4.55195	5.40062	3.70328	0.685714	-0.544321	0.888737	1
1656D_10479_c0_g1_i1	248	1656C	4	0	4	0	3.14723	0	2.16025	4.32049	0	0	-	0.204074	1
1656D_10479_c1_g1_i1	311	1656C;1656D	4	5	4	5	2.17345	2.87655	4.4748	4.32049	4.6291	1.07143	0.0995357	1	1
1656D_10483_c0_g1_i1	457	1656C;1656D	5	8	5	8	1.45453	2.375	6.40359	5.40062	7.40656	1.37143	0.455679	0.882513	1
1656D_10485_c0_g1_i1	243	1656C;1656D	1	7	1	7	0.813578	6.06239	3.78043	1.08012	6.48074	6	2.58496	0.298202	1
1656D_10486_c0_g1_i1	236	1656C;1656D	6	5	6	5	5.13319	4.55369	5.55492	6.48074	4.6291	0.714286	-0.485427	0.884459	1
1656D_10487_c0_g1_i1	570	1656C;1656D	6.08464	8.70123	6	9	1.18645	1.70926	7.40656	6.48074	8.33238	1.28571	0.36257	0.911785	1
1656D_10487_c0_g2_i1	1305	1656C;1656D	29.9154	51.2988	30	51	1.65924	2.90883	39.8103	32.4037	47.2168	1.45714	0.543142	0.652533	1
1656D_10488_c0_g1_i1	245	1656D	0	5	0	5	0	4.2621	2.31455	0	4.6291	-	-	0.210896	1
1656D_10489_c0_g1_i1	219	1656C;1656D	6	3	6	3	5.89258	3.08859	4.6291	6.48074	2.77746	0.428571	-1.22239	0.58886	1
1656D_10490_c0_g1_i1	210	1656C;1656D	3	2	3	2	3.17722	2.23738	2.54601	3.24037	1.85164	0.571429	-0.807355	0.902082	1
1656D_10491_c0_g1_i1	337	1656C;1656D	5	8	5	8	2.39868	4.06469	6.40359	5.40062	7.40656	1.37143	0.455679	0.882513	1
1656D_10492_c0_g1_i1	303	1656C;1656D	2	1	2	1	1.12783	0.601492	1.54303	2.16025	0.92582	0.428571	-1.22239	0.915332	1
1656D_10492_c1_g1_i1	253	1656C	5	0	5	0	3.80686	0	2.70031	5.40062	0	0	-	0.138223	1
1656D_10493_c0_g1_i1	247	1656C;1656D	12	10	12	10	9.48226	8.41729	11.1098	12.9615	9.2582	0.714286	-0.485427	0.79567	1
1656D_10495_c0_g1_i1	434	1656C;1656D	12	4	12	4	3.80948	1.30865	8.33238	12.9615	3.70328	0.285714	-1.80735	0.288853	1
1656D_10495_c1_g1_i1	335	1656C	4	0	4	0	1.935	0	2.16025	4.32049	0	0	-	0.204074	1
1656D_10496_c0_g1_i1	1368	1656C;1656D	15	25	15	25	0.783486	1.3356	19.6737	16.2019	23.1455	1.42857	0.514573	0.726289	1
1656D_10496_c1_g1_i1	307	1656C;1656D	3	1	3	1	1.66289	0.586726	2.0831	3.24037	0.92582	0.285714	-1.80735	0.635182	1
1656D_10497_c0_g1_i1	320	1656D	0	12	0	12	0	6.6144	5.55492	0	11.1098	-	-	0.0408295	0.945471
1656D_10498_c0_g1_i1	608	1656C;1656D	14	23	14	23	2.43285	4.02605	18.2078	15.1217	21.2939	1.40816	0.493815	0.745306	1
1656D_10499_c0_g1_i1	1517	1656C;1656D	45	97	45	97	2.06576	4.5586	69.2051	48.6056	89.8045	1.84762	0.885667	0.402693	1
1656D_10499_c1_g1_i1	449	1656C;1656D	9	8	9	8	2.69789	2.45392	8.56384	9.72111	7.40656	0.761905	-0.392317	0.87572	1
1656D_10500_c0_g2_i1	1032	1656C;1656D	19.6748	51.6135	20	52	1.49105	3.9873	34.8726	21.6025	48.1426	2.22857	1.15612	0.339406	1
1656D_10502_c0_g1_i1	1274	1656C;1656D	795	1228	795	1228	45.4789	71.8008	997.803	858.698	1136.91	1.32399	0.404891	0.604752	1
1656D_10503_c0_g1_i1	220	1656C;1656D	4	4	4	4	3.88492	4.08783	4.01189	4.32049	3.70328	0.857143	-0.222392	1	1
1656D_10505_c0_g1_i1	206	1656C	6	0	6	0	6.57622	0	3.24037	6.48074	0	0	-	0.0984225	1
1656D_10506_c0_g1_i1	538	1656C;1656D	1	8	1	8	0.216263	1.74865	4.24334	1.08012	7.40656	6.85714	2.77761	0.242454	1
1656D_10506_c1_g1_i1	291	1656D	0	9	0	9	0	5.74916	4.16619	0	8.33238	-	-	0.0743623	1
1656D_10507_c0_g1_i1	720	1656C;1656D	108.882	173.472	109	173	14.1661	22.8455	138.95	117.733	160.167	1.36042	0.444051	0.632592	1
1656D_10507_c0_g2_i1	209	1656D	0	1.02387	0	1	0	1.15578	0.46291	0	0.92582	-	-	1	1
1656D_10507_c0_g3_i1	923	1656C;1656D	202.118	270.504	202	271	17.9419	24.4273	234.541	218.185	250.897	1.14993	0.201545	0.815788	1
1656D_1050_c0_g1_i1	242	1656C;1656D	4	4	4	4	3.27675	3.48886	4.01189	4.32049	3.70328	0.857143	-0.222392	1	1
1656D_10510_c0_g1_i1	573	1656C;1656D	13	2	13	2	2.51066	0.38937	7.94662	14.0416	1.85164	0.131868	-2.92283	0.110036	1
1656D_10510_c1_g1_i1	366	1656C;1656D	4	2	4	2	1.68239	0.88563	3.08607	4.32049	1.85164	0.428571	-1.22239	0.688967	1
1656D_10511_c0_g1_i1	692	1656C;1656D	15	21	15	21	2.08442	2.95089	17.822	16.2019	19.4422	1.2	0.263034	0.886857	1
1656D_10513_c0_g1_i1	2274	1656C;1656D	1062	1350	1062	1350	30.1801	39.3743	1198.47	1147.09	1249.86	1.08959	0.123783	0.875465	1
1656D_10515_c0_g1_i1	261	1656C;1656D	11	1	11	1	7.94137	0.764179	6.40359	11.8814	0.92582	0.0779221	-3.68182	0.0805832	1
1656D_10516_c0_g1_i1	1504	1656C;1656D	153	242	153	242	7.09861	11.4937	194.654	165.259	224.048	1.35574	0.439083	0.616095	1
1656D_10517_c0_g1_i1	558	1656C;1656D	8	6	8	6	1.61974	1.22547	7.09795	8.64099	5.55492	0.642857	-0.63743	0.770856	1
1656D_10518_c0_g1_i1	1066	1656C;1656D	612	568	612	568	44.3563	41.9848	593.451	661.036	525.866	0.795518	-0.330033	0.675153	1
1656D_10518_c1_g3_i1	274	1656C;1656D	4	8	4	8	2.66194	5.6549	5.86353	4.32049	7.40656	1.71429	0.777608	0.739051	1
1656D_10520_c0_g1_i1	1094	1656C;1656D	981	1065	981	1065	68.6341	76.0179	1022.8	1059.6	985.998	0.930537	-0.103864	0.895175	1
1656D_10521_c0_g1_i1	373	1656C;1656D	2	6	2	6	0.817948	2.57468	3.85758	2.16025	5.55492	2.57143	1.36257	0.59295	1
1656D_10521_c1_g1_i1	614	1656C;1656D	2	14	2	14	0.341523	2.40816	7.56086	2.16025	12.9615	6	2.58496	0.164839	1
1656D_10524_c0_g1_i1	824	1656C;1656D	18	14	18	14	1.89195	1.49355	16.2019	19.4422	12.9615	0.666667	-0.584963	0.701144	1
1656D_10526_c0_g1_i1	281	1656C;1656D	9	1	9	1	5.72734	0.67777	5.32347	9.72111	0.92582	0.0952381	-3.39232	0.12172	1
1656D_10529_c0_g1_i1	250	1656C;1656D	8	2	8	2	6.22728	1.64833	5.24631	8.64099	1.85164	0.214286	-2.22239	0.2727	1
1656D_10530_c0_g1_i1	268	1656C;1656D	2	6	2	6	1.3814	4.38656	3.85758	2.16025	5.55492	2.57143	1.36257	0.59295	1
1656D_10531_c0_g1_i1	644	1656C;1656D	24	19	24	19	3.76931	3.00838	21.7568	25.923	17.5906	0.678571	-0.559427	0.689054	1
1656D_10531_c1_g1_i1	917	1656C;1656D	24	29	24	29	2.15076	2.6434	26.3859	25.923	26.8488	1.03571	0.0506261	1	1
1656D_10532_c0_g1_i1	905	1656D	0	17.9837	0	18	0	1.67064	8.33238	0	16.6648	-	-	0.015644	0.61638
1656D_10532_c0_g2_i1	2302	1656C;1656D	1124	646.016	1124	646	31.4982	18.581	906.069	1214.06	598.08	0.492628	-1.02143	0.193867	1
1656D_10533_c1_g1_i1	396	1656C;1656D	4	3	4	3	1.48774	1.16113	3.54898	4.32049	2.77746	0.642857	-0.63743	0.894145	1
1656D_10535_c0_g1_i1	633	1656C;1656D	25	28	25	28	4.04657	4.56645	26.463	27.0031	25.923	0.96	-0.0588937	0.997121	1
1656D_10536_c0_g1_i1	824	1656C;1656D	7	35	7	35	0.735759	3.73388	19.9823	7.56086	32.4037	4.28571	2.09954	0.131663	1
1656D_10537_c0_g2_i1	1543	1656C;1656D	77	114	77	114	3.46159	5.24736	94.3565	83.1695	105.543	1.26902	0.343711	0.734758	1
1656D_10538_c0_g1_i1	287	1656C;1656D	7	2	7	2	4.30511	1.30701	4.70625	7.56086	1.85164	0.244898	-2.02975	0.336922	1
1656D_10539_c0_g1_i1	340	1656D	0	6	0	6	0	3.00549	2.77746	0	5.55492	-	-	0.155871	1
1656D_10539_c1_g1_i1	238	1656C;1656D	1	3	1	3	0.8434	2.69311	1.92879	1.08012	2.77746	2.57143	1.36257	0.808713	1
1656D_1053_c0_g1_i1	575	1656C;1656D	24	3	24	3	4.60358	0.580348	14.3502	25.923	2.77746	0.107143	-3.22239	0.0428513	0.946152
1656D_10540_c0_g1_i1	547	1656C;1656D	50	42	50	42	10.4963	8.89886	46.4453	54.0062	38.8844	0.72	-0.473931	0.685646	1
1656D_10542_c0_g1_i1	272	1656C;1656D	1	18	1	18	0.673727	12.8911	8.87244	1.08012	16.6648	15.4286	3.94753	0.0494701	1
1656D_10543_c0_g1_i1	213	1656C;1656D	2	4	2	4	2.06569	4.34497	2.93176	2.16025	3.70328	1.71429	0.777608	0.88701	1
1656D_10544_c0_g1_i1	227	1656C;1656D	4	6	4	6	3.65329	5.79641	4.93771	4.32049	5.55492	1.28571	0.36257	0.968366	1
1656D_10545_c0_g1_i1	1740	1656C;1656D	1175	975	1175	975	45.6619	38.8286	1085.91	1269.15	902.675	0.711246	-0.491579	0.530119	1
1656D_10546_c0_g1_i1	1558	1656C;1656D	88	167	88	167	3.90942	7.59679	124.831	95.0509	154.612	1.62662	0.70188	0.456346	1
1656D_10547_c0_g1_i1	2972	1656C;1656D	3726	5135	3726	5135	78.3612	110.954	4389.31	4024.54	4754.09	1.18127	0.240344	0.784156	1
1656D_10547_c1_g1_i1	2413	1656C;1656D	150	175	150	175	3.98404	4.77166	162.019	162.019	162.019	1	-3.20343e-16	1	1
1656D_10548_c0_g2_i1	1769	1656C;1656D	532	781	532	781	20.2696	30.4975	648.846	574.626	723.065	1.25832	0.331504	0.673096	1
1656D_10549_c0_g1_i1	399	1656C;1656D	11	26	11	26	4.0407	9.92451	17.9763	11.8814	24.0713	2.02597	1.01862	0.469576	1
1656D_10549_c1_g1_i1	221	1656C;1656D	1	1	1	1	0.961738	1.01621	1.00297	1.08012	0.92582	0.857143	-0.222392	1	1
1656D_1054_c0_g1_i1	302	1656C;1656D	5	12	5	12	2.83378	7.2539	8.25523	5.40062	11.1098	2.05714	1.04064	0.563909	1
1656D_10550_c0_g1_i1	1656	1656C;1656D	117	68	117	68	4.82571	2.8732	94.6651	126.374	62.9558	0.498168	-1.00529	0.310766	1
1656D_10551_c0_g1_i1	1878	1656C;1656D	168	196	168	196	5.96245	7.13202	181.461	181.461	181.461	1	0	1	1
1656D_10552_c0_g1_i1	1748	1656C;1656D	130435	85715.9	130435	85716	5041.1	3394.98	110122	140886	79357.6	0.563276	-0.828087	0.806809	1
1656D_10553_c0_g1_i1	721	1656C;1656D	7	9	7	9	0.908636	1.18258	7.94662	7.56086	8.33238	1.10204	0.140178	1	1
1656D_10553_c1_g1_i1	209	1656C;1656D	3	1	3	1	3.20118	1.12884	2.0831	3.24037	0.92582	0.285714	-1.80735	0.635182	1
1656D_10554_c0_g1_i1	2956	1656C;1656D	19436	18118	19436	18118	411.207	393.822	18883.6	20993.3	16774	0.799018	-0.3237	0.790817	1
1656D_10557_c0_g1_i1	222	1656C;1656D	5	2	5	2	4.75815	2.01804	3.62613	5.40062	1.85164	0.342857	-1.54432	0.534519	1
1656D_10558_c0_g1_i1	1705	1656C;1656D	7499	3634	7499	3634	298.612	148.272	5732.14	8099.85	3364.43	0.41537	-1.26753	0.171162	1
1656D_10559_c0_g1_i1	273	1656C;1656D	8	7	8	7	5.35824	4.97896	7.56086	8.64099	6.48074	0.75	-0.415037	0.878186	1
1656D_10560_c0_g1_i1	889	1656C;1656D	346	360	346	360	32.4486	34.3197	353.509	373.723	333.295	0.891825	-0.165168	0.841078	1
1656D_10561_c0_g1_i1	607	1656C;1656D	53	21	53	21	9.23759	3.68705	38.3444	57.2465	19.4422	0.339623	-1.558	0.18979	1
1656D_10562_c0_g1_i1	919	1656C;1656D	3514	2921	3514	2921	313.911	265.422	3249.94	3795.55	2704.32	0.712497	-0.489044	0.562346	1
1656D_10565_c0_g1_i1	280	1656C	2	0	2	0	1.28178	0	1.08012	2.16025	0	0	-	0.522231	1
1656D_10565_c1_g1_i1	273	1656C;1656D	2	4	2	4	1.33956	2.84512	2.93176	2.16025	3.70328	1.71429	0.777608	0.88701	1
1656D_10569_c0_g1_i1	560	1656C;1656D	15	9	15	9	3.01785	1.82614	12.2671	16.2019	8.33238	0.514286	-0.959358	0.538716	1
1656D_10569_c1_g1_i1	313	1656C;1656D	2	2	2	2	1.07385	1.14165	2.00594	2.16025	1.85164	0.857143	-0.222392	1	1
1656D_1056_c0_g1_i1	242	1656C;1656D	6	5	6	5	4.91513	4.36108	5.55492	6.48074	4.6291	0.714286	-0.485427	0.884459	1
1656D_10572_c0_g2_i1	912	1656C;1656D	105	60	105	60	9.48484	5.51227	84.4811	113.413	55.5492	0.489796	-1.02975	0.310001	1
1656D_10573_c0_g1_i1	346	1656C;1656D	6	8	6	8	2.76313	3.89973	6.94365	6.48074	7.40656	1.14286	0.192645	1	1
1656D_10574_c0_g1_i1	340	1656C;1656D	6	4	6	4	2.84082	2.00366	5.09201	6.48074	3.70328	0.571429	-0.807355	0.744312	1
1656D_10575_c0_g1_i1	4969	1656C;1656D	359.701	233.924	360	234	4.33834	2.90243	302.743	388.844	216.642	0.557143	-0.843881	0.306332	1
1656D_10575_c0_g2_i1	1147	1656C;1656D	16.2992	14.0765	16	14	1.07008	0.943427	15.1217	17.282	12.9615	0.75	-0.415037	0.806103	1
1656D_10576_c0_g1_i1	422	1656C;1656D	17	12	17	12	5.68241	4.12777	14.736	18.3621	11.1098	0.605042	-0.724893	0.634011	1
1656D_10577_c0_g1_i1	234	1656C;1656D	4	3	4	3	3.46364	2.7658	3.54898	4.32049	2.77746	0.642857	-0.63743	0.894145	1
1656D_10577_c1_g1_i1	603	1656C;1656D	9	7	9	7	1.58729	1.24353	8.10093	9.72111	6.48074	0.666667	-0.584963	0.779495	1
1656D_10578_c0_g1_i1	1501	1656C;1656D	253	291	253	291	11.7672	13.8548	271.342	273.271	269.414	0.985884	-0.0205107	0.985208	1
1656D_10579_c0_g1_i1	251	1656C	7	0	7	0	5.40806	0	3.78043	7.56086	0	0	-	0.0727312	1
1656D_10580_c0_g1_i1	1546	1656C;1656D	104	125	104	125	4.66425	5.74006	114.03	112.333	115.728	1.03022	0.0429521	0.974368	1
1656D_10580_c1_g1_i1	226	1656C;1656D	1	3	1	3	0.918738	2.92195	1.92879	1.08012	2.77746	2.57143	1.36257	0.808713	1
1656D_10581_c0_g1_i1	412	1656C;1656D	5	8	5	8	1.74151	2.87355	6.40359	5.40062	7.40656	1.37143	0.455679	0.882513	1
1656D_10583_c0_g1_i1	833	1656C;1656D	1261	1289	1261	1289	130.358	135.295	1277.71	1362.04	1193.38	0.876175	-0.190708	0.808646	1
1656D_10584_c0_g1_i1	223	1656C;1656D	4	3	4	3	3.7681	3.00152	3.54898	4.32049	2.77746	0.642857	-0.63743	0.894145	1
1656D_10585_c0_g1_i1	296	1656C;1656D	5	2	5	2	2.91988	1.24275	3.62613	5.40062	1.85164	0.342857	-1.54432	0.534519	1
1656D_10586_c0_g1_i1	257	1656C;1656D	5	1	5	1	3.71095	0.785281	3.16322	5.40062	0.92582	0.171429	-2.54432	0.332471	1
1656D_10587_c0_g1_i1	425	1656C;1656D	8	6	8	6	2.64039	2.03892	7.09795	8.64099	5.55492	0.642857	-0.63743	0.770856	1
1656D_10589_c0_g1_i1	1278	1656C;1656D	85	114	85	114	4.8429	6.63886	98.677	91.8105	105.543	1.14958	0.201107	0.84616	1
1656D_10590_c0_g1_i1	265	1656C;1656D	5	4	5	4	3.50754	2.98026	4.55195	5.40062	3.70328	0.685714	-0.544321	0.888737	1
1656D_10593_c0_g1_i1	276	1656C;1656D	6	4	6	4	3.94472	2.78963	5.09201	6.48074	3.70328	0.571429	-0.807355	0.744312	1
1656D_10594_c0_g1_i1	465	1656C;1656D	3	4	3	4	0.847092	1.14752	3.47183	3.24037	3.70328	1.14286	0.192645	1	1
1656D_10594_c1_g1_i1	265	1656C;1656D	1	3	1	3	0.701508	2.2352	1.92879	1.08012	2.77746	2.57143	1.36257	0.808713	1
1656D_10595_c0_g1_i1	226	1656D	0	3	0	3	0	2.92195	1.38873	0	2.77746	-	-	0.428162	1
1656D_10596_c0_g1_i1	238	1656C;1656D	4	5	4	5	3.3736	4.48852	4.4748	4.32049	4.6291	1.07143	0.0995357	1	1
1656D_10597_c0_g1_i1	608	1656C;1656D	25	23	25	23	4.34438	4.02605	24.1485	27.0031	21.2939	0.788571	-0.342687	0.814826	1
1656D_10598_c0_g1_i1	248	1656D	0	7	0	7	0	5.84256	3.24037	0	6.48074	-	-	0.119041	1
1656D_1059_c0_g1_i1	463	1656C;1656D	2	9	2	9	0.569188	2.604	5.24631	2.16025	8.33238	3.85714	1.94753	0.347706	1
1656D_1059_c1_g1_i1	213	1656D	0	2	0	2	0	2.17249	0.92582	0	1.85164	-	-	0.653038	1
1656D_10601_c0_g1_i1	1800	1656C;1656D	85	113	85	113	3.17222	4.32265	98.2141	91.8105	104.618	1.1395	0.188396	0.856708	1
1656D_10602_c0_g1_i1	327	1656C;1656D	8	6	8	6	4.01525	3.20317	7.09795	8.64099	5.55492	0.642857	-0.63743	0.770856	1
1656D_10603_c0_g1_i1	2993	1656C;1656D	289	110	289	110	6.03077	2.35843	206.998	312.156	101.84	0.326248	-1.61596	0.0656032	1
1656D_10604_c0_g1_i1	229	1656C;1656D	1	2	1	2	0.898942	1.90775	1.46588	1.08012	1.85164	1.71429	0.777608	1	1
1656D_10604_c1_g1_i1	203	1656D	0	1	0	1	0	1.18743	0.46291	0	0.92582	-	-	1	1
1656D_10605_c0_g1_i1	2191	1656C;1656D	303	454	303	454	8.98604	13.8161	373.8	327.277	420.322	1.2843	0.360982	0.656028	1
1656D_10606_c0_g1_i1	321	1656C;1656D	6	2	6	2	3.10921	1.09565	4.16619	6.48074	1.85164	0.285714	-1.80735	0.421356	1
1656D_10607_c1_g1_i1	230	1656C;1656D	3	4	3	4	2.67324	3.79485	3.47183	3.24037	3.70328	1.14286	0.192645	1	1
1656D_10608_c0_g2_i1	1914	1656C;1656D	51	105	51	105	1.76998	3.73662	76.1487	55.0863	97.2111	1.76471	0.819428	0.430014	1
1656D_10608_c1_g1_i1	288	1656C;1656D	1	5	1	5	0.610752	3.25126	2.85461	1.08012	4.6291	4.28571	2.09954	0.472704	1
1656D_10609_c0_g1_i1	403	1656C;1656D	6	9	6	9	2.16744	3.37405	7.40656	6.48074	8.33238	1.28571	0.36257	0.911785	1
1656D_1060_c0_g1_i1	351	1656C;1656D	7	10	7	10	3.15006	4.75945	8.40953	7.56086	9.2582	1.22449	0.292181	0.935151	1
1656D_10610_c0_g1_i1	295	1656D	0	5	0	5	0	3.11951	2.31455	0	4.6291	-	-	0.210896	1
1656D_10610_c1_g1_i1	1029	1656C;1656D	963	580	963	580	73.2757	44.9859	788.567	1040.16	536.976	0.516244	-0.953875	0.224566	1
1656D_10611_c0_g1_i1	262	1656C;1656D	3	3	3	3	2.15129	2.28253	3.00892	3.24037	2.77746	0.857143	-0.222392	1	1
1656D_10613_c0_g1_i1	444	1656C;1656D	1	6	1	6	0.305512	1.87949	3.31752	1.08012	5.55492	5.14286	2.36257	0.372187	1
1656D_10614_c0_g1_i1	251	1656C;1656D	7	6	7	6	5.40806	4.91405	6.55789	7.56086	5.55492	0.734694	-0.444785	0.881029	1
1656D_10615_c0_g1_i1	335	1656C;1656D	2.24459	1.2953	2	1	1.08582	0.66435	1.54303	2.16025	0.92582	0.428571	-1.22239	0.915332	1
1656D_10615_c0_g2_i1	233	1656C;1656D	0.75541	1.7047	1	2	0.659045	1.5854	1.46588	1.08012	1.85164	1.71429	0.777608	1	1
1656D_10615_c1_g1_i1	315	1656D	0	4	0	4	0	2.26239	1.85164	0	3.70328	-	-	0.295121	1
1656D_10616_c0_g1_i1	210	1656C;1656D	4	3	4	3	4.23629	3.35608	3.54898	4.32049	2.77746	0.642857	-0.63743	0.894145	1
1656D_10617_c0_g1_i1	261	1656C	15	0	15	0	10.8291	0	8.10093	16.2019	0	0	-	0.0123858	0.546446
1656D_10618_c0_g1_i1	1058	1656C;1656D	5790	6774	5790	6774	423.999	505.853	6262.71	6253.91	6271.51	1.00281	0.00405222	0.996833	1
1656D_10619_c0_g1_i1	316	1656D	0	5	0	5	0	2.81318	2.31455	0	4.6291	-	-	0.210896	1
1656D_1061_c0_g1_i1	268	1656C;1656D	3	5	3	5	2.0721	3.65546	3.93474	3.24037	4.6291	1.42857	0.514573	0.935572	1
1656D_10620_c0_g1_i1	257	1656C	8	0	8	0	5.93752	0	4.32049	8.64099	0	0	-	0.0552302	1
1656D_10621_c0_g1_i1	290	1656C;1656D	3	5	3	5	1.80955	3.21189	3.93474	3.24037	4.6291	1.42857	0.514573	0.935572	1
1656D_10621_c1_g1_i1	306	1656C;1656D	3	4	3	4	1.67031	2.36241	3.47183	3.24037	3.70328	1.14286	0.192645	1	1
1656D_10622_c0_g1_i1	303	1656C;1656D	2	3	2	3	1.12783	1.80447	2.46885	2.16025	2.77746	1.28571	0.36257	1	1
1656D_10622_c1_g1_i1	229	1656C;1656D	3	5	3	5	2.69683	4.76938	3.93474	3.24037	4.6291	1.42857	0.514573	0.935572	1
1656D_10623_c0_g1_i1	881	1656C;1656D	861	934	861	934	81.8336	90.223	897.351	929.986	864.716	0.929816	-0.104983	0.894079	1
1656D_10625_c0_g1_i1	1299	1656C;1656D	66	74	66	74	3.68235	4.22074	69.8994	71.2881	68.5107	0.961039	-0.0573332	0.971258	1
1656D_10626_c0_g1_i1	220	1656C;1656D	1	3	1	3	0.971229	3.06587	1.92879	1.08012	2.77746	2.57143	1.36257	0.808713	1
1656D_10628_c0_g1_i1	268	1656C;1656D	3	3	3	3	2.0721	2.19328	3.00892	3.24037	2.77746	0.857143	-0.222392	1	1
1656D_10629_c0_g1_i1	653	1656C;1656D	5	12	5	12	0.766555	1.85608	8.25523	5.40062	11.1098	2.05714	1.04064	0.563909	1
1656D_10629_c1_g1_i1	355	1656C;1656D	1	3	1	3	0.441823	1.40046	1.92879	1.08012	2.77746	2.57143	1.36257	0.808713	1
1656D_1062_c0_g1_i1	260	1656C;1656D	6	4	6	4	4.35925	3.07982	5.09201	6.48074	3.70328	0.571429	-0.807355	0.744312	1
1656D_10630_c0_g1_i1	1804	1656C;1656D	229	55	229	55	8.5238	2.09843	149.134	247.348	50.9201	0.205864	-2.28024	0.0158937	0.62409
1656D_10630_c1_g1_i1	231	1656C;1656D	1	3	1	3	0.883366	2.82255	1.92879	1.08012	2.77746	2.57143	1.36257	0.808713	1
1656D_10631_c0_g1_i1	204	1656C;1656D	2	2	2	2	2.24322	2.35446	2.00594	2.16025	1.85164	0.857143	-0.222392	1	1
1656D_10632_c0_g1_i1	553	1656C;1656D	33	32	33	32	6.79287	6.64715	32.6352	35.6441	29.6262	0.831169	-0.266787	0.846739	1
1656D_10633_c0_g1_i1	219	1656C	7	0	7	0	6.87468	0	3.78043	7.56086	0	0	-	0.0727312	1
1656D_10634_c0_g1_i1	246	1656C;1656D	4	3	4	3	3.18571	2.53496	3.54898	4.32049	2.77746	0.642857	-0.63743	0.894145	1
1656D_10636_c0_g1_i1	385	1656C	17	0	17	0	6.61837	0	9.18105	18.3621	0	0	-	0.00881392	0.449339
1656D_10637_c0_g1_i1	734	1656C;1656D	19	7	19	7	2.39615	0.893649	13.5015	20.5223	6.48074	0.315789	-1.66297	0.263127	1
1656D_10637_c1_g1_i1	497	1656C;1656D	10	3	10	3	2.50569	0.759045	6.78935	10.8012	2.77746	0.257143	-1.95936	0.283228	1
1656D_10638_c0_g1_i1	292	1656C;1656D	6	1	6	1	3.58137	0.63569	3.70328	6.48074	0.92582	0.142857	-2.80735	0.251097	1
1656D_10638_c1_g1_i1	254	1656C;1656D	2	2	2	2	1.51365	1.60323	2.00594	2.16025	1.85164	0.857143	-0.222392	1	1
1656D_10639_c0_g1_i1	1459	1656C;1656D	153	164	153	164	7.37113	8.08606	158.547	165.259	151.834	0.918768	-0.122228	0.898224	1
1656D_1063_c0_g1_i1	372	1656C;1656D	7	23	7	23	2.87313	9.91328	14.4274	7.56086	21.2939	2.81633	1.49381	0.312045	1
1656D_10641_c0_g1_i1	756	1656C;1656D	25	36	25	36	3.00722	4.38518	30.1663	27.0031	33.3295	1.23429	0.303676	0.827255	1
1656D_10642_c0_g1_i1	304	1656C;1656D	4	4	4	4	2.24633	2.39215	4.01189	4.32049	3.70328	0.857143	-0.222392	1	1
1656D_10643_c0_g1_i1	1891	1656C;1656D	155	130	155	130	5.45649	4.69228	143.888	167.419	120.357	0.718894	-0.476149	0.604842	1
1656D_10644_c1_g1_i1	311	1656C	2	0	2	0	1.08672	0	1.08012	2.16025	0	0	-	0.522231	1
1656D_10645_c0_g1_i1	1126	1656C;1656D	19	34	19	34	1.27861	2.33521	26.0001	20.5223	31.4779	1.53383	0.617143	0.641439	1
1656D_10648_c0_g1_i1	2518	1656C;1656D	8480.96	21033	8481	21033	214.656	546.608	14316.7	9160.53	19472.8	2.12573	1.08796	0.336009	1
1656D_10651_c0_g1_i1	1426	1656C;1656D	528	463	528	463	26.1745	23.4849	499.48	570.305	428.655	0.751623	-0.411918	0.603481	1
1656D_10652_c0_g1_i1	417	1656C;1656D	1	8	1	8	0.341576	2.81186	4.24334	1.08012	7.40656	6.85714	2.77761	0.242454	1
1656D_10652_c1_g1_i1	410	1656C;1656D	8	5	8	5	2.80681	1.81301	6.63504	8.64099	4.6291	0.535714	-0.900464	0.654634	1
1656D_10653_c0_g1_i1	229	1656C	8	0	8	0	7.19154	0	4.32049	8.64099	0	0	-	0.0552302	1
1656D_10654_c0_g1_i1	457	1656C;1656D	14	15	14	15	4.07269	4.45312	14.5045	15.1217	13.8873	0.918367	-0.122857	0.985762	1
1656D_10655_c0_g1_i1	4970	1656C;1656D	312	376	312	376	3.76222	4.66426	342.553	336.999	348.108	1.03297	0.0467942	0.958	1
1656D_10657_c0_g1_i1	201	1656C;1656D	6	1	6	1	6.92213	1.21296	3.70328	6.48074	0.92582	0.142857	-2.80735	0.251097	1
1656D_10658_c0_g1_i1	295	1656C;1656D	1	7	1	7	0.587122	4.36732	3.78043	1.08012	6.48074	6	2.58496	0.298202	1
1656D_10660_c0_g1_i1	210	1656C;1656D	1	1	1	1	1.05907	1.11869	1.00297	1.08012	0.92582	0.857143	-0.222392	1	1
1656D_10660_c1_g1_i1	307	1656C;1656D	3	5	3	5	1.66289	2.93363	3.93474	3.24037	4.6291	1.42857	0.514573	0.935572	1
1656D_10661_c0_g1_i1	373	1656C;1656D	36	1	36	1	14.7231	0.429114	19.9051	38.8844	0.92582	0.0238095	-5.39232	0.00281603	0.223737
1656D_10662_c0_g1_i1	498	1656C;1656D	7	11	7	11	1.7466	2.77255	8.87244	7.56086	10.184	1.34694	0.429684	0.854149	1
1656D_10663_c0_g1_i1	489	1656C;1656D	6	8	6	8	1.54839	2.08865	6.94365	6.48074	7.40656	1.14286	0.192645	1	1
1656D_10664_c0_g1_i1	625	1656C;1656D	14	18	14	18	2.31737	3.00138	15.8932	15.1217	16.6648	1.10204	0.140178	0.97036	1
1656D_10665_c0_g1_i1	335	1656C;1656D	16	5	16	5	7.74001	2.56446	10.9555	17.282	4.6291	0.267857	-1.90046	0.228466	1
1656D_10666_c0_g1_i1	219	1656D	0	6	0	6	0	6.17718	2.77746	0	5.55492	-	-	0.155871	1
1656D_10667_c1_g1_i1	270	1656C;1656D	3	3	3	3	2.04528	2.16691	3.00892	3.24037	2.77746	0.857143	-0.222392	1	1
1656D_10668_c0_g1_i1	279	1656C;1656D	2	3	2	3	1.28845	2.052	2.46885	2.16025	2.77746	1.28571	0.36257	1	1
1656D_10672_c0_g1_i1	249	1656C;1656D	4	1	4	1	3.13221	0.829757	2.62316	4.32049	0.92582	0.214286	-2.22239	0.452547	1
1656D_10674_c0_g1_i2	1155	1656C;1656D	37	63	37	63	2.40676	4.18381	49.1456	39.9646	58.3267	1.45946	0.545434	0.635633	1
1656D_10675_c0_g1_i1	331	1656C;1656D	3	12	3	12	1.47707	6.28456	7.17511	3.24037	11.1098	3.42857	1.77761	0.330991	1
1656D_10676_c0_g1_i1	437	1656C;1656D	10	4	10	4	3.14057	1.29184	7.25226	10.8012	3.70328	0.342857	-1.54432	0.387358	1
1656D_10677_c0_g1_i1	323	1656C;1656D	1	6	1	6	0.51267	3.25634	3.31752	1.08012	5.55492	5.14286	2.36257	0.372187	1
1656D_10678_c0_g1_i1	409	1656C;1656D	5	11	5	11	1.76102	4.00858	7.79232	5.40062	10.184	1.88571	0.915111	0.628577	1
1656D_1067_c0_g1_i1	468	1656C;1656D	8	8.029	8	8	2.23608	2.27649	8.02377	8.64099	7.40656	0.857143	-0.222392	0.97638	1
1656D_10680_c0_g1_i1	451	1656C;1656D	7	6	7	6	2.08113	1.82514	6.55789	7.56086	5.55492	0.734694	-0.444785	0.881029	1
1656D_10683_c1_g1_i1	352	1656D	0	6	0	6	0	2.83923	2.77746	0	5.55492	-	-	0.155871	1
1656D_10685_c0_g1_i1	432	1656C;1656D	7	4	7	4	2.24155	1.31915	5.63207	7.56086	3.70328	0.489796	-1.02975	0.626625	1
1656D_10686_c0_g1_i1	234	1656C;1656D	2	6	2	6	1.73182	5.53159	3.85758	2.16025	5.55492	2.57143	1.36257	0.59295	1
1656D_10687_c0_g1_i1	319	1656C;1656D	4	5	4	5	2.09078	2.7706	4.4748	4.32049	4.6291	1.07143	0.0995357	1	1
1656D_10689_c0_g1_i1	414	1656C;1656D	5	11	5	11	1.72674	3.91751	7.79232	5.40062	10.184	1.88571	0.915111	0.628577	1
1656D_1068_c0_g1_i1	390	1656C;1656D	6	7	6	7	2.28625	2.78189	6.48074	6.48074	6.48074	1	0	1	1
1656D_10690_c0_g1_i1	467	1656C;1656D	13	10	13	10	3.64459	2.84649	11.6499	14.0416	9.2582	0.659341	-0.600904	0.726892	1
1656D_10692_c0_g1_i1	254	1656C;1656D	1	5	1	5	0.756823	4.00806	2.85461	1.08012	4.6291	4.28571	2.09954	0.472704	1
1656D_10693_c0_g1_i1	227	1656C;1656D	4	2	4	2	3.65329	1.93214	3.08607	4.32049	1.85164	0.428571	-1.22239	0.688967	1
1656D_10695_c0_g1_i1	328	1656C;1656D	4	4	4	4	2.0006	2.12613	4.01189	4.32049	3.70328	0.857143	-0.222392	1	1
1656D_10700_c0_g1_i1	374	1656C;1656D	1	15	1	15	0.406931	6.41087	7.48371	1.08012	13.8873	12.8571	3.6845	0.0744901	1
1656D_10702_c0_g1_i1	588	1656C;1656D	10	9	10	9	1.84342	1.67158	9.56681	10.8012	8.33238	0.771429	-0.374396	0.873509	1
1656D_10704_c0_g1_i1	378	1656C;1656D	9	6	9	6	3.60686	2.51752	7.63802	9.72111	5.55492	0.571429	-0.807355	0.676178	1
1656D_10706_c0_g1_i1	223	1656C;1656D	6	1	6	1	5.65214	1.00051	3.70328	6.48074	0.92582	0.142857	-2.80735	0.251097	1
1656D_10708_c0_g1_i1	383	1656C;1656D	1.17905	5.83899	1	6	0.462253	2.39673	3.31752	1.08012	5.55492	5.14286	2.36257	0.372187	1
1656D_10708_c0_g2_i1	255	1656C;1656D	2.82095	4.16101	3	4	2.11943	3.31663	3.47183	3.24037	3.70328	1.14286	0.192645	1	1
1656D_10709_c0_g1_i1	386	1656C;1656D	18	16	18	16	6.97979	6.47277	17.1277	19.4422	14.8131	0.761905	-0.392317	0.80922	1
1656D_10709_c1_g1_i1	293	1656C;1656D	3	5	3	5	1.78123	3.15872	3.93474	3.24037	4.6291	1.42857	0.514573	0.935572	1
1656D_10710_c0_g2_i1	522	1656C;1656D	19	21	19	21	4.34413	4.85137	19.9823	20.5223	19.4422	0.947368	-0.0780025	0.99634	1
1656D_10711_c0_g1_i1	236	1656C;1656D	1	2	1	2	0.855531	1.82148	1.46588	1.08012	1.85164	1.71429	0.777608	1	1
1656D_10715_c0_g1_i1	286	1656C;1656D	1	6	1	6	0.61807	3.94924	3.31752	1.08012	5.55492	5.14286	2.36257	0.372187	1
1656D_10716_c0_g1_i1	281	1656C;1656D	3	11	3	11	1.90911	7.45547	6.7122	3.24037	10.184	3.14286	1.65208	0.378153	1
1656D_10716_c1_g1_i1	294	1656C;1656D	4	5	4	5	2.36378	3.14087	4.4748	4.32049	4.6291	1.07143	0.0995357	1	1
1656D_10717_c0_g1_i1	365	1656C;1656D	9	7	9	7	3.80356	3.11317	8.10093	9.72111	6.48074	0.666667	-0.584963	0.779495	1
1656D_10718_c0_g1_i1	458	1656C;1656D	7	12	7	12	2.02835	3.5463	9.33535	7.56086	11.1098	1.46939	0.555215	0.780827	1
1656D_10719_c0_g1_i1	232	1656C;1656D	4	3	4	3	3.51339	2.80299	3.54898	4.32049	2.77746	0.642857	-0.63743	0.894145	1
1656D_10719_c1_g1_i1	212	1656C	4	0	4	0	4.15408	0	2.16025	4.32049	0	0	-	0.204074	1
1656D_1071_c0_g2_i1	228	1656D	0	5	0	5	0	4.79911	2.31455	0	4.6291	-	-	0.210896	1
1656D_10720_c0_g1_i1	869	1656C	44	0	44	0	4.26818	0	23.7627	47.5254	0	0	-	0.000323343	0.0496059
1656D_10720_c1_g1_i1	365	1656C	9	0	9	0	3.80356	0	4.86056	9.72111	0	0	-	0.0428041	0.945471
1656D_10721_c0_g1_i1	1566	1656C;1656D	81	204	81	204	3.57594	9.22224	138.179	87.49	188.867	2.15873	1.11018	0.231202	1
1656D_10724_c0_g1_i1	496	1656C;1656D	17	21	17	21	4.27595	5.33485	18.9022	18.3621	19.4422	1.05882	0.0824622	0.99683	1
1656D_10725_c0_g1_i1	351	1656C;1656D	9	8	9	8	4.05007	3.80756	8.56384	9.72111	7.40656	0.761905	-0.392317	0.87572	1
1656D_10726_c0_g1_i1	221	1656C;1656D	1	4	1	4	0.961738	4.06483	2.3917	1.08012	3.70328	3.42857	1.77761	0.612428	1
1656D_10727_c0_g1_i1	211	1656D	0	14	0	14	0	15.5268	6.48074	0	12.9615	-	-	0.0288114	0.812388
1656D_10728_c0_g1_i1	441	1656D	0	16	0	16	0	5.0759	7.40656	0	14.8131	-	-	0.0209804	0.717393
1656D_10729_c0_g1_i1	292	1656C;1656D	4	5	4	5	2.38758	3.17845	4.4748	4.32049	4.6291	1.07143	0.0995357	1	1
1656D_1072_c0_g1_i1	241	1656D	0	3	0	3	0	2.63601	1.38873	0	2.77746	-	-	0.428162	1
1656D_1072_c1_g1_i1	221	1656C;1656D	2	2	2	2	1.92348	2.03241	2.00594	2.16025	1.85164	0.857143	-0.222392	1	1
1656D_10733_c0_g1_i1	209	1656C;1656D	2	4	2	4	2.13412	4.51536	2.93176	2.16025	3.70328	1.71429	0.777608	0.88701	1
1656D_10734_c0_g1_i1	280	1656C;1656D	3	7	3	7	1.92267	4.76746	4.86056	3.24037	6.48074	2	1	0.677318	1
1656D_10736_c0_g2_i1	660	1656C;1656D	69	41	69	41	10.3874	6.22826	56.2436	74.5285	37.9586	0.509317	-0.973365	0.376056	1
1656D_10738_c0_g1_i1	273	1656C;1656D	3	4	3	4	2.00934	2.84512	3.47183	3.24037	3.70328	1.14286	0.192645	1	1
1656D_10741_c0_g1_i1	227	1656C;1656D	1	3	1	3	0.913321	2.89821	1.92879	1.08012	2.77746	2.57143	1.36257	0.808713	1
1656D_10741_c1_g1_i1	287	1656C;1656D	1	2	1	2	0.615016	1.30701	1.46588	1.08012	1.85164	1.71429	0.777608	1	1
1656D_10742_c0_g1_i1	211	1656C;1656D	1	4	1	4	1.04719	4.43623	2.3917	1.08012	3.70328	3.42857	1.77761	0.612428	1
1656D_10743_c1_g1_i1	352	1656C;1656D	4	1	4	1	1.79153	0.473204	2.62316	4.32049	0.92582	0.214286	-2.22239	0.452547	1
1656D_10744_c0_g1_i1	230	1656C;1656D	3	7	3	7	2.67324	6.64099	4.86056	3.24037	6.48074	2	1	0.677318	1
1656D_10745_c1_g1_i1	425	1656C;1656D	4	3	4	3	1.32019	1.01946	3.54898	4.32049	2.77746	0.642857	-0.63743	0.894145	1
1656D_10746_c0_g1_i1	392	1656C;1656D	9	3	9	3	3.39918	1.18171	6.24929	9.72111	2.77746	0.285714	-1.80735	0.335959	1
1656D_1074_c0_g1_i1	291	1656C;1656D	3	7	3	7	1.79991	4.47157	4.86056	3.24037	6.48074	2	1	0.677318	1
1656D_10752_c0_g1_i1	393	1656C;1656D	2	3	2	3	0.752112	1.17708	2.46885	2.16025	2.77746	1.28571	0.36257	1	1
1656D_10752_c1_g1_i1	636	1656C;1656D	6	13	6	13	0.963476	2.10267	9.2582	6.48074	12.0357	1.85714	0.893085	0.613009	1
1656D_10753_c0_g1_i1	227	1656C;1656D	6	9	6	9	5.47993	8.69462	7.40656	6.48074	8.33238	1.28571	0.36257	0.911785	1
1656D_10754_c0_g1_i1	218	1656C;1656D	2	3	2	3	1.97579	3.10781	2.46885	2.16025	2.77746	1.28571	0.36257	1	1
1656D_10754_c1_g1_i1	221	1656C;1656D	5	1	5	1	4.80869	1.01621	3.16322	5.40062	0.92582	0.171429	-2.54432	0.332471	1
1656D_10756_c0_g1_i1	360	1656C;1656D	1	11	1	11	0.432333	5.01549	5.63207	1.08012	10.184	9.42857	3.23704	0.139126	1
1656D_10757_c0_g1_i1	322	1656C;1656D	7	5	7	5	3.60568	2.72692	6.09498	7.56086	4.6291	0.612245	-0.707819	0.75953	1
1656D_10757_c1_g1_i1	345	1656C;1656D	3	5	3	5	1.38814	2.44794	3.93474	3.24037	4.6291	1.42857	0.514573	0.935572	1
1656D_10758_c0_g1_i1	287	1656D	0	8	0	8	0	5.22805	3.70328	0	7.40656	-	-	0.0931956	1
1656D_10761_c0_g1_i1	420	1656C;1656D	6	9	6	9	2.02061	3.12195	7.40656	6.48074	8.33238	1.28571	0.36257	0.911785	1
1656D_10763_c0_g1_i1	422	1656C;1656D	13	1	13	1	4.34537	0.343981	7.48371	14.0416	0.92582	0.0659341	-3.92283	0.0556724	1
1656D_10764_c0_g1_i1	327	1656C;1656D	3	4	3	4	1.50572	2.13545	3.47183	3.24037	3.70328	1.14286	0.192645	1	1
1656D_10764_c1_g1_i1	280	1656C;1656D	4	1	4	1	2.56356	0.681065	2.62316	4.32049	0.92582	0.214286	-2.22239	0.452547	1
1656D_10765_c0_g1_i1	223	1656C;1656D	3	3	3	3	2.82607	3.00152	3.00892	3.24037	2.77746	0.857143	-0.222392	1	1
1656D_10766_c0_g1_i1	528	1656C;1656D	21	10	21	10	4.7005	2.26259	15.9704	22.6826	9.2582	0.408163	-1.29278	0.36436	1
1656D_10767_c0_g1_i1	620	1656C;1656D	8	9	8	9	1.34268	1.52204	8.48668	8.64099	8.33238	0.964286	-0.0524674	1	1
1656D_10768_c0_g1_i1	280	1656C;1656D	6	5	6	5	3.84534	3.40533	5.55492	6.48074	4.6291	0.714286	-0.485427	0.884459	1
1656D_10769_c0_g1_i1	1369	1656C;1656D	51	25	51	25	2.66139	1.33438	39.1159	55.0863	23.1455	0.420168	-1.25096	0.288334	1
1656D_10769_c1_g1_i1	550	1656C;1656D	21	5	21	5	4.36693	1.04889	13.6558	22.6826	4.6291	0.204082	-2.29278	0.129939	1
1656D_10770_c0_g1_i1	364	1656C;1656D	4	6	4	6	1.69772	2.68179	4.93771	4.32049	5.55492	1.28571	0.36257	0.968366	1
1656D_10771_c0_g1_i1	233	1656C;1656D	3	3	3	3	2.6173	2.79005	3.00892	3.24037	2.77746	0.857143	-0.222392	1	1
1656D_10771_c1_g1_i1	324	1656C;1656D	4	1	4	1	2.04075	0.540645	2.62316	4.32049	0.92582	0.214286	-2.22239	0.452547	1
1656D_10772_c0_g1_i1	272	1656C;1656D	2	7	2	7	1.34745	5.01321	4.32049	2.16025	6.48074	3	1.58496	0.492048	1
1656D_10772_c1_g1_i1	655	1656C;1656D	18	29	18	29	2.74552	4.46316	23.1455	19.4422	26.8488	1.38095	0.465664	0.74222	1
1656D_10773_c0_g1_i1	216	1656C	2	0	2	0	2.00641	0	1.08012	2.16025	0	0	-	0.522231	1
1656D_10773_c1_g1_i1	383	1656C	8	0	8	0	3.13644	0	4.32049	8.64099	0	0	-	0.0552302	1
1656D_10774_c0_g1_i1	1120	1656C;1656D	28	38	28	38	1.89784	2.62855	32.7123	30.2435	35.1812	1.16327	0.21818	0.880491	1
1656D_10775_c0_g1_i1	1348	1656C;1656D	55	41	55	41	2.92693	2.23136	48.6827	59.4068	37.9586	0.638961	-0.6462	0.571237	1
1656D_10776_c1_g1_i1	470	1656C;1656D	9	11	9	11	2.49549	3.0943	9.95257	9.72111	10.184	1.04762	0.0671142	1	1
1656D_10777_c0_g1_i1	691	1656C;1656D	32	17	32	17	4.45773	2.39459	25.1514	34.564	15.7389	0.455357	-1.13493	0.377938	1
1656D_10777_c1_g1_i1	235	1656C;1656D	6	3	6	3	5.1622	2.74199	4.6291	6.48074	2.77746	0.428571	-1.22239	0.58886	1
1656D_10779_c0_g1_i1	656	1656C;1656D	10	9	10	9	1.52118	1.38146	9.56681	10.8012	8.33238	0.771429	-0.374396	0.873509	1
1656D_10779_c1_g1_i1	218	1656C	2	0	2	0	1.97579	0	1.08012	2.16025	0	0	-	0.522231	1
1656D_1077_c0_g1_i1	231	1656D	0	6	0	6	0	5.64511	2.77746	0	5.55492	-	-	0.155871	1
1656D_10780_c0_g1_i1	262	1656D	0	8	0	8	0	6.08675	3.70328	0	7.40656	-	-	0.0931956	1
1656D_10785_c0_g1_i1	255	1656C;1656D	5	5	5	5	3.75659	3.98537	5.01486	5.40062	4.6291	0.857143	-0.222392	1	1
1656D_10786_c0_g1_i1	288	1656C;1656D	4	10	4	10	2.44301	6.50252	6.78935	4.32049	9.2582	2.14286	1.09954	0.571456	1
1656D_10787_c0_g1_i1	325	1656D	0	6	0	6	0	3.23147	2.77746	0	5.55492	-	-	0.155871	1
1656D_10787_c1_g1_i1	251	1656D	0	3	0	3	0	2.45703	1.38873	0	2.77746	-	-	0.428162	1
1656D_10788_c0_g1_i1	244	1656C;1656D	3	5	3	5	2.4247	4.29287	3.93474	3.24037	4.6291	1.42857	0.514573	0.935572	1
1656D_10789_c0_g1_i1	252	1656C;1656D	4	3	4	3	3.06528	2.44011	3.54898	4.32049	2.77746	0.642857	-0.63743	0.894145	1
1656D_10790_c0_g1_i1	366	1656C;1656D	4	5	4	5	1.68239	2.21408	4.4748	4.32049	4.6291	1.07143	0.0995357	1	1
1656D_10791_c0_g1_i1	547	1656C;1656D	10	10	10	10	2.09926	2.11878	10.0297	10.8012	9.2582	0.857143	-0.222392	0.954916	1
1656D_10793_c0_g1_i1	549	1656C;1656D	14	16	14	16	2.92025	3.3686	14.9674	15.1217	14.8131	0.979592	-0.0297473	1	1
1656D_10794_c0_g1_i1	863	1656C;1656D	17	14	17	14	1.66624	1.39403	15.6618	18.3621	12.9615	0.705882	-0.5025	0.75169	1
1656D_10794_c1_g1_i1	234	1656C	2	0	2	0	1.73182	0	1.08012	2.16025	0	0	-	0.522231	1
1656D_10795_c0_g1_i1	267	1656C;1656D	5	5	5	5	3.47018	3.67894	5.01486	5.40062	4.6291	0.857143	-0.222392	1	1
1656D_10796_c0_g1_i1	2212	1656C;1656D	803	679	803	679	23.5547	20.4389	747.985	867.339	628.632	0.724782	-0.464381	0.552676	1
1656D_10798_c0_g1_i1	246	1656C;1656D	8	7	8	7	6.37141	5.9149	7.56086	8.64099	6.48074	0.75	-0.415037	0.878186	1
1656D_10799_c0_g1_i1	303	1656C	13	0	13	0	7.33092	0	7.0208	14.0416	0	0	-	0.0179112	0.658309
1656D_1079_c0_g1_i1	327	1656C;1656D	5	6	5	6	2.50953	3.20317	5.47777	5.40062	5.55492	1.02857	0.040642	1	1
1656D_107_c0_g1_i1	491	1656C;1656D	3	15	3	15	0.768398	3.88624	8.56384	3.24037	13.8873	4.28571	2.09954	0.227477	1
1656D_10800_c0_g1_i1	266	1656C;1656D	2	3	2	3	1.39566	2.22299	2.46885	2.16025	2.77746	1.28571	0.36257	1	1
1656D_10800_c1_g1_i1	217	1656C;1656D	1	2	1	2	0.994904	2.08979	1.46588	1.08012	1.85164	1.71429	0.777608	1	1
1656D_10802_c0_g1_i1	1039	1656C;1656D	27	49	27	49	2.02714	3.75055	37.2643	29.1633	45.3652	1.55556	0.63743	0.599214	1
1656D_10803_c0_g1_i1	570	1656C;1656D	22	24	22	24	4.28979	4.71453	22.9912	23.7627	22.2197	0.935065	-0.0968615	0.977653	1
1656D_10803_c1_g1_i1	240	1656C;1656D	1	2	1	2	0.828526	1.76957	1.46588	1.08012	1.85164	1.71429	0.777608	1	1
1656D_10804_c0_g1_i1	213	1656C;1656D	5	2	5	2	5.16423	2.17249	3.62613	5.40062	1.85164	0.342857	-1.54432	0.534519	1
1656D_10805_c0_g1_i1	235	1656C;1656D	4	4	4	4	3.44147	3.65599	4.01189	4.32049	3.70328	0.857143	-0.222392	1	1
1656D_10807_c0_g1_i1	254	1656C;1656D	6	4	6	4	4.54094	3.20645	5.09201	6.48074	3.70328	0.571429	-0.807355	0.744312	1
1656D_10809_c0_g1_i1	211	1656C;1656D	3	3	3	3	3.14156	3.32718	3.00892	3.24037	2.77746	0.857143	-0.222392	1	1
1656D_10810_c0_g1_i1	275	1656C;1656D	2	5	2	5	1.32197	3.51184	3.39467	2.16025	4.6291	2.14286	1.09954	0.721617	1
1656D_10810_c1_g1_i1	356	1656C;1656D	7	8	7	8	3.08143	3.71448	7.48371	7.56086	7.40656	0.979592	-0.0297473	1	1
1656D_10812_c0_g1_i1	278	1656C;1656D	5	3	5	3	3.24368	2.0616	4.08904	5.40062	2.77746	0.514286	-0.959358	0.722412	1
1656D_10813_c0_g1_i1	1499	1656C;1656D	125	81	125	81	5.82344	3.86282	105.003	135.015	74.9914	0.555429	-0.848327	0.382563	1
1656D_10814_c0_g1_i1	284	1656C;1656D	9	5	9	5	5.62694	3.32582	7.17511	9.72111	4.6291	0.47619	-1.07039	0.566502	1
1656D_10815_c0_g1_i1	237	1656C;1656D	4	6	4	6	3.39943	5.42439	4.93771	4.32049	5.55492	1.28571	0.36257	0.968366	1
1656D_10817_c0_g1_i1	219	1656C;1656D	2	3	2	3	1.96419	3.08859	2.46885	2.16025	2.77746	1.28571	0.36257	1	1
1656D_10818_c0_g1_i1	253	1656C;1656D	5	4	5	4	3.80686	3.23334	4.55195	5.40062	3.70328	0.685714	-0.544321	0.888737	1
1656D_10819_c0_g1_i1	332	1656C;1656D	4	8	4	8	1.96211	4.16415	5.86353	4.32049	7.40656	1.71429	0.777608	0.739051	1
1656D_10820_c0_g1_i1	204	1656C;1656D	4	1	4	1	4.48643	1.17723	2.62316	4.32049	0.92582	0.214286	-2.22239	0.452547	1
1656D_10820_c1_g1_i1	226	1656C;1656D	1	2	1	2	0.918738	1.94797	1.46588	1.08012	1.85164	1.71429	0.777608	1	1
1656D_10822_c0_g1_i1	278	1656C;1656D	2	7	2	7	1.29747	4.81041	4.32049	2.16025	6.48074	3	1.58496	0.492048	1
1656D_10823_c0_g1_i1	385	1656C;1656D	4	3	4	3	1.55726	1.21965	3.54898	4.32049	2.77746	0.642857	-0.63743	0.894145	1
1656D_10823_c1_g1_i1	328	1656C;1656D	2	7	2	7	1.0003	3.72073	4.32049	2.16025	6.48074	3	1.58496	0.492048	1
1656D_10824_c0_g1_i1	208	1656C;1656D	6	2	6	2	6.47215	2.27607	4.16619	6.48074	1.85164	0.285714	-1.80735	0.421356	1
1656D_10825_c0_g1_i1	282	1656C;1656D	3	11	3	11	1.89577	7.41408	6.7122	3.24037	10.184	3.14286	1.65208	0.378153	1
1656D_10827_c0_g1_i1	288	1656C;1656D	2	3	2	3	1.2215	1.95076	2.46885	2.16025	2.77746	1.28571	0.36257	1	1
1656D_10827_c1_g1_i1	239	1656D	0	2	0	2	0	1.78284	0.92582	0	1.85164	-	-	0.653038	1
1656D_10828_c0_g1_i1	282	1656C;1656D	2	6	2	6	1.26384	4.04404	3.85758	2.16025	5.55492	2.57143	1.36257	0.59295	1
1656D_10829_c0_g1_i1	309	1656D	0	9	0	9	0	5.23114	4.16619	0	8.33238	-	-	0.0743623	1
1656D_10829_c1_g1_i1	264	1656C;1656D	1	8	1	8	0.70642	5.99707	4.24334	1.08012	7.40656	6.85714	2.77761	0.242454	1
1656D_10832_c0_g1_i1	250	1656C;1656D	2	5	2	5	1.55682	4.12083	3.39467	2.16025	4.6291	2.14286	1.09954	0.721617	1
1656D_10833_c0_g2_i1	953	1656C;1656D	16.6914	27.0278	17	27	1.41497	2.33213	21.6796	18.3621	24.9971	1.36134	0.445032	0.760033	1
1656D_10834_c0_g1_i1	473	1656C;1656D	10	11	10	11	2.74128	3.05775	10.4926	10.8012	10.184	0.942857	-0.0848889	1	1
1656D_10835_c0_g1_i1	250	1656C;1656D	5	1	5	1	3.89205	0.824166	3.16322	5.40062	0.92582	0.171429	-2.54432	0.332471	1
1656D_10835_c1_g1_i1	213	1656C;1656D	4	1	4	1	4.13139	1.08624	2.62316	4.32049	0.92582	0.214286	-2.22239	0.452547	1
1656D_10836_c0_g1_i1	457	1656C;1656D	41	55	41	55	11.9272	16.3281	47.6026	44.2851	50.9201	1.14983	0.201415	0.875494	1
1656D_10837_c0_g1_i1	220	1656D	0	5	0	5	0	5.10979	2.31455	0	4.6291	-	-	0.210896	1
1656D_10837_c1_g1_i1	386	1656C;1656D	3	6	3	6	1.1633	2.42729	4.39765	3.24037	5.55492	1.71429	0.777608	0.793982	1
1656D_10838_c0_g1_i1	1586	1656C;1656D	108	155	108	155	4.69451	6.89989	130.078	116.653	143.502	1.23016	0.298844	0.753456	1
1656D_10840_c0_g1_i1	315	1656C;1656D	7	7	7	7	3.72957	3.95918	7.0208	7.56086	6.48074	0.857143	-0.222392	0.990747	1
1656D_10841_c0_g1_i1	243	1656C;1656D	4	2	4	2	3.25431	1.73211	3.08607	4.32049	1.85164	0.428571	-1.22239	0.688967	1
1656D_10843_c0_g1_i1	261	1656D	0	13	0	13	0	9.93433	6.01783	0	12.0357	-	-	0.0341426	0.861749
1656D_10844_c0_g1_i1	217	1656C	6	0	6	0	5.96942	0	3.24037	6.48074	0	0	-	0.0984225	1
1656D_10847_c0_g1_i1	524	1656C;1656D	49	1	49	1	11.1259	0.229385	26.9259	52.926	0.92582	0.0174927	-5.8371	0.000833546	0.0971674
1656D_10848_c0_g2_i1	572	1656C;1656D	17	33	17	33	3.29377	6.44356	24.4571	18.3621	30.5521	1.66387	0.734539	0.580272	1
1656D_10848_c1_g1_i1	324	1656C;1656D	1	2	1	2	0.510188	1.08129	1.46588	1.08012	1.85164	1.71429	0.777608	1	1
1656D_10849_c0_g1_i1	210	1656C;1656D	3	6	3	6	3.17722	6.71215	4.39765	3.24037	5.55492	1.71429	0.777608	0.793982	1
1656D_1084_c0_g1_i1	347	1656D	0	3.04679	0	3	0	1.47959	1.38873	0	2.77746	-	-	0.428162	1
1656D_1084_c0_g2_i1	498	1656C;1656D	16	10.9532	16	11	3.99223	2.76076	13.733	17.282	10.184	0.589286	-0.762961	0.621886	1
1656D_1084_c1_g1_i1	259	1656C;1656D	3	2	3	2	2.19264	1.54967	2.54601	3.24037	1.85164	0.571429	-0.807355	0.902082	1
1656D_10850_c0_g1_i1	227	1656C;1656D	3	5	3	5	2.73996	4.83034	3.93474	3.24037	4.6291	1.42857	0.514573	0.935572	1
1656D_10852_c0_g1_i1	529	1656C;1656D	4	10	4	10	0.891983	2.25498	6.78935	4.32049	9.2582	2.14286	1.09954	0.571456	1
1656D_10852_c1_g1_i1	390	1656C;1656D	2	12	2	12	0.762082	4.76896	6.63504	2.16025	11.1098	5.14286	2.36257	0.218189	1
1656D_10853_c0_g1_i1	378	1656C;1656D	29	3	29	3	11.6221	1.25876	17.0505	31.3236	2.77746	0.08867	-3.49541	0.0250622	0.779547
1656D_10856_c0_g1_i1	217	1656C;1656D	4	3	4	3	3.97961	3.13468	3.54898	4.32049	2.77746	0.642857	-0.63743	0.894145	1
1656D_10857_c0_g1_i1	369	1656C;1656D	9	5	9	5	3.73786	2.18633	7.17511	9.72111	4.6291	0.47619	-1.07039	0.566502	1
1656D_10858_c0_g1_i1	669	1656C;1656D	650	528	650	528	95.6161	78.4757	595.457	702.08	488.833	0.696264	-0.522294	0.506719	1
1656D_10859_c0_g1_i1	286	1656C;1656D	1	5	1	5	0.61807	3.29103	2.85461	1.08012	4.6291	4.28571	2.09954	0.472704	1
1656D_1085_c0_g1_i1	245	1656C;1656D	5	3	5	3	4.00998	2.55726	4.08904	5.40062	2.77746	0.514286	-0.959358	0.722412	1
1656D_10860_c0_g1_i1	307	1656C;1656D	6	5	6	5	3.32577	2.93363	5.55492	6.48074	4.6291	0.714286	-0.485427	0.884459	1
1656D_10862_c0_g1_i1	218	1656C;1656D	3	5	3	5	2.96368	5.17969	3.93474	3.24037	4.6291	1.42857	0.514573	0.935572	1
1656D_10863_c0_g1_i1	480	1656C;1656D	5	6	5	6	1.33275	1.62092	5.47777	5.40062	5.55492	1.02857	0.040642	1	1
1656D_10863_c0_g2_i1	315	1656C	2	0	2	0	1.06559	0	1.08012	2.16025	0	0	-	0.522231	1
1656D_10864_c0_g1_i1	210	1656C;1656D	6	1	6	1	6.35444	1.11869	3.70328	6.48074	0.92582	0.142857	-2.80735	0.251097	1
1656D_10865_c0_g1_i1	307	1656C;1656D	4	3	4	3	2.21718	1.76018	3.54898	4.32049	2.77746	0.642857	-0.63743	0.894145	1
1656D_10866_c0_g1_i1	1867	1656C;1656D	62	64	62	64	2.21575	2.34495	63.1101	66.9677	59.2525	0.884793	-0.176589	0.882204	1
1656D_10867_c0_g1_i1	297	1656C;1656D	10	5	10	5	5.80761	3.08857	7.71517	10.8012	4.6291	0.428571	-1.22239	0.492244	1
1656D_10868_c1_g1_i1	293	1656D	0	6	0	6	0	3.79047	2.77746	0	5.55492	-	-	0.155871	1
1656D_10869_c0_g1_i1	230	1656C;1656D	2	2.38747	2	2	1.78216	2.26503	2.00594	2.16025	1.85164	0.857143	-0.222392	1	1
1656D_10871_c0_g1_i1	209	1656C;1656D	12	1	12	1	12.8047	1.12884	6.94365	12.9615	0.92582	0.0714286	-3.80735	0.0666762	1
1656D_10878_c0_g1_i1	237	1656C;1656D	5	4	5	4	4.24929	3.61626	4.55195	5.40062	3.70328	0.685714	-0.544321	0.888737	1
1656D_10879_c0_g1_i1	238	1656C;1656D	10	9	10	9	8.434	8.07933	9.56681	10.8012	8.33238	0.771429	-0.374396	0.873509	1
1656D_1087_c0_g1_i1	398	1656C;1656D	2	8	2	8	0.738041	3.06777	4.7834	2.16025	7.40656	3.42857	1.77761	0.412	1
1656D_10881_c0_g1_i1	676	1656C;1656D	14	9	14	9	2.02375	1.31468	11.7271	15.1217	8.33238	0.55102	-0.859822	0.592142	1
1656D_10881_c1_g1_i1	211	1656C;1656D	2	3	2	3	2.09438	3.32718	2.46885	2.16025	2.77746	1.28571	0.36257	1	1
1656D_10883_c0_g1_i1	210	1656C;1656D	1	8	1	8	1.05907	8.94954	4.24334	1.08012	7.40656	6.85714	2.77761	0.242454	1
1656D_10884_c0_g1_i1	291	1656C;1656D	2.34156	4.11341	2	4	1.40486	2.62763	2.93176	2.16025	3.70328	1.71429	0.777608	0.88701	1
1656D_10884_c0_g2_i1	211	1656C;1656D	0.658445	1.88659	1	2	0.689516	2.09234	1.46588	1.08012	1.85164	1.71429	0.777608	1	1
1656D_10885_c0_g1_i1	274	1656D	0	6	0	6	0	4.24117	2.77746	0	5.55492	-	-	0.155871	1
1656D_10886_c0_g1_i1	255	1656C;1656D	5	3	5	3	3.75659	2.39122	4.08904	5.40062	2.77746	0.514286	-0.959358	0.722412	1
1656D_10887_c0_g1_i1	262	1656C;1656D	2	4	2	4	1.43419	3.04338	2.93176	2.16025	3.70328	1.71429	0.777608	0.88701	1
1656D_10889_c0_g1_i1	310	1656C;1656D	5	8	5	8	2.72959	4.62643	6.40359	5.40062	7.40656	1.37143	0.455679	0.882513	1
1656D_1088_c0_g1_i1	206	1656C;1656D	1	7	1	7	1.09604	8.12473	3.78043	1.08012	6.48074	6	2.58496	0.298202	1
1656D_10890_c0_g1_i1	275	1656D	0	9	0	9	0	6.32131	4.16619	0	8.33238	-	-	0.0743623	1
1656D_10891_c0_g1_i1	231	1656C;1656D	3	5	3	5	2.6501	4.70426	3.93474	3.24037	4.6291	1.42857	0.514573	0.935572	1
1656D_10892_c0_g1_i1	270	1656C;1656D	4	6	4	6	2.72704	4.33383	4.93771	4.32049	5.55492	1.28571	0.36257	0.968366	1
1656D_10895_c0_g1_i1	282	1656C;1656D	3	3	3	3	1.89577	2.02202	3.00892	3.24037	2.77746	0.857143	-0.222392	1	1
1656D_10895_c1_g1_i1	330	1656C;1656D	2	3	2	3	0.988998	1.5779	2.46885	2.16025	2.77746	1.28571	0.36257	1	1
1656D_10899_c0_g1_i1	267	1656C;1656D	7	2	7	2	4.85825	1.47158	4.70625	7.56086	1.85164	0.244898	-2.02975	0.336922	1
1656D_10900_c0_g1_i1	280	1656C;1656D	1	5	1	5	0.64089	3.40533	2.85461	1.08012	4.6291	4.28571	2.09954	0.472704	1
1656D_10900_c1_g1_i1	209	1656C	4	0	4	0	4.26825	0	2.16025	4.32049	0	0	-	0.204074	1
1656D_10901_c0_g1_i1	219	1656C;1656D	3	6	3	6	2.94629	6.17718	4.39765	3.24037	5.55492	1.71429	0.777608	0.793982	1
1656D_10903_c0_g1_i1	268	1656C;1656D	5	3	5	3	3.45351	2.19328	4.08904	5.40062	2.77746	0.514286	-0.959358	0.722412	1
1656D_10907_c0_g1_i1	308	1656C;1656D	7	3	7	3	3.85968	1.75289	5.16916	7.56086	2.77746	0.367347	-1.44478	0.484262	1
1656D_10909_c0_g1_i1	332	1656C;1656D	15	10	15	10	7.35792	5.20518	12.73	16.2019	9.2582	0.571429	-0.807355	0.608052	1
1656D_10910_c0_g1_i1	258	1656D	0	5	0	5	0	3.89721	2.31455	0	4.6291	-	-	0.210896	1
1656D_10912_c0_g1_i1	278	1656C	14	0	14	0	9.0823	0	7.56086	15.1217	0	0	-	0.0148328	0.602502
1656D_10913_c0_g1_i1	233	1656C;1656D	3	1	3	1	2.6173	0.930016	2.0831	3.24037	0.92582	0.285714	-1.80735	0.635182	1
1656D_10913_c1_g1_i1	211	1656C	2	0	2	0	2.09438	0	1.08012	2.16025	0	0	-	0.522231	1
1656D_10915_c0_g1_i1	274	1656C;1656D	7	1	7	1	4.65839	0.706862	4.24334	7.56086	0.92582	0.122449	-3.02975	0.193965	1
1656D_10917_c0_g1_i1	202	1656C;1656D	4	1	4	1	4.56803	1.19733	2.62316	4.32049	0.92582	0.214286	-2.22239	0.452547	1
1656D_10918_c0_g1_i1	212	1656C;1656D	4	1	4	1	4.15408	1.09752	2.62316	4.32049	0.92582	0.214286	-2.22239	0.452547	1
1656D_10919_c0_g1_i1	234	1656C;1656D	2	4	2	4	1.73182	3.68773	2.93176	2.16025	3.70328	1.71429	0.777608	0.88701	1
1656D_10919_c1_g1_i1	217	1656C	2	0	2	0	1.98981	0	1.08012	2.16025	0	0	-	0.522231	1
1656D_1091_c0_g1_i1	214	1656C;1656D	5	3	5	3	5.1122	3.23055	4.08904	5.40062	2.77746	0.514286	-0.959358	0.722412	1
1656D_10920_c0_g1_i1	252	1656C;1656D	4	7	4	7	3.06528	5.69359	5.40062	4.32049	6.48074	1.5	0.584963	0.844754	1
1656D_10925_c0_g1_i1	223	1656D	0	4	0	4	0	4.00203	1.85164	0	3.70328	-	-	0.295121	1
1656D_10926_c0_g1_i1	263	1656C;1656D	3	5	3	5	2.13605	3.77674	3.93474	3.24037	4.6291	1.42857	0.514573	0.935572	1
1656D_10927_c1_g1_i1	218	1656C;1656D	1	4	1	4	0.987895	4.14375	2.3917	1.08012	3.70328	3.42857	1.77761	0.612428	1
1656D_1092_c0_g1_i1	956	1656C;1656D	8	21	8	21	0.675136	1.80399	14.0416	8.64099	19.4422	2.25	1.16993	0.433865	1
1656D_10931_c0_g1_i1	301	1656C;1656D	6	4	6	4	3.41477	2.43128	5.09201	6.48074	3.70328	0.571429	-0.807355	0.744312	1
1656D_10937_c0_g1_i1	308	1656C;1656D	1	7	1	7	0.551382	4.09007	3.78043	1.08012	6.48074	6	2.58496	0.298202	1
1656D_10937_c1_g1_i1	214	1656C;1656D	5	2	5	2	5.1122	2.1537	3.62613	5.40062	1.85164	0.342857	-1.54432	0.534519	1
1656D_10939_c0_g1_i1	535	1656C;1656D	7	7	7	7	1.52905	1.54528	7.0208	7.56086	6.48074	0.857143	-0.222392	0.990747	1
1656D_10940_c0_g1_i1	215	1656C;1656D	5	2	5	2	5.05976	2.13651	3.62613	5.40062	1.85164	0.342857	-1.54432	0.534519	1
1656D_10942_c0_g1_i1	394	1656C;1656D	16	20	16	20	5.99401	7.81107	17.8992	17.282	18.5164	1.07143	0.0995357	0.988845	1
1656D_10943_c0_g1_i1	467	1656C;1656D	62	63	62	63	17.3819	17.9329	62.6472	66.9677	58.3267	0.870968	-0.199309	0.865267	1
1656D_10943_c1_g1_i1	251	1656C;1656D	4	2	4	2	3.09032	1.63802	3.08607	4.32049	1.85164	0.428571	-1.22239	0.688967	1
1656D_10944_c0_g1_i1	202	1656C;1656D	3	2	3	2	3.42602	2.39466	2.54601	3.24037	1.85164	0.571429	-0.807355	0.902082	1
1656D_10946_c0_g1_i1	215	1656C;1656D	2	2	2	2	2.0239	2.13651	2.00594	2.16025	1.85164	0.857143	-0.222392	1	1
1656D_10946_c1_g1_i1	203	1656C;1656D	1	2	1	2	1.13056	2.37485	1.46588	1.08012	1.85164	1.71429	0.777608	1	1
1656D_10947_c0_g1_i1	276	1656C;1656D	1	4	1	4	0.657454	2.78963	2.3917	1.08012	3.70328	3.42857	1.77761	0.612428	1
1656D_10948_c0_g1_i1	232	1656C	8	0	8	0	7.02677	0	4.32049	8.64099	0	0	-	0.0552302	1
1656D_10950_c0_g1_i1	326	1656C	10	0	10	0	5.04452	0	5.40062	10.8012	0	0	-	0.0336981	0.861749
1656D_10951_c0_g1_i1	216	1656C;1656D	4	2	4	2	4.01283	2.1151	3.08607	4.32049	1.85164	0.428571	-1.22239	0.688967	1
1656D_10952_c0_g1_i1	254	1656C;1656D	4	4	4	4	3.02729	3.20645	4.01189	4.32049	3.70328	0.857143	-0.222392	1	1
1656D_10953_c0_g1_i1	297	1656C	8	0	8	0	4.64609	0	4.32049	8.64099	0	0	-	0.0552302	1
1656D_10954_c0_g1_i1	729	1656C;1656D	33	10	33	10	4.20789	1.29067	22.4511	35.6441	9.2582	0.25974	-1.94486	0.14502	1
1656D_10955_c0_g1_i1	221	1656C;1656D	5	3	5	3	4.80869	3.04862	4.08904	5.40062	2.77746	0.514286	-0.959358	0.722412	1
1656D_10956_c0_g1_i1	310	1656C;1656D	5	8	5	8	2.72959	4.62643	6.40359	5.40062	7.40656	1.37143	0.455679	0.882513	1
1656D_10957_c0_g1_i1	427	1656C;1656D	7	3	7	3	2.29174	1.01036	5.16916	7.56086	2.77746	0.367347	-1.44478	0.484262	1
1656D_10957_c1_g1_i1	214	1656C;1656D	3	1	3	1	3.06732	1.07685	2.0831	3.24037	0.92582	0.285714	-1.80735	0.635182	1
1656D_10958_c0_g1_i1	211	1656C;1656D	1	2	1	2	1.04719	2.21812	1.46588	1.08012	1.85164	1.71429	0.777608	1	1
1656D_10958_c1_g1_i1	221	1656C;1656D	1	2	1	2	0.961738	2.03241	1.46588	1.08012	1.85164	1.71429	0.777608	1	1
1656D_1095_c0_g1_i1	276	1656C;1656D	2	7	2	7	1.31491	4.88185	4.32049	2.16025	6.48074	3	1.58496	0.492048	1
1656D_10962_c0_g1_i1	796	1656C;1656D	17	15	17	15	1.88489	1.68647	16.1247	18.3621	13.8873	0.756303	-0.402965	0.807785	1
1656D_10962_c0_g2_i1	370	1656C;1656D	5	8	5	8	2.06741	3.48286	6.40359	5.40062	7.40656	1.37143	0.455679	0.882513	1
1656D_10963_c0_g1_i1	255	1656C;1656D	4	1	4	1	3.00527	0.797074	2.62316	4.32049	0.92582	0.214286	-2.22239	0.452547	1
1656D_10966_c0_g1_i1	208	1656C;1656D	3	3	3	3	3.23608	3.4141	3.00892	3.24037	2.77746	0.857143	-0.222392	1	1
1656D_10967_c0_g1_i1	639	1656C;1656D	20	15	20	15	3.18442	2.4073	17.7449	21.6025	13.8873	0.642857	-0.63743	0.662707	1
1656D_10968_c0_g1_i1	291	1656C;1656D	8	3	8	3	4.79975	1.91639	5.70922	8.64099	2.77746	0.321429	-1.63743	0.40164	1
1656D_1096_c0_g1_i1	332	1656C;1656D	7	2	7	2	3.43369	1.04104	4.70625	7.56086	1.85164	0.244898	-2.02975	0.336922	1
1656D_10974_c0_g1_i1	257	1656C;1656D	5	13	5	13	3.71095	10.2086	8.71814	5.40062	12.0357	2.22857	1.15612	0.507051	1
1656D_10975_c0_g2_i1	238	1656C;1656D	3	8	3	8	2.5302	7.18162	5.32347	3.24037	7.40656	2.28571	1.19265	0.580843	1
1656D_10976_c0_g1_i1	240	1656C;1656D	5	5	5	5	4.14263	4.42394	5.01486	5.40062	4.6291	0.857143	-0.222392	1	1
1656D_1097_c0_g1_i1	407	1656C;1656D	4	14	4	14	1.42081	5.14873	8.64099	4.32049	12.9615	3	1.58496	0.355727	1
1656D_10980_c0_g1_i1	235	1656C;1656D	4	6	4	6	3.44147	5.48399	4.93771	4.32049	5.55492	1.28571	0.36257	0.968366	1
1656D_10981_c0_g1_i1	241	1656C	2	0	2	0	1.64769	0	1.08012	2.16025	0	0	-	0.522231	1
1656D_10981_c1_g1_i1	210	1656C;1656D	1	1	1	1	1.05907	1.11869	1.00297	1.08012	0.92582	0.857143	-0.222392	1	1
1656D_10982_c0_g1_i1	487	1656C;1656D	4	5	4	5	1.04012	1.31475	4.4748	4.32049	4.6291	1.07143	0.0995357	1	1
1656D_10985_c0_g1_i1	202	1656C;1656D	3	3	3	3	3.42602	3.59199	3.00892	3.24037	2.77746	0.857143	-0.222392	1	1
1656D_10986_c0_g1_i1	273	1656C;1656D	6	2	6	2	4.01868	1.42256	4.16619	6.48074	1.85164	0.285714	-1.80735	0.421356	1
1656D_10987_c0_g1_i1	276	1656C;1656D	5	2	5	2	3.28727	1.39481	3.62613	5.40062	1.85164	0.342857	-1.54432	0.534519	1
1656D_1098_c0_g1_i1	216	1656C;1656D	3	2	3	2	3.00962	2.1151	2.54601	3.24037	1.85164	0.571429	-0.807355	0.902082	1
1656D_1098_c1_g1_i1	229	1656C;1656D	6	4	6	4	5.39365	3.81551	5.09201	6.48074	3.70328	0.571429	-0.807355	0.744312	1
1656D_10991_c0_g1_i1	272	1656C;1656D	5	7	5	7	3.36864	5.01321	5.94068	5.40062	6.48074	1.2	0.263034	0.9921	1
1656D_10992_c0_g2_i1	348	1656C;1656D	9	5	9	5	4.10928	2.41637	7.17511	9.72111	4.6291	0.47619	-1.07039	0.566502	1
1656D_10993_c0_g1_i1	397	1656C	14	0	14	0	5.18312	0	7.56086	15.1217	0	0	-	0.0148328	0.602502
1656D_10998_c0_g1_i1	267	1656C;1656D	14	6	14	6	9.7165	4.41473	10.3383	15.1217	5.55492	0.367347	-1.44478	0.366233	1
1656D_11000_c0_g1_i1	313	1656C;1656D	5	7	5	7	2.68464	3.99577	5.94068	5.40062	6.48074	1.2	0.263034	0.9921	1
1656D_11001_c1_g1_i1	235	1656C;1656D	3	2	3	2	2.5811	1.828	2.54601	3.24037	1.85164	0.571429	-0.807355	0.902082	1
1656D_11002_c0_g1_i1	307	1656C;1656D	2	5	2	5	1.10859	2.93363	3.39467	2.16025	4.6291	2.14286	1.09954	0.721617	1
1656D_11003_c0_g1_i1	224	1656C	3	0	3	0	2.79948	0	1.62019	3.24037	0	0	-	0.316445	1
1656D_11005_c0_g1_i1	216	1656C;1656D	2	4	2	4	2.00641	4.23019	2.93176	2.16025	3.70328	1.71429	0.777608	0.88701	1
1656D_11008_c0_g1_i1	207	1656C;1656D	4	3	4	3	4.3435	3.44659	3.54898	4.32049	2.77746	0.642857	-0.63743	0.894145	1
1656D_11009_c0_g1_i1	216	1656C;1656D	2	5	2	5	2.00641	5.28774	3.39467	2.16025	4.6291	2.14286	1.09954	0.721617	1
1656D_11010_c0_g1_i1	266	1656C;1656D	1	7	1	7	0.697829	5.18698	3.78043	1.08012	6.48074	6	2.58496	0.298202	1
1656D_11013_c0_g1_i1	287	1656C	8	0	8	0	4.92013	0	4.32049	8.64099	0	0	-	0.0552302	1
1656D_11015_c0_g1_i1	212	1656C;1656D	8	5	8	5	8.30816	5.48761	6.63504	8.64099	4.6291	0.535714	-0.900464	0.654634	1
1656D_11017_c0_g1_i1	264	1656C;1656D	3	3	3	3	2.11926	2.2489	3.00892	3.24037	2.77746	0.857143	-0.222392	1	1
1656D_11017_c1_g1_i1	259	1656C;1656D	1	4	1	4	0.730879	3.09934	2.3917	1.08012	3.70328	3.42857	1.77761	0.612428	1
1656D_11018_c0_g1_i1	246	1656C;1656D	4	7	4	7	3.18571	5.9149	5.40062	4.32049	6.48074	1.5	0.584963	0.844754	1
1656D_11019_c1_g1_i1	333	1656C;1656D	2	3	2	3	0.97698	1.55539	2.46885	2.16025	2.77746	1.28571	0.36257	1	1
1656D_1101_c0_g1_i1	216	1656C;1656D	10	4	10	4	10.0321	4.23019	7.25226	10.8012	3.70328	0.342857	-1.54432	0.387358	1
1656D_11026_c0_g1_i1	206	1656C;1656D	4	1	4	1	4.38415	1.16068	2.62316	4.32049	0.92582	0.214286	-2.22239	0.452547	1
1656D_11027_c0_g1_i1	283	1656C;1656D	2	9	2	9	1.25722	6.03256	5.24631	2.16025	8.33238	3.85714	1.94753	0.347706	1
1656D_11032_c0_g1_i1	208	1656C;1656D	7	1	7	1	7.55084	1.13803	4.24334	7.56086	0.92582	0.122449	-3.02975	0.193965	1
1656D_11035_c0_g1_i1	359	1656C;1656D	13	8	13	8	5.64592	3.66504	10.7241	14.0416	7.40656	0.527473	-0.922832	0.573516	1
1656D_11036_c0_g1_i1	206	1656C;1656D	1	5	1	5	1.09604	5.80338	2.85461	1.08012	4.6291	4.28571	2.09954	0.472704	1
1656D_11037_c0_g1_i1	215	1656C;1656D	3	2	3	2	3.03585	2.13651	2.54601	3.24037	1.85164	0.571429	-0.807355	0.902082	1
1656D_1103_c0_g1_i1	212	1656C;1656D	4	4	4	4	4.15408	4.39009	4.01189	4.32049	3.70328	0.857143	-0.222392	1	1
1656D_11040_c0_g1_i1	272	1656C;1656D	5	1	5	1	3.36864	0.716172	3.16322	5.40062	0.92582	0.171429	-2.54432	0.332471	1
1656D_11044_c0_g1_i1	222	1656C;1656D	4	6	4	6	3.80652	6.05413	4.93771	4.32049	5.55492	1.28571	0.36257	0.968366	1
1656D_11045_c0_g1_i1	233	1656C;1656D	2	4	2	4	1.74487	3.72006	2.93176	2.16025	3.70328	1.71429	0.777608	0.88701	1
1656D_11047_c0_g1_i1	231	1656C;1656D	8	1	8	1	7.06693	0.940852	4.7834	8.64099	0.92582	0.107143	-3.22239	0.152555	1
1656D_11049_c0_g1_i1	331	1656C;1656D	11	2	11	2	5.41593	1.04743	6.8665	11.8814	1.85164	0.155844	-2.68182	0.154152	1
1656D_11050_c0_g1_i1	647	1656C;1656D	17	10	17	10	2.64837	1.57101	13.8101	18.3621	9.2582	0.504202	-0.987927	0.510545	1
1656D_11051_c0_g2_i1	313	1656C;1656D	2	2	2	2	1.07385	1.14165	2.00594	2.16025	1.85164	0.857143	-0.222392	1	1
1656D_11052_c0_g1_i1	229	1656C;1656D	2	8	2	8	1.79788	7.63101	4.7834	2.16025	7.40656	3.42857	1.77761	0.412	1
1656D_11054_c0_g1_i1	221	1656C;1656D	1	5	1	5	0.961738	5.08103	2.85461	1.08012	4.6291	4.28571	2.09954	0.472704	1
1656D_11059_c0_g1_i1	221	1656C;1656D	4	2	4	2	3.84695	2.03241	3.08607	4.32049	1.85164	0.428571	-1.22239	0.688967	1
1656D_11061_c0_g1_i1	271	1656D	0	3	0	3	0	2.16045	1.38873	0	2.77746	-	-	0.428162	1
1656D_11061_c1_g1_i1	295	1656D	0	5	0	5	0	3.11951	2.31455	0	4.6291	-	-	0.210896	1
1656D_11064_c0_g1_i1	308	1656C;1656D	5	7	5	7	2.75691	4.09007	5.94068	5.40062	6.48074	1.2	0.263034	0.9921	1
1656D_11068_c0_g1_i1	441	1656C;1656D	4	8	4	8	1.23604	2.53795	5.86353	4.32049	7.40656	1.71429	0.777608	0.739051	1
1656D_11070_c0_g1_i1	360	1656C;1656D	3	5	3	5	1.297	2.27977	3.93474	3.24037	4.6291	1.42857	0.514573	0.935572	1
1656D_11072_c0_g1_i1	214	1656C;1656D	3	7	3	7	3.06732	7.53796	4.86056	3.24037	6.48074	2	1	0.677318	1
1656D_11074_c0_g1_i1	285	1656D	0	7	0	7	0	4.63252	3.24037	0	6.48074	-	-	0.119041	1
1656D_11075_c0_g1_i1	233	1656C;1656D	2	3	2	3	1.74487	2.79005	2.46885	2.16025	2.77746	1.28571	0.36257	1	1
1656D_11075_c1_g1_i1	251	1656C;1656D	1	4	1	4	0.772579	3.27604	2.3917	1.08012	3.70328	3.42857	1.77761	0.612428	1
1656D_11077_c0_g1_i1	203	1656C;1656D	2	4	2	4	2.26112	4.7497	2.93176	2.16025	3.70328	1.71429	0.777608	0.88701	1
1656D_1107_c0_g1_i1	304	1656C;1656D	6	4	6	4	3.3695	2.39215	5.09201	6.48074	3.70328	0.571429	-0.807355	0.744312	1
1656D_11080_c0_g1_i1	718	1656C;1656D	10099	31838	10099	31838	1320	4211.99	20192.2	10908.2	29476.3	2.70222	1.43414	0.259346	1
1656D_11082_c1_g1_i1	259	1656C	7	0	7	0	5.11615	0	3.78043	7.56086	0	0	-	0.0727312	1
1656D_11085_c0_g1_i1	209	1656C;1656D	5	2	5	2	5.33531	2.25768	3.62613	5.40062	1.85164	0.342857	-1.54432	0.534519	1
1656D_11085_c1_g1_i1	254	1656C;1656D	3	2	3	2	2.27047	1.60323	2.54601	3.24037	1.85164	0.571429	-0.807355	0.902082	1
1656D_11087_c0_g1_i1	417	1656D	0	31	0	31	0	10.896	14.3502	0	28.7004	-	-	0.00321492	0.24195
1656D_11088_c0_g1_i1	225	1656C	6	0	6	0	5.5593	0	3.24037	6.48074	0	0	-	0.0984225	1
1656D_1108_c0_g1_i1	421	1656C;1656D	1	10	1	10	0.335664	3.45445	5.16916	1.08012	9.2582	8.57143	3.09954	0.165873	1
1656D_11090_c0_g1_i1	441	1656C;1656D	4	12	4	12	1.23604	3.80693	7.71517	4.32049	11.1098	2.57143	1.36257	0.448008	1
1656D_11090_c1_g1_i1	325	1656C;1656D	6	6.00778	6	6	3.04311	3.23566	6.01783	6.48074	5.55492	0.857143	-0.222392	1	1
1656D_11093_c0_g1_i1	448	1656C;1656D	9	3	9	3	2.70776	0.923196	6.24929	9.72111	2.77746	0.285714	-1.80735	0.335959	1
1656D_11096_c1_g1_i1	295	1656C;1656D	8	2	8	2	4.69698	1.2478	5.24631	8.64099	1.85164	0.214286	-2.22239	0.2727	1
1656D_11097_c0_g1_i1	221	1656C;1656D	5	1	5	1	4.80869	1.01621	3.16322	5.40062	0.92582	0.171429	-2.54432	0.332471	1
1656D_11098_c0_g1_i1	399	1656C;1656D	1	6	1	6	0.367336	2.29027	3.31752	1.08012	5.55492	5.14286	2.36257	0.372187	1
1656D_11098_c1_g1_i1	422	1656C;1656D	11	27	11	27	3.67686	9.28749	18.4393	11.8814	24.9971	2.1039	1.07306	0.442208	1
1656D_1109_c0_g1_i1	220	1656C;1656D	3	2	3	2	2.91369	2.04392	2.54601	3.24037	1.85164	0.571429	-0.807355	0.902082	1
1656D_11102_c0_g1_i1	220	1656C;1656D	1	3	1	3	0.971229	3.06587	1.92879	1.08012	2.77746	2.57143	1.36257	0.808713	1
1656D_11102_c1_g1_i1	274	1656C;1656D	2	3	2	3	1.33097	2.12059	2.46885	2.16025	2.77746	1.28571	0.36257	1	1
1656D_11103_c0_g1_i1	231	1656C;1656D	6	2	6	2	5.3002	1.8817	4.16619	6.48074	1.85164	0.285714	-1.80735	0.421356	1
1656D_11107_c0_g1_i1	238	1656C;1656D	3	4	3	4	2.5302	3.59081	3.47183	3.24037	3.70328	1.14286	0.192645	1	1
1656D_1110_c0_g1_i1	267	1656C;1656D	5	4	5	4	3.47018	2.94315	4.55195	5.40062	3.70328	0.685714	-0.544321	0.888737	1
1656D_11110_c0_g1_i1	502	1656C;1656D	8	11	8	11	1.96676	2.73208	9.4125	8.64099	10.184	1.17857	0.237039	0.954267	1
1656D_11111_c0_g1_i1	307	1656C;1656D	11	1	11	1	6.09725	0.586726	6.40359	11.8814	0.92582	0.0779221	-3.68182	0.0805832	1
1656D_11112_c0_g1_i1	355	1656C;1656D	10	2	10	2	4.41823	0.933639	6.32644	10.8012	1.85164	0.171429	-2.54432	0.184621	1
1656D_11113_c0_g1_i1	294	1656C;1656D	3	6	3	6	1.77283	3.76904	4.39765	3.24037	5.55492	1.71429	0.777608	0.793982	1
1656D_11114_c0_g1_i1	223	1656C;1656D	2	6	2	6	1.88405	6.00304	3.85758	2.16025	5.55492	2.57143	1.36257	0.59295	1
1656D_11115_c0_g1_i1	226	1656C;1656D	8	8	8	8	7.34991	7.79188	8.02377	8.64099	7.40656	0.857143	-0.222392	0.97638	1
1656D_11116_c0_g1_i1	241	1656D	0	7	0	7	0	6.15069	3.24037	0	6.48074	-	-	0.119041	1
1656D_11117_c0_g1_i1	207	1656D	0	8	0	8	0	9.19091	3.70328	0	7.40656	-	-	0.0931956	1
1656D_11119_c0_g1_i1	248	1656C;1656D	7	4	7	4	5.50765	3.33861	5.63207	7.56086	3.70328	0.489796	-1.02975	0.626625	1
1656D_1111_c0_g1_i1	248	1656C;1656D	4	1	4	1	3.14723	0.834651	2.62316	4.32049	0.92582	0.214286	-2.22239	0.452547	1
1656D_1111_c1_g1_i1	230	1656C	3	0	3	0	2.67324	0	1.62019	3.24037	0	0	-	0.316445	1
1656D_11120_c0_g1_i1	840	1656C;1656D	22	28	22	28	2.24551	2.90227	24.8428	23.7627	25.923	1.09091	0.125531	0.95587	1
1656D_11122_c0_g1_i1	375	1656C;1656D	3	13	3	13	1.21552	5.52982	7.63802	3.24037	12.0357	3.71429	1.89308	0.290968	1
1656D_11124_c0_g1_i1	330	1656C;1656D	4	3	4	3	1.978	1.5779	3.54898	4.32049	2.77746	0.642857	-0.63743	0.894145	1
1656D_11126_c0_g1_i1	311	1656C;1656D	2	8	2	8	1.08672	4.60248	4.7834	2.16025	7.40656	3.42857	1.77761	0.412	1
1656D_11127_c0_g1_i1	219	1656C;1656D	4	2	4	2	3.92839	2.05906	3.08607	4.32049	1.85164	0.428571	-1.22239	0.688967	1
1656D_11129_c0_g1_i1	239	1656C;1656D	3	6	3	6	2.50925	5.34852	4.39765	3.24037	5.55492	1.71429	0.777608	0.793982	1
1656D_11130_c0_g1_i1	234	1656C;1656D	3	5	3	5	2.59773	4.60966	3.93474	3.24037	4.6291	1.42857	0.514573	0.935572	1
1656D_11132_c0_g1_i1	220	1656C;1656D	1	1	1	1	0.971229	1.02196	1.00297	1.08012	0.92582	0.857143	-0.222392	1	1
1656D_11132_c1_g1_i1	283	1656C;1656D	1	5	1	5	0.628612	3.35142	2.85461	1.08012	4.6291	4.28571	2.09954	0.472704	1
1656D_11135_c0_g1_i1	228	1656C;1656D	5	3	5	3	4.52975	2.87947	4.08904	5.40062	2.77746	0.514286	-0.959358	0.722412	1
1656D_11137_c0_g1_i1	226	1656C;1656D	8	3	8	3	7.34991	2.92195	5.70922	8.64099	2.77746	0.321429	-1.63743	0.40164	1
1656D_11138_c0_g1_i1	489	1656C;1656D	7	2	7	2	1.80646	0.522164	4.70625	7.56086	1.85164	0.244898	-2.02975	0.336922	1
1656D_1113_c0_g1_i1	253	1656C	7	0	7	0	5.32961	0	3.78043	7.56086	0	0	-	0.0727312	1
1656D_11141_c0_g1_i1	228	1656C;1656D	4	3	4	3	3.6238	2.87947	3.54898	4.32049	2.77746	0.642857	-0.63743	0.894145	1
1656D_11143_c0_g1_i1	252	1656C;1656D	4	4	4	4	3.06528	3.25348	4.01189	4.32049	3.70328	0.857143	-0.222392	1	1
1656D_11146_c0_g1_i1	428	1656C;1656D	6	12	6	12	1.95482	4.0253	8.79529	6.48074	11.1098	1.71429	0.777608	0.67545	1
1656D_11147_c0_g1_i1	342	1656C;1656D	1	10	1	10	0.469696	4.96346	5.16916	1.08012	9.2582	8.57143	3.09954	0.165873	1
1656D_11148_c0_g1_i1	241	1656C;1656D	2	8	2	8	1.64769	7.02936	4.7834	2.16025	7.40656	3.42857	1.77761	0.412	1
1656D_11149_c0_g1_i1	225	1656C;1656D	3	3	3	3	2.77965	2.94856	3.00892	3.24037	2.77746	0.857143	-0.222392	1	1
1656D_1114_c0_g1_i1	230	1656C;1656D	4	2	4	2	3.56432	1.89742	3.08607	4.32049	1.85164	0.428571	-1.22239	0.688967	1
1656D_11150_c0_g1_i1	306	1656C;1656D	5	6	5	6	2.78385	3.54361	5.47777	5.40062	5.55492	1.02857	0.040642	1	1
1656D_11152_c0_g1_i1	233	1656C;1656D	5	2	5	2	4.36217	1.86003	3.62613	5.40062	1.85164	0.342857	-1.54432	0.534519	1
1656D_11154_c0_g1_i1	204	1656C	1	0	1	0	1.12161	0	0.540062	1.08012	0	0	-	0.940866	1
1656D_11154_c1_g1_i1	235	1656C;1656D	5	2	5	2	4.30184	1.828	3.62613	5.40062	1.85164	0.342857	-1.54432	0.534519	1
1656D_11159_c0_g1_i1	362	1656C;1656D	9	6	9	6	3.85403	2.70863	7.63802	9.72111	5.55492	0.571429	-0.807355	0.676178	1
1656D_1115_c0_g1_i1	1019	1656C;1656D	44	35	44	35	3.39373	2.75134	39.9646	47.5254	32.4037	0.681818	-0.552541	0.64497	1
1656D_1115_c1_g1_i1	220	1656D	0	1	0	1	0	1.02196	0.46291	0	0.92582	-	-	1	1
1656D_11160_c0_g1_i1	1426	1656C;1656D	9332	5595	9332	5595	462.615	283.797	7629.84	10079.7	5179.96	0.5139	-0.960441	0.321614	1
1656D_11163_c0_g1_i1	383	1656C;1656D	10	1	10	1	3.92055	0.410469	5.86353	10.8012	0.92582	0.0857143	-3.54432	0.0984265	1
1656D_11164_c0_g1_i1	284	1656C;1656D	6	1	6	1	3.7513	0.665164	3.70328	6.48074	0.92582	0.142857	-2.80735	0.251097	1
1656D_11165_c0_g1_i1	263	1656C;1656D	2	5	2	5	1.42403	3.77674	3.39467	2.16025	4.6291	2.14286	1.09954	0.721617	1
1656D_11165_c1_g1_i1	201	1656C;1656D	5	1	5	1	5.76844	1.21296	3.16322	5.40062	0.92582	0.171429	-2.54432	0.332471	1
1656D_11166_c0_g1_i1	220	1656C;1656D	7	1	7	1	6.79861	1.02196	4.24334	7.56086	0.92582	0.122449	-3.02975	0.193965	1
1656D_11166_c1_g1_i1	373	1656C;1656D	4	4	4	4	1.6359	1.71646	4.01189	4.32049	3.70328	0.857143	-0.222392	1	1
1656D_11168_c0_g1_i1	254	1656C;1656D	5	2	5	2	3.78411	1.60323	3.62613	5.40062	1.85164	0.342857	-1.54432	0.534519	1
1656D_11168_c1_g1_i1	258	1656C;1656D	2	5	2	5	1.47443	3.89721	3.39467	2.16025	4.6291	2.14286	1.09954	0.721617	1
1656D_11169_c1_g1_i1	235	1656C;1656D	1	2	1	2	0.860367	1.828	1.46588	1.08012	1.85164	1.71429	0.777608	1	1
1656D_1116_c0_g1_i1	241	1656C;1656D	11	3	11	3	9.06227	2.63601	7.32941	11.8814	2.77746	0.233766	-2.09686	0.240473	1
1656D_11171_c0_g1_i1	357	1656C;1656D	2	11	2	11	0.876355	5.08409	6.17213	2.16025	10.184	4.71429	2.23704	0.253151	1
1656D_11173_c0_g1_i1	601	1656C;1656D	11	11	11	11	1.95024	1.96572	11.0327	11.8814	10.184	0.857143	-0.222392	0.946597	1
1656D_11173_c1_g1_i1	207	1656C;1656D	1	1	1	1	1.08587	1.14886	1.00297	1.08012	0.92582	0.857143	-0.222392	1	1
1656D_11175_c0_g1_i1	375	1656C;1656D	7	6	7	6	2.8362	2.55222	6.55789	7.56086	5.55492	0.734694	-0.444785	0.881029	1
1656D_11179_c0_g1_i1	264	1656C;1656D	4	5	4	5	2.82568	3.74817	4.4748	4.32049	4.6291	1.07143	0.0995357	1	1
1656D_1117_c0_g1_i1	214	1656C;1656D	1	2	1	2	1.02244	2.1537	1.46588	1.08012	1.85164	1.71429	0.777608	1	1
1656D_1117_c1_g1_i1	208	1656C;1656D	2	1	2	1	2.15738	1.13803	1.54303	2.16025	0.92582	0.428571	-1.22239	0.915332	1
1656D_11180_c0_g1_i1	210	1656C;1656D	4	2	4	2	4.23629	2.23738	3.08607	4.32049	1.85164	0.428571	-1.22239	0.688967	1
1656D_11181_c0_g1_i1	338	1656C;1656D	6	17	6	17	2.86591	8.5984	11.1098	6.48074	15.7389	2.42857	1.28011	0.422298	1
1656D_11183_c0_g1_i1	233	1656C;1656D	2	8	2	8	1.74487	7.44012	4.7834	2.16025	7.40656	3.42857	1.77761	0.412	1
1656D_11185_c0_g1_i1	285	1656C;1656D	6	2	6	2	3.73183	1.32358	4.16619	6.48074	1.85164	0.285714	-1.80735	0.421356	1
1656D_11187_c0_g1_i1	207	1656C;1656D	3	6	3	6	3.25762	6.89319	4.39765	3.24037	5.55492	1.71429	0.777608	0.793982	1
1656D_11193_c0_g1_i1	310	1656C;1656D	7	2	7	2	3.82142	1.15661	4.70625	7.56086	1.85164	0.244898	-2.02975	0.336922	1
1656D_11198_c0_g1_i1	469	1656C;1656D	8	7	8	7	2.22651	1.97761	7.56086	8.64099	6.48074	0.75	-0.415037	0.878186	1
1656D_11199_c0_g1_i1	826	1656C;1656D	10	19	10	19	1.04719	2.01956	14.1959	10.8012	17.5906	1.62857	0.703607	0.652727	1
1656D_1119_c0_g1_i1	322	1656C;1656D	10	3	10	3	5.15097	1.63615	6.78935	10.8012	2.77746	0.257143	-1.95936	0.283228	1
1656D_11200_c0_g1_i1	307	1656C;1656D	5	6	5	6	2.77148	3.52036	5.47777	5.40062	5.55492	1.02857	0.040642	1	1
1656D_11202_c0_g1_i1	291	1656C;1656D	3	2	3	2	1.79991	1.27759	2.54601	3.24037	1.85164	0.571429	-0.807355	0.902082	1
1656D_11202_c1_g1_i1	365	1656D	0	9	0	9	0	4.00264	4.16619	0	8.33238	-	-	0.0743623	1
1656D_11205_c0_g1_i1	215	1656D	0	6	0	6	0	6.40952	2.77746	0	5.55492	-	-	0.155871	1
1656D_11206_c0_g1_i1	211	1656C;1656D	3	2	3	2	3.14156	2.21812	2.54601	3.24037	1.85164	0.571429	-0.807355	0.902082	1
1656D_11207_c0_g1_i1	206	1656C;1656D	9	2	9	2	9.86433	2.32135	5.78638	9.72111	1.85164	0.190476	-2.39232	0.223188	1
1656D_1120_c0_g1_i1	232	1656C;1656D	3	1	3	1	2.63504	0.934329	2.0831	3.24037	0.92582	0.285714	-1.80735	0.635182	1
1656D_1120_c1_g1_i1	303	1656C;1656D	7	6	7	6	3.94742	3.60895	6.55789	7.56086	5.55492	0.734694	-0.444785	0.881029	1
1656D_11210_c0_g1_i1	373	1656C;1656D	5	8	5	8	2.04487	3.43291	6.40359	5.40062	7.40656	1.37143	0.455679	0.882513	1
1656D_11211_c0_g1_i1	493	1656C;1656D	9	7	9	7	2.28928	1.79962	8.10093	9.72111	6.48074	0.666667	-0.584963	0.779495	1
1656D_11212_c0_g1_i1	1683	1656C;1656D	80	91	80	91	3.23582	3.7711	85.3298	86.4099	84.2496	0.975	-0.0365259	0.984062	1
1656D_11215_c0_g1_i1	275	1656C;1656D	4	1	4	1	2.64394	0.702368	2.62316	4.32049	0.92582	0.214286	-2.22239	0.452547	1
1656D_11216_c0_g1_i1	201	1656C;1656D	3	2	3	2	3.46106	2.42593	2.54601	3.24037	1.85164	0.571429	-0.807355	0.902082	1
1656D_11218_c0_g1_i1	301	1656C;1656D	4	7	4	7	2.27651	4.25475	5.40062	4.32049	6.48074	1.5	0.584963	0.844754	1
1656D_11221_c0_g1_i1	470	1656C;1656D	11	3	11	3	3.05004	0.843899	7.32941	11.8814	2.77746	0.233766	-2.09686	0.240473	1
1656D_11222_c0_g1_i1	220	1656C;1656D	2	2	2	2	1.94246	2.04392	2.00594	2.16025	1.85164	0.857143	-0.222392	1	1
1656D_11223_c0_g2_i1	243	1656C;1656D	4	6	4	6	3.25431	5.19634	4.93771	4.32049	5.55492	1.28571	0.36257	0.968366	1
1656D_11226_c0_g1_i1	653	1656C;1656D	11	30	11	30	1.68642	4.64021	19.828	11.8814	27.7746	2.33766	1.22507	0.370314	1
1656D_11228_c0_g1_i1	243	1656C	9	0	9	0	7.3222	0	4.86056	9.72111	0	0	-	0.0428041	0.945471
1656D_11230_c0_g1_i1	459	1656C;1656D	15	67	15	67	4.33089	19.7085	39.1159	16.2019	62.0299	3.82857	1.93681	0.108212	1
1656D_11231_c0_g1_i1	253	1656C	3	0	3	0	2.28412	0	1.62019	3.24037	0	0	-	0.316445	1
1656D_11231_c1_g1_i1	363	1656C;1656D	5	3	5	3	2.13188	1.34817	4.08904	5.40062	2.77746	0.514286	-0.959358	0.722412	1
1656D_11233_c0_g1_i1	390	1656C;1656D	3	5	3	5	1.14312	1.98707	3.93474	3.24037	4.6291	1.42857	0.514573	0.935572	1
1656D_11236_c0_g1_i1	230	1656C;1656D	3	3	3	3	2.67324	2.84614	3.00892	3.24037	2.77746	0.857143	-0.222392	1	1
1656D_11237_c0_g1_i1	202	1656C;1656D	1	6	1	6	1.14201	7.18398	3.31752	1.08012	5.55492	5.14286	2.36257	0.372187	1
1656D_11238_c0_g1_i1	1186	1656C;1656D	169	174	169	174	10.614	11.1605	171.817	182.541	161.093	0.882502	-0.180328	0.844036	1
1656D_11239_c0_g1_i1	206	1656D	0	6	0	6	0	6.96405	2.77746	0	5.55492	-	-	0.155871	1
1656D_1123_c0_g1_i1	264	1656C;1656D	1	6	1	6	0.70642	4.4978	3.31752	1.08012	5.55492	5.14286	2.36257	0.372187	1
1656D_11240_c0_g1_i1	520	1656C;1656D	11	6	11	6	2.53133	1.3959	8.71814	11.8814	5.55492	0.467532	-1.09686	0.524716	1
1656D_11241_c0_g1_i1	378	1656C;1656D	5	12	5	12	2.00381	5.03503	8.25523	5.40062	11.1098	2.05714	1.04064	0.563909	1
1656D_11242_c0_g1_i1	255	1656C;1656D	5	2	5	2	3.75659	1.59415	3.62613	5.40062	1.85164	0.342857	-1.54432	0.534519	1
1656D_11243_c0_g1_i1	479	1656C;1656D	16	8	16	8	4.27998	2.17039	12.3443	17.282	7.40656	0.428571	-1.22239	0.42393	1
1656D_11245_c0_g1_i1	511	1656C;1656D	6	8	6	8	1.42632	1.92298	6.94365	6.48074	7.40656	1.14286	0.192645	1	1
1656D_11246_c0_g1_i1	388	1656C;1656D	5	12	5	12	1.92329	4.81134	8.25523	5.40062	11.1098	2.05714	1.04064	0.563909	1
1656D_11247_c0_g1_i1	242	1656C	6	0	6	0	4.91513	0	3.24037	6.48074	0	0	-	0.0984225	1
1656D_11248_c1_g1_i1	281	1656C;1656D	1	2	1	2	0.636371	1.35554	1.46588	1.08012	1.85164	1.71429	0.777608	1	1
1656D_1124_c0_g1_i1	285	1656C;1656D	2	5	2	5	1.24394	3.30894	3.39467	2.16025	4.6291	2.14286	1.09954	0.721617	1
1656D_11251_c0_g1_i1	239	1656C;1656D	5	2	5	2	4.18208	1.78284	3.62613	5.40062	1.85164	0.342857	-1.54432	0.534519	1
1656D_11252_c0_g1_i1	419	1656C;1656D	6	8	6	8	2.0306	2.78826	6.94365	6.48074	7.40656	1.14286	0.192645	1	1
1656D_11255_c0_g2_i1	460	1656C;1656D	6	8	6	8	1.72618	2.34267	6.94365	6.48074	7.40656	1.14286	0.192645	1	1
1656D_11255_c1_g1_i1	374	1656C;1656D	2	8	2	8	0.813861	3.41913	4.7834	2.16025	7.40656	3.42857	1.77761	0.412	1
1656D_11258_c0_g1_i1	545	1656C;1656D	25	29	25	29	5.28256	6.18826	26.9259	27.0031	26.8488	0.994286	-0.00826762	1	1
1656D_11259_c0_g1_i1	353	1656C;1656D	3	10	3	10	1.33716	4.70808	6.24929	3.24037	9.2582	2.85714	1.51457	0.434072	1
1656D_1125_c0_g1_i1	735	1656C;1656D	94	57	94	57	11.8294	7.26093	77.1517	101.532	52.7717	0.519757	-0.944091	0.36047	1
1656D_11261_c0_g1_i1	219	1656C;1656D	3	1	3	1	2.94629	1.02953	2.0831	3.24037	0.92582	0.285714	-1.80735	0.635182	1
1656D_11262_c0_g1_i1	229	1656C;1656D	8	2	8	2	7.19154	1.90775	5.24631	8.64099	1.85164	0.214286	-2.22239	0.2727	1
1656D_11263_c0_g1_i1	539	1656C;1656D	8	8	8	8	1.72386	1.74281	8.02377	8.64099	7.40656	0.857143	-0.222392	0.97638	1
1656D_11264_c0_g1_i1	267	1656C;1656D	5	2	5	2	3.47018	1.47158	3.62613	5.40062	1.85164	0.342857	-1.54432	0.534519	1
1656D_11266_c0_g1_i1	217	1656C;1656D	5	2	5	2	4.97452	2.08979	3.62613	5.40062	1.85164	0.342857	-1.54432	0.534519	1
1656D_11270_c0_g2_i1	297	1656C;1656D	24	34	24	34	13.9383	21.0023	28.7004	25.923	31.4779	1.21429	0.280108	0.845801	1
1656D_11272_c0_g1_i1	244	1656C;1656D	3	3	3	3	2.4247	2.57572	3.00892	3.24037	2.77746	0.857143	-0.222392	1	1
1656D_11273_c0_g1_i1	329	1656C;1656D	5	3	5	3	2.48634	1.58426	4.08904	5.40062	2.77746	0.514286	-0.959358	0.722412	1
1656D_11273_c1_g1_i1	232	1656C;1656D	4	1	4	1	3.51339	0.934329	2.62316	4.32049	0.92582	0.214286	-2.22239	0.452547	1
1656D_11274_c0_g1_i1	240	1656C;1656D	7	1	7	1	5.79969	0.884787	4.24334	7.56086	0.92582	0.122449	-3.02975	0.193965	1
1656D_11275_c0_g1_i1	267	1656C;1656D	4	5	4	5	2.77614	3.67894	4.4748	4.32049	4.6291	1.07143	0.0995357	1	1
1656D_11276_c0_g1_i1	201	1656C;1656D	1	5	1	5	1.15369	6.06482	2.85461	1.08012	4.6291	4.28571	2.09954	0.472704	1
1656D_11277_c0_g1_i1	745	1656C;1656D	17	7	17	7	2.09355	0.87268	12.4214	18.3621	6.48074	0.352941	-1.5025	0.322049	1
1656D_11277_c1_g1_i1	319	1656C;1656D	7	2	7	2	3.65887	1.10824	4.70625	7.56086	1.85164	0.244898	-2.02975	0.336922	1
1656D_11278_c0_g1_i1	214	1656C;1656D	3	3	3	3	3.06732	3.23055	3.00892	3.24037	2.77746	0.857143	-0.222392	1	1
1656D_11280_c0_g1_i1	210	1656C	6	0	6	0	6.35444	0	3.24037	6.48074	0	0	-	0.0984225	1
1656D_11281_c0_g1_i1	203	1656C;1656D	1	8	1	8	1.13056	9.4994	4.24334	1.08012	7.40656	6.85714	2.77761	0.242454	1
1656D_11282_c0_g2_i1	441	1656C;1656D	6	20	6	20	1.85406	6.34488	12.4986	6.48074	18.5164	2.85714	1.51457	0.324055	1
1656D_11283_c0_g1_i1	1217	1656C;1656D	51	14	51	14	3.0963	0.868302	34.0239	55.0863	12.9615	0.235294	-2.08746	0.0911134	1
1656D_11284_c0_g1_i1	408	1656C	21	0	21	0	7.42673	0	11.3413	22.6826	0	0	-	0.0047359	0.308747
1656D_11285_c0_g1_i1	298	1656C;1656D	8	4	8	4	4.62391	2.46461	6.17213	8.64099	3.70328	0.428571	-1.22239	0.530668	1
1656D_11286_c0_g1_i1	330	1656C;1656D	6	1	6	1	2.96699	0.525968	3.70328	6.48074	0.92582	0.142857	-2.80735	0.251097	1
1656D_11292_c0_g1_i1	289	1656C;1656D	6	3	6	3	3.64266	1.93938	4.6291	6.48074	2.77746	0.428571	-1.22239	0.58886	1
1656D_11293_c0_g1_i1	289	1656C;1656D	8	2	8	2	4.85688	1.29292	5.24631	8.64099	1.85164	0.214286	-2.22239	0.2727	1
1656D_11295_c0_g1_i1	267	1656D	0	9	0	9	0	6.62209	4.16619	0	8.33238	-	-	0.0743623	1
1656D_11296_c0_g1_i1	531	1656C;1656D	11	4	11	4	2.43574	0.895421	7.79232	11.8814	3.70328	0.311688	-1.68182	0.333675	1
1656D_11296_c1_g1_i1	258	1656C;1656D	2	1	2	1	1.47443	0.779442	1.54303	2.16025	0.92582	0.428571	-1.22239	0.915332	1
1656D_11297_c0_g1_i1	214	1656C;1656D	2	1	2	1	2.04488	1.07685	1.54303	2.16025	0.92582	0.428571	-1.22239	0.915332	1
1656D_11297_c1_g1_i1	312	1656C;1656D	2	2	2	2	1.08042	1.14559	2.00594	2.16025	1.85164	0.857143	-0.222392	1	1
1656D_11298_c0_g1_i1	241	1656C;1656D	3	2	3	2	2.47153	1.75734	2.54601	3.24037	1.85164	0.571429	-0.807355	0.902082	1
1656D_1129_c0_g1_i1	205	1656C;1656D	4	2	4	2	4.43763	2.33512	3.08607	4.32049	1.85164	0.428571	-1.22239	0.688967	1
1656D_112_c0_g1_i1	481	1656C;1656D	8	17	8	17	2.12419	4.5733	12.19	8.64099	15.7389	1.82143	0.86507	0.589082	1
1656D_11302_c0_g1_i1	206	1656C;1656D	4	3	4	3	4.38415	3.48203	3.54898	4.32049	2.77746	0.642857	-0.63743	0.894145	1
1656D_11305_c0_g2_i1	346	1656C;1656D	4	5	4	5	1.84209	2.43733	4.4748	4.32049	4.6291	1.07143	0.0995357	1	1
1656D_11305_c1_g1_i1	302	1656C;1656D	1	6	1	6	0.566756	3.62695	3.31752	1.08012	5.55492	5.14286	2.36257	0.372187	1
1656D_11306_c0_g1_i1	212	1656C;1656D	5	4	5	4	5.1926	4.39009	4.55195	5.40062	3.70328	0.685714	-0.544321	0.888737	1
1656D_11309_c0_g1_i1	411	1656C;1656D	2	7	2	7	0.699349	2.52565	4.32049	2.16025	6.48074	3	1.58496	0.492048	1
1656D_11309_c1_g1_i1	258	1656C;1656D	2	1	2	1	1.47443	0.779442	1.54303	2.16025	0.92582	0.428571	-1.22239	0.915332	1
1656D_11311_c0_g1_i1	478	1656C;1656D	8	5	8	5	2.14902	1.36242	6.63504	8.64099	4.6291	0.535714	-0.900464	0.654634	1
1656D_11312_c0_g1_i1	270	1656C;1656D	2	5	2	5	1.36352	3.61152	3.39467	2.16025	4.6291	2.14286	1.09954	0.721617	1
1656D_11314_c0_g1_i1	854	1656C;1656D	1	202	1	202	0.0995695	20.4284	94.0479	1.08012	187.016	173.143	7.43582	1.00178e-06	0.000578636
1656D_11316_c0_g1_i1	214	1656C;1656D	1	1	1	1	1.02244	1.07685	1.00297	1.08012	0.92582	0.857143	-0.222392	1	1
1656D_11316_c1_g1_i1	253	1656C;1656D	1	3	1	3	0.761372	2.425	1.92879	1.08012	2.77746	2.57143	1.36257	0.808713	1
1656D_11317_c0_g1_i1	421	1656C;1656D	6	2	6	2	2.01399	0.69089	4.16619	6.48074	1.85164	0.285714	-1.80735	0.421356	1
1656D_11317_c1_g1_i1	256	1656C;1656D	4	1	4	1	2.98294	0.791386	2.62316	4.32049	0.92582	0.214286	-2.22239	0.452547	1
1656D_11318_c0_g1_i1	383	1656C;1656D	11	7	11	7	4.31261	2.87328	9.18105	11.8814	6.48074	0.545455	-0.874469	0.617563	1
1656D_11319_c0_g1_i1	238	1656C;1656D	3	2	3	2	2.5302	1.79541	2.54601	3.24037	1.85164	0.571429	-0.807355	0.902082	1
1656D_11319_c1_g1_i1	202	1656C	1	0	1	0	1.14201	0	0.540062	1.08012	0	0	-	0.940866	1
1656D_1131_c0_g1_i1	271	1656C;1656D	2	4	2	4	1.35544	2.8806	2.93176	2.16025	3.70328	1.71429	0.777608	0.88701	1
1656D_11320_c0_g1_i1	395	1656C	11	0	11	0	4.1083	0	5.94068	11.8814	0	0	-	0.0269418	0.789742
1656D_11322_c0_g1_i1	219	1656D	0	4	0	4	0	4.11812	1.85164	0	3.70328	-	-	0.295121	1
1656D_11323_c0_g1_i1	1181	1656C;1656D	593.74	475.136	594	475	37.4983	30.6444	540.679	641.593	439.765	0.685426	-0.544928	0.49018	1
1656D_11323_c0_g2_i1	1602	1656C;1656D	92.26	111.864	92	112	3.96154	4.91948	101.532	99.3714	103.692	1.04348	0.0614005	0.96079	1
1656D_11324_c0_g1_i1	211	1656D	0	6	0	6	0	6.65435	2.77746	0	5.55492	-	-	0.155871	1
1656D_11325_c0_g1_i1	501	1656C;1656D	2	11	2	11	0.493529	2.74122	6.17213	2.16025	10.184	4.71429	2.23704	0.253151	1
1656D_11325_c1_g1_i1	247	1656C;1656D	2	4	2	4	1.58038	3.36692	2.93176	2.16025	3.70328	1.71429	0.777608	0.88701	1
1656D_11328_c0_g1_i1	300	1656C;1656D	1	4	1	4	0.572015	2.4411	2.3917	1.08012	3.70328	3.42857	1.77761	0.612428	1
1656D_1132_c0_g1_i1	405	1656C;1656D	6	10	6	10	2.14902	3.71057	7.86947	6.48074	9.2582	1.42857	0.514573	0.823856	1
1656D_11331_c0_g1_i1	300	1656C	8	0	8	0	4.57612	0	4.32049	8.64099	0	0	-	0.0552302	1
1656D_11332_c0_g1_i1	307	1656C;1656D	6	8	6	8	3.32577	4.69381	6.94365	6.48074	7.40656	1.14286	0.192645	1	1
1656D_11333_c0_g1_i1	661	1656C;1656D	12	13	12	13	1.80188	1.97007	12.4986	12.9615	12.0357	0.928571	-0.106915	1	1
1656D_11334_c0_g1_i1	358	1656C;1656D	5	8	5	8	2.18175	3.68025	6.40359	5.40062	7.40656	1.37143	0.455679	0.882513	1
1656D_11335_c0_g1_i1	206	1656C;1656D	4	3	4	3	4.38415	3.48203	3.54898	4.32049	2.77746	0.642857	-0.63743	0.894145	1
1656D_11337_c0_g1_i1	228	1656D	0	5	0	5	0	4.79911	2.31455	0	4.6291	-	-	0.210896	1
1656D_11339_c0_g1_i1	282	1656C;1656D	6	3	6	3	3.79153	2.02202	4.6291	6.48074	2.77746	0.428571	-1.22239	0.58886	1
1656D_11340_c0_g1_i1	316	1656C;1656D	4	5	4	5	2.12213	2.81318	4.4748	4.32049	4.6291	1.07143	0.0995357	1	1
1656D_11341_c0_g1_i1	227	1656C	4	0	4	0	3.65329	0	2.16025	4.32049	0	0	-	0.204074	1
1656D_11341_c1_g1_i1	271	1656C	7	0	7	0	4.74404	0	3.78043	7.56086	0	0	-	0.0727312	1
1656D_11342_c0_g1_i1	310	1656C;1656D	1	3	1	3	0.545917	1.73491	1.92879	1.08012	2.77746	2.57143	1.36257	0.808713	1
1656D_11342_c1_g1_i1	370	1656C;1656D	2	9	2	9	0.826962	3.91822	5.24631	2.16025	8.33238	3.85714	1.94753	0.347706	1
1656D_11348_c0_g1_i1	297	1656C;1656D	1	5	1	5	0.580761	3.08857	2.85461	1.08012	4.6291	4.28571	2.09954	0.472704	1
1656D_11349_c0_g1_i1	607	1656C;1656D	52	37	52	37	9.06329	6.49623	45.2109	56.1664	34.2553	0.60989	-0.713379	0.536658	1
1656D_1134_c0_g1_i1	229	1656C;1656D	7	1	7	1	6.2926	0.953876	4.24334	7.56086	0.92582	0.122449	-3.02975	0.193965	1
1656D_11351_c0_g1_i1	231	1656C	1.33502	0	1	0	1.17932	0	0.540062	1.08012	0	0	-	0.940866	1
1656D_11351_c0_g2_i1	232	1656C;1656D	2.66498	1	3	1	2.34077	0.934329	2.0831	3.24037	0.92582	0.285714	-1.80735	0.635182	1
1656D_11352_c0_g1_i1	241	1656D	0	5	0	5	0	4.39335	2.31455	0	4.6291	-	-	0.210896	1
1656D_11353_c0_g1_i1	303	1656D	0	4	0	4	0	2.40597	1.85164	0	3.70328	-	-	0.295121	1
1656D_11353_c1_g1_i1	313	1656C;1656D	1	2	1	2	0.536927	1.14165	1.46588	1.08012	1.85164	1.71429	0.777608	1	1
1656D_11354_c0_g1_i1	462	1656C;1656D	7	7	7	7	1.99963	2.03437	7.0208	7.56086	6.48074	0.857143	-0.222392	0.990747	1
1656D_11355_c0_g1_i1	214	1656C;1656D	1	4	1	4	1.02244	4.3074	2.3917	1.08012	3.70328	3.42857	1.77761	0.612428	1
1656D_11356_c0_g1_i1	214	1656C;1656D	4	7	4	7	4.08976	7.53796	5.40062	4.32049	6.48074	1.5	0.584963	0.844754	1
1656D_11357_c0_g1_i1	208	1656C	1	0	1	0	1.07869	0	0.540062	1.08012	0	0	-	0.940866	1
1656D_11358_c0_g1_i1	265	1656C	5	0	5	0	3.50754	0	2.70031	5.40062	0	0	-	0.138223	1
1656D_1135_c0_g1_i1	268	1656C	6	0	6	0	4.14421	0	3.24037	6.48074	0	0	-	0.0984225	1
1656D_11361_c0_g1_i1	204	1656C;1656D	1	2	1	2	1.12161	2.35446	1.46588	1.08012	1.85164	1.71429	0.777608	1	1
1656D_11362_c0_g1_i1	253	1656C;1656D	4	3	4	3	3.04549	2.425	3.54898	4.32049	2.77746	0.642857	-0.63743	0.894145	1
1656D_11364_c0_g1_i1	240	1656C;1656D	2	7	2	7	1.65705	6.19351	4.32049	2.16025	6.48074	3	1.58496	0.492048	1
1656D_11365_c0_g1_i1	208	1656C;1656D	5	2	5	2	5.39346	2.27607	3.62613	5.40062	1.85164	0.342857	-1.54432	0.534519	1
1656D_11366_c0_g1_i1	250	1656C;1656D	4	2	4	2	3.11364	1.64833	3.08607	4.32049	1.85164	0.428571	-1.22239	0.688967	1
1656D_11367_c0_g1_i1	325	1656D	0	10	0	10	0	5.38578	4.6291	0	9.2582	-	-	0.0602193	1
1656D_11369_c0_g1_i1	326	1656C;1656D	7	2	7	2	3.53117	1.07258	4.70625	7.56086	1.85164	0.244898	-2.02975	0.336922	1
1656D_1136_c0_g1_i1	246	1656C;1656D	2	2	2	2	1.59285	1.68997	2.00594	2.16025	1.85164	0.857143	-0.222392	1	1
1656D_1136_c1_g1_i1	223	1656C;1656D	5	1	5	1	4.71012	1.00051	3.16322	5.40062	0.92582	0.171429	-2.54432	0.332471	1
1656D_11371_c0_g1_i1	278	1656C;1656D	4	2	4	2	2.59494	1.3744	3.08607	4.32049	1.85164	0.428571	-1.22239	0.688967	1
1656D_11372_c0_g1_i1	305	1656C;1656D	11	4	11	4	6.15293	2.3766	7.79232	11.8814	3.70328	0.311688	-1.68182	0.333675	1
1656D_11374_c1_g1_i1	222	1656C	3	0	3	0	2.85489	0	1.62019	3.24037	0	0	-	0.316445	1
1656D_11375_c0_g1_i1	485	1656C;1656D	3	10	3	10	0.786167	2.64984	6.24929	3.24037	9.2582	2.85714	1.51457	0.434072	1
1656D_11376_c0_g1_i1	272	1656C;1656D	1	8	1	8	0.673727	5.72938	4.24334	1.08012	7.40656	6.85714	2.77761	0.242454	1
1656D_11377_c0_g1_i1	246	1656C;1656D	2	9	2	9	1.59285	7.60487	5.24631	2.16025	8.33238	3.85714	1.94753	0.347706	1
1656D_11378_c0_g1_i1	221	1656D	0	1	0	1	0	1.01621	0.46291	0	0.92582	-	-	1	1
1656D_1137_c0_g1_i1	322	1656C;1656D	9	2	9	2	4.63587	1.09077	5.78638	9.72111	1.85164	0.190476	-2.39232	0.223188	1
1656D_11380_c0_g1_i1	368	1656C;1656D	3	4	3	4	1.25119	1.7561	3.47183	3.24037	3.70328	1.14286	0.192645	1	1
1656D_11381_c0_g1_i1	434	1656C;1656D	22	13	22	13	6.98406	4.2531	17.8992	23.7627	12.0357	0.506494	-0.981384	0.483474	1
1656D_11385_c0_g1_i1	343	1656C;1656D	9	2	9	2	4.20325	0.987785	5.78638	9.72111	1.85164	0.190476	-2.39232	0.223188	1
1656D_11387_c0_g1_i1	228	1656C;1656D	2	10	2	10	1.8119	9.59823	5.70922	2.16025	9.2582	4.28571	2.09954	0.295622	1
1656D_11389_c0_g1_i1	203	1656C;1656D	3	2	3	2	3.39168	2.37485	2.54601	3.24037	1.85164	0.571429	-0.807355	0.902082	1
1656D_11390_c0_g1_i1	218	1656C;1656D	3	6	3	6	2.96368	6.21563	4.39765	3.24037	5.55492	1.71429	0.777608	0.793982	1
1656D_11391_c0_g1_i1	222	1656C;1656D	2	9	2	9	1.90326	9.0812	5.24631	2.16025	8.33238	3.85714	1.94753	0.347706	1
1656D_11392_c0_g1_i1	204	1656C;1656D	5	1	5	1	5.60804	1.17723	3.16322	5.40062	0.92582	0.171429	-2.54432	0.332471	1
1656D_11394_c0_g1_i1	422	1656C;1656D	4	10	4	10	1.33704	3.43981	6.78935	4.32049	9.2582	2.14286	1.09954	0.571456	1
1656D_11396_c0_g1_i1	211	1656C	3	0	3	0	3.14156	0	1.62019	3.24037	0	0	-	0.316445	1
1656D_11396_c1_g1_i1	213	1656C	3	0	3	0	3.09854	0	1.62019	3.24037	0	0	-	0.316445	1
1656D_11397_c0_g1_i1	235	1656C;1656D	2	4	2	4	1.72073	3.65599	2.93176	2.16025	3.70328	1.71429	0.777608	0.88701	1
1656D_11398_c0_g1_i1	209	1656C;1656D	3	4	3	4	3.20118	4.51536	3.47183	3.24037	3.70328	1.14286	0.192645	1	1
1656D_113_c0_g1_i1	245	1656C;1656D	3	7	3	7	2.40599	5.96693	4.86056	3.24037	6.48074	2	1	0.677318	1
1656D_11401_c0_g1_i1	338	1656C;1656D	1	4	1	4	0.477651	2.02315	2.3917	1.08012	3.70328	3.42857	1.77761	0.612428	1
1656D_11406_c0_g1_i1	299	1656C;1656D	2	5	2	5	1.15148	3.06524	3.39467	2.16025	4.6291	2.14286	1.09954	0.721617	1
1656D_11406_c1_g1_i1	370	1656C	5	0	5	0	2.06741	0	2.70031	5.40062	0	0	-	0.138223	1
1656D_11408_c0_g1_i1	267	1656C;1656D	3	11	3	11	2.08211	8.09367	6.7122	3.24037	10.184	3.14286	1.65208	0.378153	1
1656D_1140_c0_g1_i1	213	1656C;1656D	3	3	3	3	3.09854	3.25873	3.00892	3.24037	2.77746	0.857143	-0.222392	1	1
1656D_11410_c0_g1_i1	269	1656C;1656D	2	6	2	6	1.3717	4.35961	3.85758	2.16025	5.55492	2.57143	1.36257	0.59295	1
1656D_11411_c0_g1_i1	206	1656C;1656D	52	34	52	34	56.9939	39.463	43.8222	56.1664	31.4779	0.56044	-0.835369	0.470135	1
1656D_11413_c0_g1_i1	267	1656C;1656D	3	6	3	6	2.08211	4.41473	4.39765	3.24037	5.55492	1.71429	0.777608	0.793982	1
1656D_11419_c0_g1_i1	350	1656C;1656D	4	5	4	5	1.80888	2.39265	4.4748	4.32049	4.6291	1.07143	0.0995357	1	1
1656D_11421_c0_g1_i1	206	1656C;1656D	6	1	6	1	6.57622	1.16068	3.70328	6.48074	0.92582	0.142857	-2.80735	0.251097	1
1656D_11422_c0_g1_i1	453	1656C	9	0	9	0	2.65573	0	4.86056	9.72111	0	0	-	0.0428041	0.945471
1656D_11424_c0_g1_i1	233	1656C;1656D	7	1	7	1	6.10704	0.930016	4.24334	7.56086	0.92582	0.122449	-3.02975	0.193965	1
1656D_11425_c0_g1_i2	245	1656C;1656D	3	10	3	10	2.40599	8.52419	6.24929	3.24037	9.2582	2.85714	1.51457	0.434072	1
1656D_11426_c0_g1_i1	347	1656C;1656D	3	7	3	7	1.377	3.39935	4.86056	3.24037	6.48074	2	1	0.677318	1
1656D_11427_c0_g1_i1	554	1656C;1656D	10	11	10	11	2.0516	2.27729	10.4926	10.8012	10.184	0.942857	-0.0848889	1	1
1656D_11428_c0_g1_i1	233	1656C;1656D	4	2	4	2	3.48973	1.86003	3.08607	4.32049	1.85164	0.428571	-1.22239	0.688967	1
1656D_1142_c0_g1_i1	597	1656C;1656D	7	9	7	9	1.25557	1.627	7.94662	7.56086	8.33238	1.10204	0.140178	1	1
1656D_11431_c0_g1_i1	319	1656C;1656D	2	7	2	7	1.04539	3.87884	4.32049	2.16025	6.48074	3	1.58496	0.492048	1
1656D_11431_c1_g1_i1	231	1656C;1656D	4	2	4	2	3.53346	1.8817	3.08607	4.32049	1.85164	0.428571	-1.22239	0.688967	1
1656D_11433_c0_g1_i1	453	1656C;1656D	38	35	38	35	11.2131	10.5602	36.7242	41.0447	32.4037	0.789474	-0.341037	0.789821	1
1656D_11434_c0_g1_i1	280	1656C	9	0	9	0	5.76801	0	4.86056	9.72111	0	0	-	0.0428041	0.945471
1656D_11437_c0_g1_i1	692	1656C;1656D	8	12	8	12	1.11169	1.68622	9.87541	8.64099	11.1098	1.28571	0.36257	0.879177	1
1656D_11438_c0_g1_i1	251	1656C	6	0	6	0	4.63548	0	3.24037	6.48074	0	0	-	0.0984225	1
1656D_1143_c0_g1_i1	347	1656C;1656D	6	13	6	13	2.754	6.31308	9.2582	6.48074	12.0357	1.85714	0.893085	0.613009	1
1656D_11446_c0_g1_i1	262	1656C;1656D	4	6	4	6	2.86838	4.56507	4.93771	4.32049	5.55492	1.28571	0.36257	0.968366	1
1656D_11447_c0_g1_i1	241	1656D	0	9	0	9	0	7.90803	4.16619	0	8.33238	-	-	0.0743623	1
1656D_11448_c0_g1_i1	351	1656C;1656D	5	6	5	6	2.25004	2.85567	5.47777	5.40062	5.55492	1.02857	0.040642	1	1
1656D_11449_c0_g1_i1	326	1656C;1656D	2	7	2	7	1.0089	3.75402	4.32049	2.16025	6.48074	3	1.58496	0.492048	1
1656D_1144_c0_g1_i1	215	1656D	0	6	0	6	0	6.40952	2.77746	0	5.55492	-	-	0.155871	1
1656D_1144_c1_g1_i1	324	1656C;1656D	3	9	3	9	1.53057	4.8658	5.78638	3.24037	8.33238	2.57143	1.36257	0.500783	1
1656D_11450_c0_g1_i1	392	1656C;1656D	1	4	1	4	0.377686	1.57561	2.3917	1.08012	3.70328	3.42857	1.77761	0.612428	1
1656D_11450_c1_g1_i1	369	1656C;1656D	3	3	3	3	1.24595	1.3118	3.00892	3.24037	2.77746	0.857143	-0.222392	1	1
1656D_11451_c0_g1_i1	204	1656C;1656D	1	3	1	3	1.12161	3.53169	1.92879	1.08012	2.77746	2.57143	1.36257	0.808713	1
1656D_11451_c1_g1_i1	241	1656C;1656D	6	1	6	1	4.94306	0.878671	3.70328	6.48074	0.92582	0.142857	-2.80735	0.251097	1
1656D_11452_c0_g1_i1	223	1656C;1656D	6	1	6	1	5.65214	1.00051	3.70328	6.48074	0.92582	0.142857	-2.80735	0.251097	1
1656D_11453_c0_g1_i1	263	1656D	0	8	0	8	0	6.04279	3.70328	0	7.40656	-	-	0.0931956	1
1656D_11454_c0_g1_i1	201	1656C;1656D	5	3	5	3	5.76844	3.63889	4.08904	5.40062	2.77746	0.514286	-0.959358	0.722412	1
1656D_11455_c0_g1_i1	274	1656C;1656D	1	6	1	6	0.665484	4.24117	3.31752	1.08012	5.55492	5.14286	2.36257	0.372187	1
1656D_11456_c0_g1_i1	422	1656C;1656D	4	8	4	8	1.33704	2.75185	5.86353	4.32049	7.40656	1.71429	0.777608	0.739051	1
1656D_11457_c0_g1_i1	444	1656C;1656D	11	6	11	6	3.36063	1.87949	8.71814	11.8814	5.55492	0.467532	-1.09686	0.524716	1
1656D_11458_c0_g1_i1	239	1656C;1656D	6	5	6	5	5.01849	4.4571	5.55492	6.48074	4.6291	0.714286	-0.485427	0.884459	1
1656D_11461_c0_g1_i1	314	1656D	0	7	0	7	0	3.982	3.24037	0	6.48074	-	-	0.119041	1
1656D_11463_c0_g1_i1	236	1656C;1656D	1	8	1	8	0.855531	7.28591	4.24334	1.08012	7.40656	6.85714	2.77761	0.242454	1
1656D_11464_c0_g1_i1	306	1656C;1656D	2	7	2	7	1.11354	4.13421	4.32049	2.16025	6.48074	3	1.58496	0.492048	1
1656D_11465_c0_g1_i1	313	1656C;1656D	3	2	3	2	1.61078	1.14165	2.54601	3.24037	1.85164	0.571429	-0.807355	0.902082	1
1656D_11465_c1_g1_i1	256	1656C;1656D	2	2	2	2	1.49147	1.58277	2.00594	2.16025	1.85164	0.857143	-0.222392	1	1
1656D_11467_c0_g1_i1	205	1656C;1656D	3	2	3	2	3.32823	2.33512	2.54601	3.24037	1.85164	0.571429	-0.807355	0.902082	1
1656D_11468_c0_g1_i1	298	1656C;1656D	4	6	4	6	2.31195	3.69691	4.93771	4.32049	5.55492	1.28571	0.36257	0.968366	1
1656D_11469_c0_g1_i1	835	1656C;1656D	1630	2693	1630	2693	167.889	281.645	2126.92	1760.6	2493.23	1.41613	0.50195	0.535548	1
1656D_11470_c0_g1_i1	314	1656C;1656D	4	12	4	12	2.13925	6.82629	7.71517	4.32049	11.1098	2.57143	1.36257	0.448008	1
1656D_11470_c1_g1_i1	270	1656C;1656D	4	1	4	1	2.72704	0.722305	2.62316	4.32049	0.92582	0.214286	-2.22239	0.452547	1
1656D_11471_c0_g1_i1	449	1656C;1656D	9.00181	8.24027	9	8	2.69843	2.52762	8.56384	9.72111	7.40656	0.761905	-0.392317	0.87572	1
1656D_11471_c0_g2_i2	600	1656C;1656D	368.998	281.76	369	282	65.6206	50.5009	329.823	398.566	261.081	0.655052	-0.610318	0.455055	1
1656D_11472_c0_g1_i1	240	1656C;1656D	2	8	2	8	1.65705	7.0783	4.7834	2.16025	7.40656	3.42857	1.77761	0.412	1
1656D_11474_c0_g1_i1	331	1656C;1656D	2	8	2	8	0.984714	4.18971	4.7834	2.16025	7.40656	3.42857	1.77761	0.412	1
1656D_11475_c0_g1_i1	317	1656C;1656D	9	13	9	13	4.7508	7.26958	10.8784	9.72111	12.0357	1.2381	0.308122	0.900225	1
1656D_11477_c0_g1_i1	368	1656C;1656D	4	7	4	7	1.66825	3.07318	5.40062	4.32049	6.48074	1.5	0.584963	0.844754	1
1656D_11478_c0_g1_i1	313	1656C;1656D	4	4	4	4	2.14771	2.2833	4.01189	4.32049	3.70328	0.857143	-0.222392	1	1
1656D_11479_c0_g1_i1	296	1656D	0	5	0	5	0	3.10687	2.31455	0	4.6291	-	-	0.210896	1
1656D_11480_c0_g1_i1	317	1656C;1656D	3	7	3	7	1.5836	3.91439	4.86056	3.24037	6.48074	2	1	0.677318	1
1656D_11482_c0_g1_i1	1140	1656C;1656D	71	39	71	39	4.69957	2.63508	56.3979	76.6888	36.107	0.470825	-1.08674	0.322759	1
1656D_11484_c0_g1_i1	244	1656C;1656D	3	4	3	4	2.4247	3.4343	3.47183	3.24037	3.70328	1.14286	0.192645	1	1
1656D_11485_c0_g1_i1	257	1656C;1656D	6	5	6	5	4.45314	3.9264	5.55492	6.48074	4.6291	0.714286	-0.485427	0.884459	1
1656D_11486_c0_g1_i1	282	1656C;1656D	5	2	5	2	3.15961	1.34801	3.62613	5.40062	1.85164	0.342857	-1.54432	0.534519	1
1656D_1148_c0_g1_i1	232	1656C;1656D	1	3	1	3	0.878346	2.80299	1.92879	1.08012	2.77746	2.57143	1.36257	0.808713	1
1656D_1148_c1_g1_i1	254	1656C;1656D	5	3	5	3	3.78411	2.40484	4.08904	5.40062	2.77746	0.514286	-0.959358	0.722412	1
1656D_11490_c0_g1_i1	202	1656C	8	0	8	0	9.13605	0	4.32049	8.64099	0	0	-	0.0552302	1
1656D_11491_c0_g1_i1	414	1656D	0	15	0	15	0	5.34206	6.94365	0	13.8873	-	-	0.0245032	0.767531
1656D_11493_c0_g1_i1	233	1656C;1656D	3	5	3	5	2.6173	4.65008	3.93474	3.24037	4.6291	1.42857	0.514573	0.935572	1
1656D_11495_c0_g1_i1	202	1656C;1656D	4	3	4	3	4.56803	3.59199	3.54898	4.32049	2.77746	0.642857	-0.63743	0.894145	1
1656D_11496_c0_g1_i1	235	1656C;1656D	4	2	4	2	3.44147	1.828	3.08607	4.32049	1.85164	0.428571	-1.22239	0.688967	1
1656D_11499_c0_g1_i1	311	1656C;1656D	3	3	3	3	1.63008	1.72593	3.00892	3.24037	2.77746	0.857143	-0.222392	1	1
1656D_1149_c0_g1_i1	372	1656C;1656D	6	8	6	8	2.46268	3.4481	6.94365	6.48074	7.40656	1.14286	0.192645	1	1
1656D_114_c0_g1_i1	385	1656C;1656D	5	4	5	4	1.94658	1.62619	4.55195	5.40062	3.70328	0.685714	-0.544321	0.888737	1
1656D_114_c1_g1_i1	238	1656C;1656D	3	2	3	2	2.5302	1.79541	2.54601	3.24037	1.85164	0.571429	-0.807355	0.902082	1
1656D_11502_c0_g1_i1	610	1656C	52	0	52	0	8.98375	0	28.0832	56.1664	0	0	-	0.000154212	0.0288733
1656D_11506_c0_g1_i1	236	1656C;1656D	6	2	6	2	5.13319	1.82148	4.16619	6.48074	1.85164	0.285714	-1.80735	0.421356	1
1656D_11507_c0_g1_i1	336	1656C;1656D	10	3	10	3	4.82199	1.53165	6.78935	10.8012	2.77746	0.257143	-1.95936	0.283228	1
1656D_11508_c0_g1_i1	415	1656C;1656D	14	22	14	22	4.81562	7.79879	17.7449	15.1217	20.368	1.34694	0.429684	0.78559	1
1656D_11510_c0_g1_i1	253	1656C	8	0	8	0	6.09098	0	4.32049	8.64099	0	0	-	0.0552302	1
1656D_11512_c0_g1_i1	240	1656C;1656D	10	1	10	1	8.28526	0.884787	5.86353	10.8012	0.92582	0.0857143	-3.54432	0.0984265	1
1656D_11514_c0_g1_i1	243	1656C;1656D	4	1	4	1	3.25431	0.866056	2.62316	4.32049	0.92582	0.214286	-2.22239	0.452547	1
1656D_11515_c0_g1_i1	206	1656C;1656D	2	5	2	5	2.19207	5.80338	3.39467	2.16025	4.6291	2.14286	1.09954	0.721617	1
1656D_11516_c0_g1_i1	202	1656D	0	3	0	3	0	3.59199	1.38873	0	2.77746	-	-	0.428162	1
1656D_11516_c1_g1_i1	215	1656D	0	4	0	4	0	4.27301	1.85164	0	3.70328	-	-	0.295121	1
1656D_11519_c0_g1_i1	622	1656C;1656D	11	2	11	2	1.83602	0.336309	6.8665	11.8814	1.85164	0.155844	-2.68182	0.154152	1
1656D_1151_c0_g1_i1	253	1656C;1656D	1	8	1	8	0.761372	6.46668	4.24334	1.08012	7.40656	6.85714	2.77761	0.242454	1
1656D_11522_c1_g1_i1	218	1656C;1656D	3	7	3	7	2.96368	7.25157	4.86056	3.24037	6.48074	2	1	0.677318	1
1656D_11525_c0_g1_i1	354	1656C;1656D	18	1	18	1	7.9855	0.468989	10.184	19.4422	0.92582	0.047619	-4.39232	0.0249422	0.777278
1656D_11526_c0_g1_i1	385	1656C;1656D	4	5	4	5	1.55726	2.03274	4.4748	4.32049	4.6291	1.07143	0.0995357	1	1
1656D_11527_c0_g1_i1	263	1656C;1656D	3	1	3	1	2.13605	0.755349	2.0831	3.24037	0.92582	0.285714	-1.80735	0.635182	1
1656D_11528_c0_g1_i1	337	1656C;1656D	5	1	5	1	2.39868	0.508086	3.16322	5.40062	0.92582	0.171429	-2.54432	0.332471	1
1656D_11529_c0_g1_i1	381	1656C;1656D	3	3	3	3	1.18709	1.24327	3.00892	3.24037	2.77746	0.857143	-0.222392	1	1
1656D_11531_c0_g1_i1	300	1656C;1656D	2	6	2	6	1.14403	3.66165	3.85758	2.16025	5.55492	2.57143	1.36257	0.59295	1
1656D_11531_c1_g1_i1	261	1656D	0	3	0	3	0	2.29254	1.38873	0	2.77746	-	-	0.428162	1
1656D_11532_c0_g1_i1	343	1656C;1656D	3	5	3	5	1.40108	2.46946	3.93474	3.24037	4.6291	1.42857	0.514573	0.935572	1
1656D_11532_c1_g1_i1	346	1656C;1656D	7	9	7	9	3.22365	4.38719	7.94662	7.56086	8.33238	1.10204	0.140178	1	1
1656D_11533_c0_g1_i1	235	1656C;1656D	12	6	12	6	10.3244	5.48399	9.2582	12.9615	5.55492	0.428571	-1.22239	0.464204	1
1656D_11537_c0_g1_i1	204	1656C;1656D	4	3	4	3	4.48643	3.53169	3.54898	4.32049	2.77746	0.642857	-0.63743	0.894145	1
1656D_11539_c0_g1_i1	204	1656C;1656D	2	1	2	1	2.24322	1.17723	1.54303	2.16025	0.92582	0.428571	-1.22239	0.915332	1
1656D_11539_c1_g1_i1	301	1656C;1656D	7	5	7	5	3.9839	3.03911	6.09498	7.56086	4.6291	0.612245	-0.707819	0.75953	1
1656D_1153_c0_g1_i1	299	1656C	15	0	15	0	8.63612	0	8.10093	16.2019	0	0	-	0.0123858	0.546446
1656D_11541_c0_g1_i1	338	1656C;1656D	4	6	4	6	1.91061	3.03473	4.93771	4.32049	5.55492	1.28571	0.36257	0.968366	1
1656D_11542_c0_g1_i1	295	1656C	11	0	11	0	6.45834	0	5.94068	11.8814	0	0	-	0.0269418	0.789742
1656D_11543_c0_g1_i1	244	1656C;1656D	4	3	4	3	3.23294	2.57572	3.54898	4.32049	2.77746	0.642857	-0.63743	0.894145	1
1656D_11545_c0_g1_i1	229	1656C;1656D	1	6	1	6	0.898942	5.72326	3.31752	1.08012	5.55492	5.14286	2.36257	0.372187	1
1656D_11546_c0_g1_i1	281	1656C;1656D	3	6	3	6	1.90911	4.06662	4.39765	3.24037	5.55492	1.71429	0.777608	0.793982	1
1656D_11546_c1_g1_i1	292	1656C;1656D	3	1	3	1	1.79069	0.63569	2.0831	3.24037	0.92582	0.285714	-1.80735	0.635182	1
1656D_11547_c0_g1_i1	253	1656C;1656D	7	4	7	4	5.32961	3.23334	5.63207	7.56086	3.70328	0.489796	-1.02975	0.626625	1
1656D_11548_c0_g1_i1	255	1656C;1656D	4	3	4	3	3.00527	2.39122	3.54898	4.32049	2.77746	0.642857	-0.63743	0.894145	1
1656D_11549_c0_g1_i1	283	1656D	0	3	0	3	0	2.01085	1.38873	0	2.77746	-	-	0.428162	1
1656D_11549_c1_g1_i1	205	1656D	0	1	0	1	0	1.16756	0.46291	0	0.92582	-	-	1	1
1656D_1154_c0_g1_i1	510	1656C	10	0	10	0	2.38549	0	5.40062	10.8012	0	0	-	0.0336981	0.861749
1656D_11550_c0_g1_i1	227	1656C;1656D	2	4	2	4	1.82664	3.86428	2.93176	2.16025	3.70328	1.71429	0.777608	0.88701	1
1656D_11556_c0_g1_i1	1761	1656C;1656D	37	63	37	63	1.41738	2.47338	49.1456	39.9646	58.3267	1.45946	0.545434	0.635633	1
1656D_11556_c1_g1_i1	237	1656C;1656D	2	5	2	5	1.69972	4.52033	3.39467	2.16025	4.6291	2.14286	1.09954	0.721617	1
1656D_11557_c0_g1_i1	505	1656C;1656D	10	13	10	13	2.4308	3.19456	11.4184	10.8012	12.0357	1.11429	0.156119	0.983809	1
1656D_11559_c0_g1_i1	427	1656C;1656D	9	22	9	22	2.94653	7.40933	15.0446	9.72111	20.368	2.09524	1.06711	0.468883	1
1656D_11560_c0_g1_i1	295	1656C;1656D	4	2	4	2	2.34849	1.2478	3.08607	4.32049	1.85164	0.428571	-1.22239	0.688967	1
1656D_11560_c1_g1_i1	201	1656C;1656D	1	1	1	1	1.15369	1.21296	1.00297	1.08012	0.92582	0.857143	-0.222392	1	1
1656D_11561_c0_g1_i1	280	1656C;1656D	5	5	5	5	3.20445	3.40533	5.01486	5.40062	4.6291	0.857143	-0.222392	1	1
1656D_11564_c0_g1_i1	256	1656D	0	10	0	10	0	7.91386	4.6291	0	9.2582	-	-	0.0602193	1
1656D_11565_c0_g1_i1	350	1656C;1656D	4	9	4	9	1.80888	4.30677	6.32644	4.32049	8.33238	1.92857	0.947533	0.648739	1
1656D_11566_c0_g1_i1	599	1656C;1656D	5	16	5	16	0.89162	2.87602	10.1069	5.40062	14.8131	2.74286	1.45568	0.373378	1
1656D_11567_c0_g1_i1	260	1656C;1656D	4	11	4	11	2.90617	8.46949	7.25226	4.32049	10.184	2.35714	1.23704	0.505132	1
1656D_11568_c0_g1_i1	202	1656C;1656D	2	4	2	4	2.28401	4.78932	2.93176	2.16025	3.70328	1.71429	0.777608	0.88701	1
1656D_1156_c0_g1_i1	608	1656C;1656D	92	14	92	14	15.9873	2.45064	56.1664	99.3714	12.9615	0.130435	-2.9386	0.0123746	0.546446
1656D_11570_c0_g1_i1	557	1656C;1656D	16	13	16	13	3.25014	2.664	14.6588	17.282	12.0357	0.696429	-0.521953	0.746746	1
1656D_11570_c1_g1_i1	260	1656C;1656D	3	1	3	1	2.17963	0.769954	2.0831	3.24037	0.92582	0.285714	-1.80735	0.635182	1
1656D_11571_c0_g1_i1	1175	1656C;1656D	3	46	3	46	0.190748	2.98668	22.914	3.24037	42.5877	13.1429	3.71621	0.0138882	0.588337
1656D_11572_c0_g1_i1	212	1656C;1656D	5	4	5	4	5.1926	4.39009	4.55195	5.40062	3.70328	0.685714	-0.544321	0.888737	1
1656D_11574_c0_g1_i1	330	1656C;1656D	5	7	5	7	2.47249	3.68177	5.94068	5.40062	6.48074	1.2	0.263034	0.9921	1
1656D_11575_c0_g1_i1	211	1656C;1656D	1	3	1	3	1.04719	3.32718	1.92879	1.08012	2.77746	2.57143	1.36257	0.808713	1
1656D_11575_c1_g1_i1	889	1656C;1656D	10	29	10	29	0.937821	2.76464	18.825	10.8012	26.8488	2.48571	1.31366	0.342343	1
1656D_11576_c0_g1_i1	756	1656C;1656D	6	30	6	30	0.721733	3.65431	17.1277	6.48074	27.7746	4.28571	2.09954	0.145497	1
1656D_11576_c1_g1_i1	262	1656D	0	4	0	4	0	3.04338	1.85164	0	3.70328	-	-	0.295121	1
1656D_11577_c0_g1_i1	299	1656C;1656D	1	6	1	6	0.575742	3.67829	3.31752	1.08012	5.55492	5.14286	2.36257	0.372187	1
1656D_11579_c0_g1_i1	210	1656C;1656D	4	2	4	2	4.23629	2.23738	3.08607	4.32049	1.85164	0.428571	-1.22239	0.688967	1
1656D_1157_c0_g1_i1	279	1656C;1656D	3	10	3	10	1.93268	6.83999	6.24929	3.24037	9.2582	2.85714	1.51457	0.434072	1
1656D_11580_c0_g1_i1	271	1656C;1656D	3	1	3	1	2.03316	0.72015	2.0831	3.24037	0.92582	0.285714	-1.80735	0.635182	1
1656D_11580_c1_g1_i1	303	1656C;1656D	4	1	4	1	2.25567	0.601492	2.62316	4.32049	0.92582	0.214286	-2.22239	0.452547	1
1656D_11582_c0_g1_i1	692	1656C;1656D	11	17	11	17	1.52858	2.38881	13.8101	11.8814	15.7389	1.32468	0.405639	0.821729	1
1656D_11584_c0_g1_i1	271	1656D	0	8	0	8	0	5.7612	3.70328	0	7.40656	-	-	0.0931956	1
1656D_11586_c0_g1_i1	272	1656C;1656D	2	3	2	3	1.34745	2.14852	2.46885	2.16025	2.77746	1.28571	0.36257	1	1
1656D_11587_c0_g1_i1	242	1656C;1656D	2	2	2	2	1.63838	1.74443	2.00594	2.16025	1.85164	0.857143	-0.222392	1	1
1656D_11587_c1_g1_i1	264	1656C;1656D	2	4	2	4	1.41284	2.99853	2.93176	2.16025	3.70328	1.71429	0.777608	0.88701	1
1656D_11588_c0_g1_i1	314	1656C;1656D	10	15	10	15	5.34812	8.53286	12.3443	10.8012	13.8873	1.28571	0.36257	0.857075	1
1656D_11589_c0_g1_i1	205	1656C;1656D	2	7	2	7	2.21882	8.17292	4.32049	2.16025	6.48074	3	1.58496	0.492048	1
1656D_11590_c0_g1_i1	226	1656C;1656D	3	4	3	4	2.75621	3.89594	3.47183	3.24037	3.70328	1.14286	0.192645	1	1
1656D_11591_c0_g1_i1	814	1656C;1656D	85	23	85	23	9.10366	2.49951	56.5522	91.8105	21.2939	0.231933	-2.10822	0.0613744	1
1656D_11592_c0_g1_i1	334	1656C;1656D	7	3	7	3	3.40225	1.54709	5.16916	7.56086	2.77746	0.367347	-1.44478	0.484262	1
1656D_11593_c0_g1_i1	352	1656C;1656D	10	4	10	4	4.47883	1.89282	7.25226	10.8012	3.70328	0.342857	-1.54432	0.387358	1
1656D_11596_c0_g1_i1	271	1656C;1656D	6	2	6	2	4.06632	1.4403	4.16619	6.48074	1.85164	0.285714	-1.80735	0.421356	1
1656D_11597_c0_g1_i1	621	1656C;1656D	9	12	9	12	1.50635	2.0237	10.4155	9.72111	11.1098	1.14286	0.192645	0.970234	1
1656D_11597_c1_g1_i1	256	1656C;1656D	4	3	4	3	2.98294	2.37416	3.54898	4.32049	2.77746	0.642857	-0.63743	0.894145	1
1656D_11599_c0_g1_i1	839	1656D	0	36	0	36	0	3.73815	16.6648	0	33.3295	-	-	0.00194067	0.171137
1656D_11599_c1_g1_i1	496	1656D	0	23	0	23	0	5.84293	10.6469	0	21.2939	-	-	0.00806828	0.42716
1656D_11600_c0_g1_i1	302	1656C	11	0	11	0	6.23432	0	5.94068	11.8814	0	0	-	0.0269418	0.789742
1656D_11601_c0_g1_i1	222	1656C;1656D	4	3	4	3	3.80652	3.02707	3.54898	4.32049	2.77746	0.642857	-0.63743	0.894145	1
1656D_11602_c0_g1_i1	439	1656C;1656D	10	2	10	2	3.11546	0.639938	6.32644	10.8012	1.85164	0.171429	-2.54432	0.184621	1
1656D_11603_c0_g1_i1	260	1656C;1656D	8	4.52751	8	5	5.81234	3.48597	6.63504	8.64099	4.6291	0.535714	-0.900464	0.654634	1
1656D_11604_c0_g1_i1	236	1656C;1656D	5	3	5	3	4.27766	2.73222	4.08904	5.40062	2.77746	0.514286	-0.959358	0.722412	1
1656D_11607_c0_g1_i1	244	1656C;1656D	3	6	3	6	2.4247	5.15144	4.39765	3.24037	5.55492	1.71429	0.777608	0.793982	1
1656D_11609_c0_g1_i1	852	1656C;1656D	915	726	915	726	91.4194	73.6771	830.229	988.313	672.145	0.680094	-0.556195	0.4767	1
1656D_11609_c1_g1_i1	338	1656C;1656D	4	3	4	3	1.91061	1.51737	3.54898	4.32049	2.77746	0.642857	-0.63743	0.894145	1
1656D_1160_c0_g1_i1	203	1656C	7	0	7	0	7.91392	0	3.78043	7.56086	0	0	-	0.0727312	1
1656D_11612_c0_g1_i1	231	1656C	5	0	5	0	4.41683	0	2.70031	5.40062	0	0	-	0.138223	1
1656D_11614_c0_g1_i1	292	1656C;1656D	2	5	2	5	1.19379	3.17845	3.39467	2.16025	4.6291	2.14286	1.09954	0.721617	1
1656D_11615_c0_g1_i1	236	1656C;1656D	5	5	5	5	4.27766	4.55369	5.01486	5.40062	4.6291	0.857143	-0.222392	1	1
1656D_11616_c0_g1_i1	504	1656D	0	20	0	20	0	4.93248	9.2582	0	18.5164	-	-	0.0118799	0.541803
1656D_11616_c1_g1_i1	215	1656D	0	1	0	1	0	1.06825	0.46291	0	0.92582	-	-	1	1
1656D_11617_c0_g1_i1	1844	1656C;1656D	57	87	57	87	2.06714	3.23451	71.0567	61.567	80.5463	1.30827	0.387661	0.718841	1
1656D_1161_c0_g1_i1	1917	1656C;1656D	1672	508	1672	508	57.9209	18.045	1138.14	1805.97	470.317	0.260424	-1.94107	0.0162957	0.63491
1656D_11620_c0_g1_i1	372	1656C;1656D	4	7	4	7	1.64179	3.01709	5.40062	4.32049	6.48074	1.5	0.584963	0.844754	1
1656D_11621_c0_g1_i1	221	1656C;1656D	3	5	3	5	2.88521	5.08103	3.93474	3.24037	4.6291	1.42857	0.514573	0.935572	1
1656D_11622_c0_g1_i1	283	1656C;1656D	7	4	7	4	4.40028	2.68114	5.63207	7.56086	3.70328	0.489796	-1.02975	0.626625	1
1656D_11623_c0_g1_i1	328	1656D	0	6.51831	0	7	0	3.4647	3.24037	0	6.48074	-	-	0.119041	1
1656D_11623_c0_g2_i1	443	1656C;1656D	3	8.48169	3	8	0.919764	2.66981	5.32347	3.24037	7.40656	2.28571	1.19265	0.580843	1
1656D_11624_c0_g1_i1	995	1656C;1656D	50	79	50	79	3.98722	6.41823	63.573	54.0062	73.1398	1.35429	0.437532	0.690353	1
1656D_11628_c0_g1_i1	222	1656C;1656D	1	7	1	7	0.951629	7.06316	3.78043	1.08012	6.48074	6	2.58496	0.298202	1
1656D_11629_c0_g1_i1	218	1656C;1656D	1	1	1	1	0.987895	1.03594	1.00297	1.08012	0.92582	0.857143	-0.222392	1	1
1656D_11629_c1_g1_i1	333	1656C	3	0	3	0	1.46547	0	1.62019	3.24037	0	0	-	0.316445	1
1656D_11631_c0_g1_i1	503	1656C;1656D	4	13	4	13	0.979733	3.21709	8.17808	4.32049	12.0357	2.78571	1.47805	0.398613	1
1656D_11633_c0_g1_i1	2459	1656C;1656D	49	94	49	94	1.27389	2.50899	69.9766	52.926	87.0271	1.64431	0.717487	0.497801	1
1656D_11634_c0_g1_i1	342	1656C;1656D	7	9	7	9	3.28787	4.46712	7.94662	7.56086	8.33238	1.10204	0.140178	1	1
1656D_11635_c0_g1_i1	1166	1656C;1656D	364	509	364	509	23.381	33.3835	432.204	393.165	471.242	1.19859	0.261335	0.745101	1
1656D_11636_c0_g1_i1	259	1656C;1656D	1	8	1	8	0.730879	6.19869	4.24334	1.08012	7.40656	6.85714	2.77761	0.242454	1
1656D_11637_c0_g1_i1	899	1656C;1656D	32	28	32	28	2.952	2.62629	30.2435	34.564	25.923	0.75	-0.415037	0.752917	1
1656D_11638_c0_g1_i1	228	1656C;1656D	7	2	7	2	6.34166	1.91965	4.70625	7.56086	1.85164	0.244898	-2.02975	0.336922	1
1656D_11639_c0_g1_i1	256	1656C;1656D	3	5	3	5	2.2372	3.95693	3.93474	3.24037	4.6291	1.42857	0.514573	0.935572	1
1656D_1163_c0_g1_i1	747	1656C;1656D	2	119	2	119	0.24528	14.7723	56.1664	2.16025	110.173	51	5.67243	0.000109864	0.0221883
1656D_11640_c0_g1_i1	234	1656C;1656D	5	2	5	2	4.32955	1.84386	3.62613	5.40062	1.85164	0.342857	-1.54432	0.534519	1
1656D_11642_c0_g1_i1	214	1656C;1656D	9	4	9	4	9.20197	4.3074	6.7122	9.72111	3.70328	0.380952	-1.39232	0.45209	1
1656D_11647_c0_g1_i1	255	1656C;1656D	2	6	2	6	1.50264	4.78245	3.85758	2.16025	5.55492	2.57143	1.36257	0.59295	1
1656D_1164_c0_g1_i1	214	1656C;1656D	2	4	2	4	2.04488	4.3074	2.93176	2.16025	3.70328	1.71429	0.777608	0.88701	1
1656D_11650_c0_g1_i1	832	1656C;1656D	38	6	38	6	3.93552	0.630842	23.2998	41.0447	5.55492	0.135338	-2.88536	0.0379301	0.933482
1656D_11651_c0_g1_i1	384	1656C;1656D	10	5	10	5	3.90533	2.04384	7.71517	10.8012	4.6291	0.428571	-1.22239	0.492244	1
1656D_11652_c0_g1_i1	523	1656C;1656D	43	34	43	34	9.79891	7.82914	38.9616	46.4453	31.4779	0.677741	-0.561194	0.641363	1
1656D_11653_c0_g1_i1	222	1656C;1656D	4	1	4	1	3.80652	1.00902	2.62316	4.32049	0.92582	0.214286	-2.22239	0.452547	1
1656D_11655_c0_g1_i1	476	1656C;1656D	6	9	6	9	1.62497	2.4724	7.40656	6.48074	8.33238	1.28571	0.36257	0.911785	1
1656D_11656_c0_g1_i1	2180	1656C;1656D	1565	2337	1565	2337	46.6827	71.5311	1927.02	1690.39	2163.64	1.27996	0.356103	0.657733	1
1656D_11658_c0_g1_i1	1361	1656C;1656D	57	26	57	26	2.99665	1.39801	42.8192	61.567	24.0713	0.390977	-1.35484	0.242852	1
1656D_11659_c0_g2_i1	1660	1656C;1656D	210	356	210	356	8.6363	14.9985	278.209	226.826	329.592	1.45306	0.539095	0.517211	1
1656D_1165_c0_g1_i1	608	1656C;1656D	14	39	14	39	2.43285	6.82678	25.6144	15.1217	36.107	2.38776	1.25565	0.330481	1
1656D_11660_c0_g2_i1	1864	1656C;1656D	105	120	105	120	3.75961	4.4051	112.256	113.413	111.098	0.979592	-0.0297473	0.985578	1
1656D_11661_c0_g1_i1	471	1656C;1656D	10	9	10	9	2.76307	2.52191	9.56681	10.8012	8.33238	0.771429	-0.374396	0.873509	1
1656D_11663_c0_g1_i1	249	1656C;1656D	3	5	3	5	2.34916	4.14878	3.93474	3.24037	4.6291	1.42857	0.514573	0.935572	1
1656D_11664_c0_g1_i1	337	1656C;1656D	5	5	5	5	2.39868	2.54043	5.01486	5.40062	4.6291	0.857143	-0.222392	1	1
1656D_11666_c0_g1_i1	421	1656C;1656D	11	5	11	5	3.69231	1.72722	8.25523	11.8814	4.6291	0.38961	-1.3599	0.429424	1
1656D_11668_c0_g1_i1	522	1656C;1656D	10	16	10	16	2.28639	3.69628	12.8072	10.8012	14.8131	1.37143	0.455679	0.80021	1
1656D_11669_c0_g1_i1	501	1656C;1656D	10	3	10	3	2.46764	0.747607	6.78935	10.8012	2.77746	0.257143	-1.95936	0.283228	1
1656D_1166_c0_g1_i1	334	1656C;1656D	3	6.00172	3	6	1.45811	3.09508	4.39765	3.24037	5.55492	1.71429	0.777608	0.793982	1
1656D_11670_c0_g1_i1	1090	1656C;1656D	47	51	47	51	3.30466	3.65824	48.9913	50.7658	47.2168	0.930091	-0.104556	0.94465	1
1656D_11671_c0_g1_i1	322	1656C;1656D	2	5	2	5	1.03019	2.72692	3.39467	2.16025	4.6291	2.14286	1.09954	0.721617	1
1656D_11671_c1_g1_i1	236	1656C	2	0	2	0	1.71106	0	1.08012	2.16025	0	0	-	0.522231	1
1656D_11672_c0_g1_i1	315	1656D	0	8	0	8	0	4.52478	3.70328	0	7.40656	-	-	0.0931956	1
1656D_11672_c1_g1_i1	394	1656D	0	12	0	12	0	4.68664	5.55492	0	11.1098	-	-	0.0408295	0.945471
1656D_11674_c0_g1_i1	850	1656C;1656D	1810	1359	1810	1359	181.483	138.399	1606.61	1955.02	1258.19	0.643567	-0.635837	0.424146	1
1656D_11674_c1_g1_i1	640	1656C;1656D	58	60	58	60	9.20886	9.60369	59.0982	62.6472	55.5492	0.8867	-0.173483	0.887027	1
1656D_11675_c0_g1_i1	2408	1656C;1656D	250	286	250	286	6.65573	7.81657	267.408	270.031	264.785	0.980571	-0.0283054	0.977767	1
1656D_11676_c0_g1_i1	326	1656C;1656D	10	3	10	3	5.04452	1.60887	6.78935	10.8012	2.77746	0.257143	-1.95936	0.283228	1
1656D_11677_c0_g1_i1	681	1656C;1656D	10	10	10	10	1.42769	1.4428	10.0297	10.8012	9.2582	0.857143	-0.222392	0.954916	1
1656D_11678_c0_g1_i1	324	1656C;1656D	8	3	8	3	4.08151	1.62193	5.70922	8.64099	2.77746	0.321429	-1.63743	0.40164	1
1656D_11679_c1_g1_i1	207	1656C;1656D	1	1	1	1	1.08587	1.14886	1.00297	1.08012	0.92582	0.857143	-0.222392	1	1
1656D_1167_c0_g1_i1	325	1656C;1656D	7	3	7	3	3.55029	1.61573	5.16916	7.56086	2.77746	0.367347	-1.44478	0.484262	1
1656D_11680_c0_g1_i1	533	1656C;1656D	18	4	18	4	3.9584	0.888856	11.5728	19.4422	3.70328	0.190476	-2.39232	0.131872	1
1656D_11681_c0_g1_i1	323	1656C;1656D	1	10	1	10	0.51267	5.42723	5.16916	1.08012	9.2582	8.57143	3.09954	0.165873	1
1656D_11682_c0_g1_i1	221	1656C;1656D	8	2	8	2	7.6939	2.03241	5.24631	8.64099	1.85164	0.214286	-2.22239	0.2727	1
1656D_11684_c0_g1_i1	860	1656C;1656D	19	20	19	20	1.87202	2.00175	19.5194	20.5223	18.5164	0.902256	-0.148392	0.9524	1
1656D_11685_c0_g1_i1	768	1656C;1656D	61	51	61	51	7.15615	6.06131	56.5522	65.8875	47.2168	0.716628	-0.480704	0.667635	1
1656D_11686_c0_g1_i1	293	1656C;1656D	5	8	5	8	2.96872	5.05396	6.40359	5.40062	7.40656	1.37143	0.455679	0.882513	1
1656D_11687_c0_g1_i1	221	1656C;1656D	1	3	1	3	0.961738	3.04862	1.92879	1.08012	2.77746	2.57143	1.36257	0.808713	1
1656D_11688_c0_g1_i1	508	1656C;1656D	4	14	4	14	0.961621	3.40215	8.64099	4.32049	12.9615	3	1.58496	0.355727	1
1656D_1168_c0_g1_i1	344	1656C;1656D	5	7	5	7	2.3223	3.44305	5.94068	5.40062	6.48074	1.2	0.263034	0.9921	1
1656D_11690_c0_g1_i1	221	1656C;1656D	8	6	8	6	7.6939	6.09724	7.09795	8.64099	5.55492	0.642857	-0.63743	0.770856	1
1656D_11691_c0_g1_i1	309	1656C;1656D	2	7	2	7	1.09809	4.06867	4.32049	2.16025	6.48074	3	1.58496	0.492048	1
1656D_11694_c0_g1_i1	204	1656C;1656D	1	6	1	6	1.12161	7.06339	3.31752	1.08012	5.55492	5.14286	2.36257	0.372187	1
1656D_11695_c0_g1_i1	250	1656C;1656D	4	2	4	2	3.11364	1.64833	3.08607	4.32049	1.85164	0.428571	-1.22239	0.688967	1
1656D_11696_c0_g1_i1	231	1656C	5	0	5	0	4.41683	0	2.70031	5.40062	0	0	-	0.138223	1
1656D_11697_c0_g1_i1	580	1656D	0	26	0	26	0	4.94993	12.0357	0	24.0713	-	-	0.00560901	0.342657
1656D_11698_c0_g1_i1	1205	1656C;1656D	15	66	15	66	0.922578	4.14645	38.653	16.2019	61.1041	3.77143	1.91511	0.112715	1
1656D_11699_c0_g1_i1	387	1656C;1656D	11	4	11	4	4.25012	1.61066	7.79232	11.8814	3.70328	0.311688	-1.68182	0.333675	1
1656D_1169_c0_g1_i1	378	1656C;1656D	20	6	20	6	8.01525	2.51752	13.5787	21.6025	5.55492	0.257143	-1.95936	0.189942	1
1656D_1169_c1_g1_i1	217	1656C;1656D	2	2	2	2	1.98981	2.08979	2.00594	2.16025	1.85164	0.857143	-0.222392	1	1
1656D_116_c0_g1_i1	357	1656C;1656D	1	9	1	9	0.438177	4.15971	4.70625	1.08012	8.33238	7.71429	2.94753	0.199538	1
1656D_11700_c0_g1_i1	507	1656C;1656D	5	17	5	17	1.20679	4.14508	10.5698	5.40062	15.7389	2.91429	1.54314	0.338488	1
1656D_11701_c0_g1_i1	228	1656C;1656D	3	6	3	6	2.71785	5.75894	4.39765	3.24037	5.55492	1.71429	0.777608	0.793982	1
1656D_11703_c0_g1_i1	235	1656C;1656D	1	3	1	3	0.860367	2.74199	1.92879	1.08012	2.77746	2.57143	1.36257	0.808713	1
1656D_11704_c0_g1_i1	230	1656C;1656D	3	9	3	9	2.67324	8.53841	5.78638	3.24037	8.33238	2.57143	1.36257	0.500783	1
1656D_11705_c0_g1_i1	315	1656D	0	10	0	10	0	5.65598	4.6291	0	9.2582	-	-	0.0602193	1
1656D_11705_c1_g1_i1	205	1656C;1656D	1	2	1	2	1.10941	2.33512	1.46588	1.08012	1.85164	1.71429	0.777608	1	1
1656D_11706_c0_g1_i1	1058	1656C;1656D	636	876	636	876	46.574	65.4159	748.988	686.959	811.018	1.18059	0.239512	0.760157	1
1656D_11706_c1_g1_i1	687	1656C;1656D	33	33	33	33	4.64145	4.69283	33.0981	35.6441	30.5521	0.857143	-0.222392	0.87631	1
1656D_11708_c0_g1_i1	304	1656C;1656D	4	6	4	6	2.24633	3.58823	4.93771	4.32049	5.55492	1.28571	0.36257	0.968366	1
1656D_1170_c0_g1_i1	220	1656C;1656D	3	4	3	4	2.91369	4.08783	3.47183	3.24037	3.70328	1.14286	0.192645	1	1
1656D_11713_c0_g1_i1	948	1656C;1656D	378	415	378	415	32.2862	36.0762	396.251	408.287	384.215	0.941043	-0.0876673	0.915944	1
1656D_11714_c0_g1_i1	201	1656C;1656D	3	6	3	6	3.46106	7.27779	4.39765	3.24037	5.55492	1.71429	0.777608	0.793982	1
1656D_11715_c0_g1_i1	695	1656C;1656D	345	266	345	266	47.5951	37.1091	309.455	372.643	246.268	0.66087	-0.597563	0.467268	1
1656D_11716_c0_g1_i1	290	1656C;1656D	2	4	2	4	1.20637	2.56951	2.93176	2.16025	3.70328	1.71429	0.777608	0.88701	1
1656D_11717_c0_g1_i1	290	1656C;1656D	2	2	2	2	1.20637	1.28476	2.00594	2.16025	1.85164	0.857143	-0.222392	1	1
1656D_11717_c1_g1_i1	239	1656C;1656D	2	1	2	1	1.67283	0.891419	1.54303	2.16025	0.92582	0.428571	-1.22239	0.915332	1
1656D_11719_c0_g1_i1	250	1656C;1656D	5	5	5	5	3.89205	4.12083	5.01486	5.40062	4.6291	0.857143	-0.222392	1	1
1656D_11719_c1_g1_i1	235	1656C;1656D	2	3	2	3	1.72073	2.74199	2.46885	2.16025	2.77746	1.28571	0.36257	1	1
1656D_11721_c0_g1_i1	747	1656D	0	14.8479	0	15	0	1.84317	6.94365	0	13.8873	-	-	0.0245032	0.767531
1656D_11721_c0_g2_i1	1786	1656C;1656D	168	309.152	168	309	6.32835	11.936	233.77	181.461	286.078	1.57653	0.656753	0.439882	1
1656D_11723_c0_g1_i1	257	1656C;1656D	7	1	7	1	5.19533	0.785281	4.24334	7.56086	0.92582	0.122449	-3.02975	0.193965	1
1656D_11724_c0_g1_i1	216	1656C;1656D	1	7	1	7	1.00321	7.40284	3.78043	1.08012	6.48074	6	2.58496	0.298202	1
1656D_11725_c0_g1_i1	368	1656C;1656D	4	21	4	21	1.66825	9.21955	11.8814	4.32049	19.4422	4.5	2.16993	0.17156	1
1656D_11726_c0_g1_i1	1108	1656C;1656D	433	544	433	544	29.7777	38.1743	485.67	467.693	503.646	1.07687	0.106847	0.895203	1
1656D_11727_c0_g1_i1	206	1656C;1656D	4	2	4	2	4.38415	2.32135	3.08607	4.32049	1.85164	0.428571	-1.22239	0.688967	1
1656D_11728_c0_g1_i1	458	1656C;1656D	22	10	22	10	6.37481	2.95525	16.5105	23.7627	9.2582	0.38961	-1.3599	0.335748	1
1656D_1172_c0_g1_i1	2169	1656C;1656D	89	24	89	24	2.67031	0.738869	59.1753	96.131	22.2197	0.23114	-2.11316	0.0586172	1
1656D_11732_c0_g1_i1	300	1656C;1656D	5	4	5	4	2.86007	2.4411	4.55195	5.40062	3.70328	0.685714	-0.544321	0.888737	1
1656D_11733_c1_g1_i1	477	1656C;1656D	43	53	43	53	11.5987	14.4989	47.7569	46.4453	49.0685	1.05648	0.0792633	0.964375	1
1656D_11734_c0_g1_i1	213	1656C;1656D	2	1	2	1	2.06569	1.08624	1.54303	2.16025	0.92582	0.428571	-1.22239	0.915332	1
1656D_11734_c1_g1_i1	297	1656D	0	2	0	2	0	1.23543	0.92582	0	1.85164	-	-	0.653038	1
1656D_11735_c0_g1_i1	1077	1656C;1656D	74	6	74	6	5.28868	0.43739	42.742	79.9291	5.55492	0.0694981	-3.84688	0.00341644	0.254136
1656D_11736_c0_g1_i1	253	1656C;1656D	2	7	2	7	1.52274	5.65834	4.32049	2.16025	6.48074	3	1.58496	0.492048	1
1656D_11737_c0_g1_i1	220	1656D	0	10	0	10	0	10.2196	4.6291	0	9.2582	-	-	0.0602193	1
1656D_11739_c0_g1_i1	1543	1656C;1656D	276	376	276	376	12.4078	17.3071	323.111	298.114	348.108	1.1677	0.223672	0.786884	1
1656D_11740_c0_g2_i1	229	1656C;1656D	2	2	2	2	1.79788	1.90775	2.00594	2.16025	1.85164	0.857143	-0.222392	1	1
1656D_11741_c0_g1_i1	202	1656C;1656D	2	1	2	1	2.28401	1.19733	1.54303	2.16025	0.92582	0.428571	-1.22239	0.915332	1
1656D_11741_c1_g1_i1	244	1656C	3	0	3	0	2.4247	0	1.62019	3.24037	0	0	-	0.316445	1
1656D_11742_c0_g1_i1	696	1656C;1656D	23.503	35.2621	24	35	3.23483	4.90757	29.1633	25.923	32.4037	1.25	0.321928	0.817222	1
1656D_11742_c0_g2_i1	529	1656C;1656D	14.497	16.7379	14	17	3.23276	3.77438	15.4303	15.1217	15.7389	1.04082	0.0577155	1	1
1656D_11743_c0_g1_i1	246	1656C;1656D	3	5	3	5	2.38928	4.22493	3.93474	3.24037	4.6291	1.42857	0.514573	0.935572	1
1656D_11743_c1_g1_i1	218	1656C	2	0	2	0	1.97579	0	1.08012	2.16025	0	0	-	0.522231	1
1656D_11744_c0_g1_i1	292	1656D	0	6	0	6	0	3.81414	2.77746	0	5.55492	-	-	0.155871	1
1656D_11744_c1_g1_i1	315	1656C;1656D	3	3	3	3	1.59839	1.69679	3.00892	3.24037	2.77746	0.857143	-0.222392	1	1
1656D_11746_c0_g1_i1	267	1656C;1656D	6	2	6	2	4.16421	1.47158	4.16619	6.48074	1.85164	0.285714	-1.80735	0.421356	1
1656D_11747_c0_g1_i1	1889	1656C;1656D	52	88	52	88	1.83285	3.18026	68.8193	56.1664	81.4722	1.45055	0.536599	0.615957	1
1656D_1174_c0_g1_i1	217	1656C;1656D	4	3	4	3	3.97961	3.13468	3.54898	4.32049	2.77746	0.642857	-0.63743	0.894145	1
1656D_11751_c0_g1_i1	986	1656C	83	0	83	0	6.70398	0	44.8251	89.6502	0	0	-	1.47872e-05	0.00489521
1656D_11752_c0_g1_i1	270	1656D	0	13	0	13	0	9.38996	6.01783	0	12.0357	-	-	0.0341426	0.861749
1656D_11753_c0_g1_i1	424	1656C;1656D	7	4	7	4	2.32043	1.36544	5.63207	7.56086	3.70328	0.489796	-1.02975	0.626625	1
1656D_11753_c1_g1_i1	218	1656C;1656D	2	1	2	1	1.97579	1.03594	1.54303	2.16025	0.92582	0.428571	-1.22239	0.915332	1
1656D_11756_c0_g1_i1	267	1656C;1656D	5	5	5	5	3.47018	3.67894	5.01486	5.40062	4.6291	0.857143	-0.222392	1	1
1656D_11758_c0_g1_i1	214	1656C;1656D	2	1	2	1	2.04488	1.07685	1.54303	2.16025	0.92582	0.428571	-1.22239	0.915332	1
1656D_11758_c1_g1_i1	215	1656C	2	0	2	0	2.0239	0	1.08012	2.16025	0	0	-	0.522231	1
1656D_11760_c0_g1_i1	214	1656C;1656D	3	1	3	1	3.06732	1.07685	2.0831	3.24037	0.92582	0.285714	-1.80735	0.635182	1
1656D_11764_c0_g1_i1	1293	1656C;1656D	644	1105	644	1105	36.1451	63.3988	859.315	695.6	1023.03	1.47072	0.556521	0.476637	1
1656D_11765_c0_g1_i1	329	1656C;1656D	2	5	2	5	0.994537	2.64044	3.39467	2.16025	4.6291	2.14286	1.09954	0.721617	1
1656D_11766_c0_g1_i1	255	1656C;1656D	4	3	4	3	3.00527	2.39122	3.54898	4.32049	2.77746	0.642857	-0.63743	0.894145	1
1656D_11766_c1_g1_i1	241	1656C;1656D	4	3	4	3	3.29537	2.63601	3.54898	4.32049	2.77746	0.642857	-0.63743	0.894145	1
1656D_11768_c0_g1_i1	235	1656C;1656D	3	7	3	7	2.5811	6.39798	4.86056	3.24037	6.48074	2	1	0.677318	1
1656D_11769_c0_g1_i1	217	1656C;1656D	2	3	2	3	1.98981	3.13468	2.46885	2.16025	2.77746	1.28571	0.36257	1	1
1656D_1176_c0_g1_i1	387	1656C;1656D	1	10.6567	1	11	0.386375	4.29107	5.63207	1.08012	10.184	9.42857	3.23704	0.139126	1
1656D_11771_c0_g1_i1	255	1656C	9	0	9	0	6.76187	0	4.86056	9.72111	0	0	-	0.0428041	0.945471
1656D_11772_c0_g1_i1	730	1656C;1656D	14	18	14	18	1.78132	2.31806	15.8932	15.1217	16.6648	1.10204	0.140178	0.97036	1
1656D_11774_c0_g1_i1	634	1656C;1656D	15	9	15	9	2.42173	1.46369	12.2671	16.2019	8.33238	0.514286	-0.959358	0.538716	1
1656D_11775_c0_g1_i1	1650	1656C;1656D	1032	922	1032	922	42.7526	39.1277	984.147	1114.69	853.606	0.765781	-0.384997	0.622349	1
1656D_11776_c0_g1_i1	275	1656C	7	0	7	0	4.6269	0	3.78043	7.56086	0	0	-	0.0727312	1
1656D_11778_c0_g1_i1	307	1656C;1656D	5	5	5	5	2.77148	2.93363	5.01486	5.40062	4.6291	0.857143	-0.222392	1	1
1656D_1177_c0_g1_i1	432	1656C;1656D	9	5	9	5	2.882	1.64894	7.17511	9.72111	4.6291	0.47619	-1.07039	0.566502	1
1656D_11783_c0_g1_i1	292	1656C;1656D	8	5	8	5	4.77516	3.17845	6.63504	8.64099	4.6291	0.535714	-0.900464	0.654634	1
1656D_11784_c0_g1_i1	276	1656C;1656D	4	2	4	2	2.62981	1.39481	3.08607	4.32049	1.85164	0.428571	-1.22239	0.688967	1
1656D_11785_c0_g1_i1	223	1656D	0	7	0	7	0	7.00355	3.24037	0	6.48074	-	-	0.119041	1
1656D_11787_c0_g2_i1	264	1656C;1656D	4	5	4	5	2.82568	3.74817	4.4748	4.32049	4.6291	1.07143	0.0995357	1	1
1656D_11788_c1_g1_i1	282	1656C;1656D	26	12	26	12	16.43	8.08808	19.5965	28.0832	11.1098	0.395604	-1.33787	0.324503	1
1656D_1178_c0_g1_i1	355	1656C;1656D	2	6	2	6	0.883647	2.80092	3.85758	2.16025	5.55492	2.57143	1.36257	0.59295	1
1656D_1178_c1_g1_i1	233	1656C;1656D	1	3	1	3	0.872434	2.79005	1.92879	1.08012	2.77746	2.57143	1.36257	0.808713	1
1656D_11790_c0_g1_i1	239	1656C;1656D	6	16	6	16	5.01849	14.2627	10.6469	6.48074	14.8131	2.28571	1.19265	0.462512	1
1656D_11791_c0_g1_i1	201	1656D	0	3	0	3	0	3.63889	1.38873	0	2.77746	-	-	0.428162	1
1656D_11791_c1_g1_i1	225	1656C;1656D	2	3	2	3	1.8531	2.94856	2.46885	2.16025	2.77746	1.28571	0.36257	1	1
1656D_11792_c0_g1_i1	367	1656C;1656D	8	3	8	3	3.34923	1.32157	5.70922	8.64099	2.77746	0.321429	-1.63743	0.40164	1
1656D_11795_c0_g1_i1	358	1656C;1656D	4	27	4	27	1.7454	12.4208	14.6588	4.32049	24.9971	5.78571	2.5325	0.0987602	1
1656D_11795_c1_g1_i1	285	1656C	3	0	3	0	1.86592	0	1.62019	3.24037	0	0	-	0.316445	1
1656D_11797_c0_g1_i1	439	1656C;1656D	11	3	11	3	3.427	0.959907	7.32941	11.8814	2.77746	0.233766	-2.09686	0.240473	1
1656D_11798_c0_g1_i1	217	1656C;1656D	4	2	4	2	3.97961	2.08979	3.08607	4.32049	1.85164	0.428571	-1.22239	0.688967	1
1656D_11799_c0_g1_i1	211	1656C;1656D	7	3	7	3	7.33032	3.32718	5.16916	7.56086	2.77746	0.367347	-1.44478	0.484262	1
1656D_1179_c0_g1_i1	762	1656C;1656D	25	44	25	44	2.96957	5.29371	33.8696	27.0031	40.7361	1.50857	0.593183	0.633669	1
1656D_11801_c0_g1_i1	837	1656C;1656D	217	172	217	172	22.2697	17.924	196.814	234.387	159.241	0.679394	-0.557679	0.522037	1
1656D_11802_c0_g1_i1	273	1656D	0	7	0	7	0	4.97896	3.24037	0	6.48074	-	-	0.119041	1
1656D_11803_c0_g1_i1	383	1656C;1656D	4	4	4	4	1.56822	1.64188	4.01189	4.32049	3.70328	0.857143	-0.222392	1	1
1656D_11803_c1_g1_i1	225	1656C;1656D	4	1	4	1	3.7062	0.982855	2.62316	4.32049	0.92582	0.214286	-2.22239	0.452547	1
1656D_11804_c0_g1_i1	214	1656C;1656D	5	5	5	5	5.1122	5.38426	5.01486	5.40062	4.6291	0.857143	-0.222392	1	1
1656D_11806_c0_g1_i1	555	1656C;1656D	13	8	13	8	2.65824	1.65034	10.7241	14.0416	7.40656	0.527473	-0.922832	0.573516	1
1656D_11807_c0_g1_i1	1444	1656C;1656D	75	103	75	103	3.66014	5.14381	88.1844	81.0093	95.3595	1.17714	0.235289	0.823357	1
1656D_11808_c0_g1_i1	240	1656C;1656D	1	6	1	6	0.828526	5.30872	3.31752	1.08012	5.55492	5.14286	2.36257	0.372187	1
1656D_11809_c0_g1_i1	258	1656C;1656D	5	3	5	3	3.68606	2.33833	4.08904	5.40062	2.77746	0.514286	-0.959358	0.722412	1
1656D_1180_c0_g1_i1	391	1656C;1656D	9	5	9	5	3.41314	1.97872	7.17511	9.72111	4.6291	0.47619	-1.07039	0.566502	1
1656D_11812_c0_g1_i1	252	1656C;1656D	3	6	3	6	2.29896	4.88022	4.39765	3.24037	5.55492	1.71429	0.777608	0.793982	1
1656D_11813_c0_g1_i1	1176	1656C;1656D	41	20	41	20	2.60396	1.29711	31.4007	44.2851	18.5164	0.418118	-1.25802	0.305807	1
1656D_11815_c0_g1_i1	344	1656C;1656D	4	5	4	5	1.85784	2.45932	4.4748	4.32049	4.6291	1.07143	0.0995357	1	1
1656D_11816_c0_g1_i1	225	1656D	0	6	0	6	0	5.89713	2.77746	0	5.55492	-	-	0.155871	1
1656D_11817_c0_g1_i1	449	1656C;1656D	7	4	7	4	2.09836	1.22696	5.63207	7.56086	3.70328	0.489796	-1.02975	0.626625	1
1656D_11817_c1_g1_i1	405	1656C;1656D	4	3	4	3	1.43268	1.11317	3.54898	4.32049	2.77746	0.642857	-0.63743	0.894145	1
1656D_11818_c0_g1_i1	232	1656C;1656D	1	6	1	6	0.878346	5.60598	3.31752	1.08012	5.55492	5.14286	2.36257	0.372187	1
1656D_1181_c0_g1_i1	247	1656C;1656D	3	1	3	1	2.37056	0.841729	2.0831	3.24037	0.92582	0.285714	-1.80735	0.635182	1
1656D_1181_c1_g1_i1	211	1656C;1656D	1	3	1	3	1.04719	3.32718	1.92879	1.08012	2.77746	2.57143	1.36257	0.808713	1
1656D_11821_c0_g1_i1	1694	1656C;1656D	882	3013	882	3013	35.396	123.89	1871.08	952.669	2789.5	2.92809	1.54996	0.0580351	1
1656D_11821_c1_g1_i1	394	1656D	0	8	0	8	0	3.12443	3.70328	0	7.40656	-	-	0.0931956	1
1656D_11822_c0_g1_i1	802	1656C;1656D	50	58	50	58	5.47925	6.4463	53.8519	54.0062	53.6976	0.994286	-0.00826762	1	1
1656D_11822_c1_g1_i1	264	1656C;1656D	2	3	2	3	1.41284	2.2489	2.46885	2.16025	2.77746	1.28571	0.36257	1	1
1656D_11824_c0_g1_i1	217	1656C;1656D	2	1	2	1	1.98981	1.04489	1.54303	2.16025	0.92582	0.428571	-1.22239	0.915332	1
1656D_11825_c0_g1_i1	444	1656C;1656D	3	13	3	13	0.916536	4.07223	7.63802	3.24037	12.0357	3.71429	1.89308	0.290968	1
1656D_11828_c0_g1_i2	1742	1656C;1656D	309	425	309	425	11.9916	16.9021	363.616	333.758	393.474	1.17892	0.237464	0.771214	1
1656D_1182_c0_g1_i1	434	1656C;1656D	7	1	7	1	2.2222	0.327161	4.24334	7.56086	0.92582	0.122449	-3.02975	0.193965	1
1656D_1182_c1_g1_i1	297	1656C;1656D	3	1	3	1	1.74228	0.617713	2.0831	3.24037	0.92582	0.285714	-1.80735	0.635182	1
1656D_11830_c0_g1_i1	321	1656C;1656D	2	2	2	2	1.0364	1.09565	2.00594	2.16025	1.85164	0.857143	-0.222392	1	1
1656D_11831_c0_g1_i1	228	1656C;1656D	2	2	2	2	1.8119	1.91965	2.00594	2.16025	1.85164	0.857143	-0.222392	1	1
1656D_11831_c1_g1_i1	408	1656C;1656D	4	9	4	9	1.41461	3.29474	6.32644	4.32049	8.33238	1.92857	0.947533	0.648739	1
1656D_11832_c0_g1_i1	264	1656C;1656D	2	3	2	3	1.41284	2.2489	2.46885	2.16025	2.77746	1.28571	0.36257	1	1
1656D_11832_c1_g1_i1	211	1656C;1656D	1	2	1	2	1.04719	2.21812	1.46588	1.08012	1.85164	1.71429	0.777608	1	1
1656D_11833_c0_g1_i1	254	1656C;1656D	4	5	4	5	3.02729	4.00806	4.4748	4.32049	4.6291	1.07143	0.0995357	1	1
1656D_11835_c0_g1_i1	359	1656C;1656D	7	6	7	6	3.04011	2.74878	6.55789	7.56086	5.55492	0.734694	-0.444785	0.881029	1
1656D_11837_c0_g1_i1	207	1656C;1656D	4	6	4	6	4.3435	6.89319	4.93771	4.32049	5.55492	1.28571	0.36257	0.968366	1
1656D_11838_c0_g1_i1	216	1656C;1656D	6	3	6	3	6.01924	3.17264	4.6291	6.48074	2.77746	0.428571	-1.22239	0.58886	1
1656D_11839_c0_g2_i1	2027	1656C;1656D	128	168	128	168	4.15384	5.59217	146.897	138.256	155.538	1.125	0.169925	0.858446	1
1656D_1183_c0_g1_i1	209	1656C;1656D	2	1	2	1	2.13412	1.12884	1.54303	2.16025	0.92582	0.428571	-1.22239	0.915332	1
1656D_1183_c1_g1_i1	288	1656C;1656D	3	3	3	3	1.83226	1.95076	3.00892	3.24037	2.77746	0.857143	-0.222392	1	1
1656D_11840_c0_g1_i1	789	1656C;1656D	10	15	10	15	1.12421	1.70959	12.3443	10.8012	13.8873	1.28571	0.36257	0.857075	1
1656D_11840_c1_g1_i1	292	1656C;1656D	2	5	2	5	1.19379	3.17845	3.39467	2.16025	4.6291	2.14286	1.09954	0.721617	1
1656D_11841_c0_g1_i1	292	1656C;1656D	1	3	1	3	0.596895	1.90707	1.92879	1.08012	2.77746	2.57143	1.36257	0.808713	1
1656D_11841_c1_g1_i1	245	1656C;1656D	2	1	2	1	1.60399	0.852419	1.54303	2.16025	0.92582	0.428571	-1.22239	0.915332	1
1656D_11842_c0_g1_i1	257	1656C;1656D	3	5	3	5	2.22657	3.9264	3.93474	3.24037	4.6291	1.42857	0.514573	0.935572	1
1656D_11843_c0_g1_i1	242	1656C;1656D	2	5	2	5	1.63838	4.36108	3.39467	2.16025	4.6291	2.14286	1.09954	0.721617	1
1656D_11844_c0_g1_i1	373	1656C;1656D	5	10	5	10	2.04487	4.29114	7.32941	5.40062	9.2582	1.71429	0.777608	0.702285	1
1656D_11845_c0_g1_i1	992	1656C;1656D	188	184	188	184	15.0557	15.0117	186.707	203.063	170.351	0.838906	-0.253419	0.776045	1
1656D_11847_c0_g1_i1	206	1656C;1656D	1	7	1	7	1.09604	8.12473	3.78043	1.08012	6.48074	6	2.58496	0.298202	1
1656D_11848_c0_g1_i1	227	1656C;1656D	5	1	5	1	4.56661	0.966069	3.16322	5.40062	0.92582	0.171429	-2.54432	0.332471	1
1656D_11852_c0_g1_i1	267	1656C;1656D	5	7	5	7	3.47018	5.15052	5.94068	5.40062	6.48074	1.2	0.263034	0.9921	1
1656D_11853_c0_g1_i1	255	1656D	0	9	0	9	0	7.17367	4.16619	0	8.33238	-	-	0.0743623	1
1656D_11854_c0_g1_i1	323	1656D	0	4.64186	0	5	0	2.51925	2.31455	0	4.6291	-	-	0.210896	1
1656D_11854_c0_g2_i1	1050	1656C;1656D	80	80.3581	80	80	5.91978	6.06304	80.2377	86.4099	74.0656	0.857143	-0.222392	0.837175	1
1656D_11855_c0_g1_i1	508	1656C;1656D	7	8	7	8	1.68284	1.94409	7.48371	7.56086	7.40656	0.979592	-0.0297473	1	1
1656D_11856_c0_g1_i1	280	1656C;1656D	8	2	8	2	5.12712	1.36213	5.24631	8.64099	1.85164	0.214286	-2.22239	0.2727	1
1656D_11857_c0_g1_i1	304	1656C;1656D	4	4	4	4	2.24633	2.39215	4.01189	4.32049	3.70328	0.857143	-0.222392	1	1
1656D_11859_c0_g1_i1	249	1656C;1656D	1	7	1	7	0.783052	5.8083	3.78043	1.08012	6.48074	6	2.58496	0.298202	1
1656D_11860_c0_g1_i1	259	1656C;1656D	2	6	2	6	1.46176	4.64902	3.85758	2.16025	5.55492	2.57143	1.36257	0.59295	1
1656D_11861_c0_g1_i1	348	1656C;1656D	6	3	6	3	2.73952	1.44982	4.6291	6.48074	2.77746	0.428571	-1.22239	0.58886	1
1656D_11861_c1_g1_i1	257	1656C;1656D	2	5	2	5	1.48438	3.9264	3.39467	2.16025	4.6291	2.14286	1.09954	0.721617	1
1656D_11862_c0_g1_i1	215	1656C;1656D	3	1	3	1	3.03585	1.06825	2.0831	3.24037	0.92582	0.285714	-1.80735	0.635182	1
1656D_11862_c1_g1_i1	221	1656C;1656D	3	3	3	3	2.88521	3.04862	3.00892	3.24037	2.77746	0.857143	-0.222392	1	1
1656D_11864_c0_g1_i1	290	1656C;1656D	2	5	2	5	1.20637	3.21189	3.39467	2.16025	4.6291	2.14286	1.09954	0.721617	1
1656D_11865_c0_g1_i1	534	1656C;1656D	47	14	47	14	10.3021	3.10043	31.8636	50.7658	12.9615	0.255319	-1.96963	0.113647	1
1656D_11866_c0_g1_i1	350	1656C;1656D	13	1	13	1	5.87885	0.47853	7.48371	14.0416	0.92582	0.0659341	-3.92283	0.0556724	1
1656D_11867_c0_g1_i1	249	1656C	5	0	5	0	3.91526	0	2.70031	5.40062	0	0	-	0.138223	1
1656D_11867_c1_g1_i1	406	1656C;1656D	26	6	26	6	9.27255	2.21578	16.8191	28.0832	5.55492	0.197802	-2.33787	0.10569	1
1656D_11868_c0_g1_i1	283	1656C;1656D	9	4	9	4	5.65751	2.68114	6.7122	9.72111	3.70328	0.380952	-1.39232	0.45209	1
1656D_11869_c0_g1_i1	205	1656C;1656D	2	1	2	1	2.21882	1.16756	1.54303	2.16025	0.92582	0.428571	-1.22239	0.915332	1
1656D_11869_c1_g1_i1	477	1656C;1656D	11	9	11	9	2.96711	2.46207	10.1069	11.8814	8.33238	0.701299	-0.511899	0.79148	1
1656D_11871_c0_g1_i1	226	1656C	3	0	3	0	2.75621	0	1.62019	3.24037	0	0	-	0.316445	1
1656D_11871_c1_g1_i1	226	1656C	2	0	2	0	1.83748	0	1.08012	2.16025	0	0	-	0.522231	1
1656D_11872_c0_g2_i1	213	1656C;1656D	4	9	4	9	4.13139	9.77618	6.32644	4.32049	8.33238	1.92857	0.947533	0.648739	1
1656D_11873_c0_g1_i1	651	1656C;1656D	11	13	11	13	1.69529	2.0213	11.9585	11.8814	12.0357	1.01299	0.0186157	1	1
1656D_11873_c1_g1_i1	262	1656C;1656D	3	4	3	4	2.15129	3.04338	3.47183	3.24037	3.70328	1.14286	0.192645	1	1
1656D_11874_c0_g1_i1	221	1656D	0	2	0	2	0	2.03241	0.92582	0	1.85164	-	-	0.653038	1
1656D_11876_c0_g1_i1	240	1656C;1656D	2	3	2	3	1.65705	2.65436	2.46885	2.16025	2.77746	1.28571	0.36257	1	1
1656D_11876_c1_g1_i1	292	1656C;1656D	6	1	6	1	3.58137	0.63569	3.70328	6.48074	0.92582	0.142857	-2.80735	0.251097	1
1656D_11878_c0_g1_i1	212	1656C;1656D	2	1	2	1	2.07704	1.09752	1.54303	2.16025	0.92582	0.428571	-1.22239	0.915332	1
1656D_11878_c1_g1_i1	202	1656C	1	0	1	0	1.14201	0	0.540062	1.08012	0	0	-	0.940866	1
1656D_1187_c0_g1_i1	269	1656C;1656D	3	8	3	8	2.05755	5.81281	5.32347	3.24037	7.40656	2.28571	1.19265	0.580843	1
1656D_11881_c0_g1_i1	280	1656C;1656D	5	6	5	6	3.20445	4.08639	5.47777	5.40062	5.55492	1.02857	0.040642	1	1
1656D_11882_c0_g1_i1	384	1656C;1656D	5	7	5	7	1.95266	2.86138	5.94068	5.40062	6.48074	1.2	0.263034	0.9921	1
1656D_11883_c0_g1_i1	269	1656C;1656D	7	6	7	6	4.80094	4.35961	6.55789	7.56086	5.55492	0.734694	-0.444785	0.881029	1
1656D_11887_c0_g1_i1	414	1656C;1656D	8	7	8	7	2.76278	2.49296	7.56086	8.64099	6.48074	0.75	-0.415037	0.878186	1
1656D_11889_c0_g1_i1	231	1656C;1656D	8	1	8	1	7.06693	0.940852	4.7834	8.64099	0.92582	0.107143	-3.22239	0.152555	1
1656D_11891_c0_g1_i1	298	1656C	2	0	2	0	1.15598	0	1.08012	2.16025	0	0	-	0.522231	1
1656D_11891_c1_g1_i1	270	1656C;1656D	7	2	7	2	4.77233	1.44461	4.70625	7.56086	1.85164	0.244898	-2.02975	0.336922	1
1656D_11892_c0_g1_i1	296	1656C;1656D	11	11	11	11	6.42373	6.83511	11.0327	11.8814	10.184	0.857143	-0.222392	0.946597	1
1656D_11893_c0_g1_i1	692	1656C;1656D	3	29	3	29	0.416884	4.07503	15.0446	3.24037	26.8488	8.28571	3.05063	0.0538815	1
1656D_11895_c0_g1_i1	268	1656C;1656D	3	3	3	3	2.0721	2.19328	3.00892	3.24037	2.77746	0.857143	-0.222392	1	1
1656D_11897_c0_g1_i1	281	1656C;1656D	4	3	4	3	2.54548	2.03331	3.54898	4.32049	2.77746	0.642857	-0.63743	0.894145	1
1656D_1189_c0_g1_i1	354	1656C;1656D	3	4	3	4	1.33092	1.87596	3.47183	3.24037	3.70328	1.14286	0.192645	1	1
1656D_1189_c1_g1_i1	337	1656C;1656D	3	4	3	4	1.43921	2.03234	3.47183	3.24037	3.70328	1.14286	0.192645	1	1
1656D_118_c0_g1_i1	321	1656C;1656D	4	6	4	6	2.07281	3.28694	4.93771	4.32049	5.55492	1.28571	0.36257	0.968366	1
1656D_11900_c0_g1_i1	204	1656C;1656D	2	5	2	5	2.24322	5.88615	3.39467	2.16025	4.6291	2.14286	1.09954	0.721617	1
1656D_11901_c0_g1_i1	2166	1656C;1656D	1099	1436	1099	1436	33.0265	44.2793	1258.27	1187.06	1329.48	1.11998	0.163472	0.835835	1
1656D_11902_c0_g1_i1	210	1656C;1656D	1	3	1	3	1.05907	3.35608	1.92879	1.08012	2.77746	2.57143	1.36257	0.808713	1
1656D_11902_c1_g1_i1	268	1656C;1656D	2	3	2	3	1.3814	2.19328	2.46885	2.16025	2.77746	1.28571	0.36257	1	1
1656D_11906_c0_g1_i1	229	1656C;1656D	2	5	2	5	1.79788	4.76938	3.39467	2.16025	4.6291	2.14286	1.09954	0.721617	1
1656D_11909_c0_g2_i1	987	1656C;1656D	79	51	79	51	6.37178	4.19021	66.2733	85.3298	47.2168	0.553345	-0.853748	0.422726	1
1656D_1190_c0_g1_i1	285	1656C;1656D	5	2	5	2	3.10986	1.32358	3.62613	5.40062	1.85164	0.342857	-1.54432	0.534519	1
1656D_1190_c1_g1_i1	268	1656C;1656D	7	3	7	3	4.83491	2.19328	5.16916	7.56086	2.77746	0.367347	-1.44478	0.484262	1
1656D_11912_c0_g1_i1	296	1656C;1656D	5	3	5	3	2.91988	1.86412	4.08904	5.40062	2.77746	0.514286	-0.959358	0.722412	1
1656D_11913_c0_g1_i1	404	1656C;1656D	12	11	12	11	4.31716	4.10403	11.5728	12.9615	10.184	0.785714	-0.347923	0.869569	1
1656D_11914_c0_g1_i1	238	1656C;1656D	2	5	2	5	1.6868	4.48852	3.39467	2.16025	4.6291	2.14286	1.09954	0.721617	1
1656D_11915_c0_g1_i1	212	1656C;1656D	2	2	2	2	2.07704	2.19505	2.00594	2.16025	1.85164	0.857143	-0.222392	1	1
1656D_11916_c0_g1_i1	253	1656C;1656D	7	3	7	3	5.32961	2.425	5.16916	7.56086	2.77746	0.367347	-1.44478	0.484262	1
1656D_11918_c0_g1_i1	210	1656C;1656D	2	4	2	4	2.11815	4.47477	2.93176	2.16025	3.70328	1.71429	0.777608	0.88701	1
1656D_11919_c0_g1_i1	744	1656C;1656D	91	74	91	74	11.2312	9.24528	83.401	98.2912	68.5107	0.697017	-0.520734	0.611319	1
1656D_1191_c0_g1_i1	522	1656C;1656D	19	38	19	38	4.34413	8.77866	27.8518	20.5223	35.1812	1.71429	0.777608	0.544172	1
1656D_11920_c0_g1_i1	343	1656C;1656D	3	5	3	5	1.40108	2.46946	3.93474	3.24037	4.6291	1.42857	0.514573	0.935572	1
1656D_11920_c1_g1_i1	425	1656C;1656D	5	6	5	6	1.65024	2.03892	5.47777	5.40062	5.55492	1.02857	0.040642	1	1
1656D_11921_c0_g1_i1	612	1656C;1656D	5	25	5	25	0.858741	4.32541	14.2731	5.40062	23.1455	4.28571	2.09954	0.163669	1
1656D_11926_c0_g1_i1	312	1656C;1656D	8	5	8	5	4.32169	2.86397	6.63504	8.64099	4.6291	0.535714	-0.900464	0.654634	1
1656D_11930_c0_g1_i1	547	1656C;1656D	9	7	9	7	1.88933	1.48314	8.10093	9.72111	6.48074	0.666667	-0.584963	0.779495	1
1656D_11930_c1_g1_i1	315	1656C;1656D	8	6	8	6	4.26236	3.39359	7.09795	8.64099	5.55492	0.642857	-0.63743	0.770856	1
1656D_11931_c0_g1_i1	701	1656C;1656D	6	43	6	43	0.816028	5.91495	23.1455	6.48074	39.8103	6.14286	2.61891	0.0590616	1
1656D_11932_c0_g1_i1	238	1656C;1656D	1	9	1	9	0.8434	8.07933	4.70625	1.08012	8.33238	7.71429	2.94753	0.199538	1
1656D_11933_c0_g2_i1	260	1656C;1656D	4	6	4	6	2.90617	4.61972	4.93771	4.32049	5.55492	1.28571	0.36257	0.968366	1
1656D_11934_c0_g1_i1	1978	1656C;1656D	6	97	6	97	0.200353	3.32191	48.1426	6.48074	89.8045	13.8571	3.79256	0.00336433	0.251069
1656D_11935_c0_g1_i1	303	1656C;1656D	5	5	5	5	2.81959	3.00746	5.01486	5.40062	4.6291	0.857143	-0.222392	1	1
1656D_11936_c0_g1_i1	225	1656C;1656D	5	2	5	2	4.63275	1.96571	3.62613	5.40062	1.85164	0.342857	-1.54432	0.534519	1
1656D_11939_c0_g1_i1	1228	1656C;1656D	20	15	20	15	1.20004	0.919544	17.7449	21.6025	13.8873	0.642857	-0.63743	0.662707	1
1656D_11939_c1_g1_i1	303	1656C	10	0	10	0	5.63917	0	5.40062	10.8012	0	0	-	0.0336981	0.861749
1656D_11940_c0_g1_i1	224	1656C;1656D	3	3	3	3	2.79948	2.96813	3.00892	3.24037	2.77746	0.857143	-0.222392	1	1
1656D_11942_c0_g1_i1	204	1656C;1656D	6	5	6	5	6.72965	5.88615	5.55492	6.48074	4.6291	0.714286	-0.485427	0.884459	1
1656D_11944_c0_g1_i1	205	1656C	4	0	4	0	4.43763	0	2.16025	4.32049	0	0	-	0.204074	1
1656D_11945_c0_g1_i1	433	1656C;1656D	9	2	9	2	2.86966	0.657081	5.78638	9.72111	1.85164	0.190476	-2.39232	0.223188	1
1656D_11945_c1_g1_i1	371	1656C	10	0	10	0	4.1204	0	5.40062	10.8012	0	0	-	0.0336981	0.861749
1656D_11946_c0_g1_i1	262	1656D	0	7	0	7	0	5.32591	3.24037	0	6.48074	-	-	0.119041	1
1656D_11947_c0_g1_i1	329	1656C;1656D	4	1	4	1	1.98907	0.528087	2.62316	4.32049	0.92582	0.214286	-2.22239	0.452547	1
1656D_11947_c1_g1_i1	322	1656D	0	4	0	4	0	2.18153	1.85164	0	3.70328	-	-	0.295121	1
1656D_11950_c0_g1_i1	301	1656C;1656D	6	9	6	9	3.41477	5.47039	7.40656	6.48074	8.33238	1.28571	0.36257	0.911785	1
1656D_11951_c0_g1_i1	336	1656C;1656D	20	30	20	30	9.64399	15.3165	24.6885	21.6025	27.7746	1.28571	0.36257	0.801849	1
1656D_11952_c0_g1_i1	203	1656C;1656D	5	1	5	1	5.6528	1.18743	3.16322	5.40062	0.92582	0.171429	-2.54432	0.332471	1
1656D_11953_c0_g1_i1	259	1656C;1656D	5	6	5	6	3.6544	4.64902	5.47777	5.40062	5.55492	1.02857	0.040642	1	1
1656D_11955_c0_g1_i1	224	1656C;1656D	5	1	5	1	4.6658	0.989378	3.16322	5.40062	0.92582	0.171429	-2.54432	0.332471	1
1656D_11956_c0_g1_i1	213	1656D	0	7	0	7	0	7.6037	3.24037	0	6.48074	-	-	0.119041	1
1656D_11959_c0_g1_i1	217	1656D	0	10	0	10	0	10.4489	4.6291	0	9.2582	-	-	0.0602193	1
1656D_11960_c0_g1_i1	678	1656C;1656D	159	137	159	137	22.8715	19.9124	149.288	171.74	126.837	0.738544	-0.437243	0.632867	1
1656D_11965_c0_g1_i1	205	1656C;1656D	5.35437	7	5	7	5.94018	8.17292	5.94068	5.40062	6.48074	1.2	0.263034	0.9921	1
1656D_11966_c0_g1_i1	311	1656C;1656D	5	6	5	6	2.71681	3.45186	5.47777	5.40062	5.55492	1.02857	0.040642	1	1
1656D_11967_c0_g1_i1	1126	1656C;1656D	95	60	95	60	6.39307	4.12096	79.0805	102.612	55.5492	0.541353	-0.885357	0.388819	1
1656D_11968_c0_g1_i1	313	1656C;1656D	4	5	4	5	2.14771	2.85412	4.4748	4.32049	4.6291	1.07143	0.0995357	1	1
1656D_11968_c1_g1_i1	310	1656C;1656D	2	4	2	4	1.09183	2.31322	2.93176	2.16025	3.70328	1.71429	0.777608	0.88701	1
1656D_11970_c0_g1_i1	819	1656C;1656D	20	13	20	13	2.12192	1.3997	16.8191	21.6025	12.0357	0.557143	-0.843881	0.55769	1
1656D_11973_c0_g1_i1	318	1656C;1656D	6	9	6	9	3.15437	5.00831	7.40656	6.48074	8.33238	1.28571	0.36257	0.911785	1
1656D_11974_c0_g1_i1	235	1656C;1656D	6	1	6	1	5.1622	0.913998	3.70328	6.48074	0.92582	0.142857	-2.80735	0.251097	1
1656D_11975_c0_g1_i1	263	1656C;1656D	4	7	4	7	2.84806	5.28744	5.40062	4.32049	6.48074	1.5	0.584963	0.844754	1
1656D_11975_c1_g1_i1	317	1656C;1656D	7	2	7	2	3.69507	1.1184	4.70625	7.56086	1.85164	0.244898	-2.02975	0.336922	1
1656D_11976_c0_g1_i1	241	1656C;1656D	2	4	2	4	1.64769	3.51468	2.93176	2.16025	3.70328	1.71429	0.777608	0.88701	1
1656D_11976_c1_g1_i1	205	1656C	1	0	1	0	1.10941	0	0.540062	1.08012	0	0	-	0.940866	1
1656D_11978_c0_g1_i1	260	1656C;1656D	5	4	5	4	3.63271	3.07982	4.55195	5.40062	3.70328	0.685714	-0.544321	0.888737	1
1656D_11979_c0_g1_i1	227	1656C;1656D	4	4	4	4	3.65329	3.86428	4.01189	4.32049	3.70328	0.857143	-0.222392	1	1
1656D_1197_c0_g2_i1	339	1656C;1656D	4	7	4	7	1.90123	3.52313	5.40062	4.32049	6.48074	1.5	0.584963	0.844754	1
1656D_11980_c0_g1_i1	269	1656C;1656D	7	7	7	7	4.80094	5.08621	7.0208	7.56086	6.48074	0.857143	-0.222392	0.990747	1
1656D_11981_c0_g1_i1	389	1656C;1656D	8	6	8	6	3.06291	2.3946	7.09795	8.64099	5.55492	0.642857	-0.63743	0.770856	1
1656D_11982_c0_g1_i1	324	1656C;1656D	7	1	7	1	3.57132	0.540645	4.24334	7.56086	0.92582	0.122449	-3.02975	0.193965	1
1656D_11983_c0_g1_i1	304	1656C;1656D	8	2	8	2	4.49267	1.19608	5.24631	8.64099	1.85164	0.214286	-2.22239	0.2727	1
1656D_11985_c0_g1_i1	257	1656C	2	0	2	0	1.48438	0	1.08012	2.16025	0	0	-	0.522231	1
1656D_11986_c0_g1_i1	264	1656C;1656D	5	5	5	5	3.5321	3.74817	5.01486	5.40062	4.6291	0.857143	-0.222392	1	1
1656D_11989_c0_g1_i1	430	1656C;1656D	4	4	4	4	1.29201	1.32881	4.01189	4.32049	3.70328	0.857143	-0.222392	1	1
1656D_11991_c0_g1_i1	228	1656C;1656D	2	5	2	5	1.8119	4.79911	3.39467	2.16025	4.6291	2.14286	1.09954	0.721617	1
1656D_11992_c0_g1_i1	245	1656C;1656D	4	2	4	2	3.20799	1.70484	3.08607	4.32049	1.85164	0.428571	-1.22239	0.688967	1
1656D_11993_c0_g1_i1	865	1656C;1656D	34	16	34	16	3.32095	1.58774	25.7687	36.7242	14.8131	0.403361	-1.30986	0.305925	1
1656D_11996_c0_g1_i1	521	1656C;1656D	23	12	23	12	5.27348	2.78211	17.9763	24.8428	11.1098	0.447205	-1.16099	0.40314	1
1656D_11997_c0_g1_i1	212	1656C;1656D	4	3	4	3	4.15408	3.29257	3.54898	4.32049	2.77746	0.642857	-0.63743	0.894145	1
1656D_11998_c0_g1_i1	246	1656C	8	0	8	0	6.37141	0	4.32049	8.64099	0	0	-	0.0552302	1
1656D_1199_c0_g1_i1	216	1656C	8	0	8	0	8.02565	0	4.32049	8.64099	0	0	-	0.0552302	1
1656D_119_c0_g1_i1	281	1656C;1656D	2	6	2	6	1.27274	4.06662	3.85758	2.16025	5.55492	2.57143	1.36257	0.59295	1
1656D_12002_c0_g1_i1	217	1656C;1656D	3	3	3	3	2.98471	3.13468	3.00892	3.24037	2.77746	0.857143	-0.222392	1	1
1656D_12004_c0_g1_i1	237	1656C	6	0	6	0	5.09915	0	3.24037	6.48074	0	0	-	0.0984225	1
1656D_12005_c0_g1_i1	373	1656C;1656D	7	2	7	2	2.86282	0.858228	4.70625	7.56086	1.85164	0.244898	-2.02975	0.336922	1
1656D_12005_c1_g1_i1	387	1656C;1656D	8	6	8	6	3.091	2.41599	7.09795	8.64099	5.55492	0.642857	-0.63743	0.770856	1
1656D_12006_c0_g1_i1	314	1656C;1656D	1	8	1	8	0.534812	4.55086	4.24334	1.08012	7.40656	6.85714	2.77761	0.242454	1
1656D_12007_c0_g1_i1	203	1656C;1656D	4	1	4	1	4.52224	1.18743	2.62316	4.32049	0.92582	0.214286	-2.22239	0.452547	1
1656D_12008_c0_g1_i1	2063	1656C;1656D	3867	1849	3867	1849	122.948	60.3053	2944.34	4176.84	1711.84	0.409842	-1.28686	0.12802	1
1656D_12011_c0_g1_i1	321	1656C	5	0	5	0	2.59101	0	2.70031	5.40062	0	0	-	0.138223	1
1656D_12011_c1_g1_i1	218	1656C	5	0	5	0	4.93947	0	2.70031	5.40062	0	0	-	0.138223	1
1656D_12012_c0_g1_i2	1652	1656C;1656D	6806	6440	6806	6440	281.539	272.902	6656.8	7351.32	5962.28	0.811049	-0.302139	0.74723	1
1656D_12013_c0_g1_i1	1041	1656C;1656D	162	255	162	255	12.1306	19.4669	205.532	174.98	236.084	1.34921	0.432111	0.618807	1
1656D_12015_c0_g1_i1	486	1656C;1656D	220.534	116.779	221	117	57.5678	30.8107	173.514	238.707	108.321	0.453782	-1.13993	0.200913	1
1656D_12015_c0_g2_i1	2198	1656C;1656D	44691.5	34012.2	44692	34012	1320.55	1031.28	39880.9	48272.9	31489	0.652312	-0.616365	0.711	1
1656D_12017_c0_g1_i1	270	1656C;1656D	2	5	2	5	1.36352	3.61152	3.39467	2.16025	4.6291	2.14286	1.09954	0.721617	1
1656D_12019_c0_g1_i1	629	1656C;1656D	6	13	6	13	0.981945	2.14374	9.2582	6.48074	12.0357	1.85714	0.893085	0.613009	1
1656D_12020_c0_g1_i1	287	1656D	0	8	0	8	0	5.22805	3.70328	0	7.40656	-	-	0.0931956	1
1656D_12021_c0_g1_i1	312	1656C;1656D	4	3	4	3	2.16085	1.71838	3.54898	4.32049	2.77746	0.642857	-0.63743	0.894145	1
1656D_12023_c0_g1_i1	273	1656D	0	14	0	14	0	9.95791	6.48074	0	12.9615	-	-	0.0288114	0.812388
1656D_12024_c0_g1_i1	253	1656C;1656D	2	6	2	6	1.52274	4.85001	3.85758	2.16025	5.55492	2.57143	1.36257	0.59295	1
1656D_12025_c0_g1_i1	409	1656C;1656D	1	14	1	14	0.352204	5.10182	7.0208	1.08012	12.9615	12	3.58496	0.0862249	1
1656D_12026_c0_g1_i1	362	1656C;1656D	3	4	3	4	1.28468	1.80575	3.47183	3.24037	3.70328	1.14286	0.192645	1	1
1656D_12026_c1_g1_i1	274	1656C;1656D	2	2	2	2	1.33097	1.41372	2.00594	2.16025	1.85164	0.857143	-0.222392	1	1
1656D_12027_c0_g1_i1	2497	1656C;1656D	67	195	67	195	1.71191	5.11566	126.452	72.3683	180.535	2.49467	1.31885	0.163228	1
1656D_12028_c0_g1_i1	1111	1656C;1656D	291	465	291	465	19.9394	32.513	372.411	314.316	430.506	1.36966	0.453819	0.575068	1
1656D_12029_c0_g1_i1	840	1656C;1656D	120	42	120	42	12.2483	4.35341	84.2496	129.615	38.8844	0.3	-1.73697	0.0916366	1
1656D_1202_c0_g1_i1	202	1656C;1656D	1	1	1	1	1.14201	1.19733	1.00297	1.08012	0.92582	0.857143	-0.222392	1	1
1656D_1202_c1_g1_i1	218	1656D	0	1	0	1	0	1.03594	0.46291	0	0.92582	-	-	1	1
1656D_12030_c0_g1_i1	573	1656C;1656D	21	4	21	4	4.05569	0.77874	13.1929	22.6826	3.70328	0.163265	-2.61471	0.0927169	1
1656D_12030_c1_g1_i1	1722	1656C;1656D	91	7	91	7	3.58072	0.282246	52.386	98.2912	6.48074	0.0659341	-3.92283	0.00198863	0.1747
1656D_12033_c0_g1_i1	262	1656C	6	0	6	0	4.30258	0	3.24037	6.48074	0	0	-	0.0984225	1
1656D_12033_c1_g1_i1	236	1656C;1656D	2	1	2	1	1.71106	0.910739	1.54303	2.16025	0.92582	0.428571	-1.22239	0.915332	1
1656D_12036_c0_g1_i1	1388	1656C;1656D	1029.73	1042.98	1030	1043	52.8085	54.7158	1039.08	1112.53	965.63	0.867961	-0.204298	0.794343	1
1656D_12037_c0_g1_i1	2312	1656C;1656D	66	183	66	183	1.84041	5.23765	120.357	71.2881	169.425	2.37662	1.24891	0.190059	1
1656D_12038_c0_g1_i1	5883	1656C;1656D	326	191	326	191	3.28969	1.98335	264.476	352.12	176.832	0.502191	-0.993692	0.23608	1
1656D_12039_c0_g1_i1	312	1656C;1656D	3	4	3	4	1.62063	2.29117	3.47183	3.24037	3.70328	1.14286	0.192645	1	1
1656D_12039_c1_g1_i1	208	1656C;1656D	1	1	1	1	1.07869	1.13803	1.00297	1.08012	0.92582	0.857143	-0.222392	1	1
1656D_12040_c0_g1_i1	212	1656D	0	3	0	3	0	3.29257	1.38873	0	2.77746	-	-	0.428162	1
1656D_12042_c0_g1_i1	1803	1656C;1656D	319	324	319	324	11.8816	12.3697	322.263	344.559	299.966	0.870578	-0.199955	0.809243	1
1656D_12043_c0_g1_i1	648	1656C;1656D	28	25	28	25	4.35002	3.91773	26.6945	30.2435	23.1455	0.765306	-0.385891	0.780271	1
1656D_12044_c0_g1_i1	2068	1656C;1656D	1203	1056	1203	1056	38.141	34.3453	1138.53	1299.39	977.666	0.752405	-0.410419	0.60045	1
1656D_12046_c0_g1_i1	452	1656C;1656D	17	40	17	40	5.03715	12.1212	27.6975	18.3621	37.0328	2.01681	1.01207	0.42593	1
1656D_12046_c1_g1_i1	271	1656C;1656D	14	28	14	28	9.48809	20.1642	20.5223	15.1217	25.923	1.71429	0.777608	0.574306	1
1656D_12047_c0_g1_i1	262	1656C;1656D	3	1	3	1	2.15129	0.760844	2.0831	3.24037	0.92582	0.285714	-1.80735	0.635182	1
1656D_12047_c1_g1_i1	304	1656C;1656D	6	2	6	2	3.3695	1.19608	4.16619	6.48074	1.85164	0.285714	-1.80735	0.421356	1
1656D_12048_c0_g1_i1	1252	1656C;1656D	44	10	44	10	2.57444	0.597913	28.3918	47.5254	9.2582	0.194805	-2.3599	0.0683875	1
1656D_12049_c0_g1_i1	214	1656C;1656D	4	3	4	3	4.08976	3.23055	3.54898	4.32049	2.77746	0.642857	-0.63743	0.894145	1
1656D_12049_c1_g1_i1	461	1656C;1656D	5	10	5	10	1.43306	2.91616	7.32941	5.40062	9.2582	1.71429	0.777608	0.702285	1
1656D_1204_c0_g1_i1	421	1656C;1656D	11	12	11	12	3.69231	4.14534	11.4956	11.8814	11.1098	0.935065	-0.0968615	1	1
1656D_12052_c0_g1_i1	1516	1656C;1656D	101	150	101	150	4.64026	7.05508	123.983	109.092	138.873	1.27298	0.348215	0.715648	1
1656D_12054_c0_g1_i1	497	1656C;1656D	14	8	14	8	3.50796	2.02412	11.2641	15.1217	7.40656	0.489796	-1.02975	0.517795	1
1656D_12056_c0_g1_i1	404	1656C;1656D	5	5	5	5	1.79882	1.86547	5.01486	5.40062	4.6291	0.857143	-0.222392	1	1
1656D_12057_c0_g1_i1	202	1656C;1656D	5	2	5	2	5.71003	2.39466	3.62613	5.40062	1.85164	0.342857	-1.54432	0.534519	1
1656D_12059_c0_g1_i1	652	1656C;1656D	12	13	12	13	1.84437	2.01612	12.4986	12.9615	12.0357	0.928571	-0.106915	1	1
1656D_12060_c0_g2_i1	1274	1656C;1656D	404	125	404	125	23.1113	7.30871	276.049	436.37	115.728	0.265205	-1.91482	0.024996	0.778326
1656D_12063_c0_g1_i1	1827	1656C;1656D	122	334	122	334	4.47325	12.5539	220.499	131.775	309.224	2.3466	1.23057	0.153861	1
1656D_12064_c0_g1_i1	3276	1656C;1656D	663.927	766.551	664	767	12.543	14.8833	713.653	717.202	710.104	0.990103	-0.0143491	0.987264	1
1656D_12064_c0_g2_i1	2351	1656C;1656D	126.073	108.449	126	108	3.44911	3.04552	118.042	136.096	99.9886	0.734694	-0.444785	0.642174	1
1656D_12065_c0_g1_i1	401	1656C;1656D	7.00864	5	7	5	2.55436	1.89167	6.09498	7.56086	4.6291	0.612245	-0.707819	0.75953	1
1656D_12066_c0_g1_i1	203	1656C;1656D	3	2	3	2	3.39168	2.37485	2.54601	3.24037	1.85164	0.571429	-0.807355	0.902082	1
1656D_12066_c1_g1_i1	217	1656C;1656D	2	4	2	4	1.98981	4.17958	2.93176	2.16025	3.70328	1.71429	0.777608	0.88701	1
1656D_12067_c0_g1_i1	1795	1656C;1656D	161	269	161	269	6.02848	10.3241	211.473	173.9	249.046	1.43212	0.518153	0.548321	1
1656D_12068_c0_g1_i1	527	1656C;1656D	11	15	11	15	2.4712	3.40644	12.8843	11.8814	13.8873	1.16883	0.225067	0.933785	1
1656D_12069_c0_g1_i1	862	1656C;1656D	43	43	43	43	4.22194	4.289	43.1278	46.4453	39.8103	0.857143	-0.222392	0.864099	1
1656D_1206_c0_g1_i1	239	1656C;1656D	6	1	6	1	5.01849	0.891419	3.70328	6.48074	0.92582	0.142857	-2.80735	0.251097	1
1656D_12070_c0_g2_i1	3753	1656C;1656D	361	335	361	335	5.88148	5.61132	350.037	389.925	310.15	0.79541	-0.33023	0.685358	1
1656D_12071_c0_g1_i1	634	1656D	0	37	0	37	0	6.01738	17.1277	0	34.2553	-	-	0.00176311	0.161266
1656D_12072_c0_g1_i1	324	1656C;1656D	7	2	7	2	3.57132	1.08129	4.70625	7.56086	1.85164	0.244898	-2.02975	0.336922	1
1656D_12073_c0_g1_i1	3387	1656C;1656D	2703	2986	2703	2986	49.2369	55.9055	2842.04	2919.57	2764.5	0.946884	-0.0787398	0.924716	1
1656D_12074_c0_g1_i1	329	1656C	5.09474	0	5	0	2.53345	0	2.70031	5.40062	0	0	-	0.138223	1
1656D_12074_c0_g2_i1	700	1656C;1656D	16.9053	18	17	18	2.30428	2.48189	17.5134	18.3621	16.6648	0.907563	-0.13993	0.963838	1
1656D_12074_c1_g1_i1	1947	1656C;1656D	73	53	73	53	2.48314	1.84879	63.9587	78.849	49.0685	0.622309	-0.684297	0.524978	1
1656D_12075_c0_g1_i1	299	1656C;1656D	5	6	5	6	2.87871	3.67829	5.47777	5.40062	5.55492	1.02857	0.040642	1	1
1656D_12077_c0_g1_i1	2505	1656C;1656D	898	827	898	827	22.8619	21.6177	867.802	969.951	765.653	0.789373	-0.341221	0.662349	1
1656D_12078_c0_g2_i1	582	1656C;1656D	5	14	5	14	0.938974	2.64802	9.18105	5.40062	12.9615	2.4	1.26303	0.456933	1
1656D_12079_c0_g1_i1	309	1656C;1656D	5	1	5	1	2.74523	0.581238	3.16322	5.40062	0.92582	0.171429	-2.54432	0.332471	1
1656D_12079_c1_g1_i1	238	1656C;1656D	3	4	3	4	2.5302	3.59081	3.47183	3.24037	3.70328	1.14286	0.192645	1	1
1656D_1207_c0_g1_i1	381	1656C;1656D	3	5	3	5	1.18709	2.07212	3.93474	3.24037	4.6291	1.42857	0.514573	0.935572	1
1656D_1207_c1_g1_i1	508	1656C;1656D	5	4	5	4	1.20203	0.972044	4.55195	5.40062	3.70328	0.685714	-0.544321	0.888737	1
1656D_12081_c0_g1_i1	1043	1656C;1656D	593	185	593	185	44.2866	14.0861	405.895	640.513	171.277	0.267405	-1.9029	0.0211073	0.717393
1656D_12083_c0_g1_i1	405	1656C;1656D	7	2	7	2	2.50719	0.742114	4.70625	7.56086	1.85164	0.244898	-2.02975	0.336922	1
1656D_12083_c1_g1_i1	2408	1656C;1656D	805	1041	805	1041	21.4314	28.4512	916.639	869.499	963.779	1.10843	0.148517	0.850195	1
1656D_12084_c0_g1_i1	1498	1656C;1656D	1209	1446	1209	1446	56.3708	69.015	1322.3	1305.87	1338.74	1.02517	0.0358609	0.964746	1
1656D_12085_c0_g1_i1	1032	1656C;1656D	231	155	231	155	17.5063	11.9742	196.505	249.509	143.502	0.575139	-0.798017	0.359477	1
1656D_12086_c0_g2_i1	2119	1656C;1656D	90	114	90	114	2.77401	3.60498	101.377	97.2111	105.543	1.08571	0.118644	0.913142	1
1656D_12087_c0_g1_i1	216	1656C	7	0	7	0	7.02244	0	3.78043	7.56086	0	0	-	0.0727312	1
1656D_12089_c0_g1_i1	268	1656C;1656D	8	2	8	2	5.52561	1.46219	5.24631	8.64099	1.85164	0.214286	-2.22239	0.2727	1
1656D_12090_c0_g1_i1	2901	1656C;1656D	14880	29626	14880	29626	321.44	657.473	21750.3	16072.2	27428.3	1.70657	0.771097	0.549723	1
1656D_12091_c0_g1_i1	220	1656C;1656D	2	5	2	5	1.94246	5.10979	3.39467	2.16025	4.6291	2.14286	1.09954	0.721617	1
1656D_12092_c0_g1_i1	334	1656C;1656D	5	2	5	2	2.43018	1.0314	3.62613	5.40062	1.85164	0.342857	-1.54432	0.534519	1
1656D_12092_c1_g1_i1	328	1656D	0	3	0	3	0	1.5946	1.38873	0	2.77746	-	-	0.428162	1
1656D_12093_c0_g1_i1	205	1656C;1656D	4	3	4	3	4.43763	3.50268	3.54898	4.32049	2.77746	0.642857	-0.63743	0.894145	1
1656D_12096_c0_g1_i1	1293	1656C;1656D	57643.9	24800.9	57644	24801	3235.32	1422.94	42612	62262.6	22961.3	0.368781	-1.43916	0.408744	1
1656D_12097_c0_g1_i1	1597	1656C;1656D	56	63	56	63	2.41376	2.78107	59.4068	60.4869	58.3267	0.964286	-0.0524674	0.978547	1
1656D_12097_c1_g1_i1	203	1656C	1	0	1	0	1.13056	0	0.540062	1.08012	0	0	-	0.940866	1
1656D_12098_c0_g1_i1	505	1656C;1656D	93	71	93	71	22.6065	17.4472	83.0924	100.451	65.7332	0.654378	-0.611804	0.54923	1
1656D_12099_c0_g1_i1	387	1656C;1656D	28	18	28	18	10.8185	7.24798	23.4541	30.2435	16.6648	0.55102	-0.859822	0.514971	1
1656D_1209_c0_g1_i1	229	1656C;1656D	2	5	2	5	1.79788	4.76938	3.39467	2.16025	4.6291	2.14286	1.09954	0.721617	1
1656D_12100_c0_g1_i1	277	1656C;1656D	2	5	2	5	1.30715	3.46262	3.39467	2.16025	4.6291	2.14286	1.09954	0.721617	1
1656D_12102_c0_g1_i1	240	1656C;1656D	2	5	2	5	1.65705	4.42394	3.39467	2.16025	4.6291	2.14286	1.09954	0.721617	1
1656D_12103_c0_g1_i1	2042	1656C;1656D	2371	2276	2371	2276	76.2858	75.1161	2334.07	2560.97	2107.17	0.822799	-0.281388	0.730022	1
1656D_12103_c1_g1_i1	443	1656C;1656D	4	11	4	11	1.22635	3.4625	7.25226	4.32049	10.184	2.35714	1.23704	0.505132	1
1656D_12104_c0_g1_i1	823	1656C;1656D	4824	3232	4824	3232	507.989	345.431	4101.38	5210.52	2992.25	0.574271	-0.800195	0.359106	1
1656D_12106_c0_g1_i1	215	1656C;1656D	12	5	12	5	12.1434	5.34126	8.79529	12.9615	4.6291	0.357143	-1.48543	0.376039	1
1656D_12107_c0_g1_i1	277	1656C;1656D	2	5	2	5	1.30715	3.46262	3.39467	2.16025	4.6291	2.14286	1.09954	0.721617	1
1656D_12107_c1_g1_i1	208	1656D	0	2	0	2	0	2.27607	0.92582	0	1.85164	-	-	0.653038	1
1656D_12108_c0_g1_i1	775	1656C;1656D	847	851	847	851	97.9407	99.7251	851.369	914.865	787.873	0.861191	-0.215595	0.783067	1
1656D_12109_c0_g1_i1	2308	1656C;1656D	529	617	529	617	14.7803	17.694	571.308	571.385	571.231	0.99973	-0.000389654	1	1
1656D_1210_c0_g1_i1	496	1656C;1656D	21	1	21	1	5.28205	0.25404	11.8042	22.6826	0.92582	0.0408163	-4.61471	0.0162553	0.634193
1656D_1210_c1_g1_i1	255	1656C;1656D	1	3	1	3	0.751318	2.39122	1.92879	1.08012	2.77746	2.57143	1.36257	0.808713	1
1656D_12110_c0_g1_i1	224	1656C;1656D	1	4	1	4	0.933159	3.95751	2.3917	1.08012	3.70328	3.42857	1.77761	0.612428	1
1656D_12110_c1_g1_i1	322	1656C;1656D	5	5	5	5	2.57549	2.72692	5.01486	5.40062	4.6291	0.857143	-0.222392	1	1
1656D_12112_c0_g2_i1	1999	1656C;1656D	90	207.566	90	208	2.96843	7.02164	144.891	97.2111	192.571	1.98095	0.986194	0.282692	1
1656D_12113_c0_g1_i1	1004	1656C;1656D	1284	1258	1284	1258	101.107	100.936	1275.78	1386.88	1164.68	0.839786	-0.251906	0.748789	1
1656D_12114_c0_g1_i1	1210	1656C;1656D	4545	1022	4545	1022	278.027	63.8625	2927.67	4909.16	946.188	0.192739	-2.37528	0.00655861	0.380353
1656D_12115_c0_g1_i1	249	1656C;1656D	4	2	4	2	3.13221	1.65951	3.08607	4.32049	1.85164	0.428571	-1.22239	0.688967	1
1656D_12116_c0_g1_i1	1134	1656C;1656D	3112	2536	3112	2536	207.446	172.55	2854.61	3361.34	2347.88	0.698494	-0.51768	0.533923	1
1656D_12117_c0_g1_i1	1006	1656C;1656D	24	23	24	23	1.88459	1.84034	23.6084	25.923	21.2939	0.821429	-0.283793	0.854184	1
1656D_12118_c0_g1_i1	2648	1656C;1656D	2805	2771	2805	2771	67.0867	68.0619	2797.6	3029.75	2565.45	0.846753	-0.239986	0.772351	1
1656D_12118_c1_g1_i1	1235	1656C;1656D	37	72	37	72	2.20369	4.3815	53.3118	39.9646	66.659	1.66795	0.738079	0.509684	1
1656D_1211_c0_g1_i1	321	1656C;1656D	7	3	7	3	3.62742	1.64347	5.16916	7.56086	2.77746	0.367347	-1.44478	0.484262	1
1656D_12120_c0_g1_i1	1035	1656C;1656D	157	177	157	177	11.8505	13.6195	166.725	169.579	163.87	0.966333	-0.0494076	0.962922	1
1656D_12122_c0_g1_i1	282	1656C;1656D	7	7	7	7	4.42346	4.71805	7.0208	7.56086	6.48074	0.857143	-0.222392	0.990747	1
1656D_12124_c0_g1_i1	233	1656C;1656D	4	1	4	1	3.48973	0.930016	2.62316	4.32049	0.92582	0.214286	-2.22239	0.452547	1
1656D_12128_c0_g1_i1	908	1656C;1656D	68	15	68	15	6.18212	1.38682	43.6678	73.4484	13.8873	0.189076	-2.40296	0.0447435	0.974521
1656D_12129_c0_g1_i1	796	1656C;1656D	7	42	7	42	0.776132	4.72212	23.2227	7.56086	38.8844	5.14286	2.36257	0.0836351	1
1656D_12129_c1_g1_i1	530	1656C;1656D	3	30	3	30	0.666768	6.7409	15.5075	3.24037	27.7746	8.57143	3.09954	0.0492958	1
1656D_1212_c0_g1_i1	298	1656C;1656D	3	7	3	7	1.73397	4.31307	4.86056	3.24037	6.48074	2	1	0.677318	1
1656D_12130_c0_g1_i1	227	1656C;1656D	7	1	7	1	6.39325	0.966069	4.24334	7.56086	0.92582	0.122449	-3.02975	0.193965	1
1656D_12131_c0_g1_i1	288	1656C;1656D	4	6	4	6	2.44301	3.90151	4.93771	4.32049	5.55492	1.28571	0.36257	0.968366	1
1656D_12132_c0_g1_i1	850	1656C;1656D	16	30	16	30	1.60427	3.05516	22.5283	17.282	27.7746	1.60714	0.684498	0.615936	1
1656D_12134_c0_g1_i1	675	1656C;1656D	9	13	9	13	1.30406	1.90376	10.8784	9.72111	12.0357	1.2381	0.308122	0.900225	1
1656D_12135_c0_g1_i1	230	1656C;1656D	4	3	4	3	3.56432	2.84614	3.54898	4.32049	2.77746	0.642857	-0.63743	0.894145	1
1656D_12136_c0_g1_i1	218	1656C;1656D	5	3	5	3	4.93947	3.10781	4.08904	5.40062	2.77746	0.514286	-0.959358	0.722412	1
1656D_12137_c0_g1_i1	835	1656C;1656D	23	45	23	45	2.36899	4.70628	33.2524	24.8428	41.6619	1.67702	0.745899	0.545551	1
1656D_12138_c0_g1_i1	1048	1656C;1656D	27	7	27	7	2.00317	0.529524	17.822	29.1633	6.48074	0.222222	-2.16993	0.125139	1
1656D_12139_c0_g1_i1	251	1656C;1656D	2	4	2	4	1.54516	3.27604	2.93176	2.16025	3.70328	1.71429	0.777608	0.88701	1
1656D_12140_c0_g1_i1	252	1656C;1656D	4	4	4	4	3.06528	3.25348	4.01189	4.32049	3.70328	0.857143	-0.222392	1	1
1656D_12140_c1_g1_i1	216	1656D	0	3	0	3	0	3.17264	1.38873	0	2.77746	-	-	0.428162	1
1656D_12141_c0_g1_i1	233	1656C;1656D	2	5	2	5	1.74487	4.65008	3.39467	2.16025	4.6291	2.14286	1.09954	0.721617	1
1656D_12142_c0_g1_i1	2827	1656C;1656D	238	255	238	255	5.29108	5.82341	246.577	257.069	236.084	0.918367	-0.122857	0.888141	1
1656D_12145_c0_g1_i1	400	1656C	8	0	8	0	2.92606	0	4.32049	8.64099	0	0	-	0.0552302	1
1656D_12145_c1_g1_i1	331	1656C	6	0	6	0	2.95414	0	3.24037	6.48074	0	0	-	0.0984225	1
1656D_12146_c0_g1_i1	309	1656C	3	0	3	0	1.64714	0	1.62019	3.24037	0	0	-	0.316445	1
1656D_12147_c0_g1_i1	287	1656C;1656D	2	8	2	8	1.23003	5.22805	4.7834	2.16025	7.40656	3.42857	1.77761	0.412	1
1656D_12147_c1_g1_i1	221	1656C;1656D	2	1	2	1	1.92348	1.01621	1.54303	2.16025	0.92582	0.428571	-1.22239	0.915332	1
1656D_12148_c0_g1_i1	555	1656C;1656D	2	9	2	9	0.408959	1.85663	5.24631	2.16025	8.33238	3.85714	1.94753	0.347706	1
1656D_12149_c0_g1_i1	243	1656C	8	0	8	0	6.50863	0	4.32049	8.64099	0	0	-	0.0552302	1
1656D_1214_c0_g1_i1	263	1656C;1656D	2	2	2	2	1.42403	1.5107	2.00594	2.16025	1.85164	0.857143	-0.222392	1	1
1656D_1214_c1_g1_i1	264	1656C;1656D	2	1	2	1	1.41284	0.749633	1.54303	2.16025	0.92582	0.428571	-1.22239	0.915332	1
1656D_12150_c0_g1_i1	667	1656C;1656D	16	29	16	29	2.36572	4.33061	22.0654	17.282	26.8488	1.55357	0.635589	0.645571	1
1656D_12151_c0_g1_i1	224	1656C;1656D	5.02686	1.01086	5	1	4.69087	1.00012	3.16322	5.40062	0.92582	0.171429	-2.54432	0.332471	1
1656D_12151_c1_g1_i1	216	1656C;1656D	6.28629	4.04563	6	4	6.30644	4.27845	5.09201	6.48074	3.70328	0.571429	-0.807355	0.744312	1
1656D_12152_c0_g1_i1	810	1656C;1656D	16	13	16	13	1.72656	1.42326	14.6588	17.282	12.0357	0.696429	-0.521953	0.746746	1
1656D_12152_c1_g1_i1	1032	1656C;1656D	35	29	35	29	2.65246	2.24034	32.3266	37.8043	26.8488	0.710204	-0.493694	0.697754	1
1656D_12153_c0_g1_i1	243	1656C;1656D	4	2	4	2	3.25431	1.73211	3.08607	4.32049	1.85164	0.428571	-1.22239	0.688967	1
1656D_12154_c0_g1_i1	400	1656C;1656D	9	12	9	12	3.29182	4.56123	10.4155	9.72111	11.1098	1.14286	0.192645	0.970234	1
1656D_12155_c0_g1_i1	202	1656C;1656D	9	5	9	5	10.2781	5.98665	7.17511	9.72111	4.6291	0.47619	-1.07039	0.566502	1
1656D_12157_c0_g1_i1	227	1656C;1656D	2	9	2	9	1.82664	8.69462	5.24631	2.16025	8.33238	3.85714	1.94753	0.347706	1
1656D_12158_c0_g1_i1	290	1656C;1656D	2	3	2	3	1.20637	1.92713	2.46885	2.16025	2.77746	1.28571	0.36257	1	1
1656D_12158_c1_g1_i1	315	1656C;1656D	1	3	1	3	0.532795	1.69679	1.92879	1.08012	2.77746	2.57143	1.36257	0.808713	1
1656D_12159_c0_g1_i1	652	1656C;1656D	14	14	14	14	2.15176	2.1712	14.0416	15.1217	12.9615	0.857143	-0.222392	0.927472	1
1656D_12160_c0_g1_i1	348	1656C;1656D	5	4	5	4	2.28293	1.9331	4.55195	5.40062	3.70328	0.685714	-0.544321	0.888737	1
1656D_12163_c0_g1_i1	859	1656C;1656D	28	38	28	38	2.76358	3.80987	32.7123	30.2435	35.1812	1.16327	0.21818	0.880491	1
1656D_12164_c0_g1_i1	247	1656D	0	4	0	4	0	3.36692	1.85164	0	3.70328	-	-	0.295121	1
1656D_12164_c1_g1_i1	367	1656D	0	4	0	4	0	1.76209	1.85164	0	3.70328	-	-	0.295121	1
1656D_12166_c0_g1_i1	249	1656C;1656D	3	5	3	5	2.34916	4.14878	3.93474	3.24037	4.6291	1.42857	0.514573	0.935572	1
1656D_12168_c0_g1_i1	267	1656C;1656D	4	4	4	4	2.77614	2.94315	4.01189	4.32049	3.70328	0.857143	-0.222392	1	1
1656D_12169_c0_g1_i1	621	1656C;1656D	28	34	28	34	4.68641	5.73383	30.8607	30.2435	31.4779	1.04082	0.0577155	0.992954	1
1656D_1216_c0_g1_i1	467	1656C;1656D	8	8	8	8	2.24282	2.27719	8.02377	8.64099	7.40656	0.857143	-0.222392	0.97638	1
1656D_12170_c0_g1_i1	312	1656C;1656D	4	2	4	2	2.16085	1.14559	3.08607	4.32049	1.85164	0.428571	-1.22239	0.688967	1
1656D_12171_c0_g1_i1	219	1656C;1656D	6	3	6	3	5.89258	3.08859	4.6291	6.48074	2.77746	0.428571	-1.22239	0.58886	1
1656D_12172_c0_g1_i1	260	1656C;1656D	4	4	4	4	2.90617	3.07982	4.01189	4.32049	3.70328	0.857143	-0.222392	1	1
1656D_12173_c0_g1_i1	280	1656C;1656D	2	6	2	6	1.28178	4.08639	3.85758	2.16025	5.55492	2.57143	1.36257	0.59295	1
1656D_12174_c0_g1_i1	371	1656C;1656D	5	2	5	2	2.0602	0.866075	3.62613	5.40062	1.85164	0.342857	-1.54432	0.534519	1
1656D_12174_c1_g1_i1	270	1656C;1656D	2	3	2	3	1.36352	2.16691	2.46885	2.16025	2.77746	1.28571	0.36257	1	1
1656D_12176_c0_g1_i1	1621	1656C;1656D	35.6411	91	36	91	1.5086	3.94528	61.567	38.8844	84.2496	2.16667	1.11548	0.30356	1
1656D_12176_c0_g2_i1	755	1656C	13.3589	0	13	0	1.61036	0	7.0208	14.0416	0	0	-	0.0179112	0.658309
1656D_12177_c0_g1_i1	471	1656C;1656D	4	14	4	14	1.10523	3.92297	8.64099	4.32049	12.9615	3	1.58496	0.355727	1
1656D_12178_c0_g1_i1	285	1656C;1656D	6	3	6	3	3.73183	1.98536	4.6291	6.48074	2.77746	0.428571	-1.22239	0.58886	1
1656D_12179_c0_g1_i1	212	1656C;1656D	5	5	5	5	5.1926	5.48761	5.01486	5.40062	4.6291	0.857143	-0.222392	1	1
1656D_1217_c0_g1_i1	203	1656C	5	0	5	0	5.6528	0	2.70031	5.40062	0	0	-	0.138223	1
1656D_12180_c0_g1_i1	1133	1656C;1656D	207	244	207	244	13.8149	16.6212	224.743	223.586	225.9	1.01035	0.014858	0.992171	1
1656D_12182_c0_g1_i1	553	1656C;1656D	7	11	7	11	1.44091	2.28496	8.87244	7.56086	10.184	1.34694	0.429684	0.854149	1
1656D_12184_c0_g1_i1	3400	1656C;1656D	472	229	472	229	8.56188	4.26961	360.916	509.818	212.013	0.41586	-1.26583	0.121645	1
1656D_12185_c0_g1_i1	490	1656C;1656D	12	6	12	6	3.0853	1.56063	9.2582	12.9615	5.55492	0.428571	-1.22239	0.464204	1
1656D_12186_c0_g1_i1	297	1656C;1656D	3	5	3	5	1.74228	3.08857	3.93474	3.24037	4.6291	1.42857	0.514573	0.935572	1
1656D_12187_c0_g1_i1	311	1656C;1656D	10	4	10	4	5.43361	2.30124	7.25226	10.8012	3.70328	0.342857	-1.54432	0.387358	1
1656D_12188_c0_g1_i1	397	1656C;1656D	11	2	11	2	4.07245	0.770587	6.8665	11.8814	1.85164	0.155844	-2.68182	0.154152	1
1656D_12190_c0_g1_i1	652	1656C;1656D	32	37	32	37	4.91832	5.73817	34.4096	34.564	34.2553	0.991071	-0.0129391	1	1
1656D_12191_c0_g1_i1	258	1656C;1656D	3.04535	2.18955	3	2	2.24507	1.70662	2.54601	3.24037	1.85164	0.571429	-0.807355	0.902082	1
1656D_12191_c1_g1_i1	305	1656C;1656D	4	4	4	4	2.23743	2.3766	4.01189	4.32049	3.70328	0.857143	-0.222392	1	1
1656D_12192_c0_g1_i1	236	1656C;1656D	4	1	4	1	3.42213	0.910739	2.62316	4.32049	0.92582	0.214286	-2.22239	0.452547	1
1656D_12193_c0_g1_i1	295	1656C;1656D	3	8	3	8	1.76137	4.99122	5.32347	3.24037	7.40656	2.28571	1.19265	0.580843	1
1656D_12194_c0_g1_i1	602	1656C;1656D	9	16	9	16	1.59129	2.85105	12.2671	9.72111	14.8131	1.52381	0.607683	0.720544	1
1656D_12195_c0_g1_i1	1749	1656C;1656D	229	333	229	333	8.84443	13.1803	277.823	247.348	308.298	1.24641	0.317782	0.704057	1
1656D_12196_c0_g1_i1	1000	1656C;1656D	28	31	28	31	2.21719	2.50109	29.4719	30.2435	28.7004	0.94898	-0.075551	0.98188	1
1656D_12197_c0_g1_i1	2124	1656C;1656D	427	551	427	551	13.1253	17.3769	485.67	461.213	510.127	1.10606	0.145424	0.856615	1
1656D_12198_c0_g1_i1	521	1656C;1656D	7	9	7	9	1.60497	2.08659	7.94662	7.56086	8.33238	1.10204	0.140178	1	1
1656D_12199_c0_g1_i1	233	1656D	0	2	0	2	0	1.86003	0.92582	0	1.85164	-	-	0.653038	1
1656D_12199_c1_g1_i1	321	1656C;1656D	1	3	1	3	0.518202	1.64347	1.92879	1.08012	2.77746	2.57143	1.36257	0.808713	1
1656D_1219_c0_g1_i1	246	1656C;1656D	7	1	7	1	5.57499	0.844986	4.24334	7.56086	0.92582	0.122449	-3.02975	0.193965	1
1656D_121_c0_g1_i1	464	1656C;1656D	16	23	16	23	4.53657	6.62667	19.2879	17.282	21.2939	1.23214	0.30117	0.857668	1
1656D_12200_c0_g1_i1	1031	1656C;1656D	46	22	46	22	3.49078	1.70183	35.0269	49.6857	20.368	0.409938	-1.28652	0.284915	1
1656D_12200_c1_g1_i1	600	1656C;1656D	26	7	26	7	4.6237	1.25464	17.282	28.0832	6.48074	0.230769	-2.11548	0.136635	1
1656D_12201_c0_g1_i1	316	1656C;1656D	8	7	8	7	4.24426	3.93845	7.56086	8.64099	6.48074	0.75	-0.415037	0.878186	1
1656D_12203_c0_g1_i1	717	1656C;1656D	13	12	13	12	1.70296	1.59115	12.5757	14.0416	11.1098	0.791209	-0.33787	0.867781	1
1656D_12204_c0_g1_i1	300	1656C;1656D	1	2	1	2	0.572015	1.22055	1.46588	1.08012	1.85164	1.71429	0.777608	1	1
1656D_12204_c1_g1_i1	310	1656C	3	0	3	0	1.63775	0	1.62019	3.24037	0	0	-	0.316445	1
1656D_12205_c0_g1_i1	1368	1656C;1656D	53	53	53	53	2.76832	2.83148	53.1575	57.2465	49.0685	0.857143	-0.222392	0.854978	1
1656D_12208_c0_g1_i1	216	1656C;1656D	5	6	5	6	5.01603	6.34529	5.47777	5.40062	5.55492	1.02857	0.040642	1	1
1656D_1220_c0_g2_i1	230	1656C;1656D	1	4	1	4	0.891081	3.79485	2.3917	1.08012	3.70328	3.42857	1.77761	0.612428	1
1656D_12210_c0_g1_i1	369	1656C;1656D	10	21	10	21	4.15318	9.18257	15.1217	10.8012	19.4422	1.8	0.847997	0.571183	1
1656D_12211_c0_g1_i1	208	1656C;1656D	3	4	3	4	3.23608	4.55213	3.47183	3.24037	3.70328	1.14286	0.192645	1	1
1656D_12212_c0_g1_i1	291	1656C;1656D	1	10	1	10	0.599969	6.38795	5.16916	1.08012	9.2582	8.57143	3.09954	0.165873	1
1656D_12213_c0_g1_i1	294	1656C;1656D	4	9	4	9	2.36378	5.65356	6.32644	4.32049	8.33238	1.92857	0.947533	0.648739	1
1656D_12215_c0_g1_i1	919	1656C;1656D	31	13	31	13	2.76928	1.18127	22.7597	33.4838	12.0357	0.359447	-1.47615	0.261704	1
1656D_12216_c0_g1_i1	251	1656C;1656D	15	9	15	9	11.5887	7.37108	12.2671	16.2019	8.33238	0.514286	-0.959358	0.538716	1
1656D_12217_c0_g1_i1	255	1656C;1656D	6	4	6	4	4.50791	3.1883	5.09201	6.48074	3.70328	0.571429	-0.807355	0.744312	1
1656D_12217_c1_g1_i1	435	1656C;1656D	5	5	5	5	1.58235	1.62897	5.01486	5.40062	4.6291	0.857143	-0.222392	1	1
1656D_12218_c0_g1_i1	224	1656C;1656D	2	3	2	3	1.86632	2.96813	2.46885	2.16025	2.77746	1.28571	0.36257	1	1
1656D_12219_c0_g1_i1	248	1656D	0	2	0	2	0	1.6693	0.92582	0	1.85164	-	-	0.653038	1
1656D_12219_c1_g1_i1	215	1656C;1656D	2	2	2	2	2.0239	2.13651	2.00594	2.16025	1.85164	0.857143	-0.222392	1	1
1656D_12220_c0_g1_i1	225	1656C;1656D	2	5	2	5	1.8531	4.91427	3.39467	2.16025	4.6291	2.14286	1.09954	0.721617	1
1656D_12221_c0_g1_i1	311	1656C;1656D	5	6	5	6	2.71681	3.45186	5.47777	5.40062	5.55492	1.02857	0.040642	1	1
1656D_12222_c0_g1_i1	258	1656C;1656D	8	7	8	7	5.8977	5.4561	7.56086	8.64099	6.48074	0.75	-0.415037	0.878186	1
1656D_12223_c0_g1_i1	290	1656C;1656D	5	4	5	4	3.01592	2.56951	4.55195	5.40062	3.70328	0.685714	-0.544321	0.888737	1
1656D_12225_c0_g1_i1	205	1656C;1656D	5	3	5	3	5.54704	3.50268	4.08904	5.40062	2.77746	0.514286	-0.959358	0.722412	1
1656D_12226_c0_g1_i1	1906	1656C;1656D	42	69	42	69	1.46484	2.46756	54.6234	45.3652	63.8816	1.40816	0.493815	0.66215	1
1656D_12226_c1_g1_i1	281	1656D	0	2	0	2	0	1.35554	0.92582	0	1.85164	-	-	0.653038	1
1656D_12227_c0_g1_i1	213	1656C;1656D	3	4	3	4	3.09854	4.34497	3.47183	3.24037	3.70328	1.14286	0.192645	1	1
1656D_12228_c0_g1_i1	438	1656C;1656D	10	13	10	13	3.12814	4.17894	11.4184	10.8012	12.0357	1.11429	0.156119	0.983809	1
1656D_12229_c0_g1_i1	302	1656C;1656D	4	7	4	7	2.26702	4.23144	5.40062	4.32049	6.48074	1.5	0.584963	0.844754	1
1656D_1222_c0_g2_i1	239	1656C;1656D	8	2	8	2	6.69132	1.78284	5.24631	8.64099	1.85164	0.214286	-2.22239	0.2727	1
1656D_12230_c0_g1_i1	280	1656C;1656D	3	2	3	2	1.92267	1.36213	2.54601	3.24037	1.85164	0.571429	-0.807355	0.902082	1
1656D_12230_c1_g1_i1	442	1656C;1656D	3	7	3	7	0.923018	2.21226	4.86056	3.24037	6.48074	2	1	0.677318	1
1656D_12231_c0_g1_i1	1266	1656C;1656D	225	242	225	242	12.9765	14.2643	233.538	243.028	224.048	0.921905	-0.11731	0.894409	1
1656D_12232_c0_g1_i1	664	1656C;1656D	36	44	36	44	5.36446	6.61755	39.8103	38.8844	40.7361	1.04762	0.0671142	0.978373	1
1656D_12233_c0_g1_i1	330	1656C;1656D	1	8	1	8	0.494499	4.20774	4.24334	1.08012	7.40656	6.85714	2.77761	0.242454	1
1656D_12234_c0_g1_i1	727	1656C;1656D	8	54	8	54	1.02472	7.00067	29.3176	8.64099	49.9943	5.78571	2.5325	0.0536073	1
1656D_12235_c0_g1_i1	766	1656C;1656D	52	109	52	109	6.12578	13.0077	78.5404	56.1664	100.914	1.7967	0.845352	0.412536	1
1656D_12236_c0_g1_i1	1171	1656C;1656D	86	65	86	65	5.49285	4.23923	76.5345	92.8906	60.1783	0.647841	-0.626289	0.546543	1
1656D_12237_c0_g1_i1	255	1656C;1656D	5	6	5	6	3.75659	4.78245	5.47777	5.40062	5.55492	1.02857	0.040642	1	1
1656D_12243_c0_g1_i1	236	1656C	11	0	11	0	9.41085	0	5.94068	11.8814	0	0	-	0.0269418	0.789742
1656D_12244_c0_g1_i1	620	1656C	31	0	31	0	5.2029	0	16.7419	33.4838	0	0	-	0.00127739	0.129901
1656D_12245_c0_g1_i1	276	1656C;1656D	2	5	2	5	1.31491	3.48704	3.39467	2.16025	4.6291	2.14286	1.09954	0.721617	1
1656D_12246_c0_g1_i1	248	1656C;1656D	3	5	3	5	2.36042	4.17326	3.93474	3.24037	4.6291	1.42857	0.514573	0.935572	1
1656D_12249_c0_g1_i1	311	1656C;1656D	5	4	5	4	2.71681	2.30124	4.55195	5.40062	3.70328	0.685714	-0.544321	0.888737	1
1656D_1224_c0_g1_i1	207	1656C;1656D	10	8	10	8	10.8587	9.19091	9.1039	10.8012	7.40656	0.685714	-0.544321	0.786202	1
1656D_12252_c0_g1_i1	250	1656C;1656D	5	2	5	2	3.89205	1.64833	3.62613	5.40062	1.85164	0.342857	-1.54432	0.534519	1
1656D_12253_c0_g1_i1	228	1656C;1656D	9	1	9	1	8.15356	0.959823	5.32347	9.72111	0.92582	0.0952381	-3.39232	0.12172	1
1656D_12254_c0_g1_i1	237	1656C;1656D	5	3	5	3	4.24929	2.7122	4.08904	5.40062	2.77746	0.514286	-0.959358	0.722412	1
1656D_12256_c0_g1_i1	782	1656C;1656D	35	41	35	41	3.98994	4.73784	37.8815	37.8043	37.9586	1.00408	0.00587657	1	1
1656D_12256_c1_g1_i1	226	1656C;1656D	1	5	1	5	0.918738	4.86992	2.85461	1.08012	4.6291	4.28571	2.09954	0.472704	1
1656D_12257_c0_g1_i1	1344	1656C;1656D	111	119	111	119	5.92942	6.5007	115.033	119.894	110.173	0.918919	-0.121991	0.906591	1
1656D_12258_c0_g1_i1	362	1656C	7	0	7	0	2.99758	0	3.78043	7.56086	0	0	-	0.0727312	1
1656D_1225_c0_g1_i1	219	1656C;1656D	8	2	8	2	7.85677	2.05906	5.24631	8.64099	1.85164	0.214286	-2.22239	0.2727	1
1656D_12260_c0_g1_i1	284	1656C;1656D	2	3	2	3	1.25043	1.99549	2.46885	2.16025	2.77746	1.28571	0.36257	1	1
1656D_12260_c1_g1_i1	214	1656C	1	0	1	0	1.02244	0	0.540062	1.08012	0	0	-	0.940866	1
1656D_12261_c0_g1_i1	283	1656C	7	0	7	0	4.40028	0	3.78043	7.56086	0	0	-	0.0727312	1
1656D_12263_c0_g1_i1	272	1656C;1656D	6	2	6	2	4.04236	1.43234	4.16619	6.48074	1.85164	0.285714	-1.80735	0.421356	1
1656D_12264_c0_g1_i1	1342	1656C;1656D	49	22	49	22	2.62245	1.20407	36.647	52.926	20.368	0.38484	-1.37767	0.248629	1
1656D_12265_c0_g1_i1	1443	1656C;1656D	39	55	39	55	1.90492	2.74905	46.5225	42.1248	50.9201	1.20879	0.273565	0.824833	1
1656D_12266_c0_g1_i1	239	1656C;1656D	3	4	3	4	2.50925	3.56568	3.47183	3.24037	3.70328	1.14286	0.192645	1	1
1656D_12267_c0_g1_i1	281	1656C;1656D	10	2	10	2	6.36371	1.35554	6.32644	10.8012	1.85164	0.171429	-2.54432	0.184621	1
1656D_12268_c0_g1_i1	1058	1656C;1656D	152	203	152	203	11.1309	15.1592	176.06	164.179	187.941	1.14474	0.195016	0.830456	1
1656D_12269_c0_g1_i1	1008	1656C;1656D	192	221	192	221	15.0349	17.6348	205.995	207.384	204.606	0.986607	-0.0194524	0.988276	1
1656D_12270_c0_g1_i1	645	1656C;1656D	9	18	9	18	1.40957	2.84231	13.1929	9.72111	16.6648	1.71429	0.777608	0.62276	1
1656D_12270_c1_g1_i1	223	1656C;1656D	3	2	3	2	2.82607	2.00101	2.54601	3.24037	1.85164	0.571429	-0.807355	0.902082	1
1656D_12272_c0_g1_i1	345	1656C;1656D	6	7	6	7	2.77628	3.42712	6.48074	6.48074	6.48074	1	0	1	1
1656D_12273_c0_g2_i1	1048	1656C;1656D	22	55	22	55	1.63222	4.16055	37.3414	23.7627	50.9201	2.14286	1.09954	0.35717	1
1656D_12273_c1_g1_i1	482	1656C;1656D	9	20	9	20	2.38208	5.36064	14.1188	9.72111	18.5164	1.90476	0.929611	0.539632	1
1656D_12274_c0_g1_i1	234	1656C;1656D	3	4	3	4	2.59773	3.68773	3.47183	3.24037	3.70328	1.14286	0.192645	1	1
1656D_12275_c0_g1_i1	1279	1656C;1656D	1	360	1	360	0.0569178	20.9439	167.188	1.08012	333.295	308.571	8.26946	6.21143e-09	1.01628e-05
1656D_12276_c0_g1_i1	273	1656C;1656D	4	5	4	5	2.67912	3.5564	4.4748	4.32049	4.6291	1.07143	0.0995357	1	1
1656D_12278_c0_g1_i1	1000	1656C;1656D	56	71	56	71	4.43437	5.7283	63.1101	60.4869	65.7332	1.08673	0.12	0.92578	1
1656D_12279_c0_g1_i1	278	1656C;1656D	2	4	2	4	1.29747	2.74881	2.93176	2.16025	3.70328	1.71429	0.777608	0.88701	1
1656D_1227_c0_g1_i1	207	1656D	0	4	0	4	0	4.59546	1.85164	0	3.70328	-	-	0.295121	1
1656D_12280_c0_g1_i1	202	1656C;1656D	6	7	6	7	6.85204	8.38131	6.48074	6.48074	6.48074	1	0	1	1
1656D_12280_c1_g1_i1	1425	1656C;1656D	3244	5178	3244	5178	160.956	262.875	4148.91	3503.92	4793.9	1.36815	0.452229	0.603612	1
1656D_12281_c0_g1_i1	2194	1656C;1656D	440	75	440	75	13.0285	2.27883	272.345	475.254	69.4365	0.146104	-2.77493	0.00172375	0.159212
1656D_12282_c0_g1_i1	262	1656C;1656D	5	1	5	1	3.58548	0.760844	3.16322	5.40062	0.92582	0.171429	-2.54432	0.332471	1
1656D_12283_c0_g1_i1	1986	1656C;1656D	1275	1034	1275	1034	42.3745	35.245	1167.23	1377.16	957.298	0.695126	-0.524653	0.50361	1
1656D_12284_c0_g1_i1	305	1656C;1656D	4	7	4	7	2.23743	4.15905	5.40062	4.32049	6.48074	1.5	0.584963	0.844754	1
1656D_12285_c0_g1_i1	229	1656C;1656D	3	4	3	4	2.69683	3.81551	3.47183	3.24037	3.70328	1.14286	0.192645	1	1
1656D_12285_c1_g1_i1	209	1656C;1656D	3	1	3	1	3.20118	1.12884	2.0831	3.24037	0.92582	0.285714	-1.80735	0.635182	1
1656D_12286_c0_g1_i1	898	1656C;1656D	44	17	44	17	4.06565	1.59711	31.6322	47.5254	15.7389	0.331169	-1.59436	0.195818	1
1656D_12287_c0_g1_i1	906	1656C;1656D	112	122	112	122	10.2152	11.3155	116.962	120.974	112.95	0.933673	-0.09901	0.925739	1
1656D_12288_c0_g1_i1	209	1656C;1656D	5	2	5	2	5.33531	2.25768	3.62613	5.40062	1.85164	0.342857	-1.54432	0.534519	1
1656D_12289_c0_g1_i1	625	1656C;1656D	57	36	57	36	9.43501	6.00275	47.4483	61.567	33.3295	0.541353	-0.885357	0.436404	1
1656D_12290_c0_g1_i1	396	1656C;1656D	5	7	5	7	1.85968	2.70931	5.94068	5.40062	6.48074	1.2	0.263034	0.9921	1
1656D_12291_c0_g1_i1	832	1656C;1656D	249	199	249	199	25.788	20.9229	226.594	268.951	184.238	0.685026	-0.54577	0.522492	1
1656D_12293_c0_g1_i1	1710	1656C;1656D	2840.99	3557	2841	3557	112.731	144.624	3180.89	3068.63	3293.14	1.07316	0.10187	0.903972	1
1656D_12295_c0_g1_i1	924	1656C;1656D	695	831	695	831	61.5982	74.9255	760.021	750.686	769.357	1.02487	0.0354431	0.965702	1
1656D_12295_c1_g1_i1	230	1656D	0	2	0	2	0	1.89742	0.92582	0	1.85164	-	-	0.653038	1
1656D_12296_c0_g1_i1	698	1656C;1656D	5	14	5	14	0.684834	1.93955	9.18105	5.40062	12.9615	2.4	1.26303	0.456933	1
1656D_12296_c1_g1_i1	208	1656C;1656D	7	4	7	4	7.55084	4.55213	5.63207	7.56086	3.70328	0.489796	-1.02975	0.626625	1
1656D_12297_c0_g1_i1	824	1656C;1656D	13	22	13	22	1.36641	2.34701	17.2048	14.0416	20.368	1.45055	0.536599	0.725486	1
1656D_12298_c0_g1_i1	2467	1656C;1656D	71	71	71	71	1.83907	1.88816	71.211	76.6888	65.7332	0.857143	-0.222392	0.842301	1
1656D_12299_c0_g1_i1	593	1656C;1656D	9	12	9	12	1.63407	2.19618	10.4155	9.72111	11.1098	1.14286	0.192645	0.970234	1
1656D_1229_c0_g1_i1	326	1656C;1656D	6	6	6	6	3.02671	3.21773	6.01783	6.48074	5.55492	0.857143	-0.222392	1	1
1656D_12300_c0_g1_i1	420	1656C;1656D	4	6	4	6	1.34707	2.0813	4.93771	4.32049	5.55492	1.28571	0.36257	0.968366	1
1656D_12301_c0_g1_i1	228	1656C;1656D	4	3	4	3	3.6238	2.87947	3.54898	4.32049	2.77746	0.642857	-0.63743	0.894145	1
1656D_12302_c0_g1_i1	251	1656C;1656D	2	9	2	9	1.54516	7.37108	5.24631	2.16025	8.33238	3.85714	1.94753	0.347706	1
1656D_12303_c0_g1_i1	766	1656C;1656D	63	85	63	85	7.42161	10.1436	73.3712	68.0478	78.6947	1.15646	0.209719	0.85129	1
1656D_12304_c0_g1_i1	443	1656C;1656D	4	5	4	5	1.22635	1.57386	4.4748	4.32049	4.6291	1.07143	0.0995357	1	1
1656D_12304_c1_g1_i1	228	1656C;1656D	1	2	1	2	0.905951	1.91965	1.46588	1.08012	1.85164	1.71429	0.777608	1	1
1656D_12305_c0_g1_i1	210	1656C	2	0	2	0	2.11815	0	1.08012	2.16025	0	0	-	0.522231	1
1656D_12305_c1_g1_i1	314	1656C;1656D	2	1	2	1	1.06962	0.568857	1.54303	2.16025	0.92582	0.428571	-1.22239	0.915332	1
1656D_12306_c0_g1_i1	622	1656C;1656D	9	39	9	39	1.5022	6.55803	22.914	9.72111	36.107	3.71429	1.89308	0.157708	1
1656D_1230_c0_g1_i1	295	1656C;1656D	3	4	3	4	1.76137	2.49561	3.47183	3.24037	3.70328	1.14286	0.192645	1	1
1656D_12310_c0_g1_i1	379	1656C;1656D	7	7	7	7	2.79412	2.92494	7.0208	7.56086	6.48074	0.857143	-0.222392	0.990747	1
1656D_12313_c0_g1_i1	1538	1656C;1656D	879	985	879	985	39.674	45.519	930.681	949.429	911.933	0.960507	-0.0581319	0.941873	1
1656D_12314_c0_g1_i1	1564	1656C;1656D	40016	11124	40016	11124	1769.37	503.665	26760.5	43222.2	10298.8	0.238276	-2.06929	0.150679	1
1656D_12315_c0_g1_i1	595	1656C;1656D	22	11	22	11	3.96968	2.00078	16.9734	23.7627	10.184	0.428571	-1.22239	0.38462	1
1656D_12316_c0_g1_i1	1853	1656C;1656D	1723	2344	1723	2344	62.1267	86.6476	2015.59	1861.05	2170.12	1.16607	0.221657	0.783549	1
1656D_12318_c0_g1_i1	262	1656C;1656D	5	6	5	6	3.58548	4.56507	5.47777	5.40062	5.55492	1.02857	0.040642	1	1
1656D_1231_c0_g1_i1	240	1656C;1656D	3	4	3	4	2.48558	3.53915	3.47183	3.24037	3.70328	1.14286	0.192645	1	1
1656D_12320_c0_g1_i1	319	1656C;1656D	5	6	5	6	2.61348	3.32472	5.47777	5.40062	5.55492	1.02857	0.040642	1	1
1656D_12321_c0_g1_i1	266	1656C;1656D	9	17	9	17	6.28046	12.5969	12.73	9.72111	15.7389	1.61905	0.695145	0.669667	1
1656D_12323_c0_g1_i1	801	1656C;1656D	2869	1113	2869	1113	315.011	123.939	2064.66	3098.87	1030.44	0.33252	-1.58849	0.0539899	1
1656D_12324_c0_g1_i1	926	1656C	135	0	135	0	11.9277	0	72.9083	145.817	0	0	-	6.31676e-07	0.000405403
1656D_12325_c0_g1_i1	750	1656C;1656D	8	15	8	15	0.974769	1.85021	11.2641	8.64099	13.8873	1.60714	0.684498	0.689928	1
1656D_12325_c1_g1_i1	203	1656D	0	4	0	4	0	4.7497	1.85164	0	3.70328	-	-	0.295121	1
1656D_12326_c0_g1_i1	1549	1656C;1656D	24	385	24	385	1.07381	17.6376	191.182	25.923	356.441	13.75	3.78136	0.00011905	0.0235093
1656D_12327_c0_g1_i1	220	1656C;1656D	3	4	3	4	2.91369	4.08783	3.47183	3.24037	3.70328	1.14286	0.192645	1	1
1656D_12327_c1_g1_i1	256	1656D	0	3	0	3	0	2.37416	1.38873	0	2.77746	-	-	0.428162	1
1656D_12329_c0_g1_i1	2667	1656C;1656D	960	1822	960	1822	22.7769	44.3963	1361.88	1036.92	1686.84	1.62679	0.702024	0.37427	1
1656D_1232_c0_g1_i1	3291	1656C;1656D	70	133	70	133	1.31584	2.56946	99.3714	75.6086	123.134	1.62857	0.703607	0.475026	1
1656D_1232_c1_g1_i1	204	1656C	1	0	1	0	1.12161	0	0.540062	1.08012	0	0	-	0.940866	1
1656D_12330_c0_g1_i1	649	1656C;1656D	38	48	38	48	5.8874	7.50184	42.742	41.0447	44.4394	1.08271	0.114643	0.942106	1
1656D_12331_c0_g1_i1	262	1656C;1656D	3	6	3	6	2.15129	4.56507	4.39765	3.24037	5.55492	1.71429	0.777608	0.793982	1
1656D_12332_c0_g1_i1	702	1656C;1656D	39	51	39	51	5.29196	6.99956	44.6708	42.1248	47.2168	1.12088	0.164631	0.904564	1
1656D_12333_c0_g1_i1	2133	1656C;1656D	1198	1106	1198	1106	36.6451	34.7106	1158.97	1293.99	1023.96	0.791319	-0.337669	0.666689	1
1656D_12334_c0_g1_i1	1851	1656C;1656D	145	228	145	228	5.23499	8.4389	183.852	156.618	211.087	1.34778	0.430589	0.626239	1
1656D_12335_c0_g1_i1	2193	1656C;1656D	635	911	635	911	18.8124	27.6946	764.65	685.878	843.422	1.2297	0.298302	0.703312	1
1656D_12336_c0_g1_i1	1987	1656C;1656D	748	1033	748	1033	24.8451	35.1903	882.152	807.932	956.372	1.18373	0.243338	0.756016	1
1656D_12337_c0_g1_i1	248	1656C;1656D	5	3	5	3	3.93403	2.50395	4.08904	5.40062	2.77746	0.514286	-0.959358	0.722412	1
1656D_12337_c1_g1_i1	398	1656C;1656D	8	4	8	4	2.95216	1.53388	6.17213	8.64099	3.70328	0.428571	-1.22239	0.530668	1
1656D_12338_c0_g1_i1	2048	1656C;1656D	413	202	413	202	13.2428	6.64411	316.553	446.091	187.016	0.419232	-1.25418	0.12938	1
1656D_12339_c0_g1_i1	502	1656C;1656D	24	10	24	10	5.90029	2.48371	17.5906	25.923	9.2582	0.357143	-1.48543	0.285931	1
1656D_12340_c0_g1_i1	247	1656C;1656D	2	9	2	9	1.58038	7.57556	5.24631	2.16025	8.33238	3.85714	1.94753	0.347706	1
1656D_12340_c1_g1_i1	1334	1656C;1656D	2052	326	2052	326	110.661	17.9774	1259.12	2216.41	301.817	0.136174	-2.87648	0.000614024	0.0783039
1656D_12341_c0_g1_i1	294	1656C;1656D	10	2	10	2	5.90944	1.25635	6.32644	10.8012	1.85164	0.171429	-2.54432	0.184621	1
1656D_12342_c0_g1_i1	240	1656C;1656D	2	5	2	5	1.65705	4.42394	3.39467	2.16025	4.6291	2.14286	1.09954	0.721617	1
1656D_12343_c0_g1_i1	228	1656C;1656D	7	3	7	3	6.34166	2.87947	5.16916	7.56086	2.77746	0.367347	-1.44478	0.484262	1
1656D_12344_c0_g1_i1	265	1656C;1656D	12	2	12	2	8.41809	1.49013	7.40656	12.9615	1.85164	0.142857	-2.80735	0.129772	1
1656D_12346_c0_g1_i1	467	1656C;1656D	6	8	6	8	1.68212	2.27719	6.94365	6.48074	7.40656	1.14286	0.192645	1	1
1656D_12347_c0_g1_i1	1009	1656C;1656D	420.621	317.064	421	317	32.8919	25.2655	374.108	454.732	293.485	0.645402	-0.63173	0.434422	1
1656D_12347_c0_g2_i1	1051	1656C;1656D	34.3792	73.9362	34	74	2.54064	5.57128	52.6174	36.7242	68.5107	1.86555	0.899598	0.421301	1
1656D_12348_c0_g1_i1	743	1656C;1656D	20	32	20	32	2.47355	4.00616	25.6144	21.6025	29.6262	1.37143	0.455679	0.740485	1
1656D_12349_c0_g1_i1	962	1656C;1656D	15.496	33.2154	15	33	1.29612	2.82829	23.377	16.2019	30.5521	1.88571	0.915111	0.490272	1
1656D_12349_c0_g2_i1	847	1656C;1656D	141.504	145.785	142	146	14.2627	14.9249	144.274	153.378	135.17	0.881288	-0.182315	0.847871	1
1656D_12351_c0_g1_i1	587	1656C;1656D	5	12	5	12	0.924731	2.23523	8.25523	5.40062	11.1098	2.05714	1.04064	0.563909	1
[truncated: 113,523 more rows]

## Sheet: Differential Expression
Transcript Ids	Transcript Length	Transcript Library	1656C Estimated Read Count (Control)	1656D Estimated Read Count (Drought)	Rounded Count 1656C	Rounded Count 1656D	1656C TPM (Control)	1656D TPM (Drought)	baseMean	baseMean_1656C	baseMean_1656D	foldChange [1656C vs. 1656D]	log2FoldChange [1656C vs. 1656D]	pval [1656C vs. 1656D]	padj [1656C vs. 1656D]	NRDB Accession	NRDB Description	Organism(NRDB)	UniPort Accession	Protein Names	Gene Names	Organism	Gene Names (Synonym )	Gene Names (Primary )	EC Number	Pathway	Gene Ontology (GO)	Gene Ontology IDs	Gene Ontology (biological process)	Gene Ontology (cellular component)	Gene Ontology (molecular function)	Subcellular Location [CC]	KEGG
1656D_10034_c0_g1_i1	949	1656C;1656D	67	11	67	11	5.71404	0.954811	41.2761	72.3683	10.184	0.140725	-2.82905	0.0222033	0.726803	-	-	-	-	-	-	-	-	-	-	-	-	-	-	-	-	-	-
1656D_10133_c0_g1_i1	350	1656C;1656D	2	27	2	27	0.904439	12.9203	13.5787	2.16025	24.9971	11.5714	3.5325	0.0372168	0.920048	-	-	-	-	-	-	-	-	-	-	-	-	-	-	-	-	-	-
1656D_10174_c0_g1_i1	797	1656C;1656D	84.5543	656.224	85	656	9.35667	73.6379	349.574	91.8105	607.338	6.61513	2.72577	0.00159535	0.151402	XP_010930191.2	PREDICTED: uncharacterized protein LOC105051437	Elaeis guineensis	-	-	-	-	-	-	-	-	-	-	-	-	-	-	-
1656D_10178_c0_g1_i1	648	1656C;1656D	79	7	79	7	12.2733	1.09696	45.9052	85.3298	6.48074	0.0759494	-3.71882	0.00376862	0.267584	XP_020257205.1	zinc finger protein 7-like	Asparagus officinalis	-	-	-	-	-	-	-	-	-	-	-	-	-	-	-
1656D_10409_c0_g1_i1	569	1656C;1656D	1	29	1	29	0.195566	5.71544	13.9645	1.08012	26.8488	24.8571	4.63559	0.0139711	0.589041	-	-	-	-	-	-	-	-	-	-	-	-	-	-	-	-	-	-
1656D_10410_c0_g1_i1	1074	1656C;1656D	2	75	2	75	0.143482	5.488	35.7984	2.16025	69.4365	32.1429	5.00643	0.00107438	0.116096	XP_020244806.1	aquaporin NIP1-1-like	Asparagus officinalis	-	-	-	-	-	-	-	-	-	-	-	-	-	-	-
1656D_10420_c0_g1_i1	1043	1656C;1656D	55	747	55	747	4.10752	56.8775	375.497	59.4068	691.588	11.6416	3.54121	7.28366e-05	0.0163369	XP_020270243.1	methylmalonyl-CoA epimerase, mitochondrial-like	Asparagus officinalis	-	-	-	-	-	-	-	-	-	-	-	-	-	-	-
1656D_10439_c0_g1_i1	1063	1656C;1656D	699.363	3042.3	699	3042	50.8841	225.737	1785.68	755.006	2816.34	3.73023	1.89926	0.0211232	0.717393	BAK22528.1	tau glutathione S-transferase	Allium cepa	F2ZC01	Tau glutathione S-transferase	-	Allium cepa (Onion)	-	-	-	-	transferase activity [GO:0016740]	GO:0016740	-	-	transferase activity [GO:0016740]	-	-
1656D_10465_c0_g1_i1	400	1656C;1656D	1	28	1	28	0.365758	10.6429	13.5015	1.08012	25.923	24	4.58496	0.0154896	0.61638	-	-	-	-	-	-	-	-	-	-	-	-	-	-	-	-	-	-
1656D_1053_c0_g1_i1	575	1656C;1656D	24	3	24	3	4.60358	0.580348	14.3502	25.923	2.77746	0.107143	-3.22239	0.0428513	0.946152	-	-	-	-	-	-	-	-	-	-	-	-	-	-	-	-	-	-
1656D_10542_c0_g1_i1	272	1656C;1656D	1	18	1	18	0.673727	12.8911	8.87244	1.08012	16.6648	15.4286	3.94753	0.0494701	1	-	-	-	-	-	-	-	-	-	-	-	-	-	-	-	-	-	-
1656D_10630_c0_g1_i1	1804	1656C;1656D	229	55	229	55	8.5238	2.09843	149.134	247.348	50.9201	0.205864	-2.28024	0.0158937	0.62409	-	-	-	-	-	-	-	-	-	-	-	-	-	-	-	-	-	-
1656D_10661_c0_g1_i1	373	1656C;1656D	36	1	36	1	14.7231	0.429114	19.9051	38.8844	0.92582	0.0238095	-5.39232	0.00281603	0.223737	XP_008796987.1	PREDICTED: glycine-rich protein 2-like	Phoenix dactylifera	A0A2H3YDP4	glycine-rich protein 2-like	LOC103712286	Phoenix dactylifera (Date palm)	-	LOC103712286	-	-	-	-	-	-	-	-	pda:103712286;
1656D_10847_c0_g1_i1	524	1656C;1656D	49	1	49	1	11.1259	0.229385	26.9259	52.926	0.92582	0.0174927	-5.8371	0.000833546	0.0971674	-	-	-	-	-	-	-	-	-	-	-	-	-	-	-	-	-	-
1656D_10853_c0_g1_i1	378	1656C;1656D	29	3	29	3	11.6221	1.25876	17.0505	31.3236	2.77746	0.08867	-3.49541	0.0250622	0.779547	-	-	-	-	-	-	-	-	-	-	-	-	-	-	-	-	-	-
1656D_11314_c0_g1_i1	854	1656C;1656D	1	202	1	202	0.0995695	20.4284	94.0479	1.08012	187.016	173.143	7.43582	1.00178e-06	0.000578636	-	-	-	-	-	-	-	-	-	-	-	-	-	-	-	-	-	-
1656D_11525_c0_g1_i1	354	1656C;1656D	18	1	18	1	7.9855	0.468989	10.184	19.4422	0.92582	0.047619	-4.39232	0.0249422	0.777278	-	-	-	-	-	-	-	-	-	-	-	-	-	-	-	-	-	-
1656D_1156_c0_g1_i1	608	1656C;1656D	92	14	92	14	15.9873	2.45064	56.1664	99.3714	12.9615	0.130435	-2.9386	0.0123746	0.546446	-	-	-	-	-	-	-	-	-	-	-	-	-	-	-	-	-	-
1656D_11571_c0_g1_i1	1175	1656C;1656D	3	46	3	46	0.190748	2.98668	22.914	3.24037	42.5877	13.1429	3.71621	0.0138882	0.588337	XP_020240778.1	transcription factor MYB39-like	Asparagus officinalis	-	-	-	-	-	-	-	-	-	-	-	-	-	-	-
1656D_1161_c0_g1_i1	1917	1656C;1656D	1672	508	1672	508	57.9209	18.045	1138.14	1805.97	470.317	0.260424	-1.94107	0.0162957	0.63491	XP_008805608.1	PREDICTED: glucan endo-1,3-beta-glucosidase 10-like	Phoenix dactylifera	A0A2H3YZ08	glucan endo-1,3-beta-glucosidase 10-like	LOC103718521	Phoenix dactylifera (Date palm)	-	LOC103718521	-	-	hydrolase activity, hydrolyzing O-glycosyl compounds [GO:0004553]; carbohydrate metabolic process [GO:0005975]	GO:0004553; GO:0005975	carbohydrate metabolic process [GO:0005975]	-	hydrolase activity, hydrolyzing O-glycosyl compounds [GO:0004553]	-	pda:103718521;
1656D_1163_c0_g1_i1	747	1656C;1656D	2	119	2	119	0.24528	14.7723	56.1664	2.16025	110.173	51	5.67243	0.000109864	0.0221883	XP_020574740.1	homeobox-leucine zipper protein HOX12-like	Phalaenopsis equestris	-	-	-	-	-	-	-	-	-	-	-	-	-	-	-
1656D_11650_c0_g1_i1	832	1656C;1656D	38	6	38	6	3.93552	0.630842	23.2998	41.0447	5.55492	0.135338	-2.88536	0.0379301	0.933482	AGV31153.1	C-class MADS-box protein	Allium cepa	T2CD95	C-class MADS-box protein	AG	Allium cepa (Onion)	-	AG	-	-	nucleus [GO:0005634]; DNA-binding transcription factor activity [GO:0003700]; protein dimerization activity [GO:0046983]; RNA polymerase II regulatory region sequence-specific DNA binding [GO:0000977]; positive regulation of transcription by RNA polymerase II [GO:0045944]; transcription, DNA-templated [GO:0006351]	GO:0000977; GO:0003700; GO:0005634; GO:0006351; GO:0045944; GO:0046983	positive regulation of transcription by RNA polymerase II [GO:0045944]; transcription, DNA-templated [GO:0006351]	nucleus [GO:0005634]	DNA-binding transcription factor activity [GO:0003700]; protein dimerization activity [GO:0046983]; RNA polymerase II regulatory region sequence-specific DNA binding [GO:0000977]	SUBCELLULAR LOCATION: Nucleus {ECO:0000256|PROSITE-ProRule:PRU00251, ECO:0000256|SAAS:SAAS00579852}.	-
1656D_11735_c0_g1_i1	1077	1656C;1656D	74	6	74	6	5.28868	0.43739	42.742	79.9291	5.55492	0.0694981	-3.84688	0.00341644	0.254136	XP_020500018.1	histone H3-like centromeric protein CSE4	Labrus bergylta	-	-	-	-	-	-	-	-	-	-	-	-	-	-	-
1656D_11934_c0_g1_i1	1978	1656C;1656D	6	97	6	97	0.200353	3.32191	48.1426	6.48074	89.8045	13.8571	3.79256	0.00336433	0.251069	-	-	-	-	-	-	-	-	-	-	-	-	-	-	-	-	-	-
1656D_12030_c1_g1_i1	1722	1656C;1656D	91	7	91	7	3.58072	0.282246	52.386	98.2912	6.48074	0.0659341	-3.92283	0.00198863	0.1747	XP_020258076.1	protein LONGIFOLIA 1-like	Asparagus officinalis	-	-	-	-	-	-	-	-	-	-	-	-	-	-	-
1656D_12060_c0_g2_i1	1274	1656C;1656D	404	125	404	125	23.1113	7.30871	276.049	436.37	115.728	0.265205	-1.91482	0.024996	0.778326	-	-	-	-	-	-	-	-	-	-	-	-	-	-	-	-	-	-
1656D_12081_c0_g1_i1	1043	1656C;1656D	593	185	593	185	44.2866	14.0861	405.895	640.513	171.277	0.267405	-1.9029	0.0211073	0.717393	-	-	-	-	-	-	-	-	-	-	-	-	-	-	-	-	-	-
1656D_1210_c0_g1_i1	496	1656C;1656D	21	1	21	1	5.28205	0.25404	11.8042	22.6826	0.92582	0.0408163	-4.61471	0.0162553	0.634193	-	-	-	-	-	-	-	-	-	-	-	-	-	-	-	-	-	-
1656D_12114_c0_g1_i1	1210	1656C;1656D	4545	1022	4545	1022	278.027	63.8625	2927.67	4909.16	946.188	0.192739	-2.37528	0.00655861	0.380353	PWA87630.1	Superoxide dismutase	Artemisia annua	A0A2U1PPH4	Superoxide dismutase [Cu-Zn] (EC 1.15.1.1)	CTI12_AA128930	Artemisia annua (Sweet wormwood)	-	-	1.15.1.1	-	metal ion binding [GO:0046872]; superoxide dismutase activity [GO:0004784]	GO:0004784; GO:0046872	-	-	metal ion binding [GO:0046872]; superoxide dismutase activity [GO:0004784]	-	-
1656D_12128_c0_g1_i1	908	1656C;1656D	68	15	68	15	6.18212	1.38682	43.6678	73.4484	13.8873	0.189076	-2.40296	0.0447435	0.974521	-	-	-	-	-	-	-	-	-	-	-	-	-	-	-	-	-	-
1656D_12129_c1_g1_i1	530	1656C;1656D	3	30	3	30	0.666768	6.7409	15.5075	3.24037	27.7746	8.57143	3.09954	0.0492958	1	-	-	-	-	-	-	-	-	-	-	-	-	-	-	-	-	-	-
1656D_12275_c0_g1_i1	1279	1656C;1656D	1	360	1	360	0.0569178	20.9439	167.188	1.08012	333.295	308.571	8.26946	6.21143e-09	1.01628e-05	KOM46435.1	hypothetical protein LR48_Vigan07g013900	Vigna angularis	A0A0L9UU87	Uncharacterized protein	LR48_Vigan07g013900	Phaseolus angularis (Azuki bean) (Vigna angularis)	-	-	-	-	-	-	-	-	-	-	-
1656D_12281_c0_g1_i1	2194	1656C;1656D	440	75	440	75	13.0285	2.27883	272.345	475.254	69.4365	0.146104	-2.77493	0.00172375	0.159212	XP_010943349.1	PREDICTED: L-type lectin-domain containing receptor kinase IV.1-like	Elaeis guineensis	-	-	-	-	-	-	-	-	-	-	-	-	-	-	-
1656D_12326_c0_g1_i1	1549	1656C;1656D	24	385	24	385	1.07381	17.6376	191.182	25.923	356.441	13.75	3.78136	0.00011905	0.0235093	XP_020263689.1	alpha-galactosidase-like	Asparagus officinalis	-	-	-	-	-	-	-	-	-	-	-	-	-	-	-
1656D_12340_c1_g1_i1	1334	1656C;1656D	2052	326	2052	326	110.661	17.9774	1259.12	2216.41	301.817	0.136174	-2.87648	0.000614024	0.0783039	XP_020593992.1	LOW QUALITY PROTEIN: protein FAF-like, chloroplastic	Phalaenopsis equestris	-	-	-	-	-	-	-	-	-	-	-	-	-	-	-
1656D_12368_c0_g1_i1	756	1656C;1656D	28	2	28	2	3.36809	0.243621	16.0475	30.2435	1.85164	0.0612245	-4.02975	0.0152756	0.615081	XP_010916126.2	PREDICTED: uncharacterized protein LOC105041031	Elaeis guineensis	-	-	-	-	-	-	-	-	-	-	-	-	-	-	-
1656D_12395_c0_g2_i1	1137	1656C;1656D	68	6	68	6	4.51688	0.406814	39.5017	73.4484	5.55492	0.0756303	-3.72489	0.00486325	0.315802	-	-	-	-	-	-	-	-	-	-	-	-	-	-	-	-	-	-
1656D_12409_c0_g1_i1	1358	1656C;1656D	44	520	44	520	2.31968	28.038	264.476	47.5254	481.426	10.1299	3.34054	0.000264257	0.0433014	XP_020246844.1	TLC domain-containing protein At5g14285-like	Asparagus officinalis	-	-	-	-	-	-	-	-	-	-	-	-	-	-	-
1656D_12413_c0_g1_i1	861	1656C;1656D	182	6	182	6	17.9007	0.599493	101.069	196.582	5.55492	0.0282575	-5.14522	2.00697e-05	0.00600645	PIN27033.1	Peptide methionine sulfoxide reductase	Handroanthus impetiginosus	A0A2G9IBA8	Peptide methionine sulfoxide reductase (EC 1.8.4.11)	CDL12_00199	Handroanthus impetiginosus	-	-	1.8.4.11	-	peptide-methionine (S)-S-oxide reductase activity [GO:0008113]	GO:0008113	-	-	peptide-methionine (S)-S-oxide reductase activity [GO:0008113]	-	-
1656D_12423_c0_g1_i1	1376	1656C;1656D	1	71	1	71	0.0518487	3.76546	33.4067	1.08012	65.7332	60.8571	5.92735	0.000522091	0.0703219	-	-	-	-	-	-	-	-	-	-	-	-	-	-	-	-	-	-
1656D_12460_c0_g1_i1	1034	1656C;1656D	19	238	19	238	1.43605	18.3375	120.434	20.5223	220.345	10.7368	3.4245	0.00104923	0.113918	XP_008777839.1	PREDICTED: cucumber peeling cupredoxin-like	Phoenix dactylifera	A0A2H3X3P7	cucumber peeling cupredoxin-like	LOC103697702	Phoenix dactylifera (Date palm)	-	LOC103697702	-	-	electron transfer activity [GO:0009055]	GO:0009055	-	-	electron transfer activity [GO:0009055]	-	pda:103697702;
1656D_12497_c0_g1_i1	521	1656C;1656D	1	26	1	26	0.229282	6.02791	12.5757	1.08012	24.0713	22.2857	4.47805	0.0191637	0.688808	-	-	-	-	-	-	-	-	-	-	-	-	-	-	-	-	-	-
1656D_12534_c0_g1_i1	586	1656C;1656D	41	7	41	7	7.60616	1.30781	25.3829	44.2851	6.48074	0.146341	-2.77259	0.040822	0.945471	XP_020272248.1	auxin-responsive protein SAUR68-like	Asparagus officinalis	-	-	-	-	-	-	-	-	-	-	-	-	-	-	-
1656D_12585_c0_g1_i1	678	1656C;1656D	31	1	31	1	4.45923	0.145346	17.2048	33.4838	0.92582	0.0276498	-5.17659	0.00477561	0.310986	XP_020271284.1	uncharacterized protein LOC109846458 isoform X2	Asparagus officinalis	-	-	-	-	-	-	-	-	-	-	-	-	-	-	-
1656D_12710_c0_g1_i1	316	1656C;1656D	14	1	14	1	7.42746	0.562636	8.02377	15.1217	0.92582	0.0612245	-4.02975	0.0468499	1	XP_020255983.1	uncharacterized protein LOC109832911	Asparagus officinalis	-	-	-	-	-	-	-	-	-	-	-	-	-	-	-
1656D_12716_c0_g1_i1	468	1656C;1656D	54	7	54	7	15.0935	1.98473	32.4037	58.3267	6.48074	0.111111	-3.16993	0.016567	0.643972	-	-	-	-	-	-	-	-	-	-	-	-	-	-	-	-	-	-
1656D_12853_c0_g1_i1	1280	1656C;1656D	110	22	110	22	6.25466	1.27863	69.5908	118.814	20.368	0.171429	-2.54432	0.0211476	0.717393	XP_020257222.1	probable xyloglucan endotransglucosylase/hydrolase protein 28	Asparagus officinalis	-	-	-	-	-	-	-	-	-	-	-	-	-	-	-
1656D_12900_c1_g1_i1	1271	1656C;1656D	62	7	62	7	3.55759	0.410525	36.7242	66.9677	6.48074	0.0967742	-3.36923	0.0100223	0.492757	CAA73803.1	reverse transcriptase, partial	Allium cepa	O22294	Reverse transcriptase (Fragment)	-	Allium cepa (Onion)	-	-	-	-	RNA-directed DNA polymerase activity [GO:0003964]	GO:0003964	-	-	RNA-directed DNA polymerase activity [GO:0003964]	-	-
1656D_13067_c0_g1_i1	875	1656C;1656D	217	29	217	29	20.8351	2.82954	130.618	234.387	26.8488	0.114549	-3.12596	0.00190908	0.170697	NP_739619.1	ATP synthase F0 subunit 6	Thrips imaginis	Q8HQ02	ATP synthase subunit a	atp6	Thrips imaginis (Plague thrips)	-	atp6	-	-	integral component of membrane [GO:0016021]; mitochondrial inner membrane [GO:0005743]; proton-transporting ATP synthase complex, coupling factor F(o) [GO:0045263]; proton transmembrane transporter activity [GO:0015078]; ATP synthesis coupled proton transport [GO:0015986]	GO:0005743; GO:0015078; GO:0015986; GO:0016021; GO:0045263	ATP synthesis coupled proton transport [GO:0015986]	integral component of membrane [GO:0016021]; mitochondrial inner membrane [GO:0005743]; proton-transporting ATP synthase complex, coupling factor F(o) [GO:0045263]	proton transmembrane transporter activity [GO:0015078]	SUBCELLULAR LOCATION: Mitochondrion inner membrane {ECO:0000256|RuleBase:RU004450}; Multi-pass membrane protein {ECO:0000256|RuleBase:RU004450}.	-
1656D_13103_c1_g1_i1	1832	1656C;1656D	332	104	332	104	12.1337	3.89641	227.443	358.601	96.2853	0.268503	-1.89699	0.029991	0.836259	XP_010939967.1	PREDICTED: uncharacterized protein LOC105058665	Elaeis guineensis	-	-	-	-	-	-	-	-	-	-	-	-	-	-	-
1656D_13182_c0_g1_i1	769	1656C;1656D	6	59	6	59	0.702424	6.99782	30.5521	6.48074	54.6234	8.42857	3.07529	0.0224099	0.732343	XP_009392127.1	PREDICTED: ethylene-responsive transcription factor RAP2-9-like	Musa acuminata subsp. malaccensis	-	-	-	-	-	-	-	-	-	-	-	-	-	-	-
1656D_13675_c0_g2_i1	1130	1656C;1656D	231	35	231	35	15.4715	2.3926	140.956	249.509	32.4037	0.12987	-2.94486	0.00277099	0.220862	XP_020241833.1	heavy metal-associated isoprenylated plant protein 36-like	Asparagus officinalis	-	-	-	-	-	-	-	-	-	-	-	-	-	-	-
1656D_1383_c0_g1_i1	1012	1656C;1656D	108	28	108	28	8.41048	2.22208	71.2881	116.653	25.923	0.222222	-2.16993	0.0445848	0.972532	-	-	-	-	-	-	-	-	-	-	-	-	-	-	-	-	-	-
1656D_13832_c0_g1_i1	1064	1656C;1656D	1891.29	1.43413	1891	1	137.429	0.106276	1021.72	2042.51	0.92582	0.000453275	-11.1073	2.24731e-16	6.49034e-12	-	-	-	-	-	-	-	-	-	-	-	-	-	-	-	-	-	-
1656D_13832_c0_g2_i1	506	1656C;1656D	304.708	1.56587	305	2	73.8127	0.38333	165.645	329.438	1.85164	0.00562061	-7.47506	1.11681e-08	1.6127e-05	-	-	-	-	-	-	-	-	-	-	-	-	-	-	-	-	-	-
1656D_13842_c0_g1_i1	510	1656C;1656D	154	26	154	26	36.7366	6.27368	95.2052	166.339	24.0713	0.144712	-2.78874	0.00794331	0.42716	XP_020267271.1	hydrophobic protein LTI6B	Asparagus officinalis	-	-	-	-	-	-	-	-	-	-	-	-	-	-	-
1656D_13853_c0_g1_i1	536	1656C;1656D	28.8568	167	29	167	6.28101	36.7342	92.9678	31.3236	154.612	4.93596	2.30333	0.026245	0.789742	-	-	-	-	-	-	-	-	-	-	-	-	-	-	-	-	-	-
1656D_13861_c0_g1_i1	464	1656C;1656D	23	1	23	1	6.52132	0.288116	12.8843	24.8428	0.92582	0.0372671	-4.74595	0.0124263	0.546446	XP_011623943.1	ethylene-responsive transcription factor ERF003	Amborella trichopoda	-	-	-	-	-	-	-	-	-	-	-	-	-	-	-
1656D_13899_c0_g1_i1	746	1656C;1656D	85	383	85	383	10.446	47.646	223.2	91.8105	354.589	3.86218	1.94942	0.0266655	0.789742	-	-	-	-	-	-	-	-	-	-	-	-	-	-	-	-	-	-
1656D_13954_c0_g1_i1	683	1656C;1656D	2	45	2	45	0.284131	6.46248	21.9111	2.16025	41.6619	19.2857	4.26946	0.00789196	0.426424	YP_006291819.1	orf40a (mitochondrion)	Daucus carota subsp. sativus	I1TIG5	Orf40a (Orf40b) (Orf40c)	orf40c orf40a orf40b	Daucus carota subsp. sativus	orf40a orf40b	orf40c	-	-	mitochondrion [GO:0005739]	GO:0005739	-	mitochondrion [GO:0005739]	-	-	dcr:12598566;dcr:12598622;dcr:12598626;
1656D_13982_c0_g2_i1	1554	1656C;1656D	315.083	72.2033	315	72	14.0418	3.29481	203.449	340.239	66.659	0.195918	-2.35168	0.00920302	0.459046	XP_020263644.1	aldehyde dehydrogenase family 3 member F1-like	Asparagus officinalis	-	-	-	-	-	-	-	-	-	-	-	-	-	-	-
1656D_1405_c0_g1_i1	804	1656C;1656D	32	4	32	4	3.49316	0.442881	19.1336	34.564	3.70328	0.107143	-3.22239	0.0301437	0.838624	-	-	-	-	-	-	-	-	-	-	-	-	-	-	-	-	-	-
1656D_14197_c0_g1_i1	480	1656C;1656D	20	1	20	1	5.331	0.270153	11.2641	21.6025	0.92582	0.0428571	-4.54432	0.0186875	0.675476	XP_026278476.1	40S ribosomal protein S20	Frankliniella occidentalis	-	-	-	-	-	-	-	-	-	-	-	-	-	-	-
1656D_14260_c0_g1_i1	1548	1656C;1656D	199	62	199	62	8.91071	2.84258	136.173	214.945	57.4008	0.26705	-1.90482	0.0442969	0.967348	XP_020263935.1	LOW QUALITY PROTEIN: CBL-interacting serine/threonine-protein kinase 12-like	Asparagus officinalis	-	-	-	-	-	-	-	-	-	-	-	-	-	-	-
1656D_14802_c0_g1_i1	768	1656C;1656D	350	68	350	68	41.0599	8.08175	220.499	378.043	62.9558	0.166531	-2.58614	0.00412852	0.282043	XP_021293588.1	uncharacterized protein LOC110423629	Herrania umbratica	-	-	-	-	-	-	-	-	-	-	-	-	-	-	-
1656D_14916_c0_g1_i1	372	1656C;1656D	15	1	15	1	6.15671	0.431012	8.56384	16.2019	0.92582	0.0571429	-4.12928	0.0396939	0.945471	-	-	-	-	-	-	-	-	-	-	-	-	-	-	-	-	-	-
1656D_14954_c0_g2_i1	250	1656C;1656D	19	1	19	1	14.7898	0.824166	10.7241	20.5223	0.92582	0.0451128	-4.47032	0.0215513	0.717393	-	-	-	-	-	-	-	-	-	-	-	-	-	-	-	-	-	-
1656D_1496_c0_g1_i1	562	1656C;1656D	4	88	4	88	0.799473	17.7355	42.8963	4.32049	81.4722	18.8571	4.23704	0.00201721	0.177076	KYP75444.1	COBW domain-containing protein 2	Cajanus cajan	A0A151U819	COBW domain-containing protein 2	KK1_008173	Cajanus cajan (Pigeon pea) (Cajanus indicus)	-	-	-	-	nucleic acid binding [GO:0003676]	GO:0003676	-	-	nucleic acid binding [GO:0003676]	-	-
1656D_15121_c0_g1_i1	912	1656C;1656D	116	4	116	4	10.4785	0.367484	64.4988	125.294	3.70328	0.0295567	-5.08037	0.000128511	0.0250775	XP_020264473.1	probable xyloglucan endotransglucosylase/hydrolase protein 33	Asparagus officinalis	-	-	-	-	-	-	-	-	-	-	-	-	-	-	-
1656D_15134_c0_g1_i1	660	1656C;1656D	1	28	1	28	0.150542	4.25344	13.5015	1.08012	25.923	24	4.58496	0.0154896	0.61638	XP_010907441.1	PREDICTED: probable membrane-associated kinase regulator 4	Elaeis guineensis	-	-	-	-	-	-	-	-	-	-	-	-	-	-	-
1656D_15200_c0_g1_i1	735	1656C;1656D	2	28	2	28	0.25169	3.56677	14.0416	2.16025	25.923	12	3.58496	0.0337353	0.861749	-	-	-	-	-	-	-	-	-	-	-	-	-	-	-	-	-	-
1656D_15245_c0_g1_i1	749	1656C;1656D	60	2	60	2	7.32657	0.247219	33.3295	64.8074	1.85164	0.0285714	-5.12928	0.000895639	0.102645	XP_020248217.1	pyridoxine/pyridoxamine 5'-phosphate oxidase 2	Asparagus officinalis	-	-	-	-	-	-	-	-	-	-	-	-	-	-	-
1656D_15284_c0_g1_i1	466	1656C;1656D	16	1	16	1	4.50313	0.285714	9.1039	17.282	0.92582	0.0535714	-4.22239	0.0338303	0.861749	-	-	-	-	-	-	-	-	-	-	-	-	-	-	-	-	-	-
1656D_15393_c0_g1_i1	1808	1656C;1656D	422.699	114.339	423	114	15.6922	4.35098	281.218	456.892	105.543	0.231003	-2.11402	0.0138069	0.585535	XP_020251522.1	glucose-1-phosphate adenylyltransferase large subunit 1-like isoform X1	Asparagus officinalis	-	-	-	-	-	-	-	-	-	-	-	-	-	-	-
1656D_15666_c0_g1_i1	2744	1656C;1656D	1767	34900	1767	34900	40.6099	823.84	17109.8	1908.58	32311.1	16.9294	4.08146	0.00214238	0.183191	XP_010914548.1	PREDICTED: probable beta-D-xylosidase 2	Elaeis guineensis	-	-	-	-	-	-	-	-	-	-	-	-	-	-	-
1656D_15666_c1_g1_i1	249	1656C;1656D	1	30	1	30	0.783052	24.8927	14.4274	1.08012	27.7746	25.7143	4.6845	0.0126267	0.554048	-	-	-	-	-	-	-	-	-	-	-	-	-	-	-	-	-	-
1656D_15702_c0_g1_i1	556	1656C;1656D	36	3	36	3	7.33471	0.616692	20.831	38.8844	2.77746	0.0714286	-3.80735	0.0127217	0.556468	-	-	-	-	-	-	-	-	-	-	-	-	-	-	-	-	-	-
1656D_15707_c0_g1_i1	1003	1656C;1656D	3	41	3	41	0.236561	3.29419	20.5995	3.24037	37.9586	11.7143	3.5502	0.0200973	0.716126	XP_020252214.1	NAC domain-containing protein 100-like	Asparagus officinalis	-	-	-	-	-	-	-	-	-	-	-	-	-	-	-
1656D_15831_c0_g1_i1	365	1656C;1656D	25	2	25	2	10.5654	0.889476	14.4274	27.0031	1.85164	0.0685714	-3.86625	0.0214647	0.717393	-	-	-	-	-	-	-	-	-	-	-	-	-	-	-	-	-	-
1656D_16238_c0_g1_i1	523	1656C;1656D	2	28.621	2	29	0.455763	6.59053	14.5045	2.16025	26.8488	12.4286	3.63559	0.0306354	0.848087	-	-	-	-	-	-	-	-	-	-	-	-	-	-	-	-	-	-
1656D_16434_c0_g1_i1	371	1656C;1656D	1	18	1	18	0.41204	7.79468	8.87244	1.08012	16.6648	15.4286	3.94753	0.0494701	1	-	-	-	-	-	-	-	-	-	-	-	-	-	-	-	-	-	-
1656D_1648_c0_g1_i1	523	1656C;1656D	39	7	39	7	8.88738	1.61188	24.3028	42.1248	6.48074	0.153846	-2.70044	0.047407	1	-	-	-	-	-	-	-	-	-	-	-	-	-	-	-	-	-	-
1656D_16603_c0_g1_i1	624	1656C;1656D	4	71	4	71	0.663986	11.8704	35.0269	4.32049	65.7332	15.2143	3.92735	0.00492054	0.318627	XP_020572263.1	uncharacterized protein LOC110019066	Phalaenopsis equestris	-	-	-	-	-	-	-	-	-	-	-	-	-	-	-
1656D_16630_c0_g1_i1	493	1656C;1656D	24	2	24	2	6.10475	0.514177	13.8873	25.923	1.85164	0.0714286	-3.80735	0.0241598	0.767531	-	-	-	-	-	-	-	-	-	-	-	-	-	-	-	-	-	-
1656D_16816_c0_g1_i1	409	1656C;1656D	21	1	21	1	7.39629	0.364416	11.8042	22.6826	0.92582	0.0408163	-4.61471	0.0162553	0.634193	-	-	-	-	-	-	-	-	-	-	-	-	-	-	-	-	-	-
1656D_16827_c0_g1_i1	478	1656C;1656D	371	53	371	53	99.6608	14.4416	224.897	400.726	49.0685	0.122449	-3.02975	0.000963808	0.107784	-	-	-	-	-	-	-	-	-	-	-	-	-	-	-	-	-	-
1656D_16846_c0_g1_i1	1014	1656C;1656D	11	111	11	111	0.854267	8.785	57.3237	11.8814	102.766	8.64935	3.11259	0.00900744	0.456986	YP_009026399.2	Coat Protein	Arhar cryptic virus-I	X5M5C8	Coat Protein	CP	Arhar cryptic virus-I	-	CP	-	-	viral capsid [GO:0019028]	GO:0019028	-	viral capsid [GO:0019028]	-	-	vg:18995871;
1656D_17075_c0_g1_i1	371	1656C;1656D	2	31	2	31	0.824079	13.4242	15.4303	2.16025	28.7004	13.2857	3.7318	0.0253933	0.785614	-	-	-	-	-	-	-	-	-	-	-	-	-	-	-	-	-	-
1656D_17084_c0_g1_i1	450	1656C;1656D	16	1	16	1	4.77409	0.305492	9.1039	17.282	0.92582	0.0535714	-4.22239	0.0338303	0.861749	KRZ65056.1	Aquaporin TIP3-2	Trichinella papuae	A0A0V1M030	Aquaporin TIP3-2	TIP3-2 T10_11236	Trichinella papuae	-	TIP3-2	-	-	integral component of membrane [GO:0016021]; channel activity [GO:0015267]	GO:0015267; GO:0016021	-	integral component of membrane [GO:0016021]	channel activity [GO:0015267]	-	-
1656D_17090_c0_g1_i1	339	1656C;1656D	19	2	19	2	9.03084	1.00661	11.187	20.5223	1.85164	0.0902256	-3.47032	0.0456307	0.984747	-	-	-	-	-	-	-	-	-	-	-	-	-	-	-	-	-	-
1656D_17157_c0_g1_i1	568	1656C;1656D	597	63	597	63	117.123	12.4572	351.58	644.834	58.3267	0.0904523	-3.4667	0.000101965	0.0208852	ONK63066.1	uncharacterized protein A4U43_C07F11060	Asparagus officinalis	-	-	-	-	-	-	-	-	-	-	-	-	-	-	-
1656D_17208_c0_g1_i1	811	1656C;1656D	5	44	5	44	0.53852	4.80814	23.0684	5.40062	40.7361	7.54286	2.91511	0.0395018	0.945471	-	-	-	-	-	-	-	-	-	-	-	-	-	-	-	-	-	-
1656D_17317_c0_g1_i1	774	1656C;1656D	68	5	68	5	7.87914	0.587111	39.0387	73.4484	4.6291	0.0630252	-3.98793	0.00319038	0.24195	ONK72610.1	uncharacterized protein A4U43_C04F21200	Asparagus officinalis	-	-	-	-	-	-	-	-	-	-	-	-	-	-	-
1656D_17380_c0_g1_i1	883	1656C;1656D	52	9	52	9	4.92575	0.86651	32.2494	56.1664	8.33238	0.148352	-2.75291	0.0328578	0.861749	XP_009396286.1	PREDICTED: non-specific lipid-transfer protein-like	Musa acuminata subsp. malaccensis	-	-	-	-	-	-	-	-	-	-	-	-	-	-	-
1656D_17532_c0_g1_i1	1124	1656C;1656D	1	37	1	37	0.0674562	2.54727	17.6677	1.08012	34.2553	31.7143	4.98706	0.00652067	0.378486	XP_020251392.1	glucan endo-1,3-beta-glucosidase 11-like	Asparagus officinalis	-	-	-	-	-	-	-	-	-	-	-	-	-	-	-
1656D_17570_c0_g1_i1	549	1656C;1656D	47	6	47	6	9.8037	1.26323	28.1604	50.7658	5.55492	0.109422	-3.19202	0.0191939	0.68968	XP_020242393.1	LOW QUALITY PROTEIN: formin-like protein 11, partial	Asparagus officinalis	-	-	-	-	-	-	-	-	-	-	-	-	-	-	-
1656D_17577_c0_g1_i1	1006	1656C;1656D	3251	303	3251	303	255.283	24.2444	1896	3511.48	280.523	0.0798875	-3.64589	3.97507e-05	0.0103193	XP_009421475.1	PREDICTED: fasciclin-like arabinogalactan protein 13	Musa acuminata subsp. malaccensis	-	-	-	-	-	-	-	-	-	-	-	-	-	-	-
1656D_17581_c0_g1_i1	974	1656C;1656D	229	38	229	38	18.8195	3.18049	141.265	247.348	35.1812	0.142233	-2.81367	0.00399726	0.278511	-	-	-	-	-	-	-	-	-	-	-	-	-	-	-	-	-	-
1656D_17611_c0_g1_i1	800	1656C;1656D	167	37	167	37	18.372	4.12806	107.318	180.381	34.2553	0.189906	-2.39664	0.0174429	0.658309	-	-	-	-	-	-	-	-	-	-	-	-	-	-	-	-	-	-
1656D_17882_c0_g1_i1	873	1656C;1656D	81	11	81	11	7.8037	1.07688	48.837	87.49	10.184	0.116402	-3.10281	0.0108673	0.511162	XP_020251889.1	uncharacterized protein LOC109829162	Asparagus officinalis	-	-	-	-	-	-	-	-	-	-	-	-	-	-	-
1656D_17994_c0_g1_i1	600	1656C;1656D	391	25	391	25	69.5333	4.48085	222.737	422.328	23.1455	0.0548045	-4.18956	1.85179e-05	0.00567434	XP_020257706.1	peamaclein-like	Asparagus officinalis	-	-	-	-	-	-	-	-	-	-	-	-	-	-	-
1656D_18005_c0_g1_i1	1083	1656C;1656D	943	4062	943	4062	66.8871	293.904	2389.62	1018.56	3760.68	3.69217	1.88447	0.025229	0.7833	XP_008798183.1	PREDICTED: mannose-specific lectin 3-like	Phoenix dactylifera	A0A2H3YG77	mannose-specific lectin 3-like	LOC103713139	Phoenix dactylifera (Date palm)	-	LOC103713139	-	-	carbohydrate binding [GO:0030246]	GO:0030246	-	-	carbohydrate binding [GO:0030246]	-	pda:103713139;
1656D_18166_c0_g2_i1	1075	1656C;1656D	227	54.9753	227	55	16.2646	4.01767	148.054	245.188	50.9201	0.207678	-2.26758	0.0165647	0.643972	-	-	-	-	-	-	-	-	-	-	-	-	-	-	-	-	-	-
1656D_18177_c0_g1_i1	1833	1656C;1656D	676	110	676	110	24.69	4.11855	416.002	730.163	101.84	0.139476	-2.84191	0.000883911	0.101502	NP_739611.1	cytochrome c oxidase subunit I	Thrips imaginis	Q94XE1	Cytochrome c oxidase subunit 1 (EC 1.9.3.1)	cox1	Thrips imaginis (Plague thrips)	-	cox1	1.9.3.1	PATHWAY: Energy metabolism; oxidative phosphorylation. {ECO:0000256|RuleBase:RU000369, ECO:0000256|SAAS:SAAS00887552}.	integral component of membrane [GO:0016021]; mitochondrial inner membrane [GO:0005743]; respiratory chain complex IV [GO:0045277]; cytochrome-c oxidase activity [GO:0004129]; heme binding [GO:0020037]; metal ion binding [GO:0046872]; aerobic respiration [GO:0009060]; oxidative phosphorylation [GO:0006119]	GO:0004129; GO:0005743; GO:0006119; GO:0009060; GO:0016021; GO:0020037; GO:0045277; GO:0046872	aerobic respiration [GO:0009060]; oxidative phosphorylation [GO:0006119]	integral component of membrane [GO:0016021]; mitochondrial inner membrane [GO:0005743]; respiratory chain complex IV [GO:0045277]	cytochrome-c oxidase activity [GO:0004129]; heme binding [GO:0020037]; metal ion binding [GO:0046872]	SUBCELLULAR LOCATION: Mitochondrion inner membrane {ECO:0000256|RuleBase:RU000369}; Multi-pass membrane protein {ECO:0000256|RuleBase:RU000369}.	-
1656D_18180_c0_g1_i1	791	1656C;1656D	231	933	231	933	25.8663	105.922	556.649	249.509	863.79	3.46197	1.79159	0.0267485	0.789742	XP_014508015.1	protein P21	Vigna radiata var. radiata	A0A1S3UPU3	protein P21-like	LOC106767605	Vigna radiata var. radiata (Mung bean) (Phaseolus aureus)	-	LOC106767605	-	-	-	-	-	-	-	-	vra:106767605;
1656D_18298_c0_g1_i1	552	1656C;1656D	20	2	20	2	4.13153	0.416765	11.7271	21.6025	1.85164	0.0857143	-3.54432	0.0399296	0.945471	AFQ00668.1	flowering locus T-like protein 2	Allium cepa	J7HE54	FT5 (Flowering locus T-like protein 2)	-	Allium cepa (Onion)	-	-	-	-	-	-	-	-	-	-	-
1656D_18304_c0_g1_i2	6186	1656C;1656D	82	398	82	398	0.784968	3.92087	228.523	88.5701	368.476	4.16028	2.05668	0.0194581	0.697219	PRQ17740.1	putative RNA-directed DNA polymerase	Rosa chinensis	A0A2P6P744	Putative RNA-directed DNA polymerase (EC 2.7.7.49)	RchiOBHm_Chr7g0198271	Rosa chinensis (China rose)	-	-	2.7.7.49	-	nucleic acid binding [GO:0003676]; RNA-directed DNA polymerase activity [GO:0003964]; zinc ion binding [GO:0008270]; DNA integration [GO:0015074]	GO:0003676; GO:0003964; GO:0008270; GO:0015074	DNA integration [GO:0015074]	-	nucleic acid binding [GO:0003676]; RNA-directed DNA polymerase activity [GO:0003964]; zinc ion binding [GO:0008270]	-	-
1656D_1837_c0_g1_i1	2141	1656C;1656D	1868	295	1868	295	56.893	9.21848	1145.39	2017.67	273.117	0.135362	-2.8851	0.000573575	0.0761615	XP_020251296.1	LOW QUALITY PROTEIN: protein NRT1/ PTR FAMILY 6.2	Asparagus officinalis	-	-	-	-	-	-	-	-	-	-	-	-	-	-	-
1656D_18414_c0_g1_i1	630	1656C;1656D	40	5	40	5	6.52804	0.822186	23.917	43.2049	4.6291	0.107143	-3.22239	0.0227289	0.740674	XP_020274668.1	inactive protein RESTRICTED TEV MOVEMENT 2-like	Asparagus officinalis	-	-	-	-	-	-	-	-	-	-	-	-	-	-	-
1656D_18430_c0_g1_i1	685	1656C;1656D	27	2	27	2	3.81656	0.285811	15.5075	29.1633	1.85164	0.0634921	-3.97728	0.0170704	0.658309	-	-	-	-	-	-	-	-	-	-	-	-	-	-	-	-	-	-
1656D_18450_c0_g1_i1	571	1656C;1656D	4	57	4	57	0.777515	11.1627	28.5461	4.32049	52.7717	12.2143	3.6105	0.0111668	0.522059	ONK74579.1	uncharacterized protein A4U43_C03F7940	Asparagus officinalis	-	-	-	-	-	-	-	-	-	-	-	-	-	-	-
1656D_18516_c0_g1_i1	1055	1656C;1656D	124	2	124	2	9.11593	0.149928	67.8935	133.935	1.85164	0.0138249	-6.17659	1.82653e-05	0.00564183	XP_019702780.1	PREDICTED: E3 ubiquitin-protein ligase SGR9, amyloplastic-like	Elaeis guineensis	-	-	-	-	-	-	-	-	-	-	-	-	-	-	-
1656D_18517_c0_g1_i1	365	1656C;1656D	2	32	2	32	0.845235	14.2316	15.8932	2.16025	29.6262	13.7143	3.77761	0.0231738	0.751145	-	-	-	-	-	-	-	-	-	-	-	-	-	-	-	-	-	-
1656D_18552_c0_g1_i1	1573	1656C;1656D	2	133	2	133	0.0878142	5.98002	62.6472	2.16025	123.134	57	5.83289	5.71382e-05	0.013838	XP_020276123.1	cytokinin dehydrogenase 4-like	Asparagus officinalis	-	-	-	-	-	-	-	-	-	-	-	-	-	-	-
1656D_18657_c0_g1_i1	499	1656C;1656D	24	1	24	1	5.96826	0.251093	13.4244	25.923	0.92582	0.0357143	-4.80735	0.010921	0.512228	-	-	-	-	-	-	-	-	-	-	-	-	-	-	-	-	-	-
1656D_18825_c0_g1_i1	417	1656C;1656D	1	21	1	21	0.341576	7.38113	10.2612	1.08012	19.4422	18	4.16993	0.0339915	0.861749	-	-	-	-	-	-	-	-	-	-	-	-	-	-	-	-	-	-
1656D_18865_c0_g1_i1	539	1656C;1656D	4	55	4	55	0.861928	11.9818	27.6203	4.32049	50.9201	11.7857	3.55897	0.0126615	0.555097	XP_010922582.1	PREDICTED: uncharacterized protein LOC105045858	Elaeis guineensis	-	-	-	-	-	-	-	-	-	-	-	-	-	-	-
1656D_19036_c0_g1_i1	1309	1656C;1656D	16	108	16	108	0.883957	6.10021	58.6353	17.282	99.9886	5.78571	2.5325	0.0273864	0.798721	XP_020269835.1	vacuolar-sorting receptor 6-like	Asparagus officinalis	-	-	-	-	-	-	-	-	-	-	-	-	-	-	-
1656D_19098_c0_g1_i2	865	1656C;1656D	1.40327	18.1256	1	18	0.137064	1.79867	8.87244	1.08012	16.6648	15.4286	3.94753	0.0494701	1	XP_020272636.1	pentatricopeptide repeat-containing protein At5g46100	Asparagus officinalis	-	-	-	-	-	-	-	-	-	-	-	-	-	-	-
1656D_19110_c0_g1_i3	1560	1656C;1656D	307.429	80.8323	307	81	13.6361	3.6713	203.295	331.598	74.9914	0.226152	-2.14464	0.0166509	0.645918	-	-	-	-	-	-	-	-	-	-	-	-	-	-	-	-	-	-
1656D_19138_c0_g1_i1	2421	1656C;1656D	172	1	172	1	4.55125	0.0271648	93.3535	185.781	0.92582	0.00498339	-7.64866	5.22465e-07	0.00034888	XP_019264258.1	PREDICTED: uncharacterized protein LOC109241890	Nicotiana attenuata	-	-	-	-	-	-	-	-	-	-	-	-	-	-	-
1656D_19165_c0_g1_i1	676	1656C;1656D	2140	548	2140	548	309.345	80.0495	1409.41	2311.46	507.349	0.219493	-2.18776	0.00770183	0.4185	XP_010930181.1	PREDICTED: 15.4 kDa class V heat shock protein	Elaeis guineensis	-	-	-	-	-	-	-	-	-	-	-	-	-	-	-
1656D_19170_c0_g1_i1	1999	1656C;1656D	10	128	10	128	0.329826	4.33005	64.6531	10.8012	118.505	10.9714	3.45568	0.00363664	0.259649	XP_020261547.1	LOW QUALITY PROTEIN: beta-arabinofuranosyltransferase RAY1	Asparagus officinalis	-	-	-	-	-	-	-	-	-	-	-	-	-	-	-
1656D_19173_c0_g1_i2	776	1656C;1656D	2749.2	813.706	2749	814	317.247	95.1632	1861.44	2969.26	753.618	0.253807	-1.9782	0.016879	0.653012	XP_020273172.1	uncharacterized protein LOC109848198	Asparagus officinalis	-	-	-	-	-	-	-	-	-	-	-	-	-	-	-
1656D_19176_c0_g1_i1	381	1656C;1656D	16	1	16	1	6.33117	0.414423	9.1039	17.282	0.92582	0.0535714	-4.22239	0.0338303	0.861749	CAN78706.1	hypothetical protein VITISV_028658	Vitis vinifera	A5B6L3	Uncharacterized protein	VITISV_028658	Vitis vinifera (Grape)	-	-	-	-	-	-	-	-	-	-	-
1656D_19182_c0_g1_i1	341	1656C;1656D	15	1	15	1	7.07569	0.498346	8.56384	16.2019	0.92582	0.0571429	-4.12928	0.0396939	0.945471	-	-	-	-	-	-	-	-	-	-	-	-	-	-	-	-	-	-
1656D_19286_c0_g1_i1	1923	1656C;1656D	136	39	136	39	4.69399	1.38029	91.5019	146.897	36.107	0.245798	-2.02445	0.0479448	1	XP_020261753.1	LOW QUALITY PROTEIN: L-ascorbate oxidase homolog	Asparagus officinalis	-	-	-	-	-	-	-	-	-	-	-	-	-	-	-
1656D_19343_c0_g1_i1	1558	1656C;1656D	52.5573	247.923	53	248	2.33487	11.278	143.425	57.2465	229.603	4.01078	2.00388	0.0338631	0.861749	XP_020249530.1	3-ketoacyl-CoA synthase 12-like	Asparagus officinalis	-	-	-	-	-	-	-	-	-	-	-	-	-	-	-
1656D_19347_c0_g1_i1	687	1656C;1656D	4	38	4	38	0.5626	5.40387	19.7508	4.32049	35.1812	8.14286	3.02554	0.0407242	0.945471	XP_020246232.1	LOW QUALITY PROTEIN: B3 domain-containing protein Os11g0156000-like	Asparagus officinalis	-	-	-	-	-	-	-	-	-	-	-	-	-	-	-
1656D_1936_c0_g1_i1	596	1656C;1656D	15	123	15	123	2.69852	22.3049	65.0389	16.2019	113.876	7.02857	2.81323	0.0137161	0.582754	-	-	-	-	-	-	-	-	-	-	-	-	-	-	-	-	-	-
1656D_19360_c0_g1_i1	1399	1656C;1656D	5	90	5	90	0.253882	4.67513	44.3622	5.40062	83.3238	15.4286	3.94753	0.00302043	0.23608	CAN78448.1	hypothetical protein VITISV_026811	Vitis vinifera	A5AXT6	Uncharacterized protein	VITISV_026811	Vitis vinifera (Grape)	-	-	-	-	-	-	-	-	-	-	-
1656D_19434_c0_g2_i2	2256	1656C;1656D	32.7608	257.28	33	257	0.939513	7.57216	136.79	35.6441	237.936	6.67532	2.73884	0.00535229	0.33732	-	-	-	-	-	-	-	-	-	-	-	-	-	-	-	-	-	-
1656D_19503_c0_g1_i1	1187	1656C;1656D	278.018	1099.38	278	1099	17.4415	70.4376	658.875	300.274	1017.48	3.38849	1.76064	0.0284519	0.812388	AJV90886.1	PLATZ1	Narcissus tazetta var. chinensis	A0A0D4WUM0	PLATZ1	-	Narcissus tazetta var. chinensis	-	-	-	-	-	-	-	-	-	-	-
1656D_19518_c1_g1_i1	499	1656C;1656D	14	1	14	1	3.48148	0.251093	8.02377	15.1217	0.92582	0.0612245	-4.02975	0.0468499	1	CAN67819.1	hypothetical protein VITISV_041315	Vitis vinifera	A5BDX8	Uncharacterized protein	VITISV_041315	Vitis vinifera (Grape)	-	-	-	-	nucleic acid binding [GO:0003676]; DNA integration [GO:0015074]	GO:0003676; GO:0015074	DNA integration [GO:0015074]	-	nucleic acid binding [GO:0003676]	-	-
1656D_19633_c0_g1_i1	555	1656C;1656D	53	7	53	7	10.8374	1.44405	31.8636	57.2465	6.48074	0.113208	-3.14296	0.0176847	0.658309	-	-	-	-	-	-	-	-	-	-	-	-	-	-	-	-	-	-
1656D_19730_c0_g1_i1	1158	1656C;1656D	136	13	136	13	8.816	0.86038	79.4662	146.897	12.0357	0.0819328	-3.60942	0.00155231	0.148326	ABR24157.1	anthocyanidin synthase	Allium cepa	A6MJM9	Anthocyanidin synthase	ANS	Allium cepa (Onion)	-	ANS	-	-	metal ion binding [GO:0046872]; oxidoreductase activity [GO:0016491]	GO:0016491; GO:0046872	-	-	metal ion binding [GO:0046872]; oxidoreductase activity [GO:0016491]	-	-
1656D_19763_c0_g2_i2	1183	1656C;1656D	9	191.229	9	191	0.567136	12.3063	93.2764	9.72111	176.832	18.1905	4.18511	0.000293336	0.0464787	PSR88257.1	Carboxylesterase	Actinidia chinensis var. chinensis	A0A2R6PBV2	Carboxylesterase	CEY00_Acc31286	Actinidia chinensis var. chinensis	-	-	-	-	hydrolase activity [GO:0016787]; metabolic process [GO:0008152]	GO:0008152; GO:0016787	metabolic process [GO:0008152]	-	hydrolase activity [GO:0016787]	-	-
1656D_19774_c0_g1_i1	784	1656C;1656D	83	6	83	6	9.42476	0.690599	47.6026	89.6502	5.55492	0.0619621	-4.01247	0.00205685	0.180419	XP_020083905.1	thaumatin-like protein 1	Ananas comosus	-	-	-	-	-	-	-	-	-	-	-	-	-	-	-
1656D_19807_c0_g1_i1	573	1656C;1656D	1	18	1	18	0.193128	3.50433	8.87244	1.08012	16.6648	15.4286	3.94753	0.0494701	1	XP_020257788.1	ABC transporter G family member 9	Asparagus officinalis	-	-	-	-	-	-	-	-	-	-	-	-	-	-	-
1656D_19854_c0_g1_i1	752	1656C;1656D	117	13	117	13	14.1947	1.59691	69.2051	126.374	12.0357	0.0952381	-3.39232	0.00337944	0.251708	XP_020574052.1	uncharacterized protein LOC110020331	Phalaenopsis equestris	-	-	-	-	-	-	-	-	-	-	-	-	-	-	-
1656D_19871_c0_g1_i1	1674	1656C;1656D	6	89	6	89	0.244261	3.712	44.4394	6.48074	82.398	12.7143	3.66838	0.0048586	0.315678	-	-	-	-	-	-	-	-	-	-	-	-	-	-	-	-	-	-
1656D_19969_c0_g1_i1	815	1656C;1656D	46	7	46	7	4.91736	0.759304	28.0832	49.6857	6.48074	0.130435	-2.9386	0.0284419	0.812388	XP_026282205.1	60S ribosomal protein L5	Frankliniella occidentalis	-	-	-	-	-	-	-	-	-	-	-	-	-	-	-
1656D_20142_c1_g1_i1	826	1656C;1656D	1	47	1	47	0.104719	4.99575	22.2968	1.08012	43.5135	40.2857	5.3322	0.00282404	0.224065	-	-	-	-	-	-	-	-	-	-	-	-	-	-	-	-	-	-
1656D_20172_c0_g1_i1	758	1656C;1656D	162.415	32.2492	162	32	19.4538	3.91192	102.303	174.98	29.6262	0.169312	-2.56224	0.0124219	0.546446	-	-	-	-	-	-	-	-	-	-	-	-	-	-	-	-	-	-
1656D_20232_c0_g1_i1	743	1656C;1656D	142	11	142	11	17.5622	1.37712	81.7808	153.378	10.184	0.0663984	-3.91271	0.000713278	0.088111	XP_008785073.1	PREDICTED: TATA-binding protein-associated factor 2N-like isoform X2	Phoenix dactylifera	A0A2H3ZNC4	TATA-binding protein-associated factor 2N-like isoform X2	LOC103703823	Phoenix dactylifera (Date palm)	-	LOC103703823	-	-	metal ion binding [GO:0046872]	GO:0046872	-	-	metal ion binding [GO:0046872]	-	-
1656D_20264_c1_g1_i1	683	1656C;1656D	1	26	1	26	0.142065	3.73388	12.5757	1.08012	24.0713	22.2857	4.47805	0.0191637	0.688808	-	-	-	-	-	-	-	-	-	-	-	-	-	-	-	-	-	-
1656D_20312_c0_g1_i1	828	1656C;1656D	1.5884	32.3963	2	32	0.16572	3.43095	15.8932	2.16025	29.6262	13.7143	3.77761	0.0231738	0.751145	-	-	-	-	-	-	-	-	-	-	-	-	-	-	-	-	-	-
1656D_20386_c0_g1_i1	1325	1656C;1656D	105	23	105	23	5.71156	1.27925	67.3534	113.413	21.2939	0.187755	-2.41308	0.0288229	0.812513	GAU31768.1	hypothetical protein TSUD_22140	Trifolium subterraneum	A0A2Z6MI92	Uncharacterized protein	TSUD_22140	Trifolium subterraneum (Subterranean clover)	-	-	-	-	-	-	-	-	-	-	-
1656D_20393_c0_g1_i1	2800	1656C;1656D	444	1546	444	1546	9.9768	35.6839	955.446	479.575	1431.32	2.98456	1.57752	0.0477847	1	XP_020264761.1	LOW QUALITY PROTEIN: probable alpha,alpha-trehalose-phosphate synthase	UDP-forming 9Asparagus officinalis	-	-	-	-	-	-	-	-	-	-	-	-	-	-	-
1656D_20470_c0_g1_i1	760	1656C;1656D	303	94	303	94	36.1396	11.3551	207.152	327.277	87.0271	0.265912	-1.91098	0.0309817	0.853228	XP_010943617.1	PREDICTED: uncharacterized protein LOC105061305	Elaeis guineensis	-	-	-	-	-	-	-	-	-	-	-	-	-	-	-
1656D_20478_c0_g2_i1	1758	1656C;1656D	34.6734	3.27355	35	3	1.33096	0.12878	20.2909	37.8043	2.77746	0.0734694	-3.76671	0.0139562	0.589041	XP_020264364.1	fasciclin-like arabinogalactan protein 1	Asparagus officinalis	-	-	-	-	-	-	-	-	-	-	-	-	-	-	-
1656D_20479_c0_g1_i1	2056	1656C;1656D	2815	565	2815	565	89.8546	18.5001	1781.82	3040.55	523.088	0.172038	-2.5392	0.00257852	0.21111	AEM44785.1	4-coumarate:coenzyme A ligase	Allium sativum	G3CU71	4-coumarate:coenzyme A ligase (EC 6.2.1.12)	-	Allium sativum (Garlic)	-	-	6.2.1.12	-	4-coumarate-CoA ligase activity [GO:0016207]; metabolic process [GO:0008152]	GO:0008152; GO:0016207	metabolic process [GO:0008152]	-	4-coumarate-CoA ligase activity [GO:0016207]	-	-
1656D_20491_c0_g1_i1	1208	1656C;1656D	158	610	158	610	9.68618	38.1996	367.705	170.66	564.75	3.30922	1.72649	0.0369462	0.916753	XP_009379775.1	PREDICTED: uncharacterized protein LOC103968341	Musa acuminata subsp. malaccensis	M0RIH2	Uncharacterized protein	103968341	Musa acuminata subsp. malaccensis (Wild banana) (Musa malaccensis)	-	103968341	-	-	-	-	-	-	-	-	mus:103968341;
1656D_20500_c0_g1_i1	454	1656C;1656D	24.4786	2.43677	24	2	7.19434	0.732524	13.8873	25.923	1.85164	0.0714286	-3.80735	0.0241598	0.767531	-	-	-	-	-	-	-	-	-	-	-	-	-	-	-	-	-	-
1656D_20506_c0_g1_i3	1932	1656C;1656D	1094.82	152.522	1095	153	37.5807	5.36867	662.193	1182.74	141.65	0.119765	-3.06172	0.000287729	0.0460374	-	-	-	-	-	-	-	-	-	-	-	-	-	-	-	-	-	-
1656D_20524_c0_g1_i1	747	1656C;1656D	168	33	168	33	20.6035	4.09651	106.006	181.461	30.5521	0.168367	-2.57032	0.0116087	0.539532	XP_009399917.1	PREDICTED: protein LURP-one-related 8-like	Musa acuminata subsp. malaccensis	M0SWI4	Uncharacterized protein	103984191	Musa acuminata subsp. malaccensis (Wild banana) (Musa malaccensis)	-	103984191	-	-	-	-	-	-	-	-	mus:103984191;
1656D_20604_c0_g1_i1	1438	1656C;1656D	3750	70	3750	70	183.961	3.51389	2057.64	4050.46	64.8074	0.016	-5.96578	2.3804e-09	5.09239e-06	XP_020277356.1	uncharacterized protein LOC109851567	Asparagus officinalis	-	-	-	-	-	-	-	-	-	-	-	-	-	-	-
1656D_20643_c0_g1_i1	661	1656C;1656D	46	1	46	1	6.90719	0.151544	25.3057	49.6857	0.92582	0.0186335	-5.74595	0.00108685	0.117122	XP_009401112.1	PREDICTED: uncharacterized protein LOC103985205	Musa acuminata subsp. malaccensis	-	-	-	-	-	-	-	-	-	-	-	-	-	-	-
1656D_20660_c0_g1_i1	1034	1656C;1656D	46	9	46	9	3.47676	0.693436	29.009	49.6857	8.33238	0.167702	-2.57603	0.0482155	1	XP_020241398.1	galactoside 2-alpha-L-fucosyltransferase-like	Asparagus officinalis	-	-	-	-	-	-	-	-	-	-	-	-	-	-	-
1656D_20660_c1_g1_i1	729	1656C;1656D	29	2	29	2	3.69784	0.258134	16.5876	31.3236	1.85164	0.0591133	-4.08037	0.0136984	0.582362	XP_020241398.1	galactoside 2-alpha-L-fucosyltransferase-like	Asparagus officinalis	-	-	-	-	-	-	-	-	-	-	-	-	-	-	-
1656D_20661_c0_g2_i1	1271	1656C;1656D	11	81.2719	11	81	0.631186	4.76631	43.4364	11.8814	74.9914	6.31169	2.65803	0.029932	0.835016	XP_010906014.1	PREDICTED: uncharacterized protein LOC105033060	Elaeis guineensis	-	-	-	-	-	-	-	-	-	-	-	-	-	-	-
1656D_20677_c0_g1_i1	1504	1656C;1656D	164.121	28.6775	164	29	7.61458	1.36202	101.995	177.14	26.8488	0.151568	-2.72196	0.00843495	0.442718	XP_020268423.1	probable pectinesterase 53	Asparagus officinalis	-	-	-	-	-	-	-	-	-	-	-	-	-	-	-
1656D_20733_c0_g1_i1	814	1656C;1656D	12	213	12	213	1.28522	23.1477	105.081	12.9615	197.2	15.2143	3.92735	0.000392512	0.0571377	XP_010942623.1	PREDICTED: uncharacterized protein LOC105060555	Elaeis guineensis	-	-	-	-	-	-	-	-	-	-	-	-	-	-	-
1656D_20734_c0_g1_i1	308	1656C;1656D	19	1	19	1	10.4763	0.584296	10.7241	20.5223	0.92582	0.0451128	-4.47032	0.0215513	0.717393	XP_026289064.1	40S ribosomal protein S18	Frankliniella occidentalis	-	-	-	-	-	-	-	-	-	-	-	-	-	-	-
1656D_20767_c0_g1_i1	797	1656C;1656D	4787	417	4787	417	529.723	46.7935	2778.31	5170.55	386.067	0.0746665	-3.74339	4.79426e-05	0.0120663	XP_008786990.1	PREDICTED: 14 kDa proline-rich protein DC2.15-like	Phoenix dactylifera	A0A2H3XPY8	14 kDa proline-rich protein DC2.15-like	LOC103705143	Phoenix dactylifera (Date palm)	-	LOC103705143	-	-	-	-	-	-	-	-	pda:103705143;
1656D_20768_c0_g1_i1	972	1656C;1656D	78	1	78	1	6.42886	0.0839386	42.5877	84.2496	0.92582	0.010989	-6.50779	9.52466e-05	0.020042	-	-	-	-	-	-	-	-	-	-	-	-	-	-	-	-	-	-
1656D_20890_c0_g1_i1	896	1656C;1656D	13.6816	147	14	147	1.26834	13.855	75.6086	15.1217	136.096	9	3.16993	0.00502831	0.320928	-	-	-	-	-	-	-	-	-	-	-	-	-	-	-	-	-	-
1656D_20945_c0_g1_i1	486	1656C;1656D	33	5	33	5	8.61428	1.31919	20.1366	35.6441	4.6291	0.12987	-2.94486	0.0409009	0.945471	ONK75015.1	uncharacterized protein A4U43_C03F12420	Asparagus officinalis	-	-	-	-	-	-	-	-	-	-	-	-	-	-	-
1656D_20966_c0_g1_i1	773	1656C;1656D	33	3	33	3	3.83156	0.352979	19.2108	35.6441	2.77746	0.0779221	-3.68182	0.016863	0.652611	XP_015936061.1	receptor-like kinase TMK3	Arachis duranensis	-	-	-	-	-	-	-	-	-	-	-	-	-	-	-
1656D_20980_c0_g1_i1	901	1656C;1656D	46.3228	359.18	46	359	4.25937	33.5814	191.028	49.6857	332.369	6.68944	2.74189	0.00319222	0.24195	XP_009399245.1	PREDICTED: CASP-like protein 1D1	Musa acuminata subsp. malaccensis	M0SUH2	CASP-like protein	103983700	Musa acuminata subsp. malaccensis (Wild banana) (Musa malaccensis)	-	103983700	-	-	integral component of membrane [GO:0016021]; plasma membrane [GO:0005886]	GO:0005886; GO:0016021	-	integral component of membrane [GO:0016021]; plasma membrane [GO:0005886]	-	SUBCELLULAR LOCATION: Cell membrane {ECO:0000256|RuleBase:RU361233, ECO:0000256|SAAS:SAAS00074706}; Multi-pass membrane protein {ECO:0000256|RuleBase:RU361233, ECO:0000256|SAAS:SAAS00074706}.	mus:103983700;
1656D_20997_c0_g2_i1	800	1656C;1656D	1535	483	1535	483	168.868	53.8879	1052.58	1657.99	447.171	0.269707	-1.89054	0.0188977	0.682418	ABK22392.1	unknown	Picea sitchensis	A9NP31	Uncharacterized protein	-	Picea sitchensis (Sitka spruce) (Pinus sitchensis)	-	-	-	-	-	-	-	-	-	-	-
1656D_21001_c0_g1_i1	1104	1656C;1656D	586	149	586	149	40.4968	10.5065	385.45	632.952	137.947	0.217942	-2.19798	0.00863534	0.449339	XP_020243866.1	transcription termination factor MTEF1, chloroplastic	Asparagus officinalis	-	-	-	-	-	-	-	-	-	-	-	-	-	-	-
1656D_21192_c0_g1_i1	514	1656C;1656D	1	19	1	19	0.235217	4.51489	9.33535	1.08012	17.5906	16.2857	4.02554	0.0435124	0.954003	-	-	-	-	-	-	-	-	-	-	-	-	-	-	-	-	-	-
1656D_21377_c0_g1_i1	973	1656C;1656D	34.5536	5.59449	35	6	2.8438	0.468918	21.6796	37.8043	5.55492	0.146939	-2.76671	0.0482993	1	PIA55374.1	hypothetical protein AQUCO_00800259v1	Aquilegia coerulea	A0A2G5EHW3	Uncharacterized protein	AQUCO_00800259v1	Aquilegia coerulea (Rocky mountain columbine)	-	-	-	-	nucleic acid binding [GO:0003676]; zinc ion binding [GO:0008270]	GO:0003676; GO:0008270	-	-	nucleic acid binding [GO:0003676]; zinc ion binding [GO:0008270]	-	-
1656D_21533_c0_g1_i1	820	1656C;1656D	56	771	56	771	5.93022	82.8597	387.147	60.4869	713.807	11.801	3.56084	6.47328e-05	0.0149861	XP_020260388.1	transcription factor DIVARICATA-like	Asparagus officinalis	-	-	-	-	-	-	-	-	-	-	-	-	-	-	-
1656D_21647_c0_g1_i1	386	1656C;1656D	1	18	1	18	0.387766	7.28186	8.87244	1.08012	16.6648	15.4286	3.94753	0.0494701	1	-	-	-	-	-	-	-	-	-	-	-	-	-	-	-	-	-	-
1656D_2165_c0_g1_i1	669	1656C;1656D	34	1	34	1	5.00146	0.148628	18.825	36.7242	0.92582	0.0252101	-5.30986	0.00346085	0.256326	XP_020276710.1	transcription repressor OFP3-like	Asparagus officinalis	-	-	-	-	-	-	-	-	-	-	-	-	-	-	-
1656D_21770_c0_g1_i1	248	1656C;1656D	14	1	14	1	11.0153	0.834651	8.02377	15.1217	0.92582	0.0612245	-4.02975	0.0468499	1	-	-	-	-	-	-	-	-	-	-	-	-	-	-	-	-	-	-
1656D_21900_c0_g1_i1	757	1656C;1656D	61	3	61	3	7.32202	0.364668	34.3325	65.8875	2.77746	0.0421546	-4.56817	0.00172268	0.159212	XP_020247647.1	GDSL esterase/lipase At1g71691-like	Asparagus officinalis	-	-	-	-	-	-	-	-	-	-	-	-	-	-	-
1656D_21941_c1_g1_i1	795	1656C;1656D	55	2	55	2	6.11018	0.225298	30.6292	59.4068	1.85164	0.0311688	-5.00375	0.00130386	0.132011	-	-	-	-	-	-	-	-	-	-	-	-	-	-	-	-	-	-
1656D_21944_c1_g1_i1	322	1656C;1656D	1	19	1	19	0.515097	10.3623	9.33535	1.08012	17.5906	16.2857	4.02554	0.0435124	0.954003	-	-	-	-	-	-	-	-	-	-	-	-	-	-	-	-	-	-
1656D_2195_c0_g1_i1	493	1656C;1656D	4	64	4	64	1.01746	16.4537	31.7865	4.32049	59.2525	13.7143	3.77761	0.00732463	0.40915	-	-	-	-	-	-	-	-	-	-	-	-	-	-	-	-	-	-
1656D_22135_c0_g1_i1	583	1656C;1656D	21	1	21	1	3.93221	0.18857	11.8042	22.6826	0.92582	0.0408163	-4.61471	0.0162553	0.634193	XP_026291904.1	uncharacterized protein LOC113216369	Frankliniella occidentalis	-	-	-	-	-	-	-	-	-	-	-	-	-	-	-
1656D_22334_c0_g1_i1	788	1656C;1656D	66	2	66	2	7.43459	0.228393	36.5699	71.2881	1.85164	0.025974	-5.26679	0.000583963	0.0770564	-	-	-	-	-	-	-	-	-	-	-	-	-	-	-	-	-	-
1656D_22375_c0_g1_i1	599	1656C;1656D	1	28	1	28	0.178324	5.03304	13.5015	1.08012	25.923	24	4.58496	0.0154896	0.61638	-	-	-	-	-	-	-	-	-	-	-	-	-	-	-	-	-	-
1656D_22416_c0_g1_i1	679	1656C;1656D	8	61	8	61	1.14796	8.84402	32.558	8.64099	56.475	6.53571	2.70834	0.0369488	0.916753	EOX97068.1	Uncharacterized protein TCM_006175	Theobroma cacao	A0A061E467	Uncharacterized protein	TCM_006175	Theobroma cacao (Cacao) (Cocoa)	-	-	-	-	integral component of membrane [GO:0016021]	GO:0016021	-	integral component of membrane [GO:0016021]	-	-	-
1656D_22420_c0_g1_i2	1234	1656C;1656D	43	248.845	43	249	2.56375	15.1591	138.487	46.4453	230.529	4.96346	2.31134	0.01629	0.634902	ONK62159.1	uncharacterized protein A4U43_C07F1000	Asparagus officinalis	-	-	-	-	-	-	-	-	-	-	-	-	-	-	-
1656D_22450_c0_g1_i1	484	1656C;1656D	1	45	1	45	0.263053	11.9713	21.371	1.08012	41.6619	38.5714	5.26946	0.0033122	0.248301	-	-	-	-	-	-	-	-	-	-	-	-	-	-	-	-	-	-
1656D_22593_c0_g1_i1	987	1656C;1656D	73	17	73	17	5.88785	1.39674	47.294	78.849	15.7389	0.199609	-2.32475	0.0480028	1	XP_020679848.1	uncharacterized protein LOC110097679	Dendrobium catenatum	-	-	-	-	-	-	-	-	-	-	-	-	-	-	-
1656D_2265_c0_g1_i1	821	1656C;1656D	230	33	230	33	24.3107	3.53999	139.49	248.428	30.5521	0.122981	-3.02349	0.00225716	0.19187	NP_739614.1	cytochrome c oxidase subunit III	Thrips imaginis	Q94XD8	Cytochrome c oxidase subunit 3	cox3	Thrips imaginis (Plague thrips)	-	cox3	-	-	integral component of membrane [GO:0016021]; mitochondrion [GO:0005739]; cytochrome-c oxidase activity [GO:0004129]; aerobic electron transport chain [GO:0019646]	GO:0004129; GO:0005739; GO:0016021; GO:0019646	aerobic electron transport chain [GO:0019646]	integral component of membrane [GO:0016021]; mitochondrion [GO:0005739]	cytochrome-c oxidase activity [GO:0004129]	-	-
1656D_22696_c0_g1_i1	609	1656C;1656D	23	3.44816	23	3	3.98577	0.601837	13.8101	24.8428	2.77746	0.111801	-3.16099	0.0480215	1	-	-	-	-	-	-	-	-	-	-	-	-	-	-	-	-	-	-
1656D_22718_c1_g1_i1	1213	1656C;1656D	5	51	5	51	0.30487	3.17664	26.3087	5.40062	47.2168	8.74286	3.1281	0.0250559	0.779547	-	-	-	-	-	-	-	-	-	-	-	-	-	-	-	-	-	-
1656D_22783_c0_g1_i1	1094	1656C;1656D	112.569	437.048	113	437	7.87572	31.1957	263.319	122.054	404.583	3.31479	1.72892	0.0431546	0.952121	XP_020265324.1	uncharacterized protein LOC109840906	Asparagus officinalis	-	-	-	-	-	-	-	-	-	-	-	-	-	-	-
1656D_22815_c0_g1_i1	759	1656C;1656D	38	4	38	4	4.54195	0.484201	22.374	41.0447	3.70328	0.0902256	-3.47032	0.0176485	0.658309	YP_009026407.1	RNA dependent RNA polymerase	Arhar cryptic virus-I	W1I6K0	RNA dependent RNA polymerase	RdRp	Arhar cryptic virus-I	-	RdRp	-	-	RNA binding [GO:0003723]; RNA-directed 5'-3' RNA polymerase activity [GO:0003968]; transcription, DNA-templated [GO:0006351]; viral RNA genome replication [GO:0039694]	GO:0003723; GO:0003968; GO:0006351; GO:0039694	transcription, DNA-templated [GO:0006351]; viral RNA genome replication [GO:0039694]	-	RNA binding [GO:0003723]; RNA-directed 5'-3' RNA polymerase activity [GO:0003968]	-	vg:18995882;
1656D_22818_c0_g1_i1	1979	1656C;1656D	242.097	59.8935	242	60	8.07937	2.04994	158.47	261.39	55.5492	0.212515	-2.23437	0.016782	0.650131	XP_010937050.1	PREDICTED: putative laccase-9	Elaeis guineensis	-	-	-	-	-	-	-	-	-	-	-	-	-	-	-
1656D_22818_c0_g2_i1	1468	1656C;1656D	31.9027	4.1065	32	4	1.52528	0.20094	19.1336	34.564	3.70328	0.107143	-3.22239	0.0301437	0.838624	XP_010937050.1	PREDICTED: putative laccase-9	Elaeis guineensis	-	-	-	-	-	-	-	-	-	-	-	-	-	-	-
1656D_22865_c0_g1_i1	726	1656C;1656D	1	26	1	26	0.128369	3.37822	12.5757	1.08012	24.0713	22.2857	4.47805	0.0191637	0.688808	KRH18879.1	hypothetical protein GLYMA_13G087400	Glycine max	A0A0R0GWX1	Uncharacterized protein	100794312 GLYMA_13G087400	Glycine max (Soybean) (Glycine hispida)	-	100794312	-	-	actin filament binding [GO:0051015]; actin filament organization [GO:0007015]	GO:0007015; GO:0051015	actin filament organization [GO:0007015]	-	actin filament binding [GO:0051015]	-	-
1656D_22883_c0_g1_i1	406	1656C;1656D	19	155	19	155	6.77609	57.2411	82.0122	20.5223	143.502	6.99248	2.8058	0.00996973	0.492189	KQJ83044.1	hypothetical protein BRADI_5g12781v3	Brachypodium distachyon	A0A0Q3E9I5	Uncharacterized protein	BRADI_5g12781v3	Brachypodium distachyon (Purple false brome) (Trachynia distachya)	-	-	-	-	-	-	-	-	-	-	-
1656D_22973_c1_g1_i1	713	1656C;1656D	1	25	1	25	0.132223	3.34538	12.1128	1.08012	23.1455	21.4286	4.42146	0.021391	0.717393	-	-	-	-	-	-	-	-	-	-	-	-	-	-	-	-	-	-
1656D_23004_c0_g1_i1	466	1656C;1656D	18	1	18	1	5.06602	0.285714	10.184	19.4422	0.92582	0.047619	-4.39232	0.0249422	0.777278	-	-	-	-	-	-	-	-	-	-	-	-	-	-	-	-	-	-
1656D_23146_c2_g1_i1	216	1656C;1656D	24	1	24	1	24.077	1.05755	13.4244	25.923	0.92582	0.0357143	-4.80735	0.010921	0.512228	-	-	-	-	-	-	-	-	-	-	-	-	-	-	-	-	-	-
1656D_23195_c0_g1_i1	776	1656C;1656D	16	1	16	1	1.84634	0.11695	9.1039	17.282	0.92582	0.0535714	-4.22239	0.0338303	0.861749	-	-	-	-	-	-	-	-	-	-	-	-	-	-	-	-	-	-
1656D_232_c0_g1_i1	623	1656C;1656D	176	25	176	25	29.2986	4.19176	106.624	190.102	23.1455	0.121753	-3.03797	0.00352545	0.256326	XP_020266650.1	antifungal protein ginkbilobin-2-like	Asparagus officinalis	-	-	-	-	-	-	-	-	-	-	-	-	-	-	-
1656D_23221_c0_g1_i1	501	1656C;1656D	202	16	202	16	49.8464	3.98723	116.499	218.185	14.8131	0.0678925	-3.8806	0.00030387	0.0474169	-	-	-	-	-	-	-	-	-	-	-	-	-	-	-	-	-	-
1656D_23231_c2_g1_i1	682	1656C;1656D	30	3	30	3	4.27271	0.431811	17.5906	32.4037	2.77746	0.0857143	-3.54432	0.0226433	0.738718	AQP25675.1	MYB transcription factor	Allium cepa	A0A1S5VIF0	MYB transcription factor	MYB29	Allium cepa (Onion)	-	MYB29	-	-	DNA binding [GO:0003677]	GO:0003677	-	-	DNA binding [GO:0003677]	-	-
1656D_23328_c0_g1_i1	1175	1656C;1656D	11	87	11	87	0.69941	5.64872	46.2139	11.8814	80.5463	6.77922	2.76112	0.0232968	0.754921	ALT06564.1	abscisic acid insensitive 5 binding protein-like protein	Gladiolus x hybridus	A0A0U3A2U0	Abscisic acid insensitive 5 binding protein-like protein	-	Gladiolus x hybridus	-	-	-	-	signal transduction [GO:0007165]	GO:0007165	signal transduction [GO:0007165]	-	-	-	-
1656D_23330_c0_g2_i1	1155	1656C;1656D	395.308	2137.17	395	2137	25.7138	141.929	1202.56	426.649	1978.48	4.63725	2.21327	0.00676388	0.390298	XP_020275508.1	uncharacterized protein LOC109850023	Asparagus officinalis	-	-	-	-	-	-	-	-	-	-	-	-	-	-	-
1656D_23368_c0_g1_i1	1125	1656C;1656D	10076	1707	10076	1707	678.878	117.38	6231.85	10883.3	1580.37	0.145211	-2.78378	0.00480004	0.3124	XP_010933649.1	PREDICTED: probable aquaporin TIP2-1	Elaeis guineensis	-	-	-	-	-	-	-	-	-	-	-	-	-	-	-
1656D_23379_c0_g1_i1	2422	1656C;1656D	282	52	282	52	7.45843	1.41191	176.369	304.595	48.1426	0.158055	-2.6615	0.00442691	0.298305	XP_020247068.1	glucomannan 4-beta-mannosyltransferase 9-like	Asparagus officinalis	-	-	-	-	-	-	-	-	-	-	-	-	-	-	-
1656D_23413_c0_g1_i1	727	1656C;1656D	30	232	30	232	3.84271	30.0769	123.597	32.4037	214.79	6.62857	2.7287	0.0064294	0.3754	XP_020254099.1	probable calcium-binding protein CML30	Asparagus officinalis	-	-	-	-	-	-	-	-	-	-	-	-	-	-	-
1656D_23448_c0_g2_i1	708	1656C;1656D	120	21	120	21	16.0532	2.84252	74.5285	129.615	19.4422	0.15	-2.73697	0.0127843	0.558783	XP_020256557.1	nuclear transport factor 2-like	Asparagus officinalis	-	-	-	-	-	-	-	-	-	-	-	-	-	-	-
1656D_23584_c0_g1_i1	483	1656C;1656D	14	1	14	1	3.69367	0.267082	8.02377	15.1217	0.92582	0.0612245	-4.02975	0.0468499	1	-	-	-	-	-	-	-	-	-	-	-	-	-	-	-	-	-	-
1656D_23588_c0_g1_i1	954	1656C;1656D	5	42	5	42	0.423225	3.61865	22.1425	5.40062	38.8844	7.2	2.848	0.0452302	0.981237	-	-	-	-	-	-	-	-	-	-	-	-	-	-	-	-	-	-
1656D_23618_c0_g1_i1	575	1656C;1656D	1	24	1	24	0.191816	4.64279	11.6499	1.08012	22.2197	20.5714	4.36257	0.0239372	0.767531	-	-	-	-	-	-	-	-	-	-	-	-	-	-	-	-	-	-
1656D_23643_c0_g2_i1	595	1656C;1656D	70.5111	12.5929	71	13	12.723	2.29051	44.3622	76.6888	12.0357	0.156942	-2.6717	0.0272658	0.796061	ONK63617.1	uncharacterized protein A4U43_C07F17130	Asparagus officinalis	-	-	-	-	-	-	-	-	-	-	-	-	-	-	-
1656D_23756_c0_g1_i1	2075	1656C;1656D	4	357	4	357	0.126323	11.5658	167.419	4.32049	330.518	76.5	6.25739	1.69257e-07	0.000144506	PNY17392.1	Ty3/gypsy retrotransposon protein	Trifolium pratense	A0A2K3PQ22	Ty3/gypsy retrotransposon protein	L195_g014134	Trifolium pratense (Red clover)	-	-	-	-	nucleic acid binding [GO:0003676]; DNA integration [GO:0015074]	GO:0003676; GO:0015074	DNA integration [GO:0015074]	-	nucleic acid binding [GO:0003676]	-	-
1656D_23782_c0_g1_i1	595	1656C;1656D	3	33	3	33	0.54132	6.00235	16.8962	3.24037	30.5521	9.42857	3.23704	0.0380653	0.935015	-	-	-	-	-	-	-	-	-	-	-	-	-	-	-	-	-	-
1656D_23789_c1_g1_i1	503	1656C;1656D	151	1	151	1	36.9849	0.247468	82.0122	163.099	0.92582	0.00567644	-7.4608	1.44955e-06	0.000775253	XP_008785888.1	PREDICTED: 36.4 kDa proline-rich protein-like	Phoenix dactylifera	A0A2H3XMD2	36.4 kDa proline-rich protein-like	LOC103704398	Phoenix dactylifera (Date palm)	-	LOC103704398	-	-	structural constituent of cell wall [GO:0005199]	GO:0005199	-	-	structural constituent of cell wall [GO:0005199]	-	pda:103704398;
1656D_23819_c0_g1_i1	550	1656C;1656D	18	1	18	1	3.74309	0.209779	10.184	19.4422	0.92582	0.047619	-4.39232	0.0249422	0.777278	-	-	-	-	-	-	-	-	-	-	-	-	-	-	-	-	-	-
1656D_23897_c0_g1_i1	463	1656C;1656D	25	3	25	3	7.11486	0.868001	14.8903	27.0031	2.77746	0.102857	-3.28129	0.0383294	0.936879	XP_026275795.1	eukaryotic initiation factor 4A-I isoform X1	Frankliniella occidentalis	-	-	-	-	-	-	-	-	-	-	-	-	-	-	-
1656D_24030_c1_g1_i1	1466	1656C;1656D	34	1114	34	1114	1.62831	54.6022	534.044	36.7242	1031.36	28.084	4.81168	2.53091e-07	0.000195829	XP_020252992.1	putative 12-oxophytodienoate reductase 11 isoform X1	Asparagus officinalis	-	-	-	-	-	-	-	-	-	-	-	-	-	-	-
1656D_24079_c0_g1_i1	797	1656C;1656D	1	48	1	48	0.110659	5.3863	22.7597	1.08012	44.4394	41.1429	5.36257	0.00261094	0.211834	-	-	-	-	-	-	-	-	-	-	-	-	-	-	-	-	-	-
1656D_24152_c0_g1_i1	568	1656C;1656D	15	1	15	1	2.94279	0.197734	8.56384	16.2019	0.92582	0.0571429	-4.12928	0.0396939	0.945471	KNA02799.1	hypothetical protein SOVF_215240, partial	Spinacia oleracea	A0A0K9Q6U6	Uncharacterized protein (Fragment)	SOVF_215240	Spinacia oleracea (Spinach)	-	-	-	-	-	-	-	-	-	-	-
1656D_24164_c0_g1_i1	362	1656C;1656D	15	1	15	1	6.42339	0.451438	8.56384	16.2019	0.92582	0.0571429	-4.12928	0.0396939	0.945471	XP_020246595.1	DNA replication licensing factor MCM2	Asparagus officinalis	-	-	-	-	-	-	-	-	-	-	-	-	-	-	-
1656D_24269_c0_g1_i1	794	1656C;1656D	1	42	1	42	0.111313	4.74044	19.9823	1.08012	38.8844	36	5.16993	0.00423613	0.287694	-	-	-	-	-	-	-	-	-	-	-	-	-	-	-	-	-	-
1656D_24385_c1_g1_i1	775	1656C;1656D	31	1	31	1	3.5846	0.117186	17.2048	33.4838	0.92582	0.0276498	-5.17659	0.00477561	0.310986	XP_026278027.1	high mobility group-T protein-like	Frankliniella occidentalis	-	-	-	-	-	-	-	-	-	-	-	-	-	-	-
1656D_24399_c0_g1_i1	680	1656C;1656D	1	73	1	73	0.143131	10.5575	34.3325	1.08012	67.5849	62.5714	5.96743	0.00046108	0.0641745	XP_009386180.1	PREDICTED: NDR1/HIN1-like protein 12	Musa acuminata subsp. malaccensis	M0U751	Uncharacterized protein	103973360	Musa acuminata subsp. malaccensis (Wild banana) (Musa malaccensis)	-	103973360	-	-	integral component of membrane [GO:0016021]; plasma membrane [GO:0005886]; plasmodesma [GO:0009506]	GO:0005886; GO:0009506; GO:0016021	-	integral component of membrane [GO:0016021]; plasma membrane [GO:0005886]; plasmodesma [GO:0009506]	-	-	mus:103973360;
1656D_24519_c1_g1_i1	460	1656C;1656D	14	1	14	1	4.02775	0.292834	8.02377	15.1217	0.92582	0.0612245	-4.02975	0.0468499	1	ONK73384.1	uncharacterized protein A4U43_C04F30900	Asparagus officinalis	-	-	-	-	-	-	-	-	-	-	-	-	-	-	-
1656D_24610_c1_g1_i1	1351	1656C;1656D	5807	1800	5807	1800	308.159	97.688	3969.38	6272.28	1666.48	0.265689	-1.91219	0.0320744	0.861749	XP_020268635.1	photosynthetic NDH subunit of subcomplex B 2, chloroplastic	Asparagus officinalis	-	-	-	-	-	-	-	-	-	-	-	-	-	-	-
1656D_24643_c0_g1_i1	879	1656C;1656D	37	1	37	1	3.52854	0.0969202	20.4452	39.9646	0.92582	0.023166	-5.43185	0.00254597	0.208741	CAN66999.1	hypothetical protein VITISV_019171, partial	Vitis vinifera	A5APR7	Uncharacterized protein (Fragment)	VITISV_019171	Vitis vinifera (Grape)	-	-	-	-	-	-	-	-	-	-	-
1656D_24652_c0_g1_i1	641	1656C;1656D	27	3	27	3	4.27486	0.478867	15.9704	29.1633	2.77746	0.0952381	-3.39232	0.0308703	0.85112	-	-	-	-	-	-	-	-	-	-	-	-	-	-	-	-	-	-
1656D_24672_c0_g1_i1	617	1656C;1656D	3	37	3	37	0.507882	6.30911	18.7479	3.24037	34.2553	10.5714	3.4021	0.0274311	0.799823	-	-	-	-	-	-	-	-	-	-	-	-	-	-	-	-	-	-
1656D_24708_c0_g1_i1	692	1656C;1656D	6	160	6	160	0.833768	22.4829	77.306	6.48074	148.131	22.8571	4.51457	0.00025165	0.041873	XP_007226107.1	uncharacterized protein LOC18788581	Prunus persica	M5XP63	Uncharacterized protein	PRUPE_1G578700 PRUPE_ppa010943mg	Prunus persica (Peach) (Amygdalus persica)	-	-	-	-	integral component of membrane [GO:0016021]	GO:0016021	-	integral component of membrane [GO:0016021]	-	-	pper:18788581;
1656D_24712_c0_g1_i1	640	1656C;1656D	36	2	36	2	5.71584	0.320123	20.368	38.8844	1.85164	0.047619	-4.39232	0.00671504	0.388061	XP_010928162.1	PREDICTED: probable protein phosphatase 2C 66	Elaeis guineensis	-	-	-	-	-	-	-	-	-	-	-	-	-	-	-
1656D_24934_c0_g1_i1	378	1656C;1656D	19	1	19	1	7.61448	0.419586	10.7241	20.5223	0.92582	0.0451128	-4.47032	0.0215513	0.717393	-	-	-	-	-	-	-	-	-	-	-	-	-	-	-	-	-	-
1656D_25161_c0_g3_i1	551	1656C;1656D	4	37.0239	4	37	0.829084	7.7405	19.2879	4.32049	34.2553	7.92857	2.98706	0.0439077	0.961029	XP_008782086.1	PREDICTED: protein GLUTAMINE DUMPER 2-like	Phoenix dactylifera	A0A2H3XDB5	protein GLUTAMINE DUMPER 2-like	LOC103701698	Phoenix dactylifera (Date palm)	-	LOC103701698	-	-	integral component of membrane [GO:0016021]	GO:0016021	-	integral component of membrane [GO:0016021]	-	-	pda:103701698;
1656D_25250_c0_g2_i1	399	1656C;1656D	1	23	1	23	0.367336	8.77937	11.187	1.08012	21.2939	19.7143	4.30117	0.0268439	0.789742	-	-	-	-	-	-	-	-	-	-	-	-	-	-	-	-	-	-
1656D_25307_c0_g1_i1	694	1656C;1656D	98	18	98	18	13.5515	2.51717	61.2584	105.852	16.6648	0.157434	-2.66718	0.0191416	0.688808	XP_024928204.1	fatty-acid-binding protein 1-like	Ziziphus jujuba	-	-	-	-	-	-	-	-	-	-	-	-	-	-	-
1656D_25389_c1_g1_i1	1752	1656C;1656D	8	83	8	83	0.308343	3.27848	42.742	8.64099	76.8431	8.89286	3.15265	0.0127654	0.558168	XP_020256747.1	uncharacterized protein LOC109833479 isoform X1	Asparagus officinalis	-	-	-	-	-	-	-	-	-	-	-	-	-	-	-
1656D_2541_c0_g1_i1	529	1656C;1656D	2	32	2	32	0.445991	7.21594	15.8932	2.16025	29.6262	13.7143	3.77761	0.0231738	0.751145	XP_010916703.1	PREDICTED: uncharacterized protein LOC105041428	Elaeis guineensis	-	-	-	-	-	-	-	-	-	-	-	-	-	-	-
1656D_25451_c0_g1_i1	1464	1656C;1656D	272	30	272	30	13.0486	1.47292	160.784	293.794	27.7746	0.0945378	-3.40296	0.000553058	0.0736913	XP_020273999.1	acyl transferase 4-like	Asparagus officinalis	-	-	-	-	-	-	-	-	-	-	-	-	-	-	-
1656D_25492_c0_g2_i1	238	1656C;1656D	29	4	29	4	24.4586	3.59081	17.5134	31.3236	3.70328	0.118227	-3.08037	0.0400953	0.945471	-	-	-	-	-	-	-	-	-	-	-	-	-	-	-	-	-	-
1656D_25537_c0_g1_i1	559	1656C;1656D	1	25	1	25	0.201806	5.0888	12.1128	1.08012	23.1455	21.4286	4.42146	0.021391	0.717393	-	-	-	-	-	-	-	-	-	-	-	-	-	-	-	-	-	-
1656D_25570_c0_g1_i2	1580	1656C;1656D	13.95	108.508	14	109	0.609189	4.85253	58.0181	15.1217	100.914	6.67347	2.73844	0.0185533	0.672942	XP_020261495.1	DNA repair protein recA homolog 3, mitochondrial	Asparagus officinalis	-	-	-	-	-	-	-	-	-	-	-	-	-	-	-
1656D_25579_c0_g1_i1	1166	1656C;1656D	82	13	82	13	5.26716	0.852623	50.3029	88.5701	12.0357	0.135889	-2.8795	0.0160406	0.628788	ONK76007.1	uncharacterized protein A4U43_C03F22860	Asparagus officinalis	-	-	-	-	-	-	-	-	-	-	-	-	-	-	-
1656D_25585_c0_g1_i1	800	1656C;1656D	57	4	57	4	6.27068	0.446277	32.6352	61.567	3.70328	0.0601504	-4.05528	0.00404812	0.280021	XP_020243988.1	probable serine/threonine-protein kinase PBL19	Asparagus officinalis	-	-	-	-	-	-	-	-	-	-	-	-	-	-	-
1656D_25640_c0_g1_i1	565	1656C;1656D	26	3	26	3	5.14928	0.599005	15.4303	28.0832	2.77746	0.0989011	-3.33787	0.0343618	0.865768	XP_020250172.1	myb-related protein Myb4-like	Asparagus officinalis	-	-	-	-	-	-	-	-	-	-	-	-	-	-	-
1656D_25769_c0_g1_i1	647	1656C;1656D	24	1	24	1	3.73887	0.157101	13.4244	25.923	0.92582	0.0357143	-4.80735	0.010921	0.512228	XP_026292246.1	cofilin/actin-depolymerizing factor homolog	Frankliniella occidentalis	-	-	-	-	-	-	-	-	-	-	-	-	-	-	-
1656D_25819_c0_g1_i1	542	1656C;1656D	7	55	7	55	1.49359	11.8572	29.2405	7.56086	50.9201	6.73469	2.75161	0.0386051	0.941468	XP_020243416.1	uncharacterized protein LOC109821658	Asparagus officinalis	-	-	-	-	-	-	-	-	-	-	-	-	-	-	-
1656D_26059_c1_g1_i1	485	1656C;1656D	17	1	17	1	4.45495	0.264984	9.64396	18.3621	0.92582	0.0504202	-4.30986	0.0289824	0.813831	-	-	-	-	-	-	-	-	-	-	-	-	-	-	-	-	-	-
1656D_2606_c0_g1_i1	600	1656C;1656D	43	5	43	5	7.64688	0.89617	25.5372	46.4453	4.6291	0.0996678	-3.32673	0.0179139	0.658309	-	-	-	-	-	-	-	-	-	-	-	-	-	-	-	-	-	-
1656D_26078_c0_g1_i1	591	1656C;1656D	38	6	38	6	6.94196	1.10471	23.2998	41.0447	5.55492	0.135338	-2.88536	0.0379301	0.933482	XP_008777743.1	PREDICTED: uncharacterized protein LOC103697615	Phoenix dactylifera	A0A2H3X3G5	uncharacterized protein LOC103697615	LOC103697615	Phoenix dactylifera (Date palm)	-	LOC103697615	-	-	-	-	-	-	-	-	pda:103697615;
1656D_26081_c0_g1_i1	307	1656C;1656D	20	2	20	2	11.0859	1.17345	11.7271	21.6025	1.85164	0.0857143	-3.54432	0.0399296	0.945471	-	-	-	-	-	-	-	-	-	-	-	-	-	-	-	-	-	-
1656D_26135_c0_g1_i1	608	1656C;1656D	11	85	11	85	1.91153	14.8789	45.288	11.8814	78.6947	6.62338	2.72757	0.0253089	0.785105	-	-	-	-	-	-	-	-	-	-	-	-	-	-	-	-	-	-
1656D_26194_c0_g1_i1	2224	1656C;1656D	269	62.5674	269	63	7.8418	1.87175	174.44	290.553	58.3267	0.200743	-2.31657	0.0120739	0.546446	XP_020262874.1	fimbrin-2-like	Asparagus officinalis	-	-	-	-	-	-	-	-	-	-	-	-	-	-	-
1656D_26209_c0_g1_i1	798	1656C;1656D	27	1	27	1	2.98194	0.111999	15.0446	29.1633	0.92582	0.031746	-4.97728	0.00754742	0.411271	-	-	-	-	-	-	-	-	-	-	-	-	-	-	-	-	-	-
1656D_26215_c0_g1_i1	753	1656C;1656D	6	53	6	53	0.726375	6.49675	27.7746	6.48074	49.0685	7.57143	2.92057	0.0317219	0.861749	-	-	-	-	-	-	-	-	-	-	-	-	-	-	-	-	-	-
1656D_26233_c0_g1_i1	2675	1656C;1656D	219	11	219	11	5.17856	0.26714	123.366	236.547	10.184	0.0430528	-4.53775	4.248e-05	0.0109053	XP_020266870.1	TPR repeat-containing thioredoxin TTL1-like	Asparagus officinalis	-	-	-	-	-	-	-	-	-	-	-	-	-	-	-
1656D_26240_c0_g1_i1	866	1656C;1656D	78	6	78	6	7.6055	0.59439	44.9023	84.2496	5.55492	0.0659341	-3.92283	0.00271857	0.21764	-	-	-	-	-	-	-	-	-	-	-	-	-	-	-	-	-	-
1656D_26245_c0_g1_i1	900	1656C;1656D	825	78	825	78	75.9822	7.30432	481.658	891.102	72.214	0.081039	-3.62524	3.70498e-05	0.00979421	XP_020583785.1	dirigent protein 22-like	Phalaenopsis equestris	-	-	-	-	-	-	-	-	-	-	-	-	-	-	-
1656D_26247_c0_g1_i1	326	1656C;1656D	288	16	288	16	145.282	8.58061	162.944	311.076	14.8131	0.047619	-4.39232	2.4952e-05	0.00718829	-	-	-	-	-	-	-	-	-	-	-	-	-	-	-	-	-	-
1656D_26271_c0_g1_i1	344	1656C;1656D	46	5	46	5	21.3651	2.45932	27.1574	49.6857	4.6291	0.0931677	-3.42403	0.0142177	0.596992	-	-	-	-	-	-	-	-	-	-	-	-	-	-	-	-	-	-
1656D_26293_c0_g1_i1	1563	1656C;1656D	29	142	29	142	1.28328	6.43439	81.395	31.3236	131.466	4.19704	2.06937	0.0494315	1	XP_020255403.1	type I inositol polyphosphate 5-phosphatase 10 isoform X1	Asparagus officinalis	-	-	-	-	-	-	-	-	-	-	-	-	-	-	-
1656D_26312_c1_g1_i1	389	1656C;1656D	21	1	21	1	8.04014	0.399099	11.8042	22.6826	0.92582	0.0408163	-4.61471	0.0162553	0.634193	AGZ20212.1	FT6	Allium cepa	U5U9L1	FT6	-	Allium cepa (Onion)	-	-	-	-	-	-	-	-	-	-	-
1656D_26339_c0_g1_i1	1864	1656C;1656D	54.8514	3.60944	55	4	1.964	0.1325	31.555	59.4068	3.70328	0.0623377	-4.00375	0.0046617	0.308747	XP_020273787.1	uncharacterized protein LOC109848604 isoform X1	Asparagus officinalis	-	-	-	-	-	-	-	-	-	-	-	-	-	-	-
1656D_26347_c0_g1_i1	845	1656C;1656D	5	46.1192	5	46	0.505773	4.73818	23.9942	5.40062	42.5877	7.88571	2.97924	0.034586	0.869519	-	-	-	-	-	-	-	-	-	-	-	-	-	-	-	-	-	-
1656D_26417_c0_g2_i1	1256	1656C;1656D	5	72.3624	5	72	0.291343	4.30893	36.0298	5.40062	66.659	12.3429	3.6256	0.00746858	0.40915	-	-	-	-	-	-	-	-	-	-	-	-	-	-	-	-	-	-
1656D_26433_c0_g1_i1	1451	1656C;1656D	147	24	147	24	7.13074	1.1914	90.4989	158.778	22.2197	0.139942	-2.8371	0.00764198	0.415639	XP_020244259.1	probable protein kinase At2g41970	Asparagus officinalis	-	-	-	-	-	-	-	-	-	-	-	-	-	-	-
1656D_26491_c0_g1_i1	1695	1656C;1656D	61	13	61	13	2.44629	0.534164	38.9616	65.8875	12.0357	0.18267	-2.45269	0.0453238	0.982529	XP_020246348.1	DNA (cytosine-5)-methyltransferase CMT3-like	Asparagus officinalis	-	-	-	-	-	-	-	-	-	-	-	-	-	-	-
1656D_26491_c2_g1_i1	864	1656C;1656D	54	9	54	9	5.2836	0.894631	33.3295	58.3267	8.33238	0.142857	-2.80735	0.0290452	0.815001	OAY70010.1	DNA (cytosine-5)-methyltransferase 1	Ananas comosus	A0A199UZD6	DNA (Cytosine-5)-methyltransferase 1	ACMD2_06578	Ananas comosus (Pineapple) (Ananas ananas)	-	-	-	-	nucleus [GO:0005634]; chromatin binding [GO:0003682]; methyltransferase activity [GO:0008168]	GO:0003682; GO:0005634; GO:0008168	-	nucleus [GO:0005634]	chromatin binding [GO:0003682]; methyltransferase activity [GO:0008168]	SUBCELLULAR LOCATION: Nucleus {ECO:0000256|SAAS:SAAS00539527}.	-
1656D_26492_c1_g1_i1	568	1656C;1656D	1	23	1	23	0.196186	4.54788	11.187	1.08012	21.2939	19.7143	4.30117	0.0268439	0.789742	ONK70676.1	uncharacterized protein A4U43_C04F350	Asparagus officinalis	-	-	-	-	-	-	-	-	-	-	-	-	-	-	-
1656D_26497_c0_g1_i2	3055	1656C;1656D	25.4499	240.411	25	240	0.519186	5.03935	124.6	27.0031	222.197	8.22857	3.04064	0.00276727	0.220862	ONK65740.1	uncharacterized protein A4U43_C06F440	Asparagus officinalis	-	-	-	-	-	-	-	-	-	-	-	-	-	-	-
1656D_26525_c0_g1_i1	2725	1656C;1656D	95	706	95	706	2.20034	16.7951	378.12	102.612	653.629	6.36992	2.67128	0.0017992	0.164176	XP_020273539.1	probable boron transporter 2	Asparagus officinalis	-	-	-	-	-	-	-	-	-	-	-	-	-	-	-
1656D_26539_c0_g2_i1	1762	1656C;1656D	38	622	38	622	1.4547	24.4032	308.452	41.0447	575.86	14.0301	3.81045	3.63334e-05	0.00967121	XP_010939142.1	PREDICTED: UDP-glucose 6-dehydrogenase 5-like	Elaeis guineensis	-	-	-	-	-	-	-	-	-	-	-	-	-	-	-
1656D_26598_c0_g1_i1	1854	1656C;1656D	65	912	65	912	2.34223	33.6913	457.278	70.208	844.348	12.0264	3.58813	4.72156e-05	0.0119353	AAP88404.1	flavonoid glucosyl-transferase	Allium cepa	Q7XJ52	Glycosyltransferase (EC 2.4.1.-)	UGT73H1	Allium cepa (Onion)	-	UGT73H1	2.4.1.-	-	transferase activity, transferring hexosyl groups [GO:0016758]; metabolic process [GO:0008152]	GO:0008152; GO:0016758	metabolic process [GO:0008152]	-	transferase activity, transferring hexosyl groups [GO:0016758]	-	-
1656D_26602_c0_g2_i1	1463	1656C;1656D	140	572	140	572	6.72189	28.1073	340.393	151.217	529.569	3.50204	1.8082	0.0303617	0.843338	-	-	-	-	-	-	-	-	-	-	-	-	-	-	-	-	-	-
1656D_26619_c0_g1_i1	1091	1656C;1656D	16	92	16	92	1.12359	6.59106	51.2287	17.282	85.1754	4.92857	2.30117	0.048237	1	XP_010656394.1	PREDICTED: uncharacterized protein LOC104880653	Vitis vinifera	-	-	-	-	-	-	-	-	-	-	-	-	-	-	-
1656D_26813_c1_g1_i1	937	1656C;1656D	3	39	3	39	0.260575	3.44693	19.6737	3.24037	36.107	11.1429	3.47805	0.0234353	0.758133	-	-	-	-	-	-	-	-	-	-	-	-	-	-	-	-	-	-
1656D_26890_c0_g1_i1	753	1656C;1656D	51	7	51	7	6.17419	0.858061	30.7835	55.0863	6.48074	0.117647	-3.08746	0.0201885	0.717393	ONK78336.1	uncharacterized protein A4U43_C02F17480	Asparagus officinalis	-	-	-	-	-	-	-	-	-	-	-	-	-	-	-
1656D_26904_c0_g1_i1	1024	1656C;1656D	431	51	431	51	33.0177	3.98219	256.375	465.533	47.2168	0.101425	-3.30151	0.000306267	0.0476827	XP_010911772.1	PREDICTED: glutathione S-transferase U17-like	Elaeis guineensis	-	-	-	-	-	-	-	-	-	-	-	-	-	-	-
1656D_26945_c1_g1_i1	241	1656C;1656D	14	1	14	1	11.5338	0.878671	8.02377	15.1217	0.92582	0.0612245	-4.02975	0.0468499	1	OVA05215.1	hypothetical protein BVC80_8949g4	Macleaya cordata	A0A200Q430	Uncharacterized protein	BVC80_8949g4	Macleaya cordata	-	-	-	-	-	-	-	-	-	-	-
1656D_26955_c0_g1_i1	578	1656C;1656D	2	27	2	27	0.380069	5.1726	13.5787	2.16025	24.9971	11.5714	3.5325	0.0372168	0.920048	-	-	-	-	-	-	-	-	-	-	-	-	-	-	-	-	-	-
1656D_26971_c0_g1_i1	866	1656C;1656D	23	3	23	3	2.24265	0.297195	13.8101	24.8428	2.77746	0.111801	-3.16099	0.0480215	1	-	-	-	-	-	-	-	-	-	-	-	-	-	-	-	-	-	-
1656D_27004_c0_g1_i1	266	1656C;1656D	1	37	1	37	0.697829	27.4169	17.6677	1.08012	34.2553	31.7143	4.98706	0.00652067	0.378486	-	-	-	-	-	-	-	-	-	-	-	-	-	-	-	-	-	-
1656D_27030_c0_g1_i1	590	1656C;1656D	2	39	2	39	0.366552	7.20046	19.1336	2.16025	36.107	16.7143	4.06301	0.0126837	0.555437	BAL41418.1	endo-1,4-beta-glucanase	Allium sativum f. pekinense	H0NFP4	Endoglucanase (EC 3.2.1.4)	EGL2	Allium sativum f. pekinense	-	EGL2	3.2.1.4	-	cellulase activity [GO:0008810]; cellulose catabolic process [GO:0030245]	GO:0008810; GO:0030245	cellulose catabolic process [GO:0030245]	-	cellulase activity [GO:0008810]	-	-
1656D_27128_c0_g1_i1	565	1656C;1656D	30	2	30	2	5.94148	0.399337	17.1277	32.4037	1.85164	0.0571429	-4.12928	0.0123085	0.546446	-	-	-	-	-	-	-	-	-	-	-	-	-	-	-	-	-	-
1656D_27190_c1_g1_i1	294	1656C;1656D	16	1	16	1	9.45511	0.628173	9.1039	17.282	0.92582	0.0535714	-4.22239	0.0338303	0.861749	XP_019458861.1	PREDICTED: short-chain type dehydrogenase/reductase-like	Lupinus angustifolius	A0A1J7HS96	Uncharacterized protein	TanjilG_16464	Lupinus angustifolius (Narrow-leaved blue lupine)	-	-	-	-	oxidoreductase activity [GO:0016491]	GO:0016491	-	-	oxidoreductase activity [GO:0016491]	-	lang:109358842;
1656D_27287_c0_g1_i1	895	1656C;1656D	2	39	2	39	0.185714	3.68178	19.1336	2.16025	36.107	16.7143	4.06301	0.0126837	0.555437	CAN67819.1	hypothetical protein VITISV_041315	Vitis vinifera	A5BDX8	Uncharacterized protein	VITISV_041315	Vitis vinifera (Grape)	-	-	-	-	nucleic acid binding [GO:0003676]; DNA integration [GO:0015074]	GO:0003676; GO:0015074	DNA integration [GO:0015074]	-	nucleic acid binding [GO:0003676]	-	-
1656D_27311_c0_g1_i1	1216	1656C;1656D	9.61822	305	10	305	0.584567	18.9368	146.588	10.8012	282.375	26.1429	4.70834	1.65168e-05	0.00530015	XP_020243896.1	aldo-keto reductase family 4 member C9-like	Asparagus officinalis	-	-	-	-	-	-	-	-	-	-	-	-	-	-	-
1656D_27362_c0_g1_i4	880	1656C;1656D	7	52.0988	7	52	0.666435	5.04104	27.8518	7.56086	48.1426	6.36735	2.67069	0.0457989	0.987823	-	-	-	-	-	-	-	-	-	-	-	-	-	-	-	-	-	-
1656D_274_c0_g1_i1	513	1656C;1656D	1	74	1	74	0.236078	17.6473	34.7954	1.08012	68.5107	63.4286	5.98706	0.000433619	0.0609005	-	-	-	-	-	-	-	-	-	-	-	-	-	-	-	-	-	-
1656D_27411_c0_g1_i1	1276	1656C;1656D	5385	799	5385	799	307.432	46.6236	3278.1	5816.46	739.73	0.127179	-2.97507	0.00102819	0.111844	AJT55764.1	aquaporin plasma intrinsic protein 3	Allium sativum	A0A0D4CYY1	Aquaporin plasma intrinsic protein 3	-	Allium sativum (Garlic)	-	-	-	-	integral component of membrane [GO:0016021]; channel activity [GO:0015267]	GO:0015267; GO:0016021	-	integral component of membrane [GO:0016021]	channel activity [GO:0015267]	-	-
1656D_27544_c0_g1_i1	395	1656C;1656D	17	1	17	1	6.34918	0.388585	9.64396	18.3621	0.92582	0.0504202	-4.30986	0.0289824	0.813831	-	-	-	-	-	-	-	-	-	-	-	-	-	-	-	-	-	-
1656D_27610_c1_g1_i1	538	1656C;1656D	1	20	1	20	0.216263	4.37162	9.79826	1.08012	18.5164	17.1429	4.09954	0.0384007	0.936879	-	-	-	-	-	-	-	-	-	-	-	-	-	-	-	-	-	-
1656D_27615_c0_g1_i1	754	1656C;1656D	1	44	1	44	0.120803	5.38219	20.9081	1.08012	40.7361	37.7143	5.23704	0.00359186	0.256928	-	-	-	-	-	-	-	-	-	-	-	-	-	-	-	-	-	-
1656D_27695_c0_g1_i1	658	1656C;1656D	23	1	23	1	3.47997	0.152691	12.8843	24.8428	0.92582	0.0372671	-4.74595	0.0124263	0.546446	-	-	-	-	-	-	-	-	-	-	-	-	-	-	-	-	-	-
1656D_27733_c0_g1_i1	1781	1656C;1656D	23	141	23	141	0.869281	5.46196	77.6917	24.8428	130.541	5.25466	2.3936	0.0264027	0.789742	-	-	-	-	-	-	-	-	-	-	-	-	-	-	-	-	-	-
1656D_27859_c0_g1_i1	447	1656C;1656D	2	26	2	26	0.604205	8.0366	13.1158	2.16025	24.0713	11.1429	3.47805	0.0411372	0.945471	-	-	-	-	-	-	-	-	-	-	-	-	-	-	-	-	-	-
1656D_27921_c0_g2_i1	1129	1656C;1656D	23.1429	190	23	190	1.55186	13.0037	100.374	24.8428	175.906	7.08075	2.8239	0.00699593	0.400856	XP_008782619.1	PREDICTED: cationic peroxidase 1-like	Phoenix dactylifera	A0A2H3XEV1	Peroxidase (EC 1.11.1.7)	LOC103702101	Phoenix dactylifera (Date palm)	-	LOC103702101	1.11.1.7	-	extracellular region [GO:0005576]; heme binding [GO:0020037]; metal ion binding [GO:0046872]; peroxidase activity [GO:0004601]; hydrogen peroxide catabolic process [GO:0042744]; response to oxidative stress [GO:0006979]	GO:0004601; GO:0005576; GO:0006979; GO:0020037; GO:0042744; GO:0046872	hydrogen peroxide catabolic process [GO:0042744]; response to oxidative stress [GO:0006979]	extracellular region [GO:0005576]	heme binding [GO:0020037]; metal ion binding [GO:0046872]; peroxidase activity [GO:0004601]	SUBCELLULAR LOCATION: Secreted {ECO:0000256|RuleBase:RU362060}.	pda:103702101;
1656D_27959_c0_g1_i1	545	1656C;1656D	26	1	26	1	5.49386	0.213388	14.5045	28.0832	0.92582	0.032967	-4.92283	0.00851295	0.44518	-	-	-	-	-	-	-	-	-	-	-	-	-	-	-	-	-	-
1656D_28028_c1_g1_i1	1943	1656C;1656D	117	27	117	27	3.98945	0.944102	75.6858	126.374	24.9971	0.197802	-2.33787	0.029716	0.830588	XP_020269163.1	uncharacterized protein LOC109844516	Asparagus officinalis	-	-	-	-	-	-	-	-	-	-	-	-	-	-	-
1656D_28067_c0_g1_i1	1182	1656C;1656D	1349	248	1349	248	85.1024	15.9773	843.345	1457.09	229.603	0.157577	-2.66587	0.00127076	0.129901	XP_009628019.1	PREDICTED: abscisic acid receptor PYL4-like	Nicotiana tomentosiformis	-	-	-	-	-	-	-	-	-	-	-	-	-	-	-
1656D_2814_c0_g2_i1	1476	1656C;1656D	96.4038	21.6584	96	22	4.57808	1.05271	62.0299	103.692	20.368	0.196429	-2.34792	0.035794	0.892317	-	-	-	-	-	-	-	-	-	-	-	-	-	-	-	-	-	-
1656D_28156_c0_g1_i1	1245	1656C;1656D	160.075	28.7462	160	29	9.43443	1.73123	99.8343	172.82	26.8488	0.155357	-2.68634	0.00949975	0.472013	XP_011652782.1	PREDICTED: uncharacterized protein LOC105435092	Cucumis sativus	-	-	-	-	-	-	-	-	-	-	-	-	-	-	-
1656D_28211_c0_g1_i1	758	1656C;1656D	35	2	35	2	4.19225	0.242605	19.828	37.8043	1.85164	0.0489796	-4.35168	0.00740018	0.40915	-	-	-	-	-	-	-	-	-	-	-	-	-	-	-	-	-	-
1656D_28218_c0_g1_i1	718	1656C;1656D	19	1	19	1	2.48342	0.132294	10.7241	20.5223	0.92582	0.0451128	-4.47032	0.0215513	0.717393	GAV84538.1	zf-RVT domain-containing protein	Cephalotus follicularis	A0A1Q3CWT9	Zf-RVT domain-containing protein	CFOL_v3_27982	Cephalotus follicularis (Albany pitcher plant)	-	-	-	-	-	-	-	-	-	-	-
1656D_28290_c0_g1_i1	979	1656C;1656D	5	46	5	46	0.407939	3.82258	23.9942	5.40062	42.5877	7.88571	2.97924	0.034586	0.869519	OVA06852.1	Phosphoesterase domain	Macleaya cordata	A0A200Q8S8	Purple acid phosphatase (EC 3.1.3.2)	BVC80_495g10	Macleaya cordata	-	-	3.1.3.2	-	acid phosphatase activity [GO:0003993]; metal ion binding [GO:0046872]	GO:0003993; GO:0046872	-	-	acid phosphatase activity [GO:0003993]; metal ion binding [GO:0046872]	-	-
1656D_28328_c0_g1_i1	666	1656C;1656D	1	39	1	39	0.14823	5.83656	18.5936	1.08012	36.107	33.4286	5.06301	0.00546825	0.339892	-	-	-	-	-	-	-	-	-	-	-	-	-	-	-	-	-	-
1656D_28522_c0_g1_i1	453	1656C;1656D	16	1	16	1	4.72131	0.30172	9.1039	17.282	0.92582	0.0535714	-4.22239	0.0338303	0.861749	CAN83392.1	hypothetical protein VITISV_041406	Vitis vinifera	A5BMC8	Uncharacterized protein	VITISV_041406	Vitis vinifera (Grape)	-	-	-	-	nucleic acid binding [GO:0003676]; DNA integration [GO:0015074]	GO:0003676; GO:0015074	DNA integration [GO:0015074]	-	nucleic acid binding [GO:0003676]	-	-
1656D_28615_c0_g1_i1	661	1656C;1656D	1	19	1	19	0.150156	2.87933	9.33535	1.08012	17.5906	16.2857	4.02554	0.0435124	0.954003	-	-	-	-	-	-	-	-	-	-	-	-	-	-	-	-	-	-
1656D_28619_c0_g1_i1	897	1656C;1656D	335	17	335	17	31.0051	1.59969	188.79	361.841	15.7389	0.0434968	-4.52295	1.00966e-05	0.00363357	XP_020248795.1	acyl-acyl carrier protein thioesterase ATL3, chloroplastic-like	Asparagus officinalis	-	-	-	-	-	-	-	-	-	-	-	-	-	-	-
1656D_28629_c0_g1_i1	610	1656C;1656D	20	2	20	2	3.45529	0.348033	11.7271	21.6025	1.85164	0.0857143	-3.54432	0.0399296	0.945471	XP_009400894.1	PREDICTED: ethylene-responsive transcription factor ERF039-like	Musa acuminata subsp. malaccensis	-	-	-	-	-	-	-	-	-	-	-	-	-	-	-
1656D_28654_c0_g1_i1	1227	1656C;1656D	37	255	37	255	2.22244	15.6487	138.024	39.9646	236.084	5.90734	2.56251	0.00848663	0.444622	XP_009383943.1	PREDICTED: galactinol synthase 1-like	Musa acuminata subsp. malaccensis	M0RSP4	Hexosyltransferase (EC 2.4.1.-)	103971608	Musa acuminata subsp. malaccensis (Wild banana) (Musa malaccensis)	-	103971608	2.4.1.-	-	inositol 3-alpha-galactosyltransferase activity [GO:0047216]; galactose metabolic process [GO:0006012]	GO:0006012; GO:0047216	galactose metabolic process [GO:0006012]	-	inositol 3-alpha-galactosyltransferase activity [GO:0047216]	-	mus:103971608;
1656D_28676_c1_g1_i1	453	1656C;1656D	1	18	1	18	0.295082	5.43095	8.87244	1.08012	16.6648	15.4286	3.94753	0.0494701	1	CAN74695.1	hypothetical protein VITISV_024648	Vitis vinifera	A5BK17	Uncharacterized protein	VITISV_024648	Vitis vinifera (Grape)	-	-	-	-	nucleic acid binding [GO:0003676]; DNA integration [GO:0015074]	GO:0003676; GO:0015074	DNA integration [GO:0015074]	-	nucleic acid binding [GO:0003676]	-	-
1656D_28904_c0_g1_i1	1448	1656C;1656D	15	95	15	95	0.729506	4.72806	52.0774	16.2019	87.9529	5.42857	2.44057	0.0368672	0.915121	-	-	-	-	-	-	-	-	-	-	-	-	-	-	-	-	-	-
1656D_28978_c1_g1_i1	2865	1656C;1656D	2	550	2	550	0.0438075	12.3757	255.681	2.16025	509.201	235.714	7.8809	3.87191e-10	1.06498e-06	XP_009382480.1	PREDICTED: uncharacterized protein LOC103970426	Musa acuminata subsp. malaccensis	-	-	-	-	-	-	-	-	-	-	-	-	-	-	-
1656D_29029_c0_g1_i1	740	1656C;1656D	25	3	25	3	3.11207	0.378017	14.8903	27.0031	2.77746	0.102857	-3.28129	0.0383294	0.936879	-	-	-	-	-	-	-	-	-	-	-	-	-	-	-	-	-	-
1656D_29160_c0_g1_i1	877	1656C;1656D	90	3	90	3	8.61201	0.291732	49.9943	97.2111	2.77746	0.0285714	-5.12928	0.000276345	0.0447113	-	-	-	-	-	-	-	-	-	-	-	-	-	-	-	-	-	-
1656D_29160_c1_g1_i1	919	1656C;1656D	104.406	6	104	6	9.32678	0.545202	58.9439	112.333	5.55492	0.0494505	-4.33787	0.000677581	0.0839866	-	-	-	-	-	-	-	-	-	-	-	-	-	-	-	-	-	-
1656D_29165_c0_g1_i1	625	1656C;1656D	3	31	3	31	0.49658	5.16904	15.9704	3.24037	28.7004	8.85714	3.14684	0.0451649	0.981186	-	-	-	-	-	-	-	-	-	-	-	-	-	-	-	-	-	-
1656D_29172_c0_g1_i1	695	1656C;1656D	1	27	1	27	0.137957	3.76671	13.0386	1.08012	24.9971	23.1429	4.5325	0.0172096	0.658309	-	-	-	-	-	-	-	-	-	-	-	-	-	-	-	-	-	-
1656D_292_c0_g1_i1	407	1656C;1656D	1484	18	1484	18	527.119	6.61979	809.784	1602.9	16.6648	0.0103966	-6.58774	7.67287e-11	3.16566e-07	-	-	-	-	-	-	-	-	-	-	-	-	-	-	-	-	-	-
1656D_29230_c2_g1_i1	365	1656C;1656D	3	34	3	34	1.26785	15.1211	17.3591	3.24037	31.4779	9.71429	3.28011	0.0350116	0.878261	-	-	-	-	-	-	-	-	-	-	-	-	-	-	-	-	-	-
1656D_29242_c1_g1_i1	555	1656C;1656D	1	20	1	20	0.20448	4.12585	9.79826	1.08012	18.5164	17.1429	4.09954	0.0384007	0.936879	-	-	-	-	-	-	-	-	-	-	-	-	-	-	-	-	-	-
1656D_29243_c0_g1_i1	742	1656C;1656D	1	36	1	36	0.123936	4.51664	17.2048	1.08012	33.3295	30.8571	4.94753	0.00713422	0.400856	XP_008804941.2	PREDICTED: UDP-glycosyltransferase 82A1	Phoenix dactylifera	A0A2H3YWN2	Glycosyltransferase (EC 2.4.1.-)	LOC103718070	Phoenix dactylifera (Date palm)	-	LOC103718070	2.4.1.-	-	transferase activity, transferring hexosyl groups [GO:0016758]; metabolic process [GO:0008152]	GO:0008152; GO:0016758	metabolic process [GO:0008152]	-	transferase activity, transferring hexosyl groups [GO:0016758]	-	pda:103718070;
1656D_29351_c2_g1_i1	767	1656C;1656D	1	35.0111	1	35	0.117558	4.16955	16.7419	1.08012	32.4037	30	4.90689	0.00781617	0.423717	-	-	-	-	-	-	-	-	-	-	-	-	-	-	-	-	-	-
1656D_29409_c0_g1_i1	660	1656C;1656D	31	4	31	4	4.66679	0.607635	18.5936	33.4838	3.70328	0.110599	-3.17659	0.0331025	0.861749	XP_020251927.1	GDSL esterase/lipase At5g45950-like	Asparagus officinalis	-	-	-	-	-	-	-	-	-	-	-	-	-	-	-
1656D_29611_c0_g1_i1	438	1656C;1656D	1	18	1	18	0.312814	5.78622	8.87244	1.08012	16.6648	15.4286	3.94753	0.0494701	1	XP_010909456.1	PREDICTED: gibberellin-regulated protein 2-like	Elaeis guineensis	-	-	-	-	-	-	-	-	-	-	-	-	-	-	-
1656D_29697_c0_g1_i1	710	1656C;1656D	97.0331	10	97	10	12.9195	1.34731	57.0151	104.772	9.2582	0.0883652	-3.50038	0.00387317	0.273662	OVA17617.1	Peptide methionine sulfoxide reductase MsrA	Macleaya cordata	A0A200R4H6	Peptide methionine sulfoxide reductase MsrA	BVC80_1837g452	Macleaya cordata	-	-	-	-	peptide-methionine (S)-S-oxide reductase activity [GO:0008113]	GO:0008113	-	-	peptide-methionine (S)-S-oxide reductase activity [GO:0008113]	-	-
1656D_29708_c1_g1_i1	453	1656C;1656D	1	20	1	20	0.295082	6.03439	9.79826	1.08012	18.5164	17.1429	4.09954	0.0384007	0.936879	XP_020703268.1	berberine bridge enzyme-like 22	Dendrobium catenatum	-	-	-	-	-	-	-	-	-	-	-	-	-	-	-
1656D_29801_c0_g1_i1	278	1656C;1656D	16	1	16	1	10.3798	0.687201	9.1039	17.282	0.92582	0.0535714	-4.22239	0.0338303	0.861749	-	-	-	-	-	-	-	-	-	-	-	-	-	-	-	-	-	-
1656D_29866_c1_g1_i1	1119	1656C;1656D	39	772	39	772	2.6466	53.4647	378.429	42.1248	714.733	16.967	4.08466	8.69761e-06	0.00325591	ONK81492.1	uncharacterized protein A4U43_C01F29700	Asparagus officinalis	-	-	-	-	-	-	-	-	-	-	-	-	-	-	-
1656D_29893_c0_g1_i1	863	1656C;1656D	28	1	28	1	2.7444	0.0995736	15.5846	30.2435	0.92582	0.0306122	-5.02975	0.00670841	0.388061	-	-	-	-	-	-	-	-	-	-	-	-	-	-	-	-	-	-
1656D_29916_c2_g1_i1	643	1656C;1656D	23	3	23	3	3.62233	0.476255	13.8101	24.8428	2.77746	0.111801	-3.16099	0.0480215	1	XP_020250614.1	probable LRR receptor-like serine/threonine-protein kinase At1g14390	Asparagus officinalis	-	-	-	-	-	-	-	-	-	-	-	-	-	-	-
1656D_29961_c0_g1_i1	549	1656C;1656D	51	9	51	9	10.6381	1.89484	31.7093	55.0863	8.33238	0.151261	-2.72489	0.0349759	0.878261	-	-	-	-	-	-	-	-	-	-	-	-	-	-	-	-	-	-
1656D_30057_c0_g1_i1	443	1656C;1656D	1	21	1	21	0.306588	6.61023	10.2612	1.08012	19.4422	18	4.16993	0.0339915	0.861749	-	-	-	-	-	-	-	-	-	-	-	-	-	-	-	-	-	-
1656D_30080_c0_g1_i1	443	1656C;1656D	22	1	22	1	6.74493	0.314773	12.3443	23.7627	0.92582	0.038961	-4.68182	0.0141867	0.595955	ONK74630.1	uncharacterized protein A4U43_C03F8470	Asparagus officinalis	-	-	-	-	-	-	-	-	-	-	-	-	-	-	-
1656D_30104_c0_g1_i1	1137	1656C;1656D	1406	513	1406	513	93.3932	34.7826	996.8	1518.65	474.946	0.312741	-1.67696	0.0359132	0.894903	XP_020275661.1	probable WRKY transcription factor 70	Asparagus officinalis	-	-	-	-	-	-	-	-	-	-	-	-	-	-	-
1656D_30118_c0_g1_i1	780	1656C;1656D	3743	496	3743	496	428.426	57.5448	2251.05	4042.9	459.207	0.113583	-3.13818	0.000355406	0.0532342	-	-	-	-	-	-	-	-	-	-	-	-	-	-	-	-	-	-
1656D_30137_c1_g1_i1	878	1656C;1656D	10395	2846	10395	2846	993.005	276.295	6931.38	11227.9	2634.88	0.234673	-2.09127	0.0329215	0.861749	OAY64661.1	Auxin-binding protein ABP19a	Ananas comosus	A0A199UIY0	Auxin-binding protein ABP19a	ACMD2_20238	Ananas comosus (Pineapple) (Ananas ananas)	-	-	-	-	extracellular region [GO:0005576]; manganese ion binding [GO:0030145]; nutrient reservoir activity [GO:0045735]	GO:0005576; GO:0030145; GO:0045735	-	extracellular region [GO:0005576]	manganese ion binding [GO:0030145]; nutrient reservoir activity [GO:0045735]	SUBCELLULAR LOCATION: Secreted {ECO:0000256|SAAS:SAAS00568926}.	-
1656D_30138_c0_g2_i1	604	1656C;1656D	1	25.7238	1	26	0.175834	4.55629	12.5757	1.08012	24.0713	22.2857	4.47805	0.0191637	0.688808	-	-	-	-	-	-	-	-	-	-	-	-	-	-	-	-	-	-
1656D_30215_c0_g1_i1	582	1656C;1656D	19	1	19	1	3.5681	0.189145	10.7241	20.5223	0.92582	0.0451128	-4.47032	0.0215513	0.717393	-	-	-	-	-	-	-	-	-	-	-	-	-	-	-	-	-	-
1656D_30215_c1_g1_i1	518	1656C;1656D	23	3	23	3	5.3307	0.703069	13.8101	24.8428	2.77746	0.111801	-3.16099	0.0480215	1	-	-	-	-	-	-	-	-	-	-	-	-	-	-	-	-	-	-
1656D_30244_c2_g1_i1	578	1656C;1656D	2	40	2	40	0.380069	7.66311	19.5965	2.16025	37.0328	17.1429	4.09954	0.0116914	0.541803	-	-	-	-	-	-	-	-	-	-	-	-	-	-	-	-	-	-
1656D_30260_c0_g1_i1	1635	1656C;1656D	3402	219	3402	219	142.502	9.39668	1938.67	3674.58	202.755	0.0551776	-4.17977	4.50896e-06	0.00192648	XP_020110090.1	aspartic proteinase nepenthesin-1-like	Ananas comosus	-	-	-	-	-	-	-	-	-	-	-	-	-	-	-
1656D_30274_c0_g1_i1	996	1656C;1656D	236	16	236	16	18.7931	1.29808	134.861	254.909	14.8131	0.0581114	-4.10504	0.000106646	0.0217284	XP_020264693.1	xyloglucan endotransglucosylase/hydrolase protein 24-like	Asparagus officinalis	-	-	-	-	-	-	-	-	-	-	-	-	-	-	-
1656D_30290_c0_g1_i1	396	1656C;1656D	1	18	1	18	0.371935	6.9668	8.87244	1.08012	16.6648	15.4286	3.94753	0.0494701	1	-	-	-	-	-	-	-	-	-	-	-	-	-	-	-	-	-	-
1656D_30314_c0_g2_i1	536	1656C;1656D	15	1	15	1	3.26492	0.219965	8.56384	16.2019	0.92582	0.0571429	-4.12928	0.0396939	0.945471	-	-	-	-	-	-	-	-	-	-	-	-	-	-	-	-	-	-
1656D_30331_c0_g2_i1	3321	1656C;1656D	339.852	2788	340	2788	6.32528	53.3308	1474.21	367.242	2581.19	7.02857	2.81323	0.000849161	0.0988878	XP_020256303.1	LOW QUALITY PROTEIN: receptor-like protein kinase HAIKU2	Asparagus officinalis	-	-	-	-	-	-	-	-	-	-	-	-	-	-	-
1656D_30368_c0_g1_i1	2262	1656C;1656D	1190	111	1190	111	34.0231	3.25703	694.056	1285.35	102.766	0.079952	-3.64472	2.61259e-05	0.00743378	AGZ95691.1	phenylalanine ammonia-lyase	Allium cepa	U5YRQ6	Phenylalanine ammonia-lyase (EC 4.3.1.24)	PAL2	Allium cepa (Onion)	-	PAL2	4.3.1.24	PATHWAY: Phenylpropanoid metabolism; trans-cinnamate biosynthesis; trans-cinnamate from L-phenylalanine: step 1/1. {ECO:0000256|RuleBase:RU003955}.	cytoplasm [GO:0005737]; phenylalanine ammonia-lyase activity [GO:0045548]; cinnamic acid biosynthetic process [GO:0009800]; L-phenylalanine catabolic process [GO:0006559]	GO:0005737; GO:0006559; GO:0009800; GO:0045548	cinnamic acid biosynthetic process [GO:0009800]; L-phenylalanine catabolic process [GO:0006559]	cytoplasm [GO:0005737]	phenylalanine ammonia-lyase activity [GO:0045548]	SUBCELLULAR LOCATION: Cytoplasm {ECO:0000256|RuleBase:RU003955}.	-
1656D_30417_c0_g2_i1	765	1656C;1656D	22.1937	2.32486	22	2	2.61996	0.278011	12.8072	23.7627	1.85164	0.0779221	-3.68182	0.0308653	0.85112	XP_020267120.1	DNA repair protein recA homolog 2, mitochondrial isoform X1	Asparagus officinalis	-	-	-	-	-	-	-	-	-	-	-	-	-	-	-
1656D_30443_c0_g1_i1	819	1656C;1656D	3	138	3	138	0.318287	14.8584	65.5018	3.24037	127.763	39.4286	5.30117	0.00010487	0.0214422	XP_008783565.1	PREDICTED: UNC93-like protein 1	Phoenix dactylifera	A0A2H3XGU3	UNC93-like protein 1	LOC103702784	Phoenix dactylifera (Date palm)	-	LOC103702784	-	-	integral component of membrane [GO:0016021]	GO:0016021	-	integral component of membrane [GO:0016021]	-	-	pda:103702784;
1656D_30443_c1_g1_i1	1104	1656C;1656D	7	217	7	217	0.483751	15.3014	104.232	7.56086	200.903	26.5714	4.7318	5.58773e-05	0.0135896	XP_020585469.1	UNC93-like protein 1	Phalaenopsis equestris	-	-	-	-	-	-	-	-	-	-	-	-	-	-	-
1656D_30457_c0_g1_i1	1201	1656C;1656D	152	20	152	20	9.3897	1.26195	91.3476	164.179	18.5164	0.112782	-3.14839	0.00353601	0.256326	XP_009409183.1	PREDICTED: protein FAF-like, chloroplastic	Musa acuminata subsp. malaccensis	-	-	-	-	-	-	-	-	-	-	-	-	-	-	-
1656D_30471_c1_g1_i1	884	1656C;1656D	38	1	38	1	3.59356	0.0961198	20.9853	41.0447	0.92582	0.0225564	-5.47032	0.00230508	0.195368	-	-	-	-	-	-	-	-	-	-	-	-	-	-	-	-	-	-
1656D_305_c0_g1_i1	589	1656C;1656D	33.936	368.044	34	368	6.23802	68.1535	188.713	36.7242	340.702	9.27731	3.21371	0.000755526	0.090822	XP_020240797.1	elongation factor 1-delta-like	Asparagus officinalis	-	-	-	-	-	-	-	-	-	-	-	-	-	-	-
1656D_30512_c1_g1_i1	320	1656C;1656D	30	3	30	3	15.6058	1.6536	17.5906	32.4037	2.77746	0.0857143	-3.54432	0.0226433	0.738718	-	-	-	-	-	-	-	-	-	-	-	-	-	-	-	-	-	-
1656D_30527_c0_g1_i1	350	1656C;1656D	16	1	16	1	7.23551	0.47853	9.1039	17.282	0.92582	0.0535714	-4.22239	0.0338303	0.861749	XP_020260498.1	protodermal factor 1	Asparagus officinalis	-	-	-	-	-	-	-	-	-	-	-	-	-	-	-
1656D_30552_c0_g1_i1	1060	1656C;1656D	50	3	50	3	3.65201	0.223453	28.3918	54.0062	2.77746	0.0514286	-4.28129	0.00387809	0.273674	-	-	-	-	-	-	-	-	-	-	-	-	-	-	-	-	-	-
1656D_30600_c1_g1_i1	398	1656C;1656D	16	1	16	1	5.90432	0.383471	9.1039	17.282	0.92582	0.0535714	-4.22239	0.0338303	0.861749	XP_014227280.1	protein lethal(2)essential for life-like	Trichogramma pretiosum	-	-	-	-	-	-	-	-	-	-	-	-	-	-	-
1656D_30624_c0_g3_i1	1049	1656C;1656D	27.3352	142.06	27	142	2.02538	10.7324	80.3149	29.1633	131.466	4.50794	2.17247	0.0405056	0.945471	PKA57283.1	Putative GATA transcription factor 22	Apostasia shenzhenica	A0A2I0AP23	GATA transcription factor 22	GATA22 AXF42_Ash002587	Apostasia shenzhenica	-	GATA22	-	-	DNA-binding transcription factor activity [GO:0003700]; sequence-specific DNA binding [GO:0043565]; zinc ion binding [GO:0008270]	GO:0003700; GO:0008270; GO:0043565	-	-	DNA-binding transcription factor activity [GO:0003700]; sequence-specific DNA binding [GO:0043565]; zinc ion binding [GO:0008270]	-	-
1656D_30672_c0_g1_i1	623	1656C;1656D	291.172	15	291	15	48.4712	2.51505	164.102	314.316	13.8873	0.0441826	-4.50038	1.74897e-05	0.00554855	XP_020250156.1	tabersonine 16-O-methyltransferase-like	Asparagus officinalis	-	-	-	-	-	-	-	-	-	-	-	-	-	-	-
1656D_30756_c4_g1_i1	553	1656C;1656D	19	1	19	1	3.91104	0.207723	10.7241	20.5223	0.92582	0.0451128	-4.47032	0.0215513	0.717393	XP_020250145.1	uncharacterized protein LOC109827551	Asparagus officinalis	-	-	-	-	-	-	-	-	-	-	-	-	-	-	-
1656D_30767_c0_g1_i1	221	1656C;1656D	1	19	1	19	0.961738	19.3079	9.33535	1.08012	17.5906	16.2857	4.02554	0.0435124	0.954003	-	-	-	-	-	-	-	-	-	-	-	-	-	-	-	-	-	-
1656D_30774_c0_g1_i1	1410	1656C;1656D	355	31	355	31	17.8491	1.59466	206.072	383.444	28.7004	0.0748491	-3.73987	0.000105643	0.0215621	XP_024159874.1	DNA damage-repair/toleration protein DRT100	Rosa chinensis	-	-	-	-	-	-	-	-	-	-	-	-	-	-	-
1656D_30792_c0_g1_i1	767	1656C;1656D	30	4	30	4	3.52674	0.47637	18.0535	32.4037	3.70328	0.114286	-3.12928	0.0364039	0.905568	XP_020265440.1	probable cellulose synthase A catalytic subunit 5	UDP-forming isoform X1Asparagus officinalis	-	-	-	-	-	-	-	-	-	-	-	-	-	-	-
1656D_30799_c0_g1_i1	1439	1656C;1656D	519	2177	519	2177	25.4381	109.188	1288.05	560.584	2015.51	3.59538	1.84614	0.022472	0.734167	XP_020273740.1	purple acid phosphatase 17-like	Asparagus officinalis	-	-	-	-	-	-	-	-	-	-	-	-	-	-	-
1656D_30799_c1_g1_i1	536	1656C;1656D	3	30	3	30	0.652984	6.59895	15.5075	3.24037	27.7746	8.57143	3.09954	0.0492958	1	-	-	-	-	-	-	-	-	-	-	-	-	-	-	-	-	-	-
1656D_30808_c0_g1_i1	1668	1656C;1656D	74	14	74	14	3.02564	0.586433	46.4453	79.9291	12.9615	0.162162	-2.62449	0.0283431	0.812388	XP_009399936.1	PREDICTED: probable pectinesterase 68	Musa acuminata subsp. malaccensis	M0RW60	Pectinesterase (EC 3.1.1.11)	103984174	Musa acuminata subsp. malaccensis (Wild banana) (Musa malaccensis)	-	103984174	3.1.1.11	PATHWAY: Glycan metabolism; pectin degradation; 2-dehydro-3-deoxy-D-gluconate from pectin: step 1/5. {ECO:0000256|RuleBase:RU000589}.	cell wall [GO:0005618]; aspartyl esterase activity [GO:0045330]; pectinesterase activity [GO:0030599]; cell wall modification [GO:0042545]; pectin catabolic process [GO:0045490]	GO:0005618; GO:0030599; GO:0042545; GO:0045330; GO:0045490	cell wall modification [GO:0042545]; pectin catabolic process [GO:0045490]	cell wall [GO:0005618]	aspartyl esterase activity [GO:0045330]; pectinesterase activity [GO:0030599]	-	mus:103984174;
1656D_30811_c0_g1_i1	1823	1656C;1656D	18	476.302	18	476	0.661706	17.9489	230.066	19.4422	440.69	22.6667	4.5025	6.38199e-06	0.00250769	XP_008804150.1	PREDICTED: uncharacterized protein LOC103717503	Phoenix dactylifera	A0A2H3YUP4	uncharacterized protein LOC103717503	LOC103717503	Phoenix dactylifera (Date palm)	-	LOC103717503	-	-	-	-	-	-	-	-	pda:103717503;
1656D_30835_c0_g1_i1	2895	1656C;1656D	68	305	68	305	1.47232	6.78422	177.912	73.4484	282.375	3.84454	1.94281	0.0326124	0.861749	XP_018511924.1	PREDICTED: uncharacterized protein LOC103851934	Brassica rapa	-	-	-	-	-	-	-	-	-	-	-	-	-	-	-
1656D_30931_c0_g1_i1	1465	1656C;1656D	27.588	162.882	28	163	1.32235	7.99031	90.5761	30.2435	150.909	4.9898	2.31898	0.0260979	0.789742	XP_020273957.1	probable WRKY transcription factor 4	Asparagus officinalis	-	-	-	-	-	-	-	-	-	-	-	-	-	-	-
1656D_30934_c0_g1_i1	1900	1656C;1656D	14229	3898	14229	3898	498.111	139.915	9488.96	15369.1	3608.85	0.234812	-2.09042	0.0453968	0.983372	ONK62849.1	uncharacterized protein A4U43_C07F8760	Asparagus officinalis	-	-	-	-	-	-	-	-	-	-	-	-	-	-	-
1656D_30979_c0_g1_i1	572	1656C;1656D	71	12	71	12	13.7563	2.34311	43.8993	76.6888	11.1098	0.144869	-2.78718	0.0223581	0.731065	-	-	-	-	-	-	-	-	-	-	-	-	-	-	-	-	-	-
1656D_31016_c1_g1_i1	462	1656C;1656D	14	1	14	1	3.99926	0.290624	8.02377	15.1217	0.92582	0.0612245	-4.02975	0.0468499	1	ATP16743.1	beta-tubulin	Adelphocoris suturalis	A0A2D1QW13	Tubulin beta chain	-	Adelphocoris suturalis	-	-	-	-	cytoplasm [GO:0005737]; microtubule [GO:0005874]; GTP binding [GO:0005525]; GTPase activity [GO:0003924]; structural constituent of cytoskeleton [GO:0005200]; microtubule-based process [GO:0007017]	GO:0003924; GO:0005200; GO:0005525; GO:0005737; GO:0005874; GO:0007017	microtubule-based process [GO:0007017]	cytoplasm [GO:0005737]; microtubule [GO:0005874]	GTPase activity [GO:0003924]; GTP binding [GO:0005525]; structural constituent of cytoskeleton [GO:0005200]	SUBCELLULAR LOCATION: Cytoplasm, cytoskeleton {ECO:0000256|SAAS:SAAS00361597}.	-
1656D_31058_c0_g1_i1	518	1656C;1656D	1	19.7851	1	20	0.231769	4.63677	9.79826	1.08012	18.5164	17.1429	4.09954	0.0384007	0.936879	-	-	-	-	-	-	-	-	-	-	-	-	-	-	-	-	-	-
1656D_31073_c0_g2_i1	520	1656C;1656D	15	118	15	118	3.45181	27.4528	62.7243	16.2019	109.247	6.74286	2.75336	0.0162821	0.634808	XP_020255268.1	uncharacterized protein LOC109832253	Asparagus officinalis	-	-	-	-	-	-	-	-	-	-	-	-	-	-	-
1656D_31114_c0_g1_i1	1301	1656C;1656D	315	1165	315	1165	17.5402	66.3182	709.41	340.239	1078.58	3.17007	1.66451	0.0374648	0.925183	XP_008777650.1	PREDICTED: uncharacterized protein LOC103697549	Phoenix dactylifera	A0A2H3X383	uncharacterized protein LOC103697549	LOC103697549	Phoenix dactylifera (Date palm)	-	LOC103697549	-	-	-	-	-	-	-	-	pda:103697549;
1656D_31153_c0_g1_i1	3391	1656C;1656D	1897	449	1897	449	34.5105	8.39562	1232.34	2048.99	415.693	0.202877	-2.30132	0.00501701	0.320448	XP_008805019.1	PREDICTED: protein DWARF 53-LIKE-like	Phoenix dactylifera	A0A2H3YXM3	protein DWARF 53-LIKE-like	LOC103718122	Phoenix dactylifera (Date palm)	-	LOC103718122	-	-	ATP binding [GO:0005524]; protein metabolic process [GO:0019538]	GO:0005524; GO:0019538	protein metabolic process [GO:0019538]	-	ATP binding [GO:0005524]	-	pda:103718122;
1656D_31212_c0_g1_i1	1839	1656C;1656D	77	792	77	792	2.80145	29.5395	408.21	83.1695	733.25	8.81633	3.14018	0.000303408	0.0474169	XP_012476003.1	PREDICTED: ACT domain-containing protein ACR8-like	Gossypium raimondii	A0A0D2PFD5	Uncharacterized protein	B456_004G203900	Gossypium raimondii (New World cotton)	-	-	-	-	-	-	-	-	-	-	gra:105792133;
1656D_31226_c0_g1_i1	1613	1656C;1656D	108	11	108	11	4.59894	0.479761	63.4187	116.653	10.184	0.0873016	-3.51785	0.00304997	0.237395	XP_026281005.1	acidic leucine-rich nuclear phosphoprotein 32 family member B-like isoform X1	Frankliniella occidentalis	-	-	-	-	-	-	-	-	-	-	-	-	-	-	-
1656D_31252_c0_g1_i1	643	1656C;1656D	6.49265	50.884	6	51	1.02255	8.07792	26.8488	6.48074	47.2168	7.28571	2.86507	0.0357705	0.891924	XP_023002179.1	transcription factor MYB44-like	Cucurbita maxima	-	-	-	-	-	-	-	-	-	-	-	-	-	-	-
1656D_31323_c0_g1_i1	674	1656C;1656D	19	2	19	2	2.75982	0.293596	11.187	20.5223	1.85164	0.0902256	-3.47032	0.0456307	0.984747	-	-	-	-	-	-	-	-	-	-	-	-	-	-	-	-	-	-
1656D_31330_c0_g1_i1	1708	1656C;1656D	706	96	706	96	28.0538	3.90871	425.723	762.567	88.8787	0.116552	-3.10095	0.000329041	0.049939	NP_001130335.1	uncharacterized protein LOC100191430 precursor	Zea mays	B4F8S9	Uncharacterized protein	100191430 ZEAMMB73_Zm00001d034373	Zea mays (Maize)	-	100191430	-	-	-	-	-	-	-	-	zma:100191430;
1656D_31359_c0_g2_i1	797	1656C;1656D	1	26	1	26	0.110659	2.91758	12.5757	1.08012	24.0713	22.2857	4.47805	0.0191637	0.688808	-	-	-	-	-	-	-	-	-	-	-	-	-	-	-	-	-	-
1656D_31388_c0_g1_i1	1353	1656C;1656D	67	10	67	10	3.54881	0.541701	40.8132	72.3683	9.2582	0.127932	-2.96655	0.0176048	0.658309	XP_008802414.1	PREDICTED: 3-ketoacyl-CoA synthase 12-like	Phoenix dactylifera	A0A2H3YRH0	3-ketoacyl-CoA synthase (EC 2.3.1.-)	LOC103716261	Phoenix dactylifera (Date palm)	-	LOC103716261	2.3.1.-	PATHWAY: Lipid metabolism; fatty acid biosynthesis. {ECO:0000256|PIRNR:PIRNR036417}.	membrane [GO:0016020]; transferase activity, transferring acyl groups other than amino-acyl groups [GO:0016747]; fatty acid biosynthetic process [GO:0006633]	GO:0006633; GO:0016020; GO:0016747	fatty acid biosynthetic process [GO:0006633]	membrane [GO:0016020]	transferase activity, transferring acyl groups other than amino-acyl groups [GO:0016747]	-	pda:103716261;
1656D_31393_c1_g1_i1	887	1656C;1656D	22	122	22	122	2.07008	11.6688	68.3564	23.7627	112.95	4.75325	2.24891	0.04064	0.945471	XP_010916176.1	PREDICTED: uncharacterized protein At1g66480-like	Elaeis guineensis	-	-	-	-	-	-	-	-	-	-	-	-	-	-	-
1656D_31402_c0_g1_i1	597	1656C;1656D	1	19	1	19	0.179367	3.43477	9.33535	1.08012	17.5906	16.2857	4.02554	0.0435124	0.954003	-	-	-	-	-	-	-	-	-	-	-	-	-	-	-	-	-	-
1656D_31482_c0_g1_i1	1494	1656C;1656D	185	42	185	42	8.65439	2.01118	119.354	199.823	38.8844	0.194595	-2.36146	0.0167287	0.648283	XP_020243910.1	cyclin-D4-1-like	Asparagus officinalis	-	-	-	-	-	-	-	-	-	-	-	-	-	-	-
1656D_31492_c0_g1_i1	1824	1656C;1656D	716	135	716	135	26.3041	5.08402	449.177	773.368	124.986	0.161612	-2.62939	0.00180583	0.164522	XP_010265215.1	PREDICTED: protein ASPARTIC PROTEASE IN GUARD CELL 1	Nelumbo nucifera	A0A1U8AR65	protein ASPARTIC PROTEASE IN GUARD CELL 1	LOC104603014	Nelumbo nucifera (Sacred lotus)	-	LOC104603014	-	-	integral component of membrane [GO:0016021]; aspartic-type endopeptidase activity [GO:0004190]; response to abscisic acid [GO:0009737]; response to water deprivation [GO:0009414]	GO:0004190; GO:0009414; GO:0009737; GO:0016021	response to abscisic acid [GO:0009737]; response to water deprivation [GO:0009414]	integral component of membrane [GO:0016021]	aspartic-type endopeptidase activity [GO:0004190]	-	nnu:104603014;
1656D_31593_c0_g1_i1	1952	1656C;1656D	125	1	125	1	4.23919	0.0347787	67.9706	135.015	0.92582	0.00685714	-7.18818	5.68833e-06	0.00230124	XP_010489852.1	PREDICTED: uncharacterized protein LOC104767537	Camelina sativa	-	-	-	-	-	-	-	-	-	-	-	-	-	-	-
1656D_31598_c2_g1_i1	722	1656C;1656D	2	29	2	29	0.259041	3.80197	14.5045	2.16025	26.8488	12.4286	3.63559	0.0306354	0.848087	XP_020251333.1	cationic amino acid transporter 5 isoform X1	Asparagus officinalis	-	-	-	-	-	-	-	-	-	-	-	-	-	-	-
1656D_31629_c0_g1_i1	665	1656C;1656D	1	40	1	40	0.148621	6.00105	19.0565	1.08012	37.0328	34.2857	5.09954	0.00501657	0.320448	-	-	-	-	-	-	-	-	-	-	-	-	-	-	-	-	-	-
1656D_31630_c0_g1_i1	497	1656C;1656D	127	10	127	10	31.8222	2.53015	73.2169	137.176	9.2582	0.0674916	-3.88915	0.000991664	0.110373	XP_020256667.1	uncharacterized protein LOC109833422	Asparagus officinalis	-	-	-	-	-	-	-	-	-	-	-	-	-	-	-
1656D_31632_c1_g1_i1	692	1656C;1656D	30	3	30	3	4.16884	0.421555	17.5906	32.4037	2.77746	0.0857143	-3.54432	0.0226433	0.738718	XP_008809703.1	PREDICTED: UDP-glycosyltransferase 86A2-like	Phoenix dactylifera	A0A2H3Z7M7	Glycosyltransferase (EC 2.4.1.-)	LOC103721317	Phoenix dactylifera (Date palm)	-	LOC103721317	2.4.1.-	-	transferase activity, transferring hexosyl groups [GO:0016758]; metabolic process [GO:0008152]	GO:0008152; GO:0016758	metabolic process [GO:0008152]	-	transferase activity, transferring hexosyl groups [GO:0016758]	-	pda:103721317;
1656D_31673_c0_g1_i1	300	1656C;1656D	23	3	23	3	13.1563	1.83083	13.8101	24.8428	2.77746	0.111801	-3.16099	0.0480215	1	CDW61368.1	hypothetical protein TTRE_0000982701, partial	Trichuris trichiura	A0A077ZNG5	Uncharacterized protein (Fragment)	TTRE_0000982701	Trichuris trichiura (Whipworm) (Trichocephalus trichiurus)	-	-	-	-	-	-	-	-	-	-	-
1656D_31710_c0_g1_i1	1824	1656C;1656D	33	210	33	210	1.21234	7.90848	115.033	35.6441	194.422	5.45455	2.44746	0.0145179	0.602502	CAN78706.1	hypothetical protein VITISV_028658	Vitis vinifera	A5B6L3	Uncharacterized protein	VITISV_028658	Vitis vinifera (Grape)	-	-	-	-	-	-	-	-	-	-	-
1656D_31710_c3_g1_i1	691	1656C;1656D	1	18	1	18	0.139304	2.53545	8.87244	1.08012	16.6648	15.4286	3.94753	0.0494701	1	CAN83392.1	hypothetical protein VITISV_041406	Vitis vinifera	A5BMC8	Uncharacterized protein	VITISV_041406	Vitis vinifera (Grape)	-	-	-	-	nucleic acid binding [GO:0003676]; DNA integration [GO:0015074]	GO:0003676; GO:0015074	DNA integration [GO:0015074]	-	nucleic acid binding [GO:0003676]	-	-
1656D_31738_c0_g1_i1	391	1656C;1656D	4	41.088	4	41	1.51695	16.2603	21.1396	4.32049	37.9586	8.78571	3.13516	0.0326606	0.861749	-	-	-	-	-	-	-	-	-	-	-	-	-	-	-	-	-	-
1656D_31767_c0_g1_i1	313	1656C;1656D	1	23	1	23	0.536927	13.1289	11.187	1.08012	21.2939	19.7143	4.30117	0.0268439	0.789742	-	-	-	-	-	-	-	-	-	-	-	-	-	-	-	-	-	-
1656D_31799_c0_g2_i1	1114	1656C;1656D	43	6.99104	43	7	2.93569	0.487061	26.463	46.4453	6.48074	0.139535	-2.8413	0.0352501	0.880848	XP_020276629.1	uncharacterized protein LOC109850955 isoform X1	Asparagus officinalis	-	-	-	-	-	-	-	-	-	-	-	-	-	-	-
1656D_318_c0_g1_i1	1100	1656C;1656D	16	124	16	124	1.11116	8.78625	66.0418	17.282	114.802	6.64286	2.7318	0.0158911	0.62409	-	-	-	-	-	-	-	-	-	-	-	-	-	-	-	-	-	-
1656D_31851_c0_g1_i1	920	1656C;1656D	2	38	2	38	0.178381	3.44756	18.6707	2.16025	35.1812	16.2857	4.02554	0.0137746	0.584382	XP_002272487.1	PREDICTED: benzyl alcohol O-benzoyltransferase	Vitis vinifera	D7TSR5	Uncharacterized protein	VIT_14s0006g01460	Vitis vinifera (Grape)	-	-	-	-	transferase activity, transferring acyl groups other than amino-acyl groups [GO:0016747]	GO:0016747	-	-	transferase activity, transferring acyl groups other than amino-acyl groups [GO:0016747]	-	vvi:100245062;
1656D_31873_c0_g1_i1	2212	1656C;1656D	126	1395	126	1395	3.69601	41.9915	713.807	136.096	1291.52	9.4898	3.24638	0.000136477	0.0261895	ONK71097.1	uncharacterized protein A4U43_C04F4690	Asparagus officinalis	-	-	-	-	-	-	-	-	-	-	-	-	-	-	-
1656D_31953_c1_g1_i1	571	1656C;1656D	71	13	71	13	13.8009	2.54588	44.3622	76.6888	12.0357	0.156942	-2.6717	0.0272658	0.796061	XP_008802449.1	PREDICTED: uncharacterized protein LOC103716287	Phoenix dactylifera	A0A2H3YR72	uncharacterized protein LOC103716287	LOC103716287	Phoenix dactylifera (Date palm)	-	LOC103716287	-	-	integral component of membrane [GO:0016021]	GO:0016021	-	integral component of membrane [GO:0016021]	-	-	pda:103716287;
1656D_32021_c1_g1_i1	1019	1656C;1656D	39	1	39	1	3.00808	0.0786096	21.5253	42.1248	0.92582	0.021978	-5.50779	0.00208978	0.180971	XP_020250812.1	DNA replication licensing factor MCM6	Asparagus officinalis	-	-	-	-	-	-	-	-	-	-	-	-	-	-	-
1656D_32029_c0_g1_i3	967	1656C;1656D	68.6028	11.9327	69	12	5.69589	1.00889	42.8192	74.5285	11.1098	0.149068	-2.74595	0.0247521	0.773649	XP_020259757.1	chaperone protein dnaJ 6-like	Asparagus officinalis	-	-	-	-	-	-	-	-	-	-	-	-	-	-	-
1656D_32049_c0_g1_i1	629	1656C;1656D	26	3	26	3	4.2551	0.494709	15.4303	28.0832	2.77746	0.0989011	-3.33787	0.0343618	0.865768	-	-	-	-	-	-	-	-	-	-	-	-	-	-	-	-	-	-
1656D_32077_c1_g1_i1	1804	1656C;1656D	11	188	11	188	0.40944	7.1728	92.9678	11.8814	174.054	14.6494	3.87276	0.000624071	0.0793986	-	-	-	-	-	-	-	-	-	-	-	-	-	-	-	-	-	-
1656D_32103_c0_g1_i2	743	1656C;1656D	5	66	5	66	0.618387	8.2627	33.2524	5.40062	61.1041	11.3143	3.50007	0.0103372	0.492757	-	-	-	-	-	-	-	-	-	-	-	-	-	-	-	-	-	-
1656D_32106_c0_g1_i1	1030	1656C;1656D	4	53	4	53	0.303955	4.10531	26.6945	4.32049	49.0685	11.3571	3.50553	0.0143929	0.602502	-	-	-	-	-	-	-	-	-	-	-	-	-	-	-	-	-	-
1656D_32139_c0_g1_i1	664	1656C;1656D	27	1	27	1	4.02334	0.150399	15.0446	29.1633	0.92582	0.031746	-4.97728	0.00754742	0.411271	-	-	-	-	-	-	-	-	-	-	-	-	-	-	-	-	-	-
1656D_32156_c0_g1_i1	556	1656C;1656D	343	52	343	52	69.8835	10.6893	209.312	370.482	48.1426	0.129946	-2.94402	0.00143039	0.140032	XP_020255513.1	gibberellin-regulated protein 6-like	Asparagus officinalis	-	-	-	-	-	-	-	-	-	-	-	-	-	-	-
1656D_32159_c0_g1_i1	633	1656C;1656D	1.22105	27.7401	1	28	0.197643	4.52407	13.5015	1.08012	25.923	24	4.58496	0.0154896	0.61638	CBI36851.3	unnamed protein product, partial	Vitis vinifera	-	-	-	-	-	-	-	-	-	-	-	-	-	-	-
1656D_32189_c0_g1_i1	464	1656C;1656D	1	19	1	19	0.283536	5.47421	9.33535	1.08012	17.5906	16.2857	4.02554	0.0435124	0.954003	PKU76715.1	Retrovirus-related Pol polyprotein from transposon TNT 1-94	Dendrobium catenatum	A0A2I0WM28	Retrovirus-related Pol polyprotein from transposon TNT 1-94	MA16_Dca001321	Dendrobium catenatum	-	-	-	-	nucleic acid binding [GO:0003676]; DNA integration [GO:0015074]	GO:0003676; GO:0015074	DNA integration [GO:0015074]	-	nucleic acid binding [GO:0003676]	-	-
1656D_32192_c2_g1_i1	1449	1656C;1656D	823	4935	823	4935	39.9911	245.4	2728.93	888.942	4568.92	5.13973	2.36169	0.00645224	0.376072	XP_020240701.1	uncharacterized protein LOC109819398	Asparagus officinalis	-	-	-	-	-	-	-	-	-	-	-	-	-	-	-
1656D_32219_c0_g1_i1	1057	1656C;1656D	10	66	10	66	0.733246	4.93492	35.9527	10.8012	61.1041	5.65714	2.50007	0.0468936	1	-	-	-	-	-	-	-	-	-	-	-	-	-	-	-	-	-	-
1656D_32223_c0_g1_i1	808	1656C;1656D	77	938	77	938	8.34093	103.081	475.794	83.1695	868.419	10.4416	3.38427	0.000101571	0.0208414	XP_020256169.1	auxin-induced protein 22D-like	Asparagus officinalis	-	-	-	-	-	-	-	-	-	-	-	-	-	-	-
1656D_32247_c0_g2_i1	699	1656C;1656D	30.9845	3.32739	31	3	4.23358	0.45988	18.1306	33.4838	2.77746	0.0829493	-3.59163	0.0204923	0.717393	XP_020248795.1	acyl-acyl carrier protein thioesterase ATL3, chloroplastic-like	Asparagus officinalis	-	-	-	-	-	-	-	-	-	-	-	-	-	-	-
1656D_32295_c0_g1_i1	549	1656C;1656D	16	1	16	1	3.33743	0.210538	9.1039	17.282	0.92582	0.0535714	-4.22239	0.0338303	0.861749	XP_008804475.1	PREDICTED: glutamate receptor 3.1-like isoform X1	Phoenix dactylifera	A0A2H3YW07	Glutamate receptor	LOC103717756	Phoenix dactylifera (Date palm)	-	LOC103717756	-	-	integral component of membrane [GO:0016021]; ionotropic glutamate receptor activity [GO:0004970]	GO:0004970; GO:0016021	-	integral component of membrane [GO:0016021]	ionotropic glutamate receptor activity [GO:0004970]	SUBCELLULAR LOCATION: Membrane {ECO:0000256|PIRNR:PIRNR037090}.	pda:103717756;
1656D_32295_c1_g1_i1	843	1656C;1656D	33	5	33	5	3.3501	0.515509	20.1366	35.6441	4.6291	0.12987	-2.94486	0.0409009	0.945471	ONK64279.1	uncharacterized protein A4U43_C07F24020	Asparagus officinalis	-	-	-	-	-	-	-	-	-	-	-	-	-	-	-
1656D_32320_c0_g1_i1	823	1656C;1656D	39	1	39	1	4.10687	0.106878	21.5253	42.1248	0.92582	0.021978	-5.50779	0.00208978	0.180971	-	-	-	-	-	-	-	-	-	-	-	-	-	-	-	-	-	-
1656D_32332_c0_g1_i1	1138	1656C;1656D	83	14	83	14	5.50678	0.948129	51.3059	89.6502	12.9615	0.144578	-2.79008	0.0185978	0.674132	ONK64373.1	uncharacterized protein A4U43_C07F25130	Asparagus officinalis	-	-	-	-	-	-	-	-	-	-	-	-	-	-	-
1656D_32343_c1_g1_i1	434	1656C;1656D	16	1	16	1	5.07931	0.327161	9.1039	17.282	0.92582	0.0535714	-4.22239	0.0338303	0.861749	-	-	-	-	-	-	-	-	-	-	-	-	-	-	-	-	-	-
1656D_32361_c1_g1_i1	469	1656C;1656D	1	18	1	18	0.278313	5.08529	8.87244	1.08012	16.6648	15.4286	3.94753	0.0494701	1	-	-	-	-	-	-	-	-	-	-	-	-	-	-	-	-	-	-
1656D_32378_c1_g1_i1	409	1656C;1656D	16	1	16	1	5.63527	0.364416	9.1039	17.282	0.92582	0.0535714	-4.22239	0.0338303	0.861749	XP_014227262.1	uncharacterized protein LOC106652681	Trichogramma pretiosum	-	-	-	-	-	-	-	-	-	-	-	-	-	-	-
1656D_32394_c0_g1_i1	301	1656C;1656D	35	6	35	6	19.9195	3.64693	21.6796	37.8043	5.55492	0.146939	-2.76671	0.0482993	1	-	-	-	-	-	-	-	-	-	-	-	-	-	-	-	-	-	-
1656D_32395_c1_g1_i1	433	1656C;1656D	20	2	20	2	6.37702	0.657081	11.7271	21.6025	1.85164	0.0857143	-3.54432	0.0399296	0.945471	-	-	-	-	-	-	-	-	-	-	-	-	-	-	-	-	-	-
1656D_32438_c0_g1_i1	587	1656C;1656D	33	1	33	1	6.10322	0.186269	18.2849	35.6441	0.92582	0.025974	-5.26679	0.0038461	0.272078	-	-	-	-	-	-	-	-	-	-	-	-	-	-	-	-	-	-
1656D_32454_c0_g3_i1	1337	1656C;1656D	29.6001	176.895	30	177	1.59172	9.72729	98.1369	32.4037	163.87	5.05714	2.33832	0.0228082	0.743047	XP_020275069.1	cytochrome P450 709B2-like	Asparagus officinalis	-	-	-	-	-	-	-	-	-	-	-	-	-	-	-
1656D_32462_c0_g2_i1	992	1656C;1656D	7	57.6836	7	58	0.560585	4.70612	30.6292	7.56086	53.6976	7.10204	2.82823	0.0326815	0.861749	-	-	-	-	-	-	-	-	-	-	-	-	-	-	-	-	-	-
1656D_325_c0_g1_i1	605	1656C;1656D	70	498	70	498	12.2726	87.9488	268.334	75.6086	461.058	6.09796	2.60833	0.00311485	0.238775	ONK69310.1	uncharacterized protein A4U43_C05F21510	Asparagus officinalis	-	-	-	-	-	-	-	-	-	-	-	-	-	-	-
1656D_32525_c0_g1_i1	769	1656C;1656D	34	245	34	245	3.9804	29.0587	131.775	36.7242	226.826	6.17647	2.62678	0.00764062	0.415639	XP_020260237.1	uncharacterized protein LOC109836675	Asparagus officinalis	-	-	-	-	-	-	-	-	-	-	-	-	-	-	-
1656D_32570_c1_g2_i1	625	1656C;1656D	15	1	15	1	2.4829	0.166743	8.56384	16.2019	0.92582	0.0571429	-4.12928	0.0396939	0.945471	-	-	-	-	-	-	-	-	-	-	-	-	-	-	-	-	-	-
1656D_32597_c0_g1_i1	705	1656C;1656D	1	24	1	24	0.13472	3.27109	11.6499	1.08012	22.2197	20.5714	4.36257	0.0239372	0.767531	-	-	-	-	-	-	-	-	-	-	-	-	-	-	-	-	-	-
1656D_32617_c1_g1_i1	1395	1656C;1656D	98.8821	24.4911	99	24	5.03901	1.27677	64.576	106.932	22.2197	0.207792	-2.26679	0.0403737	0.945471	XP_009370377.1	PREDICTED: serine/threonine-protein phosphatase 7 long form homolog	Pyrus x bretschneideri	-	-	-	-	-	-	-	-	-	-	-	-	-	-	-
1656D_32697_c0_g2_i1	1047	1656C;1656D	162.687	23	163	23	12.0859	1.74213	98.677	176.06	21.2939	0.120947	-3.04756	0.00394993	0.277895	XP_020263952.1	probable protein ABIL5	Asparagus officinalis	-	-	-	-	-	-	-	-	-	-	-	-	-	-	-
1656D_32706_c3_g1_i1	640	1656C;1656D	16	1	16	1	2.54037	0.160061	9.1039	17.282	0.92582	0.0535714	-4.22239	0.0338303	0.861749	XP_020275464.1	uncharacterized protein LOC109849979 isoform X1	Asparagus officinalis	-	-	-	-	-	-	-	-	-	-	-	-	-	-	-
1656D_32724_c3_g1_i1	597	1656C;1656D	1	21	1	21	0.179367	3.79633	10.2612	1.08012	19.4422	18	4.16993	0.0339915	0.861749	-	-	-	-	-	-	-	-	-	-	-	-	-	-	-	-	-	-
1656D_32726_c0_g1_i1	836	1656C;1656D	2	50	2	50	0.205624	5.21982	24.2256	2.16025	46.291	21.4286	4.42146	0.00543743	0.339892	XP_020255498.1	vacuolar amino acid transporter 1-like isoform X2	Asparagus officinalis	-	-	-	-	-	-	-	-	-	-	-	-	-	-	-
1656D_32752_c0_g1_i1	553	1656C;1656D	438	103	438	103	90.1599	21.3955	284.227	473.094	95.3595	0.201566	-2.31068	0.00748992	0.40915	-	-	-	-	-	-	-	-	-	-	-	-	-	-	-	-	-	-
1656D_32762_c0_g2_i1	1117	1656C;1656D	4778.81	1547.68	4779	1548	325.079	107.44	3297.54	5161.91	1433.17	0.277643	-1.8487	0.0335326	0.861749	XP_010933649.1	PREDICTED: probable aquaporin TIP2-1	Elaeis guineensis	-	-	-	-	-	-	-	-	-	-	-	-	-	-	-
1656D_32783_c1_g1_i1	345	1656C;1656D	17	1	17	1	7.86613	0.489589	9.64396	18.3621	0.92582	0.0504202	-4.30986	0.0289824	0.813831	-	-	-	-	-	-	-	-	-	-	-	-	-	-	-	-	-	-
1656D_32795_c0_g1_i1	784	1656C;1656D	1	29	1	29	0.113551	3.3379	13.9645	1.08012	26.8488	24.8571	4.63559	0.0139711	0.589041	XP_020266884.1	uncharacterized protein LOC109842415	Asparagus officinalis	-	-	-	-	-	-	-	-	-	-	-	-	-	-	-
1656D_3281_c0_g1_i1	854	1656C;1656D	3	125	3	125	0.298709	12.6414	59.4839	3.24037	115.728	35.7143	5.15843	0.000186918	0.03364	XP_009394156.1	PREDICTED: probable membrane-associated kinase regulator 2 isoform X2	Musa acuminata subsp. malaccensis	-	-	-	-	-	-	-	-	-	-	-	-	-	-	-
1656D_32824_c0_g1_i1	654	1656C;1656D	285	87	285	87	43.5797	13.4223	194.191	307.835	80.5463	0.261654	-1.93427	0.030658	0.848304	XP_020242388.1	10 kDa chaperonin, mitochondrial-like	Asparagus officinalis	-	-	-	-	-	-	-	-	-	-	-	-	-	-	-
1656D_32839_c0_g1_i1	977	1656C;1656D	278.287	49	278	49	22.7706	4.08354	172.82	300.274	45.3652	0.151079	-2.72662	0.00376096	0.267204	XP_020252878.1	flavonoid 3',5'-methyltransferase-like	Asparagus officinalis	-	-	-	-	-	-	-	-	-	-	-	-	-	-	-
1656D_32878_c0_g1_i1	790	1656C;1656D	32	2	32	2	3.59033	0.2275	18.2078	34.564	1.85164	0.0535714	-4.22239	0.00999251	0.492682	XP_022912525.1	ADP,ATP carrier protein 1-like	Onthophagus taurus	-	-	-	-	-	-	-	-	-	-	-	-	-	-	-
1656D_32937_c0_g1_i1	499	1656C;1656D	15	1	15	1	3.73016	0.251093	8.56384	16.2019	0.92582	0.0571429	-4.12928	0.0396939	0.945471	XP_026276302.1	uncharacterized protein LOC113205063	Frankliniella occidentalis	-	-	-	-	-	-	-	-	-	-	-	-	-	-	-
1656D_33012_c0_g1_i1	554	1656C;1656D	33	3	33	3	6.77027	0.621079	19.2108	35.6441	2.77746	0.0779221	-3.68182	0.016863	0.652611	OIW19871.1	hypothetical protein TanjilG_27238	Lupinus angustifolius	-	-	-	-	-	-	-	-	-	-	-	-	-	-	-
1656D_33025_c2_g1_i1	2345	1656C;1656D	328	1225	328	1225	8.99961	34.5008	744.205	354.28	1134.13	3.20122	1.67862	0.0358181	0.892724	XP_020274363.1	telomere repeat-binding protein 2-like isoform X1	Asparagus officinalis	-	-	-	-	-	-	-	-	-	-	-	-	-	-	-
1656D_33106_c0_g1_i1	1090	1656C;1656D	1067	124	1067	124	75.0228	8.89455	633.647	1152.49	114.802	0.0996117	-3.32754	0.000100994	0.0207598	OVA16518.1	Expansin	Macleaya cordata	A0A200R1G4	Expansin	BVC80_399g31	Macleaya cordata	-	-	-	-	cell wall [GO:0005618]; extracellular region [GO:0005576]; membrane [GO:0016020]; plant-type cell wall organization [GO:0009664]	GO:0005576; GO:0005618; GO:0009664; GO:0016020	plant-type cell wall organization [GO:0009664]	cell wall [GO:0005618]; extracellular region [GO:0005576]; membrane [GO:0016020]	-	SUBCELLULAR LOCATION: Membrane {ECO:0000256|SAAS:SAAS00562149}; Peripheral membrane protein {ECO:0000256|SAAS:SAAS00562149}. Secreted, cell wall {ECO:0000256|SAAS:SAAS00562144}.	-
1656D_33198_c0_g1_i1	2139	1656C;1656D	219.118	53.103	219	53	6.6808	1.6612	142.808	236.547	49.0685	0.207436	-2.26926	0.0171705	0.658309	XP_004500808.1	PREDICTED: transcription factor bHLH63-like	Cicer arietinum	A0A1S2Y7Z6	transcription factor bHLH63-like	LOC101493214	Cicer arietinum (Chickpea) (Garbanzo)	-	LOC101493214	-	-	protein dimerization activity [GO:0046983]	GO:0046983	-	-	protein dimerization activity [GO:0046983]	-	cam:101493214;
1656D_33198_c0_g1_i2	1272	1656C;1656D	1461.88	251.897	1462	252	83.7984	14.758	906.224	1579.14	233.307	0.147743	-2.75884	0.000894175	0.102579	XP_020251566.1	transcription factor bHLH63-like	Asparagus officinalis	-	-	-	-	-	-	-	-	-	-	-	-	-	-	-
1656D_33201_c0_g1_i1	452	1656C;1656D	1	19	1	19	0.296303	5.75759	9.33535	1.08012	17.5906	16.2857	4.02554	0.0435124	0.954003	-	-	-	-	-	-	-	-	-	-	-	-	-	-	-	-	-	-
1656D_33207_c0_g1_i1	691	1656C;1656D	26	1	26	1	3.62191	0.140858	14.5045	28.0832	0.92582	0.032967	-4.92283	0.00851295	0.44518	XP_020265407.1	cysteine protease XCP1-like	Asparagus officinalis	-	-	-	-	-	-	-	-	-	-	-	-	-	-	-
1656D_33220_c0_g1_i2	472	1656C;1656D	2	108	2	108	0.550456	30.1401	51.0744	2.16025	99.9886	46.2857	5.5325	0.00018695	0.03364	-	-	-	-	-	-	-	-	-	-	-	-	-	-	-	-	-	-
1656D_33264_c0_g3_i1	636	1656C;1656D	5	42	5	42	0.802897	6.79325	22.1425	5.40062	38.8844	7.2	2.848	0.0452302	0.981237	-	-	-	-	-	-	-	-	-	-	-	-	-	-	-	-	-	-
1656D_33294_c0_g1_i1	1323	1656C;1656D	119	18	119	18	6.4856	1.00307	72.5997	128.535	16.6648	0.129652	-2.94729	0.00834297	0.438488	XP_010911691.1	PREDICTED: uncharacterized protein LOC105037760	Elaeis guineensis	-	-	-	-	-	-	-	-	-	-	-	-	-	-	-
1656D_33342_c0_g2_i1	1133	1656C;1656D	43.9877	5.8522	44	6	2.93569	0.398651	26.5402	47.5254	5.55492	0.116883	-3.09686	0.02392	0.767531	XP_020273221.1	OTU domain-containing protein DDB_G0284757-like isoform X2	Asparagus officinalis	-	-	-	-	-	-	-	-	-	-	-	-	-	-	-
1656D_33384_c0_g1_i1	2804	1656C;1656D	4.05219	184	4	184	0.0909091	4.24026	87.3357	4.32049	170.351	39.4286	5.30117	3.32678e-05	0.00900039	XP_008791983.1	PREDICTED: protein HEADING DATE 3A-like	Phoenix dactylifera	A0A2H3Y1L7	protein HEADING DATE 3A-like	LOC103708701	Phoenix dactylifera (Date palm)	-	LOC103708701	-	-	phosphatidylethanolamine binding [GO:0008429]; photoperiodism, flowering [GO:0048573]; regulation of flower development [GO:0009909]	GO:0008429; GO:0009909; GO:0048573	photoperiodism, flowering [GO:0048573]; regulation of flower development [GO:0009909]	-	phosphatidylethanolamine binding [GO:0008429]	-	pda:103708701;
1656D_33388_c0_g1_i1	832	1656C;1656D	65	14	65	14	6.73181	1.47197	41.5848	70.208	12.9615	0.184615	-2.43741	0.0439621	0.962035	-	-	-	-	-	-	-	-	-	-	-	-	-	-	-	-	-	-
1656D_33434_c0_g1_i1	942	1656C;1656D	3.99629	37.0912	4	37	0.344462	3.25353	19.2879	4.32049	34.2553	7.92857	2.98706	0.0439077	0.961029	XP_020246446.1	NAC domain-containing protein 104	Asparagus officinalis	-	-	-	-	-	-	-	-	-	-	-	-	-	-	-
1656D_33434_c0_g2_i1	1123	1656C;1656D	23.0037	309.909	23	310	1.5536	21.361	155.924	24.8428	287.004	11.5528	3.53017	0.000428794	0.0608351	XP_020246446.1	NAC domain-containing protein 104	Asparagus officinalis	-	-	-	-	-	-	-	-	-	-	-	-	-	-	-
1656D_33443_c0_g2_i1	891	1656C;1656D	53.4869	2	53	2	4.99951	0.190042	29.5491	57.2465	1.85164	0.032345	-4.95031	0.00152389	0.145973	XP_020259351.1	uncharacterized protein LOC109835749	Asparagus officinalis	-	-	-	-	-	-	-	-	-	-	-	-	-	-	-
1656D_33449_c0_g1_i1	651	1656C;1656D	25	3	25	3	3.85292	0.466454	14.8903	27.0031	2.77746	0.102857	-3.28129	0.0383294	0.936879	-	-	-	-	-	-	-	-	-	-	-	-	-	-	-	-	-	-
1656D_33495_c0_g1_i1	609	1656C;1656D	1	24	1	24	0.173295	4.18892	11.6499	1.08012	22.2197	20.5714	4.36257	0.0239372	0.767531	-	-	-	-	-	-	-	-	-	-	-	-	-	-	-	-	-	-
1656D_33530_c0_g1_i1	956	1656C;1656D	633	3272	633	3272	53.4202	281.078	1856.5	683.718	3029.28	4.4306	2.1475	0.00991466	0.48968	XP_020277304.1	translationally-controlled tumor protein homolog	Asparagus officinalis	-	-	-	-	-	-	-	-	-	-	-	-	-	-	-
1656D_33535_c1_g1_i1	545	1656C;1656D	1	28	1	28	0.211302	5.97487	13.5015	1.08012	25.923	24	4.58496	0.0154896	0.61638	KDO38652.1	hypothetical protein CISIN_1g041873mg, partial	Citrus sinensis	A0A067DI19	Uncharacterized protein (Fragment)	CISIN_1g041873mg	Citrus sinensis (Sweet orange) (Citrus aurantium var. sinensis)	-	-	-	-	-	-	-	-	-	-	-
1656D_33565_c0_g1_i1	1018	1656C;1656D	47	224	47	224	3.63008	17.6324	129.075	50.7658	207.384	4.08511	2.03037	0.0350477	0.878261	XP_010922964.2	PREDICTED: uncharacterized protein LOC105046139	Elaeis guineensis	-	-	-	-	-	-	-	-	-	-	-	-	-	-	-
1656D_33619_c0_g1_i3	1477	1656C;1656D	14.7422	99.5225	15	100	0.699497	4.83327	54.3919	16.2019	92.582	5.71429	2.51457	0.0307404	0.849609	XP_020274274.1	beta-glucosidase 11-like	Asparagus officinalis	-	-	-	-	-	-	-	-	-	-	-	-	-	-	-
1656D_33628_c0_g1_i1	714	1656C;1656D	8	72	8	72	1.05532	9.6126	37.65	8.64099	66.659	7.71429	2.94753	0.021344	0.717393	XP_008805088.2	PREDICTED: RING-H2 finger protein ATL66-like	Phoenix dactylifera	A0A2H3YWV6	RING-H2 finger protein ATL66-like	LOC103718169	Phoenix dactylifera (Date palm)	-	LOC103718169	-	-	integral component of membrane [GO:0016021]	GO:0016021	-	integral component of membrane [GO:0016021]	-	-	pda:103718169;
1656D_33649_c1_g1_i1	919	1656C;1656D	4	45	4	45	0.357326	4.08901	22.9912	4.32049	41.6619	9.64286	3.26946	0.0246008	0.769545	XP_020274195.1	zinc finger BED domain-containing protein RICESLEEPER 1-like	Asparagus officinalis	-	-	-	-	-	-	-	-	-	-	-	-	-	-	-
1656D_33691_c0_g1_i1	1328	1656C;1656D	232	56	232	56	12.5835	3.1058	151.217	250.589	51.8459	0.206897	-2.27302	0.015949	0.625837	XP_020246892.1	WAT1-related protein At5g64700-like	Asparagus officinalis	-	-	-	-	-	-	-	-	-	-	-	-	-	-	-
1656D_33693_c0_g1_i1	479	1656C;1656D	18	1	18	1	4.81498	0.271299	10.184	19.4422	0.92582	0.047619	-4.39232	0.0249422	0.777278	XP_008799780.1	PREDICTED: uncharacterized protein LOC103714350	Phoenix dactylifera	A0A2H3YJL7	uncharacterized protein LOC103714350	LOC103714350	Phoenix dactylifera (Date palm)	-	LOC103714350	-	-	-	-	-	-	-	-	pda:103714350;
1656D_33718_c0_g2_i1	869	1656C;1656D	34	5	34	5	3.29814	0.492809	20.6766	36.7242	4.6291	0.12605	-2.98793	0.0374906	0.925228	XP_020274100.1	receptor-like serine/threonine-protein kinase NCRK	Asparagus officinalis	-	-	-	-	-	-	-	-	-	-	-	-	-	-	-
1656D_33718_c1_g1_i1	1109	1656C;1656D	50	7	50	7	3.43435	0.490622	30.2435	54.0062	6.48074	0.12	-3.05889	0.0215911	0.717393	XP_020274100.1	receptor-like serine/threonine-protein kinase NCRK	Asparagus officinalis	-	-	-	-	-	-	-	-	-	-	-	-	-	-	-
1656D_33719_c0_g1_i1	417	1656C;1656D	3.7818	61.6986	4	62	1.29177	21.686	30.8607	4.32049	57.4008	13.2857	3.7318	0.0082406	0.433736	KCW88515.1	hypothetical protein EUGRSUZ_A00899	Eucalyptus grandis	A0A059DE68	Uncharacterized protein	EUGRSUZ_A00899	Eucalyptus grandis (Flooded gum)	-	-	-	-	-	-	-	-	-	-	-
1656D_33719_c0_g1_i3	566	1656C;1656D	5.2182	72.3014	5	72	1.03006	14.3884	36.0298	5.40062	66.659	12.3429	3.6256	0.00746858	0.40915	KCW88515.1	hypothetical protein EUGRSUZ_A00899	Eucalyptus grandis	A0A059DE68	Uncharacterized protein	EUGRSUZ_A00899	Eucalyptus grandis (Flooded gum)	-	-	-	-	-	-	-	-	-	-	-
1656D_33756_c0_g1_i1	2641	1656C;1656D	283	45	283	45	6.78858	1.10857	173.668	305.675	41.6619	0.136295	-2.8752	0.00239378	0.197666	XP_020276742.1	uncharacterized protein LOC109851030 isoform X3	Asparagus officinalis	-	-	-	-	-	-	-	-	-	-	-	-	-	-	-
1656D_33774_c0_g1_i1	664	1656C;1656D	28	3	28	3	4.17236	0.451197	16.5105	30.2435	2.77746	0.0918367	-3.44478	0.0277889	0.808214	XP_026274034.1	upstream activation factor subunit spp27	Frankliniella occidentalis	-	-	-	-	-	-	-	-	-	-	-	-	-	-	-
1656D_33777_c0_g1_i1	1103	1656C;1656D	77.0031	13	77	13	5.32799	0.917787	47.6026	83.1695	12.0357	0.144712	-2.78874	0.0203496	0.717393	GAO47202.1	hypothetical protein G7K_1412-t1	Saitoella complicata NRRL Y-17804	A0A0E9NBE8	Uncharacterized protein	G7K_1412-t1	Saitoella complicata NRRL Y-17804	-	-	-	-	-	-	-	-	-	-	-
1656D_33938_c0_g1_i3	1271	1656C;1656D	96.4293	7.96649	96	8	5.53317	0.467207	55.5492	103.692	7.40656	0.0714286	-3.80735	0.00220198	0.187455	XP_020254525.1	uncharacterized protein LOC109831589	Asparagus officinalis	-	-	-	-	-	-	-	-	-	-	-	-	-	-	-
1656D_33938_c0_g1_i4	1513	1656C;1656D	200.571	14.0335	201	14	9.2374	0.661654	115.033	217.105	12.9615	0.0597015	-4.06609	0.000190279	0.0341857	XP_020254525.1	uncharacterized protein LOC109831589	Asparagus officinalis	-	-	-	-	-	-	-	-	-	-	-	-	-	-	-
1656D_33939_c0_g1_i1	736	1656C;1656D	57	4	57	4	7.15792	0.508426	32.6352	61.567	3.70328	0.0601504	-4.05528	0.00404812	0.280021	XP_023315677.1	uncharacterized protein LOC106659978	Trichogramma pretiosum	-	-	-	-	-	-	-	-	-	-	-	-	-	-	-
1656D_33944_c2_g1_i1	512	1656C;1656D	20	1	20	1	4.7389	0.239434	11.2641	21.6025	0.92582	0.0428571	-4.54432	0.0186875	0.675476	-	-	-	-	-	-	-	-	-	-	-	-	-	-	-	-	-	-
1656D_33960_c0_g1_i1	1029	1656C;1656D	40	5	40	5	3.04364	0.38781	23.917	43.2049	4.6291	0.107143	-3.22239	0.0227289	0.740674	XP_026284593.1	polyadenylate-binding protein 4-like	Frankliniella occidentalis	-	-	-	-	-	-	-	-	-	-	-	-	-	-	-
1656D_33962_c0_g1_i1	764	1656C;1656D	32	5	32	5	3.7855	0.599141	19.5965	34.564	4.6291	0.133929	-2.90046	0.0446738	0.973187	XP_020263717.1	stearoyl-[acyl-carrier-protein] 9-desaturase, chloroplastic-like	Asparagus officinalis	-	-	-	-	-	-	-	-	-	-	-	-	-	-	-
1656D_33978_c0_g1_i1	939	1656C;1656D	93	15	93	15	8.05305	1.32173	57.1694	100.451	13.8873	0.138249	-2.85466	0.0143039	0.600004	ONK79232.1	uncharacterized protein A4U43_C01F4270	Asparagus officinalis	-	-	-	-	-	-	-	-	-	-	-	-	-	-	-
1656D_33989_c0_g1_i1	1873	1656C;1656D	100	543	100	543	3.56026	19.8206	305.366	108.012	502.72	4.65429	2.21856	0.0095543	0.47414	-	-	-	-	-	-	-	-	-	-	-	-	-	-	-	-	-	-
1656D_33989_c1_g1_i1	2259	1656C;1656D	3748	20297	3748	20297	107.321	596.469	11419.8	4048.3	18791.4	4.64179	2.21468	0.0434807	0.954003	AAB71136.1	acid invertase	Asparagus officinalis	O04372	Acid invertase	-	Asparagus officinalis (Garden asparagus)	-	-	-	-	integral component of membrane [GO:0016021]; sucrose alpha-glucosidase activity [GO:0004575]; carbohydrate metabolic process [GO:0005975]	GO:0004575; GO:0005975; GO:0016021	carbohydrate metabolic process [GO:0005975]	integral component of membrane [GO:0016021]	sucrose alpha-glucosidase activity [GO:0004575]	-	-
1656D_34010_c0_g1_i1	2729	1656C;1656D	62.7858	546.964	63	547	1.45183	12.9905	287.236	68.0478	506.424	7.44218	2.89572	0.00109828	0.117914	XP_010247822.1	PREDICTED: probable protein phosphatase 2C 33	Nelumbo nucifera	A0A1U7Z649	probable protein phosphatase 2C 33	LOC104590775	Nelumbo nucifera (Sacred lotus)	-	LOC104590775	-	-	protein serine/threonine phosphatase activity [GO:0004722]	GO:0004722	-	-	protein serine/threonine phosphatase activity [GO:0004722]	-	nnu:104590775;
1656D_34010_c0_g1_i2	2160	1656C;1656D	514.214	2851.04	514	2851	15.5024	88.1925	1597.35	555.183	2639.51	4.75431	2.24924	0.00660683	0.382957	XP_009766558.1	PREDICTED: probable protein phosphatase 2C 33	Nicotiana sylvestris	A0A1U7VJQ3	probable protein phosphatase 2C 33	LOC104217915	Nicotiana sylvestris (Wood tobacco) (South American tobacco)	-	LOC104217915	-	-	protein serine/threonine phosphatase activity [GO:0004722]	GO:0004722	-	-	protein serine/threonine phosphatase activity [GO:0004722]	-	nsy:104217915;
1656D_34038_c0_g2_i1	592	1656C;1656D	16.1548	1.29703	16	1	2.9423	0.2381	9.1039	17.282	0.92582	0.0535714	-4.22239	0.0338303	0.861749	-	-	-	-	-	-	-	-	-	-	-	-	-	-	-	-	-	-
1656D_34038_c1_g1_i1	837	1656C;1656D	38	6	38	6	3.89976	0.625257	23.2998	41.0447	5.55492	0.135338	-2.88536	0.0379301	0.933482	-	-	-	-	-	-	-	-	-	-	-	-	-	-	-	-	-	-
1656D_34044_c1_g1_i1	631	1656C;1656D	1	18	1	18	0.162763	2.95183	8.87244	1.08012	16.6648	15.4286	3.94753	0.0494701	1	-	-	-	-	-	-	-	-	-	-	-	-	-	-	-	-	-	-
1656D_34172_c0_g1_i1	508	1656C;1656D	4	43	4	43	0.961621	10.4495	22.0654	4.32049	39.8103	9.21429	3.20387	0.0283047	0.812388	XP_020264444.1	cytochrome P450 71A9-like	Asparagus officinalis	-	-	-	-	-	-	-	-	-	-	-	-	-	-	-
1656D_34198_c0_g1_i1	514	1656C;1656D	20	1	20	1	4.70434	0.237626	11.2641	21.6025	0.92582	0.0428571	-4.54432	0.0186875	0.675476	XP_020697670.1	AAA-ATPase At4g30250-like	Dendrobium catenatum	-	-	-	-	-	-	-	-	-	-	-	-	-	-	-
1656D_34202_c0_g1_i1	542	1656C;1656D	15	1	15	1	3.20055	0.215585	8.56384	16.2019	0.92582	0.0571429	-4.12928	0.0396939	0.945471	XP_010513293.1	PREDICTED: uncharacterized protein LOC104789260	Camelina sativa	-	-	-	-	-	-	-	-	-	-	-	-	-	-	-
1656D_34283_c0_g1_i1	1064	1656C;1656D	3	35.6974	3	36	0.217993	2.64536	18.2849	3.24037	33.3295	10.2857	3.36257	0.0297229	0.830588	PRQ42077.1	putative RNA-directed DNA polymerase	Rosa chinensis	A0A2P6R6N0	Putative RNA-directed DNA polymerase (EC 2.7.7.49)	RchiOBHm_Chr3g0453691	Rosa chinensis (China rose)	-	-	2.7.7.49	-	nucleic acid binding [GO:0003676]; RNA-directed DNA polymerase activity [GO:0003964]; DNA integration [GO:0015074]	GO:0003676; GO:0003964; GO:0015074	DNA integration [GO:0015074]	-	nucleic acid binding [GO:0003676]; RNA-directed DNA polymerase activity [GO:0003964]	-	-
1656D_34283_c1_g1_i1	1800	1656C;1656D	7	113	7	113	0.261242	4.32265	56.0893	7.56086	104.618	13.8367	3.79043	0.00248307	0.204454	AFP55578.1	copia-type polyprotein	Rosa rugosa	J7FWR9	Copia-type polyprotein	-	Rosa rugosa (Rugosa rose)	-	-	-	-	nucleic acid binding [GO:0003676]; zinc ion binding [GO:0008270]; DNA integration [GO:0015074]	GO:0003676; GO:0008270; GO:0015074	DNA integration [GO:0015074]	-	nucleic acid binding [GO:0003676]; zinc ion binding [GO:0008270]	-	-
1656D_34325_c0_g1_i1	1056	1656C;1656D	7	58.5763	7	59	0.51394	4.38548	31.0921	7.56086	54.6234	7.22449	2.8529	0.0309441	0.852545	-	-	-	-	-	-	-	-	-	-	-	-	-	-	-	-	-	-
1656D_34337_c3_g1_i1	413	1656C;1656D	29.469	1.01939	29	1	10.224	0.36449	16.1247	31.3236	0.92582	0.0295567	-5.08037	0.00597686	0.362446	-	-	-	-	-	-	-	-	-	-	-	-	-	-	-	-	-	-
1656D_34399_c0_g1_i1	715	1656C;1656D	21	1	21	1	2.76375	0.133203	11.8042	22.6826	0.92582	0.0408163	-4.61471	0.0162553	0.634193	ONK72686.1	uncharacterized protein A4U43_C04F22030	Asparagus officinalis	-	-	-	-	-	-	-	-	-	-	-	-	-	-	-
1656D_34402_c0_g1_i1	1872	1656C;1656D	170.264	24	170	24	6.06569	0.876597	102.92	183.621	22.2197	0.121008	-3.04682	0.00367121	0.261632	XP_026278278.1	elongation factor 1-alpha-like	Frankliniella occidentalis	-	-	-	-	-	-	-	-	-	-	-	-	-	-	-
1656D_34488_c0_g1_i1	1403	1656C;1656D	31	268	31	268	1.56843	13.872	140.802	33.4838	248.12	7.41014	2.8895	0.00337524	0.251558	XP_008803788.1	PREDICTED: F-box protein At5g07610-like	Phoenix dactylifera	A0A2H3YTZ3	F-box protein At5g07610-like	LOC103717251	Phoenix dactylifera (Date palm)	-	LOC103717251	-	-	-	-	-	-	-	-	pda:103717251;
1656D_34490_c0_g1_i2	1680	1656C;1656D	276.902	1233.27	277	1233	11.2242	51.2169	720.365	299.194	1141.54	3.81537	1.93182	0.0166109	0.644801	XP_008802149.1	PREDICTED: protein STAY-GREEN, chloroplastic-like isoform X1	Phoenix dactylifera	A0A2H3YQW8	protein STAY-GREEN, chloroplastic-like isoform X1	LOC103716073	Phoenix dactylifera (Date palm)	-	LOC103716073	-	-	-	-	-	-	-	-	pda:103716073;
1656D_34490_c0_g1_i4	1651	1656C;1656D	12.0979	108.73	12	109	0.500811	4.61092	56.9379	12.9615	100.914	7.78571	2.96083	0.0122808	0.546446	XP_008802149.1	PREDICTED: protein STAY-GREEN, chloroplastic-like isoform X1	Phoenix dactylifera	A0A2H3YQW8	protein STAY-GREEN, chloroplastic-like isoform X1	LOC103716073	Phoenix dactylifera (Date palm)	-	LOC103716073	-	-	-	-	-	-	-	-	pda:103716073;
1656D_34498_c0_g1_i1	727	1656C;1656D	151	593	151	593	19.3416	76.8777	356.055	163.099	549.011	3.36613	1.75109	0.0349534	0.877991	-	-	-	-	-	-	-	-	-	-	-	-	-	-	-	-	-	-
1656D_345_c0_g2_i1	670	1656C;1656D	4327	1497	4327	1497	634.919	221.952	3029.82	4673.69	1385.95	0.296543	-1.75369	0.0411532	0.945471	-	-	-	-	-	-	-	-	-	-	-	-	-	-	-	-	-	-
1656D_34530_c1_g1_i1	605	1656C;1656D	1	26	1	26	0.175323	4.5917	12.5757	1.08012	24.0713	22.2857	4.47805	0.0191637	0.688808	-	-	-	-	-	-	-	-	-	-	-	-	-	-	-	-	-	-
1656D_34530_c1_g2_i1	1590	1656C;1656D	4	71	4	71	0.173337	3.15095	35.0269	4.32049	65.7332	15.2143	3.92735	0.00492054	0.318627	-	-	-	-	-	-	-	-	-	-	-	-	-	-	-	-	-	-
1656D_34542_c0_g1_i1	308	1656C;1656D	38	5	38	5	20.9525	2.92148	22.8369	41.0447	4.6291	0.112782	-3.14839	0.0267514	0.789742	ABN14988.1	polyubiquitin, partial	Taenia asiatica	A3F509	Polyubiquitin (Fragment)	-	Taenia asiatica (Asian tapeworm)	-	-	-	-	-	-	-	-	-	-	-
1656D_34557_c0_g1_i1	603	1656C;1656D	19	1	19	1	3.35094	0.177647	10.7241	20.5223	0.92582	0.0451128	-4.47032	0.0215513	0.717393	-	-	-	-	-	-	-	-	-	-	-	-	-	-	-	-	-	-
1656D_34612_c0_g1_i1	514	1656C;1656D	2	30	2	30	0.470434	7.12877	14.9674	2.16025	27.7746	12.8571	3.6845	0.0278686	0.808904	-	-	-	-	-	-	-	-	-	-	-	-	-	-	-	-	-	-
1656D_34706_c1_g1_i1	351	1656C;1656D	23	1	23	1	10.3502	0.475945	12.8843	24.8428	0.92582	0.0372671	-4.74595	0.0124263	0.546446	-	-	-	-	-	-	-	-	-	-	-	-	-	-	-	-	-	-
1656D_34738_c0_g1_i1	603	1656C;1656D	2	274	2	274	0.352731	48.6752	127.917	2.16025	253.675	117.429	6.87564	2.74734e-07	0.000210184	-	-	-	-	-	-	-	-	-	-	-	-	-	-	-	-	-	-
1656D_34748_c0_g1_i1	224	1656C;1656D	1	18	1	18	0.933159	17.8088	8.87244	1.08012	16.6648	15.4286	3.94753	0.0494701	1	-	-	-	-	-	-	-	-	-	-	-	-	-	-	-	-	-	-
1656D_34845_c0_g1_i1	2233	1656C;1656D	208	56	208	56	6.03551	1.66757	138.256	224.666	51.8459	0.230769	-2.11548	0.0262479	0.789742	XP_020277428.1	WEB family protein At3g02930, chloroplastic-like	Asparagus officinalis	-	-	-	-	-	-	-	-	-	-	-	-	-	-	-
1656D_34851_c0_g1_i1	1149	1656C;1656D	351	55	351	55	22.9906	3.67771	215.022	379.123	50.9201	0.13431	-2.89636	0.00159917	0.151402	AAF65845.1	aquaporin 1	Allium cepa	Q9M4T0	Aquaporin 1	Aqp1	Allium cepa (Onion)	-	Aqp1	-	-	integral component of membrane [GO:0016021]; channel activity [GO:0015267]	GO:0015267; GO:0016021	-	integral component of membrane [GO:0016021]	channel activity [GO:0015267]	-	-
1656D_34960_c0_g1_i1	1377	1656C;1656D	6735	726	6735	726	348.881	38.4681	3973.39	7274.63	672.145	0.0923958	-3.43603	0.000285705	0.0458406	XP_010918444.1	PREDICTED: protochlorophyllide reductase	Elaeis guineensis	-	-	-	-	-	-	-	-	-	-	-	-	-	-	-
1656D_34992_c1_g1_i1	1683	1656C;1656D	533	173	533	173	21.5586	7.16923	367.936	575.706	160.167	0.27821	-1.84576	0.0261015	0.789742	XP_020260836.1	tubulin beta chain-like	Asparagus officinalis	-	-	-	-	-	-	-	-	-	-	-	-	-	-	-
1656D_35003_c0_g2_i1	403	1656C;1656D	41.6902	2	42	2	15.0602	0.749788	23.6084	45.3652	1.85164	0.0408163	-4.61471	0.00384841	0.272078	XP_004507523.1	PREDICTED: auxin-induced protein 15A	Cicer arietinum	A0A1S2YNJ6	auxin-induced protein 15A	LOC101503322	Cicer arietinum (Chickpea) (Garbanzo)	-	LOC101503322	-	-	response to auxin [GO:0009733]	GO:0009733	response to auxin [GO:0009733]	-	-	-	cam:101503322;
1656D_35050_c0_g1_i1	2287	1656C;1656D	210	859	210	859	5.92903	24.8915	511.053	226.826	795.279	3.50612	1.80988	0.0258812	0.789742	XP_017248835.1	PREDICTED: probable inactive purple acid phosphatase 27	Daucus carota subsp. sativus	A0A164XGH0	Purple acid phosphatase (EC 3.1.3.2)	DCAR_016392 DCAR_016393	Daucus carota subsp. sativus	-	-	3.1.3.2	-	acid phosphatase activity [GO:0003993]; metal ion binding [GO:0046872]	GO:0003993; GO:0046872	-	-	acid phosphatase activity [GO:0003993]; metal ion binding [GO:0046872]	-	dcr:108219817;dcr:108223884;
1656D_35072_c0_g2_i1	880	1656C;1656D	2	51.3124	2	51	0.19041	4.96494	24.6885	2.16025	47.2168	21.8571	4.45003	0.00505772	0.321739	-	-	-	-	-	-	-	-	-	-	-	-	-	-	-	-	-	-
1656D_35084_c0_g1_i1	1396	1656C;1656D	65	1332	65	1332	3.3094	69.3777	651.7	70.208	1233.19	17.5648	4.13462	3.52546e-06	0.00159089	XP_020249172.1	probable inositol oxygenase	Asparagus officinalis	-	-	-	-	-	-	-	-	-	-	-	-	-	-	-
1656D_35089_c0_g1_i1	859	1656C;1656D	1.95635	30	2	30	0.19309	3.00779	14.9674	2.16025	27.7746	12.8571	3.6845	0.0278686	0.808904	XP_010679582.1	PREDICTED: uncharacterized protein LOC104894914	Beta vulgaris subsp. vulgaris	-	-	-	-	-	-	-	-	-	-	-	-	-	-	-
1656D_35100_c0_g1_i1	668	1656C;1656D	225	7	225	7	33.1843	1.04306	124.754	243.028	6.48074	0.0266667	-5.22882	6.71148e-06	0.00261462	XP_020260349.1	stress-response A/B barrel domain-containing protein At5g22580	Asparagus officinalis	-	-	-	-	-	-	-	-	-	-	-	-	-	-	-
1656D_35101_c0_g2_i1	1394	1656C;1656D	78.6086	13.6405	79	14	4.0095	0.711743	49.1456	85.3298	12.9615	0.151899	-2.71882	0.0223849	0.731734	XP_010932661.1	PREDICTED: beta-glucuronosyltransferase GlcAT14A	Elaeis guineensis	-	-	-	-	-	-	-	-	-	-	-	-	-	-	-
1656D_35127_c0_g1_i1	537	1656C;1656D	23	1	23	1	4.98904	0.219293	12.8843	24.8428	0.92582	0.0372671	-4.74595	0.0124263	0.546446	PKA59211.1	Putative 4-coumarate--CoA ligase-like 8	Apostasia shenzhenica	A0A2I0AUI9	4-coumarate--CoA ligase-like 8 (EC 6.2.1.-)	4CLL8 AXF42_Ash001304	Apostasia shenzhenica	-	4CLL8	6.2.1.-	-	integral component of membrane [GO:0016021]; ligase activity [GO:0016874]; metabolic process [GO:0008152]	GO:0008152; GO:0016021; GO:0016874	metabolic process [GO:0008152]	integral component of membrane [GO:0016021]	ligase activity [GO:0016874]	-	-
1656D_35144_c0_g2_i1	1552	1656C;1656D	106	9	106	9	4.7314	0.411337	61.4127	114.493	8.33238	0.0727763	-3.78039	0.0018786	0.168493	XP_020254906.1	probable polygalacturonase	Asparagus officinalis	-	-	-	-	-	-	-	-	-	-	-	-	-	-	-
1656D_35151_c0_g2_i1	561	1656C;1656D	33.5219	1	34	1	6.72101	0.20224	18.825	36.7242	0.92582	0.0252101	-5.30986	0.00346085	0.256326	-	-	-	-	-	-	-	-	-	-	-	-	-	-	-	-	-	-
1656D_35152_c0_g1_i1	838	1656C;1656D	6	440	6	440	0.614635	45.7702	206.921	6.48074	407.361	62.8571	5.974	1.05458e-07	9.82475e-05	ONK57448.1	uncharacterized protein A4U43_C09F620	Asparagus officinalis	-	-	-	-	-	-	-	-	-	-	-	-	-	-	-
1656D_35221_c1_g1_i1	520	1656C;1656D	24	3	24	3	5.52289	0.697952	14.3502	25.923	2.77746	0.107143	-3.22239	0.0428513	0.946152	-	-	-	-	-	-	-	-	-	-	-	-	-	-	-	-	-	-
1656D_35222_c1_g1_i1	836	1656C;1656D	34	180	34	180	3.49561	18.7914	101.686	36.7242	166.648	4.53782	2.182	0.0312769	0.859665	-	-	-	-	-	-	-	-	-	-	-	-	-	-	-	-	-	-
1656D_35222_c2_g1_i1	4163	1656C;1656D	122.818	717	123	717	1.78933	10.7422	398.334	132.855	663.813	4.99652	2.32092	0.00572734	0.349332	-	-	-	-	-	-	-	-	-	-	-	-	-	-	-	-	-	-
1656D_35237_c4_g1_i1	610	1656C;1656D	47	7	47	7	8.11992	1.21812	28.6233	50.7658	6.48074	0.12766	-2.96963	0.0265197	0.789742	-	-	-	-	-	-	-	-	-	-	-	-	-	-	-	-	-	-
1656D_35245_c0_g2_i1	469	1656C;1656D	18.8325	1.35338	19	1	5.24133	0.382351	10.7241	20.5223	0.92582	0.0451128	-4.47032	0.0215513	0.717393	-	-	-	-	-	-	-	-	-	-	-	-	-	-	-	-	-	-
1656D_35269_c0_g1_i1	990	1656C;1656D	6	158	6	158	0.481868	12.9267	76.3802	6.48074	146.28	22.5714	4.49643	0.000271382	0.04397	-	-	-	-	-	-	-	-	-	-	-	-	-	-	-	-	-	-
1656D_35281_c0_g3_i1	976	1656C;1656D	57.3407	258.112	57	258	4.69867	21.5413	150.214	61.567	238.862	3.8797	1.95594	0.0365075	0.907363	XP_010934269.1	PREDICTED: uncharacterized protein LOC105054460	Elaeis guineensis	-	-	-	-	-	-	-	-	-	-	-	-	-	-	-
1656D_35310_c0_g2_i1	1976	1656C;1656D	1063.77	366.116	1064	366	35.5635	12.553	744.051	1149.25	338.85	0.294844	-1.76198	0.0278841	0.809151	XP_020261740.1	abscisic acid 8'-hydroxylase 1-like	Asparagus officinalis	-	-	-	-	-	-	-	-	-	-	-	-	-	-	-
1656D_35340_c0_g2_i1	441	1656C;1656D	2	48	2	48	0.618019	15.2277	23.2998	2.16025	44.4394	20.5714	4.36257	0.0062973	0.374632	XP_018480958.1	PREDICTED: uncharacterized protein LOC108851976	Raphanus sativus	-	-	-	-	-	-	-	-	-	-	-	-	-	-	-
1656D_35366_c0_g1_i2	895	1656C;1656D	62.8892	359.937	63	360	5.83969	33.9797	200.672	68.0478	333.295	4.89796	2.29218	0.0112949	0.527195	ONK68577.1	uncharacterized protein A4U43_C05F13520	Asparagus officinalis	-	-	-	-	-	-	-	-	-	-	-	-	-	-	-
1656D_35371_c0_g1_i2	1870	1656C;1656D	74	689	74	689	2.63959	25.1973	358.91	79.9291	637.89	7.98069	2.99651	0.000592026	0.0770881	XP_020257114.1	LOW QUALITY PROTEIN: protein NRT1/ PTR FAMILY 2.9-like	Asparagus officinalis	-	-	-	-	-	-	-	-	-	-	-	-	-	-	-
1656D_35387_c0_g1_i1	2788	1656C;1656D	846	249	846	249	19.1011	5.77476	572.157	913.784	230.529	0.25228	-1.9869	0.0144653	0.602502	-	-	-	-	-	-	-	-	-	-	-	-	-	-	-	-	-	-
1656D_35413_c0_g1_i1	616	1656C;1656D	21	2	21	2	3.56586	0.342035	12.2671	22.6826	1.85164	0.0816327	-3.61471	0.0350473	0.878261	ONK72630.1	uncharacterized protein A4U43_C04F21400	Asparagus officinalis	-	-	-	-	-	-	-	-	-	-	-	-	-	-	-
1656D_35418_c0_g1_i1	659	1656C;1656D	770	297	770	297	116.215	45.2304	553.332	831.695	274.969	0.330612	-1.59679	0.0469352	1	XP_008781695.1	PREDICTED: chitinase-like protein 1	Phoenix dactylifera	A0A2H3XCE5	chitinase-like protein 1	LOC103701432	Phoenix dactylifera (Date palm)	-	LOC103701432	-	-	chitinase activity [GO:0004568]; carbohydrate metabolic process [GO:0005975]; cell wall macromolecule catabolic process [GO:0016998]; chitin catabolic process [GO:0006032]	GO:0004568; GO:0005975; GO:0006032; GO:0016998	carbohydrate metabolic process [GO:0005975]; cell wall macromolecule catabolic process [GO:0016998]; chitin catabolic process [GO:0006032]	-	chitinase activity [GO:0004568]	-	pda:103701432;
1656D_35418_c1_g1_i1	1297	1656C;1656D	3528	1007	3528	1007	197.228	57.5491	2371.49	3810.68	932.301	0.244655	-2.03118	0.0162803	0.634808	XP_020672809.1	chitinase-like protein 1	Dendrobium catenatum	-	-	-	-	-	-	-	-	-	-	-	-	-	-	-
1656D_35418_c2_g1_i1	750	1656C;1656D	895	349	895	349	109.052	43.0482	644.911	966.71	323.111	0.334238	-1.58105	0.0479119	1	AUW34374.1	chitinase-like protein 1	Lilium longiflorum	A0A2K9YNF7	Chitinase-like protein 1	CTL1	Lilium longiflorum (Trumpet lily)	-	CTL1	-	-	chitinase activity [GO:0004568]; carbohydrate metabolic process [GO:0005975]; cell wall macromolecule catabolic process [GO:0016998]; chitin catabolic process [GO:0006032]	GO:0004568; GO:0005975; GO:0006032; GO:0016998	carbohydrate metabolic process [GO:0005975]; cell wall macromolecule catabolic process [GO:0016998]; chitin catabolic process [GO:0006032]	-	chitinase activity [GO:0004568]	-	-
1656D_35421_c0_g1_i2	2739	1656C;1656D	216	982	216	982	4.97432	23.2279	571.231	233.307	909.155	3.89683	1.9623	0.0157306	0.619157	OVA10283.1	Transcription factor GRAS	Macleaya cordata	A0A200QIE7	Transcription factor GRAS	BVC80_1175g35	Macleaya cordata	-	-	-	-	regulation of transcription, DNA-templated [GO:0006355]; transcription, DNA-templated [GO:0006351]	GO:0006351; GO:0006355	regulation of transcription, DNA-templated [GO:0006355]; transcription, DNA-templated [GO:0006351]	-	-	-	-
1656D_35426_c0_g1_i2	1706	1656C;1656D	97	1.08607	97	1	3.85984	0.0442822	52.8489	104.772	0.92582	0.00883652	-6.82231	2.87049e-05	0.00812756	-	-	-	-	-	-	-	-	-	-	-	-	-	-	-	-	-	-
1656D_35555_c1_g1_i1	224	1656C;1656D	1	28	1	28	0.933159	27.7026	13.5015	1.08012	25.923	24	4.58496	0.0154896	0.61638	-	-	-	-	-	-	-	-	-	-	-	-	-	-	-	-	-	-
1656D_35567_c2_g1_i1	381	1656C;1656D	1	24	1	24	0.395698	9.94616	11.6499	1.08012	22.2197	20.5714	4.36257	0.0239372	0.767531	-	-	-	-	-	-	-	-	-	-	-	-	-	-	-	-	-	-
1656D_35609_c0_g1_i1	619	1656C;1656D	31	181	31	181	5.21736	30.696	100.529	33.4838	167.573	5.00461	2.32326	0.0229639	0.746645	XP_020248987.1	lipid transfer-like protein VAS isoform X1	Asparagus officinalis	-	-	-	-	-	-	-	-	-	-	-	-	-	-	-
1656D_35619_c3_g1_i1	929	1656C;1656D	2	30	2	30	0.175881	2.6841	14.9674	2.16025	27.7746	12.8571	3.6845	0.0278686	0.808904	XP_020260834.1	cellulose synthase-like protein D3	Asparagus officinalis	-	-	-	-	-	-	-	-	-	-	-	-	-	-	-
1656D_35659_c0_g1_i1	559	1656C;1656D	4	36	4	36	0.807224	7.32787	18.825	4.32049	33.3295	7.71429	2.94753	0.0473837	1	-	-	-	-	-	-	-	-	-	-	-	-	-	-	-	-	-	-
1656D_35659_c4_g1_i1	1092	1656C;1656D	5	57	5	57	0.350686	4.07857	29.0862	5.40062	52.7717	9.77143	3.28857	0.0173335	0.658309	-	-	-	-	-	-	-	-	-	-	-	-	-	-	-	-	-	-
1656D_35671_c0_g1_i1	1512	1656C;1656D	42	239	42	239	1.93591	11.2776	133.318	45.3652	221.271	4.87755	2.28616	0.0181452	0.660549	XP_009394142.1	PREDICTED: probable protein phosphatase 2C 51 isoform X1	Musa acuminata subsp. malaccensis	-	-	-	-	-	-	-	-	-	-	-	-	-	-	-
1656D_35680_c0_g1_i1	897	1656C;1656D	79.3626	3	79	3	7.34521	0.282298	44.0536	85.3298	2.77746	0.0325497	-4.94121	0.000532812	0.0713227	XP_020275524.1	probable protein phosphatase 2C 66	Asparagus officinalis	-	-	-	-	-	-	-	-	-	-	-	-	-	-	-
1656D_35703_c0_g2_i1	871	1656C;1656D	199	19	199	19	19.2377	1.86635	116.268	214.945	17.5906	0.0818378	-3.61109	0.000638026	0.0807295	XP_010929998.1	PREDICTED: uncharacterized protein LOC105051322	Elaeis guineensis	-	-	-	-	-	-	-	-	-	-	-	-	-	-	-
1656D_35746_c0_g1_i1	876	1656C;1656D	808	8	808	8	77.448	0.779255	440.073	872.74	7.40656	0.00848656	-6.8806	1.3303e-10	4.80248e-07	XP_017429474.1	PREDICTED: auxin-binding protein ABP19a-like	Vigna angularis	A0A0L9UYB3	Uncharacterized protein	LR48_Vigan07g139000	Phaseolus angularis (Azuki bean) (Vigna angularis)	-	-	-	-	extracellular region [GO:0005576]; manganese ion binding [GO:0030145]; nutrient reservoir activity [GO:0045735]	GO:0005576; GO:0030145; GO:0045735	-	extracellular region [GO:0005576]	manganese ion binding [GO:0030145]; nutrient reservoir activity [GO:0045735]	SUBCELLULAR LOCATION: Secreted {ECO:0000256|SAAS:SAAS00568926}.	var:108337455;
1656D_35748_c0_g1_i1	806	1656C;1656D	6	50.2249	6	50	0.652446	5.53983	26.3859	6.48074	46.291	7.14286	2.8365	0.0380173	0.935015	-	-	-	-	-	-	-	-	-	-	-	-	-	-	-	-	-	-
1656D_35764_c1_g1_i1	1509	1656C;1656D	25	156	25	156	1.15516	7.37903	85.7155	27.0031	144.428	5.34857	2.41915	0.0222937	0.729165	-	-	-	-	-	-	-	-	-	-	-	-	-	-	-	-	-	-
1656D_35788_c0_g1_i1	763	1656C;1656D	56	12	56	12	6.63853	1.44091	35.7984	60.4869	11.1098	0.183673	-2.44478	0.0493979	1	-	-	-	-	-	-	-	-	-	-	-	-	-	-	-	-	-	-
1656D_35812_c0_g2_i1	1249	1656C;1656D	462	60	462	60	27.116	3.59857	277.283	499.017	55.5492	0.111317	-3.16725	0.000433363	0.0609005	PKA63429.1	Leucine-rich repeat extensin-like protein 4	Apostasia shenzhenica	A0A2I0B6K1	Leucine-rich repeat extensin-like protein 4 (EC 2.7.11.1)	LRX4 AXF42_Ash005324	Apostasia shenzhenica	-	LRX4	2.7.11.1	-	transferase activity [GO:0016740]	GO:0016740	-	-	transferase activity [GO:0016740]	-	-
1656D_35812_c1_g1_i1	673	1656C;1656D	83	16	83	16	12.0871	2.35447	52.2317	89.6502	14.8131	0.165232	-2.59743	0.026369	0.789742	-	-	-	-	-	-	-	-	-	-	-	-	-	-	-	-	-	-
1656D_35812_c2_g1_i1	983	1656C;1656D	359	67	359	67	29.1217	5.53605	224.897	387.764	62.0299	0.159968	-2.64414	0.00335801	0.250921	-	-	-	-	-	-	-	-	-	-	-	-	-	-	-	-	-	-
1656D_35875_c0_g1_i3	2850	1656C;1656D	8.20068	76.1989	8	76	0.180677	1.72458	39.5017	8.64099	70.3623	8.14286	3.02554	0.0176424	0.658309	XP_020257744.1	LOW QUALITY PROTEIN: zinc finger protein BRUTUS-like	Asparagus officinalis	-	-	-	-	-	-	-	-	-	-	-	-	-	-	-
1656D_35882_c0_g2_i1	727	1656C;1656D	203	37	203	37	26.0023	4.79675	126.76	219.265	34.2553	0.156228	-2.67827	0.00683468	0.39399	-	-	-	-	-	-	-	-	-	-	-	-	-	-	-	-	-	-
1656D_35894_c0_g1_i1	527	1656C;1656D	20	1	20	1	4.49308	0.227096	11.2641	21.6025	0.92582	0.0428571	-4.54432	0.0186875	0.675476	-	-	-	-	-	-	-	-	-	-	-	-	-	-	-	-	-	-
1656D_35945_c1_g1_i1	1066	1656C;1656D	55	4.84127	55	5	3.98627	0.357851	32.0179	59.4068	4.6291	0.0779221	-3.68182	0.00743127	0.40915	-	-	-	-	-	-	-	-	-	-	-	-	-	-	-	-	-	-
1656D_35952_c0_g1_i3	3438	1656C;1656D	5247.16	1849.87	5247	1850	94.0334	34.0752	3690.09	5667.41	1712.77	0.302214	-1.72636	0.0494159	1	YP_009447921.1	ORF1+2p	Allium cepa amalgavirus 2	-	-	-	-	-	-	-	-	-	-	-	-	-	-	-
1656D_35952_c0_g1_i4	3364	1656C;1656D	737.844	274.131	738	274	13.5408	5.17069	525.403	797.131	253.675	0.318235	-1.65184	0.0405978	0.945471	YP_009447921.1	ORF1+2p	Allium cepa amalgavirus 2	-	-	-	-	-	-	-	-	-	-	-	-	-	-	-
1656D_35958_c1_g1_i1	1228	1656C;1656D	11.0015	133.393	11	133	0.660114	8.17739	67.5077	11.8814	123.134	10.3636	3.37346	0.00397881	0.278333	-	-	-	-	-	-	-	-	-	-	-	-	-	-	-	-	-	-
1656D_35978_c0_g1_i1	798	1656C;1656D	38.1375	3.64646	38	4	4.21199	0.408399	22.374	41.0447	3.70328	0.0902256	-3.47032	0.0176485	0.658309	XP_020265358.1	glycerophosphodiester phosphodiesterase GDPDL3-like	Asparagus officinalis	-	-	-	-	-	-	-	-	-	-	-	-	-	-	-
1656D_35992_c2_g1_i1	502	1656C;1656D	14	1	14	1	3.44183	0.248371	8.02377	15.1217	0.92582	0.0612245	-4.02975	0.0468499	1	OVA00898.1	Amino acid/polyamine transporter I	Macleaya cordata	A0A200PRV1	Amino acid/polyamine transporter I	BVC80_9081g60	Macleaya cordata	-	-	-	-	integral component of membrane [GO:0016021]; transmembrane transporter activity [GO:0022857]	GO:0016021; GO:0022857	-	integral component of membrane [GO:0016021]	transmembrane transporter activity [GO:0022857]	-	-
1656D_35995_c0_g2_i1	744	1656C;1656D	3	39	3	39	0.370258	4.87251	19.6737	3.24037	36.107	11.1429	3.47805	0.0234353	0.758133	-	-	-	-	-	-	-	-	-	-	-	-	-	-	-	-	-	-
1656D_36011_c1_g1_i1	1287	1656C;1656D	60	265	60	265	3.38775	15.2947	155.075	64.8074	245.342	3.78571	1.92057	0.0387183	0.94403	-	-	-	-	-	-	-	-	-	-	-	-	-	-	-	-	-	-
1656D_36020_c0_g1_i1	1356	1656C;1656D	26.2122	514.306	26	514	1.38449	27.7824	251.977	28.0832	475.872	16.9451	4.08279	2.11416e-05	0.00626235	XP_020267432.1	LOW QUALITY PROTEIN: nicotianamine synthase 3-like	Asparagus officinalis	-	-	-	-	-	-	-	-	-	-	-	-	-	-	-
1656D_36044_c1_g1_i1	773	1656C;1656D	15	1	15	1	1.74162	0.11766	8.56384	16.2019	0.92582	0.0571429	-4.12928	0.0396939	0.945471	OTF91248.1	putative enzymatic polyprotein	Helianthus annuus	A0A251RXY7	Putative enzymatic polyprotein (EC 2.7.7.49)	POL HannXRQ_Chr16g0508641	Helianthus annuus (Common sunflower)	-	POL	2.7.7.49	-	nucleic acid binding [GO:0003676]; RNA-directed DNA polymerase activity [GO:0003964]; RNA-DNA hybrid ribonuclease activity [GO:0004523]	GO:0003676; GO:0003964; GO:0004523	-	-	nucleic acid binding [GO:0003676]; RNA-directed DNA polymerase activity [GO:0003964]; RNA-DNA hybrid ribonuclease activity [GO:0004523]	-	-
1656D_36046_c0_g1_i1	606	1656C;1656D	14	151	14	151	2.44742	26.5892	77.4603	15.1217	139.799	9.2449	3.20866	0.00441341	0.298305	-	-	-	-	-	-	-	-	-	-	-	-	-	-	-	-	-	-
1656D_36057_c0_g1_i1	279	1656C;1656D	592.557	183.58	593	184	381.74	125.568	405.432	640.513	170.351	0.26596	-1.91072	0.0206267	0.717393	-	-	-	-	-	-	-	-	-	-	-	-	-	-	-	-	-	-
1656D_36057_c0_g3_i1	311	1656C;1656D	1861.88	457.795	1862	458	1011.67	263.374	1217.61	2011.19	424.026	0.210833	-2.24583	0.0060528	0.366474	XP_020255397.1	carbonic anhydrase 2-like isoform X1	Asparagus officinalis	-	-	-	-	-	-	-	-	-	-	-	-	-	-	-
1656D_36071_c2_g1_i1	688	1656C;1656D	1	25	1	25	0.140315	3.54686	12.1128	1.08012	23.1455	21.4286	4.42146	0.021391	0.717393	-	-	-	-	-	-	-	-	-	-	-	-	-	-	-	-	-	-
1656D_36091_c2_g1_i1	394	1656C;1656D	17	1	17	1	6.36864	0.390554	9.64396	18.3621	0.92582	0.0504202	-4.30986	0.0289824	0.813831	ESQ43915.1	hypothetical protein EUTSA_v10006118mg	Eutrema salsugineum	V4L0W2	Uncharacterized protein	EUTSA_v10006118mg	Eutrema salsugineum (Saltwater cress) (Sisymbrium salsugineum)	-	-	-	-	nucleus [GO:0005634]; DNA binding [GO:0003677]; DNA-binding transcription factor activity [GO:0003700]; transcription, DNA-templated [GO:0006351]	GO:0003677; GO:0003700; GO:0005634; GO:0006351	transcription, DNA-templated [GO:0006351]	nucleus [GO:0005634]	DNA binding [GO:0003677]; DNA-binding transcription factor activity [GO:0003700]	SUBCELLULAR LOCATION: Nucleus {ECO:0000256|PROSITE-ProRule:PRU00366, ECO:0000256|SAAS:SAAS00550310}.	eus:EUTSA_v10006118mg;
1656D_36110_c0_g1_i1	1106	1656C;1656D	44.3301	8	44	8	3.05605	0.562744	27.466	47.5254	7.40656	0.155844	-2.68182	0.0431809	0.952337	XP_021739781.1	uncharacterized protein LOC110706192	Chenopodium quinoa	-	-	-	-	-	-	-	-	-	-	-	-	-	-	-
1656D_36117_c0_g1_i1	828	1656C;1656D	394	92	394	92	41.1067	9.74333	255.372	425.569	85.1754	0.200145	-2.32088	0.00799143	0.42716	XP_020703715.1	transcription repressor OFP14-like	Dendrobium catenatum	-	-	-	-	-	-	-	-	-	-	-	-	-	-	-
1656D_36152_c0_g1_i1	519	1656C;1656D	2	34	2	34	0.461884	7.93778	16.8191	2.16025	31.4779	14.5714	3.86507	0.019384	0.694997	-	-	-	-	-	-	-	-	-	-	-	-	-	-	-	-	-	-
1656D_36188_c0_g1_i1	1181	1656C;1656D	281	93	281	93	17.7469	5.99814	194.808	303.515	86.1013	0.283681	-1.81766	0.0413389	0.945471	XP_020267841.1	coiled-coil domain-containing protein 130-like	Asparagus officinalis	-	-	-	-	-	-	-	-	-	-	-	-	-	-	-
1656D_36194_c0_g3_i1	923	1656C;1656D	6	310	6	310	0.532619	27.9939	146.742	6.48074	287.004	44.2857	5.46877	2.20481e-06	0.0010747	XP_023910549.1	protein GLUTAMINE DUMPER 3	Quercus suber	-	-	-	-	-	-	-	-	-	-	-	-	-	-	-
1656D_36196_c0_g1_i1	2557	1656C;1656D	6	384	6	384	0.149253	9.80861	180.998	6.48074	355.515	54.8571	5.77761	3.55183e-07	0.000249182	XP_020274313.1	protein BREAST CANCER SUSCEPTIBILITY 1 homolog	Asparagus officinalis	-	-	-	-	-	-	-	-	-	-	-	-	-	-	-
1656D_36238_c0_g2_i1	1393	1656C;1656D	120	33	120	33	6.12623	1.72344	80.0834	129.615	30.5521	0.235714	-2.08489	0.0476308	1	OAY72166.1	putative pectate lyase 21	Ananas comosus	A0A199V5K3	Pectate lyase (EC 4.2.2.2)	ACMD2_02260	Ananas comosus (Pineapple) (Ananas ananas)	-	-	4.2.2.2	PATHWAY: Glycan metabolism; pectin degradation; 2-dehydro-3-deoxy-D-gluconate from pectin: step 2/5. {ECO:0000256|RuleBase:RU361123}.	metal ion binding [GO:0046872]; pectate lyase activity [GO:0030570]; pectin catabolic process [GO:0045490]	GO:0030570; GO:0045490; GO:0046872	pectin catabolic process [GO:0045490]	-	metal ion binding [GO:0046872]; pectate lyase activity [GO:0030570]	-	-
1656D_36239_c0_g1_i1	1607	1656C;1656D	143.304	600.844	143	601	6.13001	26.324	355.438	154.458	556.418	3.6024	1.84896	0.0264592	0.789742	XP_020244218.1	LOW QUALITY PROTEIN: GDSL esterase/lipase At1g09390-like	Asparagus officinalis	-	-	-	-	-	-	-	-	-	-	-	-	-	-	-
1656D_36239_c0_g1_i2	1496	1656C;1656D	4.69592	41.1564	5	41	0.219314	1.96755	21.6796	5.40062	37.9586	7.02857	2.81323	0.0484474	1	XP_020244218.1	LOW QUALITY PROTEIN: GDSL esterase/lipase At1g09390-like	Asparagus officinalis	-	-	-	-	-	-	-	-	-	-	-	-	-	-	-
1656D_36252_c0_g1_i1	2776	1656C;1656D	72	338	72	338	1.63346	7.8765	195.348	77.7689	312.927	4.02381	2.00856	0.0253683	0.785614	XP_020262027.1	protein STICHEL-like isoform X1	Asparagus officinalis	-	-	-	-	-	-	-	-	-	-	-	-	-	-	-
1656D_36275_c0_g1_i1	1972	1656C;1656D	214	41	214	41	7.17136	1.40908	134.553	231.146	37.9586	0.164219	-2.60631	0.00759957	0.413917	XP_020274058.1	L-ascorbate oxidase homolog	Asparagus officinalis	-	-	-	-	-	-	-	-	-	-	-	-	-	-	-
1656D_36295_c1_g1_i1	1792	1656C;1656D	10	103	10	103	0.375186	3.96094	53.0804	10.8012	95.3595	8.82857	3.14218	0.00955487	0.47414	XP_020269792.1	ABC transporter C family member 10-like	Asparagus officinalis	-	-	-	-	-	-	-	-	-	-	-	-	-	-	-
1656D_36308_c4_g1_i1	204	1656C;1656D	1	22	1	22	1.12161	25.8991	10.7241	1.08012	20.368	18.8571	4.23704	0.0301702	0.838624	XP_019702404.1	PREDICTED: LOW QUALITY PROTEIN: isoflavone 3'-hydroxylase-like	Elaeis guineensis	-	-	-	-	-	-	-	-	-	-	-	-	-	-	-
1656D_36309_c0_g1_i1	1811	1656C;1656D	16	105	16	105	0.592814	3.98779	57.2465	17.282	97.2111	5.625	2.49185	0.0304007	0.843813	XP_020251415.1	cation/H(+) antiporter 15-like	Asparagus officinalis	-	-	-	-	-	-	-	-	-	-	-	-	-	-	-
1656D_36338_c0_g2_i1	844	1656C;1656D	0.712373	19.2849	1	19	0.0721891	1.98479	9.33535	1.08012	17.5906	16.2857	4.02554	0.0435124	0.954003	-	-	-	-	-	-	-	-	-	-	-	-	-	-	-	-	-	-
1656D_3642_c0_g1_i1	339	1656C;1656D	14	1	14	1	6.6543	0.503304	8.02377	15.1217	0.92582	0.0612245	-4.02975	0.0468499	1	-	-	-	-	-	-	-	-	-	-	-	-	-	-	-	-	-	-
1656D_36439_c0_g1_i1	1114	1656C;1656D	68	11	68	11	4.64248	0.766362	41.8162	73.4484	10.184	0.138655	-2.85042	0.0210615	0.717393	-	-	-	-	-	-	-	-	-	-	-	-	-	-	-	-	-	-
1656D_36439_c1_g1_i1	802	1656C;1656D	52	5	52	5	5.69842	0.555715	30.3978	56.1664	4.6291	0.0824176	-3.6009	0.00916238	0.457217	-	-	-	-	-	-	-	-	-	-	-	-	-	-	-	-	-	-
1656D_36464_c0_g1_i1	368	1656C;1656D	20.2762	1	20	1	8.45644	0.439026	11.2641	21.6025	0.92582	0.0428571	-4.54432	0.0186875	0.675476	-	-	-	-	-	-	-	-	-	-	-	-	-	-	-	-	-	-
1656D_36477_c0_g2_i1	628	1656C;1656D	1	57	1	57	0.1641	9.42524	26.9259	1.08012	52.7717	48.8571	5.6105	0.00133122	0.133023	XP_011022036.1	PREDICTED: serine carboxypeptidase-like 34	Populus euphratica	-	-	-	-	-	-	-	-	-	-	-	-	-	-	-
1656D_36487_c0_g1_i1	1884	1656C;1656D	5236.96	1322.91	5237	1323	185.166	47.9581	3440.73	5656.61	1224.86	0.216536	-2.20732	0.0125937	0.553598	XP_020265168.1	vacuolar-processing enzyme-like	Asparagus officinalis	-	-	-	-	-	-	-	-	-	-	-	-	-	-	-
1656D_36491_c0_g1_i1	1044	1656C;1656D	62	7	62	7	4.62418	0.532292	36.7242	66.9677	6.48074	0.0967742	-3.36923	0.0100223	0.492757	-	-	-	-	-	-	-	-	-	-	-	-	-	-	-	-	-	-
1656D_36500_c1_g1_i2	558	1656C;1656D	5.17007	43.9319	5	44	1.04677	8.97289	23.0684	5.40062	40.7361	7.54286	2.91511	0.0395018	0.945471	-	-	-	-	-	-	-	-	-	-	-	-	-	-	-	-	-	-
1656D_36553_c1_g1_i1	782	1656C;1656D	35	5	35	5	3.98994	0.577785	21.2167	37.8043	4.6291	0.122449	-3.02975	0.0344033	0.866625	-	-	-	-	-	-	-	-	-	-	-	-	-	-	-	-	-	-
1656D_36553_c2_g1_i1	680	1656C;1656D	25	3	25	3	3.57828	0.433871	14.8903	27.0031	2.77746	0.102857	-3.28129	0.0383294	0.936879	-	-	-	-	-	-	-	-	-	-	-	-	-	-	-	-	-	-
1656D_36580_c0_g2_i1	3380	1656C;1656D	99	607	99	607	1.80743	11.3902	334.453	106.932	561.973	5.25541	2.3938	0.00509571	0.323799	XP_009388070.2	PREDICTED: MDIS1-interacting receptor like kinase 2-like	Musa acuminata subsp. malaccensis	-	-	-	-	-	-	-	-	-	-	-	-	-	-	-
1656D_36601_c1_g1_i1	507	1656C;1656D	1	21	1	21	0.241357	5.12039	10.2612	1.08012	19.4422	18	4.16993	0.0339915	0.861749	-	-	-	-	-	-	-	-	-	-	-	-	-	-	-	-	-	-
1656D_36604_c0_g2_i1	1067	1656C;1656D	79	16	79	16	5.7184	1.18117	50.0714	85.3298	14.8131	0.173599	-2.52617	0.0315108	0.861749	-	-	-	-	-	-	-	-	-	-	-	-	-	-	-	-	-	-
1656D_36624_c0_g1_i1	943	1656C;1656D	3	34	3	34	0.258192	2.97788	17.3591	3.24037	31.4779	9.71429	3.28011	0.0350116	0.878261	-	-	-	-	-	-	-	-	-	-	-	-	-	-	-	-	-	-
1656D_36657_c0_g1_i1	1281	1656C;1656D	15.8273	720.474	16	720	0.899044	41.8317	341.936	17.282	666.59	38.5714	5.26946	1.19683e-07	0.000108016	XP_020244238.1	metacaspase-9	Asparagus officinalis	-	-	-	-	-	-	-	-	-	-	-	-	-	-	-
1656D_36657_c0_g1_i2	965	1656C;1656D	2.17269	151.526	2	152	0.180925	12.8486	71.4425	2.16025	140.725	65.1429	6.02554	2.45544e-05	0.00709144	XP_020244238.1	metacaspase-9	Asparagus officinalis	-	-	-	-	-	-	-	-	-	-	-	-	-	-	-
1656D_3667_c0_g1_i1	483	1656C;1656D	1	19	1	19	0.263834	5.07456	9.33535	1.08012	17.5906	16.2857	4.02554	0.0435124	0.954003	-	-	-	-	-	-	-	-	-	-	-	-	-	-	-	-	-	-
1656D_36695_c3_g1_i1	273	1656C;1656D	17	1	17	1	11.3863	0.71128	9.64396	18.3621	0.92582	0.0504202	-4.30986	0.0289824	0.813831	-	-	-	-	-	-	-	-	-	-	-	-	-	-	-	-	-	-
1656D_36696_c0_g1_i2	1092	1656C;1656D	2224.82	739.842	2225	740	156.043	52.9385	1544.19	2403.27	685.107	0.285072	-1.8106	0.026173	0.789742	BAB88746.1	trypsin inhibitor	Allium cepa	Q8RVY7	Trypsin inhibitor	OTI	Allium cepa (Onion)	-	OTI	-	-	extracellular region [GO:0005576]; serine-type endopeptidase inhibitor activity [GO:0004867]	GO:0004867; GO:0005576	-	extracellular region [GO:0005576]	serine-type endopeptidase inhibitor activity [GO:0004867]	-	-
1656D_36715_c0_g1_i1	930	1656C;1656D	42	4	42	4	3.68775	0.35733	24.5342	45.3652	3.70328	0.0816327	-3.61471	0.0126164	0.554048	XP_010684619.1	PREDICTED: uncharacterized protein LOC104899180	Beta vulgaris subsp. vulgaris	-	-	-	-	-	-	-	-	-	-	-	-	-	-	-
1656D_36724_c0_g1_i1	1131	1656C;1656D	161	25	161	25	10.7704	1.70699	98.5227	173.9	23.1455	0.133097	-2.90945	0.00559328	0.342657	XP_008782021.1	PREDICTED: aspartyl protease AED3-like	Phoenix dactylifera	A0A2H3XDB4	aspartyl protease AED3-like	LOC103701652	Phoenix dactylifera (Date palm)	-	LOC103701652	-	-	aspartic-type endopeptidase activity [GO:0004190]	GO:0004190	-	-	aspartic-type endopeptidase activity [GO:0004190]	-	pda:103701652;
1656D_36741_c0_g1_i1	1146	1656C;1656D	238	25	238	25	15.6435	1.67747	140.107	257.069	23.1455	0.090036	-3.47335	0.000608538	0.0783039	XP_008803788.1	PREDICTED: F-box protein At5g07610-like	Phoenix dactylifera	A0A2H3YTZ3	F-box protein At5g07610-like	LOC103717251	Phoenix dactylifera (Date palm)	-	LOC103717251	-	-	-	-	-	-	-	-	pda:103717251;
1656D_36753_c2_g1_i1	261	1656C;1656D	14	1	14	1	10.1072	0.764179	8.02377	15.1217	0.92582	0.0612245	-4.02975	0.0468499	1	-	-	-	-	-	-	-	-	-	-	-	-	-	-	-	-	-	-
1656D_36776_c0_g1_i1	1067	1656C;1656D	2.29975	32.6282	2	33	0.166467	2.40872	16.3562	2.16025	30.5521	14.1429	3.822	0.0211795	0.717393	XP_020250606.1	single-stranded DNA-binding protein WHY1, chloroplastic-like isoform X2	Asparagus officinalis	-	-	-	-	-	-	-	-	-	-	-	-	-	-	-
1656D_36777_c0_g1_i1	1676	1656C;1656D	981.836	142	982	142	39.9132	5.91405	596.074	1060.68	131.466	0.123945	-3.01222	0.000365272	0.0544476	XP_015889104.1	ectonucleotide pyrophosphatase/phosphodiesterase family member 1	Ziziphus jujuba	-	-	-	-	-	-	-	-	-	-	-	-	-	-	-
1656D_36812_c0_g1_i1	948	1656C;1656D	82.1099	7.04504	82	7	7.01326	0.61243	47.5254	88.5701	6.48074	0.0731707	-3.77259	0.00320166	0.24195	XP_020600250.1	uncharacterized protein LOC110039503	Phalaenopsis equestris	-	-	-	-	-	-	-	-	-	-	-	-	-	-	-
1656D_36843_c0_g2_i2	443	1656C;1656D	1.05927	46	1	46	0.32476	14.4796	21.8339	1.08012	42.5877	39.4286	5.30117	0.00305707	0.237395	-	-	-	-	-	-	-	-	-	-	-	-	-	-	-	-	-	-
1656D_36849_c0_g1_i1	1991	1656C;1656D	361.122	95	361	95	11.9667	3.22872	238.939	389.925	87.9529	0.225564	-2.14839	0.0142269	0.596992	XP_020261753.1	LOW QUALITY PROTEIN: L-ascorbate oxidase homolog	Asparagus officinalis	-	-	-	-	-	-	-	-	-	-	-	-	-	-	-
1656D_36853_c0_g1_i1	670	1656C;1656D	998	187	998	187	146.441	27.7254	625.546	1077.96	173.128	0.160607	-2.63839	0.00148543	0.142525	-	-	-	-	-	-	-	-	-	-	-	-	-	-	-	-	-	-
1656D_36870_c0_g1_i2	299	1656C;1656D	3	35	3	35	1.72722	21.4567	17.822	3.24037	32.4037	10	3.32193	0.0322409	0.861749	WP_094833348.1	hypothetical protein	Klebsiella pneumoniae	-	-	-	-	-	-	-	-	-	-	-	-	-	-	-
1656D_36899_c1_g1_i1	458	1656C;1656D	26	2	26	2	7.53386	0.59105	14.9674	28.0832	1.85164	0.0659341	-3.92283	0.019119	0.688808	-	-	-	-	-	-	-	-	-	-	-	-	-	-	-	-	-	-
1656D_36908_c0_g1_i2	637	1656C;1656D	1218	359	1218	359	195.031	57.9226	823.98	1315.59	332.369	0.252639	-1.98485	0.0138389	0.586679	-	-	-	-	-	-	-	-	-	-	-	-	-	-	-	-	-	-
1656D_36950_c0_g1_i1	373	1656C;1656D	23	2	23	2	9.4064	0.858228	13.3472	24.8428	1.85164	0.0745342	-3.74595	0.0272676	0.796061	-	-	-	-	-	-	-	-	-	-	-	-	-	-	-	-	-	-
1656D_36952_c2_g1_i1	468	1656C;1656D	34	1	34	1	9.50334	0.283533	18.825	36.7242	0.92582	0.0252101	-5.30986	0.00346085	0.256326	KGN59833.1	hypothetical protein Csa_3G849890	Cucumis sativus	A0A0A0LDG2	Uncharacterized protein	Csa_3G849890	Cucumis sativus (Cucumber)	-	-	-	-	nucleus [GO:0005634]; DNA binding [GO:0003677]; regulation of transcription, DNA-templated [GO:0006355]	GO:0003677; GO:0005634; GO:0006355	regulation of transcription, DNA-templated [GO:0006355]	nucleus [GO:0005634]	DNA binding [GO:0003677]	SUBCELLULAR LOCATION: Nucleus {ECO:0000256|PROSITE-ProRule:PRU00071}.	-
1656D_36982_c0_g1_i1	1067	1656C;1656D	20	352	20	352	1.4477	25.9857	173.746	21.6025	325.889	15.0857	3.91511	0.000100126	0.0207234	XP_010938192.1	PREDICTED: transcription factor MYB108-like	Elaeis guineensis	-	-	-	-	-	-	-	-	-	-	-	-	-	-	-
1656D_37015_c0_g1_i1	2165	1656C;1656D	466	141	466	141	14.0114	4.35006	316.939	503.338	130.541	0.25935	-1.94703	0.0209515	0.717393	XP_020261343.1	LOW QUALITY PROTEIN: vacuolar amino acid transporter 1-like	Asparagus officinalis	-	-	-	-	-	-	-	-	-	-	-	-	-	-	-
1656D_37065_c0_g1_i1	321	1656C;1656D	44	7	44	7	22.8009	3.83477	27.0031	47.5254	6.48074	0.136364	-2.87447	0.0327903	0.861749	-	-	-	-	-	-	-	-	-	-	-	-	-	-	-	-	-	-
1656D_37078_c2_g1_i1	401	1656C;1656D	19	1	19	1	6.92471	0.378334	10.7241	20.5223	0.92582	0.0451128	-4.47032	0.0215513	0.717393	ONK65544.1	uncharacterized protein A4U43_C07F38190	Asparagus officinalis	-	-	-	-	-	-	-	-	-	-	-	-	-	-	-
1656D_37087_c1_g1_i2	815	1656C;1656D	48	9	48	9	5.13116	0.976248	30.0892	51.8459	8.33238	0.160714	-2.63743	0.0423288	0.945471	XP_015382256.1	uncharacterized protein LOC107175359, partial	Citrus sinensis	-	-	-	-	-	-	-	-	-	-	-	-	-	-	-
1656D_371_c0_g1_i1	502	1656C;1656D	14	1	14	1	3.44183	0.248371	8.02377	15.1217	0.92582	0.0612245	-4.02975	0.0468499	1	ONK74218.1	uncharacterized protein A4U43_C03F4010	Asparagus officinalis	-	-	-	-	-	-	-	-	-	-	-	-	-	-	-
1656D_37104_c0_g2_i1	1140	1656C;1656D	1321	341	1321	341	87.4385	23.0401	871.274	1426.84	315.705	0.221261	-2.17618	0.00734162	0.40915	XP_010910383.1	PREDICTED: probable xyloglucan endotransglucosylase/hydrolase protein B	Elaeis guineensis	-	-	-	-	-	-	-	-	-	-	-	-	-	-	-
1656D_37111_c0_g1_i1	832	1656C;1656D	31	2	31	2	3.21056	0.210281	17.6677	33.4838	1.85164	0.0552995	-4.17659	0.0110804	0.518651	-	-	-	-	-	-	-	-	-	-	-	-	-	-	-	-	-	-
1656D_37117_c0_g1_i1	941	1656C;1656D	8	93	8	93	0.690617	8.16998	47.3711	8.64099	86.1013	9.96429	3.31677	0.0081881	0.431526	YP_008757353.1	NADH dehydrogenase subunit 9 (mitochondrion)	Aegilops speltoides	U3TRY7	NADH dehydrogenase subunit 9	nad9	Aegilops speltoides (Goatgrass) (Triticum speltoides)	-	nad9	-	-	mitochondrion [GO:0005739]; NADH dehydrogenase (ubiquinone) activity [GO:0008137]	GO:0005739; GO:0008137	-	mitochondrion [GO:0005739]	NADH dehydrogenase (ubiquinone) activity [GO:0008137]	-	-
1656D_37129_c3_g1_i1	876	1656C;1656D	39	1	39	1	3.73821	0.0974069	21.5253	42.1248	0.92582	0.021978	-5.50779	0.00208978	0.180971	-	-	-	-	-	-	-	-	-	-	-	-	-	-	-	-	-	-
1656D_37142_c0_g1_i1	845	1656C;1656D	355	1367	355	1367	35.9099	140.442	824.52	383.444	1265.6	3.3006	1.72273	0.0313017	0.860142	ABF61870.1	chaperone	Agave tequilana	A4ZF53	Chaperone	-	Agave tequilana (Tequila agave)	-	-	-	-	-	-	-	-	-	-	-
1656D_37173_c0_g1_i1	1030	1656C;1656D	23.0212	2.70406	23	3	1.74935	0.209453	13.8101	24.8428	2.77746	0.111801	-3.16099	0.0480215	1	ONK56621.1	uncharacterized protein A4U43_C10F10820	Asparagus officinalis	-	-	-	-	-	-	-	-	-	-	-	-	-	-	-
1656D_37173_c0_g2_i1	1602	1656C;1656D	243.979	22.2959	244	22	10.4762	0.980513	141.959	263.55	20.368	0.0772834	-3.6937	0.000308271	0.0478658	XP_008790157.1	PREDICTED: probable polygalacturonase	Phoenix dactylifera	A0A2H3XXG6	probable polygalacturonase	LOC103707418	Phoenix dactylifera (Date palm)	-	LOC103707418	-	-	extracellular region [GO:0005576]; polygalacturonase activity [GO:0004650]; carbohydrate metabolic process [GO:0005975]; cell wall organization [GO:0071555]	GO:0004650; GO:0005576; GO:0005975; GO:0071555	carbohydrate metabolic process [GO:0005975]; cell wall organization [GO:0071555]	extracellular region [GO:0005576]	polygalacturonase activity [GO:0004650]	SUBCELLULAR LOCATION: Secreted {ECO:0000256|SAAS:SAAS00564398}.	pda:103707418;
1656D_37176_c5_g1_i1	469	1656C;1656D	16	1	16	1	4.45301	0.282516	9.1039	17.282	0.92582	0.0535714	-4.22239	0.0338303	0.861749	XP_022984606.1	DNA mismatch repair protein MSH3	Cucurbita maxima	-	-	-	-	-	-	-	-	-	-	-	-	-	-	-
1656D_37200_c0_g1_i1	521	1656C;1656D	1.01082	41.6096	1	42	0.231764	9.64689	19.9823	1.08012	38.8844	36	5.16993	0.00423613	0.287694	-	-	-	-	-	-	-	-	-	-	-	-	-	-	-	-	-	-
1656D_37237_c0_g1_i1	440	1656C;1656D	18.4558	1.31981	18	1	5.72599	0.420445	10.184	19.4422	0.92582	0.047619	-4.39232	0.0249422	0.777278	ABN14989.1	polyubiquitin, partial	Taenia asiatica	A3F510	Polyubiquitin (Fragment)	-	Taenia asiatica (Asian tapeworm)	-	-	-	-	-	-	-	-	-	-	-
1656D_37243_c0_g2_i1	571	1656C;1656D	28.0537	3	28	3	5.45305	0.587512	16.5105	30.2435	2.77746	0.0918367	-3.44478	0.0277889	0.808214	-	-	-	-	-	-	-	-	-	-	-	-	-	-	-	-	-	-
1656D_37250_c0_g1_i2	2956	1656C;1656D	207.08	54.4136	207	54	4.38119	1.18276	136.79	223.586	49.9943	0.223602	-2.16099	0.023689	0.765698	ONK80625.1	uncharacterized protein A4U43_C01F19920	Asparagus officinalis	-	-	-	-	-	-	-	-	-	-	-	-	-	-	-
1656D_37250_c1_g1_i1	1796	1656C;1656D	87	20	87	20	3.25547	0.767087	56.2436	93.9707	18.5164	0.197044	-2.34341	0.0397278	0.945471	XP_008804056.1	PREDICTED: ABC transporter G family member 31	Phoenix dactylifera	A0A2H3YUL5	ABC transporter G family member 31	LOC103717446	Phoenix dactylifera (Date palm)	-	LOC103717446	-	-	integral component of membrane [GO:0016021]; ATP binding [GO:0005524]; ATPase activity [GO:0016887]	GO:0005524; GO:0016021; GO:0016887	-	integral component of membrane [GO:0016021]	ATPase activity [GO:0016887]; ATP binding [GO:0005524]	-	pda:103717446;
1656D_37305_c0_g1_i1	438	1656C;1656D	12	110	12	110	3.75376	35.3602	57.4008	12.9615	101.84	7.85714	2.974	0.0118285	0.541803	-	-	-	-	-	-	-	-	-	-	-	-	-	-	-	-	-	-
1656D_37322_c0_g2_i2	620	1656C;1656D	4	47	4	47	0.671342	7.94841	23.917	4.32049	43.5135	10.0714	3.3322	0.0214389	0.717393	-	-	-	-	-	-	-	-	-	-	-	-	-	-	-	-	-	-
1656D_37327_c0_g1_i1	658	1656C;1656D	134	2	134	2	20.2746	0.305381	73.2941	144.737	1.85164	0.0127932	-6.28848	1.08131e-05	0.00383173	XP_010933538.1	PREDICTED: putative invertase inhibitor	Elaeis guineensis	-	-	-	-	-	-	-	-	-	-	-	-	-	-	-
1656D_3733_c0_g1_i1	706	1656C;1656D	3	104	3	104	0.403199	14.1416	49.7628	3.24037	96.2853	29.7143	4.89308	0.000497771	0.0676511	XP_022759606.1	auxin-responsive protein SAUR32	Durio zibethinus	-	-	-	-	-	-	-	-	-	-	-	-	-	-	-
1656D_37333_c1_g1_i1	1661	1656C;1656D	63	8	63	8	2.589	0.336801	37.7272	68.0478	7.40656	0.108844	-3.19967	0.0129124	0.56353	XP_020250145.1	uncharacterized protein LOC109827551	Asparagus officinalis	-	-	-	-	-	-	-	-	-	-	-	-	-	-	-
1656D_37361_c0_g1_i1	2090	1656C;1656D	291	1248	291	1248	9.11355	40.0969	734.87	314.316	1155.42	3.67599	1.87813	0.019622	0.702223	OVA20646.1	Protein of unknown function DUF791	Macleaya cordata	A0A200RD72	Uncharacterized protein	BVC80_883g18	Macleaya cordata	-	-	-	-	integral component of membrane [GO:0016021]; molybdate ion transmembrane transporter activity [GO:0015098]	GO:0015098; GO:0016021	-	integral component of membrane [GO:0016021]	molybdate ion transmembrane transporter activity [GO:0015098]	-	-
1656D_37365_c0_g1_i1	1091	1656C;1656D	76.0406	13.0239	76	13	5.33991	0.93306	47.0625	82.0894	12.0357	0.146617	-2.76988	0.0213545	0.717393	XP_009400649.1	PREDICTED: F-box only protein 6-like	Musa acuminata subsp. malaccensis	M0SX68	Uncharacterized protein	103984815	Musa acuminata subsp. malaccensis (Wild banana) (Musa malaccensis)	-	103984815	-	-	-	-	-	-	-	-	mus:103984815;
1656D_37380_c0_g2_i1	2565	1656C;1656D	10	298.631	10	299	0.247882	7.60132	143.811	10.8012	276.82	25.6286	4.67968	1.92127e-05	0.00582542	-	-	-	-	-	-	-	-	-	-	-	-	-	-	-	-	-	-
1656D_37385_c0_g1_i2	718	1656C;1656D	3	39.9311	3	40	0.392119	5.28266	20.1366	3.24037	37.0328	11.4286	3.51457	0.0216924	0.717393	XP_012439339.1	PREDICTED: uncharacterized protein LOC105765014 isoform X2	Gossypium raimondii	-	-	-	-	-	-	-	-	-	-	-	-	-	-	-
1656D_37453_c0_g1_i1	1678	1656C;1656D	141.053	3066.23	141	3066	5.72579	127.52	1495.43	152.297	2838.56	18.6383	4.2202	2.76385e-06	0.00127206	XP_020250695.1	tuliposide A-converting enzyme 1, chloroplastic-like	Asparagus officinalis	-	-	-	-	-	-	-	-	-	-	-	-	-	-	-
1656D_37453_c0_g1_i2	2567	1656C;1656D	16.9467	478.774	17	479	0.419709	12.176	230.915	18.3621	443.468	24.1513	4.59403	4.62624e-06	0.00196482	XP_004294833.1	PREDICTED: probable carboxylesterase 12	Fragaria vesca subsp. vesca	-	-	-	-	-	-	-	-	-	-	-	-	-	-	-
1656D_37476_c0_g1_i1	749	1656C;1656D	41.6044	1	42	1	5.0803	0.123609	23.1455	45.3652	0.92582	0.0204082	-5.61471	0.00156882	0.149409	-	-	-	-	-	-	-	-	-	-	-	-	-	-	-	-	-	-
1656D_37479_c0_g1_i1	1213	1656C;1656D	0.644907	116.907	1	117	0.0393225	7.2818	54.7005	1.08012	108.321	100.286	6.64797	4.20485e-05	0.0108185	XP_020103880.1	probable LRR receptor-like serine/threonine-protein kinase At1g74360	Ananas comosus	-	-	-	-	-	-	-	-	-	-	-	-	-	-	-
1656D_37479_c0_g2_i2	3787	1656C;1656D	35.3551	939.093	35	939	0.570417	15.5776	453.575	37.8043	869.345	22.9959	4.52331	1.08951e-06	0.000623081	POO01935.1	Serine/threonine protein kinase	Trema orientalis	A0A2P5FVY8	Serine/threonine protein kinase	TorRG33x02_022270	Trema orientalis	-	-	-	-	integral component of membrane [GO:0016021]; ATP binding [GO:0005524]; protein serine/threonine kinase activity [GO:0004674]	GO:0004674; GO:0005524; GO:0016021	-	integral component of membrane [GO:0016021]	ATP binding [GO:0005524]; protein serine/threonine kinase activity [GO:0004674]	-	-
1656D_37479_c0_g2_i4	537	1656C;1656D	10	71	10	71	2.16915	15.5698	38.2672	10.8012	65.7332	6.08571	2.60543	0.0371951	0.920048	-	-	-	-	-	-	-	-	-	-	-	-	-	-	-	-	-	-
1656D_37506_c0_g1_i1	989	1656C;1656D	99	16	99	16	7.96215	1.31087	60.8727	106.932	14.8131	0.138528	-2.85175	0.0132249	0.573271	XP_009396026.1	PREDICTED: PLASMODESMATA CALLOSE-BINDING PROTEIN 1-like	Musa acuminata subsp. malaccensis	-	-	-	-	-	-	-	-	-	-	-	-	-	-	-
1656D_37523_c1_g1_i1	1373	1656C;1656D	85	5	85	5	4.41932	0.2659	48.2198	91.8105	4.6291	0.0504202	-4.30986	0.00117615	0.123072	XP_010236871.1	pentatricopeptide repeat-containing protein At2g27610	Brachypodium distachyon	I1IDZ3	Uncharacterized protein	LOC100846425 100846118 BRADI_3g55520v3	Brachypodium distachyon (Purple false brome) (Trachynia distachya)	100846118	LOC100846425	-	-	intracellular membrane-bounded organelle [GO:0043231]; endonuclease activity [GO:0004519]; RNA binding [GO:0003723]; zinc ion binding [GO:0008270]; RNA modification [GO:0009451]	GO:0003723; GO:0004519; GO:0008270; GO:0009451; GO:0043231	RNA modification [GO:0009451]	intracellular membrane-bounded organelle [GO:0043231]	endonuclease activity [GO:0004519]; RNA binding [GO:0003723]; zinc ion binding [GO:0008270]	-	bdi:100846118;
1656D_37532_c0_g1_i1	703	1656C;1656D	1	29	1	29	0.135366	3.97078	13.9645	1.08012	26.8488	24.8571	4.63559	0.0139711	0.589041	XP_020257536.1	WAT1-related protein At1g21890-like	Asparagus officinalis	-	-	-	-	-	-	-	-	-	-	-	-	-	-	-
1656D_37550_c0_g2_i1	831	1656C;1656D	40.7289	1.0931	41	1	4.22589	0.115137	22.6054	44.2851	0.92582	0.0209059	-5.57994	0.00172413	0.159212	-	-	-	-	-	-	-	-	-	-	-	-	-	-	-	-	-	-
1656D_37565_c0_g1_i1	1882	1656C;1656D	1343	6782	1343	6782	47.5446	246.167	3864.76	1450.61	6278.91	4.32848	2.11386	0.0181782	0.660996	XP_020265168.1	vacuolar-processing enzyme-like	Asparagus officinalis	-	-	-	-	-	-	-	-	-	-	-	-	-	-	-
1656D_37565_c1_g2_i1	2693	1656C;1656D	68	452	68	452	1.59593	10.8952	245.96	73.4484	418.471	5.69748	2.51032	0.00469649	0.308747	-	-	-	-	-	-	-	-	-	-	-	-	-	-	-	-	-	-
1656D_37565_c2_g1_i1	1126	1656C;1656D	15	97	15	97	1.00943	6.66221	53.0032	16.2019	89.8045	5.54286	2.47063	0.0342716	0.864626	-	-	-	-	-	-	-	-	-	-	-	-	-	-	-	-	-	-
1656D_37565_c3_g1_i1	688	1656C;1656D	52	293	52	293	7.29636	41.5692	163.716	56.1664	271.265	4.82967	2.27192	0.0149251	0.60541	-	-	-	-	-	-	-	-	-	-	-	-	-	-	-	-	-	-
1656D_37565_c5_g1_i1	345	1656C;1656D	2	30	2	30	0.925426	14.6877	14.9674	2.16025	27.7746	12.8571	3.6845	0.0278686	0.808904	-	-	-	-	-	-	-	-	-	-	-	-	-	-	-	-	-	-
1656D_37565_c6_g1_i1	333	1656C;1656D	1	25	1	25	0.48849	12.9616	12.1128	1.08012	23.1455	21.4286	4.42146	0.021391	0.717393	-	-	-	-	-	-	-	-	-	-	-	-	-	-	-	-	-	-
1656D_37569_c0_g1_i1	851	1656C;1656D	42	8	42	8	4.20374	0.813287	26.3859	45.3652	7.40656	0.163265	-2.61471	0.0496859	1	XP_010906692.1	PREDICTED: AAA-ATPase ASD, mitochondrial-like	Elaeis guineensis	-	-	-	-	-	-	-	-	-	-	-	-	-	-	-
1656D_37584_c0_g1_i1	1527	1656C;1656D	3	1287	3	1287	0.136607	59.9992	597.385	3.24037	1191.53	367.714	8.52244	5.08334e-13	4.51722e-09	PKA66733.1	hypothetical protein AXF42_Ash003388	Apostasia shenzhenica	A0A2I0BFZ7	Uncharacterized protein	AXF42_Ash003388	Apostasia shenzhenica	-	-	-	-	integral component of membrane [GO:0016021]; methyltransferase activity [GO:0008168]	GO:0008168; GO:0016021	-	integral component of membrane [GO:0016021]	methyltransferase activity [GO:0008168]	-	-
1656D_37587_c0_g1_i1	610	1656C;1656D	13823	3702	13823	3702	2388.12	644.209	9178.97	14930.5	3427.39	0.229555	-2.12309	0.0408477	0.945471	XP_020253235.1	photosystem I subunit O	Asparagus officinalis	-	-	-	-	-	-	-	-	-	-	-	-	-	-	-
1656D_37597_c0_g1_i2	1583	1656C;1656D	961.726	332.944	962	333	41.9008	14.8552	673.688	1039.08	308.298	0.296703	-1.75291	0.0289312	0.813831	XP_010920552.1	PREDICTED: uncharacterized protein At5g02240	Elaeis guineensis	-	-	-	-	-	-	-	-	-	-	-	-	-	-	-
1656D_37619_c2_g1_i1	600	1656C;1656D	24	2	24	2	4.26803	0.358468	13.8873	25.923	1.85164	0.0714286	-3.80735	0.0241598	0.767531	ACN35817.1	unknown	Zea mays	C0PKV1	Uncharacterized protein	-	Zea mays (Maize)	-	-	-	-	-	-	-	-	-	-	-
1656D_37626_c0_g1_i1	1734	1656C;1656D	109	29	109	29	4.25343	1.15966	72.2911	117.733	26.8488	0.228047	-2.1326	0.0474393	1	XP_018686712.1	PREDICTED: uncharacterized protein LOC103998676 isoform X1	Musa acuminata subsp. malaccensis	-	-	-	-	-	-	-	-	-	-	-	-	-	-	-
1656D_37650_c0_g1_i1	275	1656C;1656D	16	1	16	1	10.5758	0.702368	9.1039	17.282	0.92582	0.0535714	-4.22239	0.0338303	0.861749	-	-	-	-	-	-	-	-	-	-	-	-	-	-	-	-	-	-
1656D_37660_c0_g1_i1	1493	1656C;1656D	17	127	17	127	0.795928	6.08644	67.9706	18.3621	117.579	6.40336	2.67883	0.0170735	0.658309	XP_020251114.1	uncharacterized protein LOC109828557, partial	Asparagus officinalis	-	-	-	-	-	-	-	-	-	-	-	-	-	-	-
1656D_37660_c1_g1_i1	843	1656C;1656D	2	29	2	29	0.203037	2.98995	14.5045	2.16025	26.8488	12.4286	3.63559	0.0306354	0.848087	PIA35113.1	hypothetical protein AQUCO_03600049v1, partial	Aquilegia coerulea	A0A2G5CV24	Uncharacterized protein (Fragment)	AQUCO_03600049v1	Aquilegia coerulea (Rocky mountain columbine)	-	-	-	-	-	-	-	-	-	-	-
1656D_37670_c0_g1_i1	1361	1656C;1656D	74	17	74	17	3.89039	0.914085	47.834	79.9291	15.7389	0.196911	-2.34438	0.0458925	0.989104	-	-	-	-	-	-	-	-	-	-	-	-	-	-	-	-	-	-
1656D_37681_c1_g1_i1	319	1656C;1656D	1	29	1	29	0.522696	16.0695	13.9645	1.08012	26.8488	24.8571	4.63559	0.0139711	0.589041	XP_020270826.1	probable WRKY transcription factor 41	Asparagus officinalis	-	-	-	-	-	-	-	-	-	-	-	-	-	-	-
1656D_37712_c0_g1_i1	1170	1656C;1656D	2017.98	112	2018	112	129.035	7.31271	1141.69	2179.69	103.692	0.0475719	-4.39375	1.02466e-06	0.000588908	XP_020245715.1	xyloglucan endotransglucosylase/hydrolase protein A-like	Asparagus officinalis	-	-	-	-	-	-	-	-	-	-	-	-	-	-	-
[truncated: 1,936 more rows]

## Sheet: Up Regulated Transcripts
Transcript Ids	Transcript Length	Transcript Library	1656C Estimated Read Count (Control)	1656D Estimated Read Count (Drought)	Rounded Count 1656C	Rounded Count 1656D	1656C TPM (Control)	1656D TPM (Drought)	baseMean	baseMean_1656C	baseMean_1656D	foldChange [1656C vs. 1656D]	log2FoldChange [1656C vs. 1656D]	pval [1656C vs. 1656D]	padj [1656C vs. 1656D]	NRDB Accession	NRDB Description	Organism(NRDB)	UniPort Accession	Protein Names	Gene Names	Organism	Gene Names (Synonym )	Gene Names (Primary )	EC Number	Pathway	Gene Ontology (GO)	Gene Ontology IDs	Gene Ontology (biological process)	Gene Ontology (cellular component)	Gene Ontology (molecular function)	Subcellular Location [CC]	KEGG
[truncated: 1,189 more rows]

[truncated: 2 more sheets: Down Regulated Transcripts, Baseline Expressed Transcripts]
